# Supplementary material for: RETrace: simultaneous retrospective lineage tracing and methylation profiling of single cells
Source: HighWire-hosted journal article supplement (doi:10.1101/gr.255851.119), 2020-03-03
Supplement: Supplemental_Table_S4.xlsx [file Supplemental_Table_S4.xlsx]

## Sheet: Supplementary Table S4
Supplementary Table S4: Sequencing statistics for filtered HCT116 single cells
	Microsatellite Statistics			Methylaion Statistics
Sample	Raw Reads (SE)	Mapping Efficiency	Microsatellite Targets (>= 30 reads)	Raw Reads (PE)	Mapping Efficiency	Conversion Efficiency	Unique CpG (1x)	Mean Coverage (1x)	Unique CpG (5x)	Mean Coverage (5x)	Unique CpG (10x)	Mean Coverage (10x)	Number CGI	Mean Coverage
1-1-F3_2-2-B1_4B	3270010	0.997605	1185	254386	0.615726	0.997726	198446	2	9999	5.99	266	18.46	8578	7.44
1-1-F3_2-2-B1_4C	3977382	0.997522	1339	214454	0.613055	0.99746	175678	1.9	7034	6.09	260	18.56	8079	6.56
1-1-F3_2-2-B1_4D	3077004	0.996567	836	210706	0.582774	0.999665	124852	2.35	11992	6.34	462	19.57	6421	6.88
1-1-F3_2-2-B1_4E	3542763	0.996908	819	186076	0.58417	0.999581	103670	2.43	11138	6.2	382	14.53	5483	6.87
1-1-F3_2-2-B1_4F	3601745	0.997604	1266	195950	0.62962	0.996333	176454	1.68	3562	6.2	208	17.92	8065	5.66
1-1-F3_2-2-B1_4G	2550434	0.99718	922	353576	0.615754	0.99746	271697	2.08	15562	6.23	545	21.75	10127	9.03
1-1-F3_2-2-B1_5C	3834651	0.997391	992	142854	0.623238	0.996393	106728	2.21	8497	6.12	376	13.46	5740	6.51
1-1-F3_2-2-B1_5D	3876430	0.997787	1287	420540	0.63661	0.998565	231450	2.8	36709	6.47	2310	13.92	9345	11.07
1-1-F3_2-2-B1_5F	2882819	0.997329	1299	334100	0.612757	0.999472	218282	2.22	15605	6.35	468	25.26	9307	8.44
1-1-F3_2-2-B1_5G	2899162	0.997492	1106	504066	0.621859	0.997375	247761	3.08	50245	6.55	3239	13.84	9689	12.94
1-1-F3_2-2-B1_6B	2089460	0.996668	563	41772	0.531361	0.99544	47857	1.63	1189	5.72	30	17.67	3440	3.97
1-1-F3_2-2-B1_6C	4763428	0.997389	1531	99688	0.567109	0.995469	101764	1.79	3578	6.31	177	20.03	6207	5.26
1-1-F3_2-2-B1_6D	3480845	0.996663	944	95956	0.561507	0.99974	100553	1.82	4073	5.98	145	14.73	5934	5.46
1-1-F3_2-2-B1_6E	3162352	0.996179	768	215822	0.57325	0.999385	140587	2.18	10379	6.22	388	15.72	7013	6.75
1-1-F3_2-2-B1_6F	2709750	0.996755	945	196232	0.636104	0.995456	179152	1.71	3977	6.17	187	18.72	8305	5.78
1-1-F3_2-2-B1_6G	2820220	0.996847	962	387812	0.620105	0.995946	250696	2.34	23049	6.26	976	17.25	9965	9.66
2-1-A6_3-5-B2_1B	3224390	0.996721	626	124458	0.58913	0.998423	50555	1.92	2004	5.92	57	17.74	2905	4.28
2-1-A6_3-5-B2_1C	3309639	0.997132	594	123004	0.527706	0.998545	48801	1.79	1375	5.68	19	16.32	2881	4
2-1-A6_3-5-B2_1D	2720440	0.996842	552	149384	0.586448	0.999126	63448	1.92	2302	6.16	72	23.97	3407	4.53
2-1-A6_3-5-B2_1E	4153667	0.998162	2620	295742	0.678301	0.999023	234295	1.25	687	11.34	253	20.74	9649	4.41
2-1-A6_3-5-B2_1F	3997426	0.997727	1234	230982	0.619295	0.998321	125290	1.61	1663	6.5	120	19.06	6183	4.41
2-1-A6_3-5-B2_1G	3309151	0.997998	1360	197902	0.619549	0.998145	110041	1.46	677	7.44	99	17.67	5377	3.78
2-1-A6_3-5-B2_2B	4992768	0.99748	1587	265626	0.623252	0.99863	155466	1.69	2722	6.9	277	20.49	7405	5.3
2-1-A6_3-5-B2_2C	4794167	0.997603	1559	250660	0.601301	0.998439	146031	1.49	1365	7.4	244	15.88	6898	4.34
2-1-A6_3-5-B2_2D	4073463	0.997832	1756	242862	0.625153	0.994346	158985	1.44	1075	7.48	153	17.46	7224	4.49
2-1-A6_3-5-B2_2E	5059206	0.997587	1760	231262	0.586149	0.998455	128666	1.43	791	8.33	210	15.33	6178	4.01
2-1-A6_3-5-B2_2F	4168743	0.99774	1883	280018	0.613961	0.997715	161018	1.43	999	8.49	213	18.11	7258	4.22
2-1-A6_3-5-B2_3B	4867440	0.99666	1530	259876	0.594122	0.998818	159892	1.56	1575	8.13	274	20.51	7688	4.99
2-1-A6_3-5-B2_3C	4670852	0.997167	2060	239326	0.599208	0.99895	205225	1.26	677	10.68	217	20.28	9117	4.44
2-1-A6_3-5-B2_3D	4116014	0.991229	537	160288	0.36367	0.999431	57786	1.65	827	5.92	38	14.29	3399	4.16
2-1-A6_3-5-B2_3F	5492776	0.997406	2115	233364	0.646638	0.997057	183219	1.29	665	9.72	191	18.91	8360	4.2
2-1-A6_3-5-B2_3G	3536141	0.995414	775	144942	0.513295	0.997521	79274	1.58	986	6.64	97	15.36	4621	4.05
2-1-A6_3-5-B3_1C	3524884	0.997078	1860	500116	0.56692	0.999309	216596	1.86	6532	6.75	426	24.03	9039	6.23
2-1-A6_3-5-B3_1D	3288326	0.995983	975	274692	0.384656	0.999416	67798	2.54	7834	6.28	410	14.48	4036	6.46
2-1-A6_3-5-B3_1E	4169214	0.995618	1028	324414	0.493592	0.999673	96885	2.47	10259	6.14	442	14.73	5034	6.49
2-1-A6_3-5-B3_1F	3340996	0.996366	1714	452320	0.525641	0.999836	177256	1.93	6339	6.43	324	22.19	7902	6.07
2-1-A6_3-5-B3_1G	3161590	0.995411	1479	259544	0.462565	0.999751	114074	1.84	3262	6.14	171	18.16	5991	5.36
2-1-A6_3-5-B3_2B	3961436	0.995226	984	228586	0.389683	0.996664	53175	2.92	9445	6.45	610	12.95	3422	7.24
2-1-A6_3-5-B3_2C	3979136	0.99703	1864	318748	0.45808	0.998233	86804	2.61	10849	6.35	636	13.78	4679	7.12
2-1-A6_3-5-B3_2D	4186192	0.996313	1502	280848	0.398372	0.994911	75403	2.69	10347	6.42	611	14.73	4446	7.32
2-1-A6_3-5-B3_2E	4623664	0.997273	2126	339788	0.497616	0.999413	119665	2.12	7011	6.25	311	18.86	5910	6.16
2-1-A6_3-5-B3_2F	3341069	0.996261	1416	177638	0.304766	0.998094	31950	3.25	7048	6.7	570	13.89	2375	7.7
2-1-A6_3-5-B3_2G	4159240	0.996192	1405	198346	0.42926	0.99753	66435	2.26	5185	6.3	284	14.73	4047	5.92
2-1-A6_3-5-B3_3B	3745377	0.996378	1489	222716	0.298596	0.995313	50325	2.8	7682	6.59	689	13.59	3373	7.47
2-1-A6_3-5-B3_3C	3861962	0.996874	1585	423846	0.524804	0.996531	184034	1.77	4549	6.64	381	18.03	8198	5.71
2-1-A6_3-5-B3_3D	4184467	0.996333	1493	300744	0.41678	0.998972	111097	2.05	6114	6.34	399	15.06	5980	6.11
2-1-A6_3-5-B3_3E	6627993	0.996204	1627	171166	0.282907	0.998971	39113	2.78	6156	6.48	441	12.94	2883	7.16
2-1-A6_3-5-B3_3F	3780323	0.996566	1511	324488	0.456331	0.999149	115260	2.06	6241	6.42	418	16.18	5958	6.13
2-1-G10_3-1-A2_5B	4025766	0.996171	946	425888	0.391939	0.99807	117674	2.79	18449	6.47	1089	14.24	6208	8.02
2-1-G10_3-1-A2_5C	3795873	0.99746	1313	555414	0.456586	0.997738	265298	2.1	15243	6.59	756	23.12	10504	8.36
2-1-G10_3-1-A2_5D	3546511	0.996889	1043	442164	0.429655	0.998802	209157	2.18	14594	6.2	508	19.79	9214	7.92
2-1-G10_3-1-A2_5F	3957877	0.99728	1265	554910	0.479188	0.999181	311958	2.27	24348	6.34	940	21.16	11318	10.35
2-1-G10_3-1-A2_5G	4328059	0.997417	1418	349628	0.420916	0.997384	203499	1.9	7736	6.39	380	22.71	9344	6.74
2-1-G10_3-1-A2_6B	4655350	0.994973	970	243552	0.390479	0.994531	73767	2.87	12253	7.04	1452	13.85	4327	7.28
2-1-G10_3-1-A2_6C	4212099	0.996014	1017	185102	0.551264	0.993236	89629	2.63	12366	6.64	858	13.98	4878	6.95
2-1-G10_3-1-A2_6D	4221430	0.995601	906	165126	0.485302	0.996623	85864	2.52	10695	6.55	831	13.05	4884	6.8
2-1-G10_3-1-A2_6E	5295008	0.99647	1496	337142	0.518049	0.994308	171962	2.37	16249	6.56	897	19.04	8067	7.59
2-1-G10_3-1-A2_6F	4943478	0.996527	1268	265790	0.536393	0.986253	141854	2.46	16010	6.53	928	15.84	7071	7.3
2-1-G10_3-1-A2_6G	4548353	0.996048	1137	242904	0.502067	0.998042	140719	2.32	13301	6.37	687	15.33	7129	7.25
2-1-G10_3-1-B1_7B	3250237	0.996779	905	214582	0.489491	0.998545	76596	2.62	10590	6.1	360	14.74	4186	6.96
2-1-G10_3-1-B1_7C	4386852	0.998157	2159	448396	0.602409	0.998851	314508	1.55	3448	7.85	452	23.98	11220	6.46
2-1-G10_3-1-B1_7D	3379479	0.998067	1920	314020	0.584918	0.998906	251422	1.39	1389	9.02	316	20.29	10391	5.19
2-1-G10_3-1-B1_7E	4710508	0.997394	1288	322170	0.568625	0.998717	212545	1.44	1653	7.49	264	17.91	9031	4.63
2-1-G10_3-1-B1_7F	3530853	0.99769	1393	204656	0.496218	0.999079	125614	1.97	5461	6.23	278	17.8	6679	6.01
2-1-G10_3-1-B1_7G	3082190	0.997284	1517	119954	0.469447	0.998141	33249	2.59	4057	6.53	127	27.61	2041	5.7
2-1-G10_3-1-B1_8B	3455791	0.996177	943	339688	0.558518	0.999696	168293	2.19	10784	6.2	395	21.7	7516	7.27
2-1-G10_3-1-B1_8C	3494582	0.996174	1011	105470	0.510249	0.998594	43359	2.63	6247	6.4	271	14.2	2716	6.11
2-1-G10_3-1-B1_8D	3521604	0.996166	949	126472	0.467945	0.999051	56191	2.22	4339	6	133	15.53	3222	5.63
2-1-G10_3-1-B1_8F	2856209	0.99742	1600	272566	0.635817	0.998579	162552	2.15	9948	6.23	320	23.74	7151	7.12
2-1-G10_3-1-B1_9B	2787953	0.996924	882	145248	0.507532	0.995602	86762	1.97	3887	6.18	124	22.99	5101	5.36
2-1-G10_3-1-B1_9C	3006094	0.99708	930	160574	0.586882	0.993275	63942	2.36	6101	6.04	164	18.76	3605	5.73
2-1-G10_3-1-B1_9D	3478077	0.998019	1809	202800	0.649231	0.996385	140442	1.7	2639	6.3	154	19.08	6663	5.27
2-1-G10_3-1-B1_9E	2794506	0.997648	1322	232934	0.620184	0.998244	127283	1.73	2643	6.83	265	19.45	6022	5.02
2-1-G10_3-1-B1_9F	3901662	0.997847	1504	159022	0.573002	0.998558	94655	1.97	4290	6.1	188	16.74	5052	5.49
2-1-G10_3-1-B1_9G	2182100	0.997407	926	184230	0.587722	0.997828	103230	1.88	3281	6.44	172	21.85	5222	5.38
2-1-H7_3-6-C6_10B	4445485	0.995565	1013	143158	0.508166	0.997411	84764	2.09	5453	6.25	212	17.39	4896	5.68
2-1-H7_3-6-C6_10C	5481382	0.996071	1024	172164	0.494412	0.996467	103007	2.02	5511	6.21	232	18.56	5861	5.59
2-1-H7_3-6-C6_10D	4152414	0.995681	888	134616	0.525406	0.995641	94682	1.82	3305	6.03	152	16.47	5449	4.99
2-1-H7_3-6-C6_10E	4576817	0.996663	1386	320842	0.57806	0.999661	222770	2.19	16382	6.18	567	18.46	9448	8.6
2-1-H7_3-6-C6_10F	3440487	0.995406	916	255420	0.502686	0.994935	138960	2.29	11446	6.2	426	18.93	7005	7.23
2-1-H7_3-6-C6_10G	2510652	0.994909	561	152784	0.463831	0.998451	90451	2.34	8715	6.14	309	15.17	5055	6.95
2-1-H7_3-6-C6_11B	2901509	0.995717	911	182936	0.500579	0.999401	133329	1.89	5319	5.93	240	14.61	6888	6.07
2-1-H7_3-6-C6_11C	5010198	0.997117	1687	293854	0.565662	0.995658	227534	1.65	3532	7.18	341	22.72	9856	6.17
2-1-H7_3-6-C6_11E	3983154	0.996365	1315	304094	0.580419	0.997513	203636	2.15	13326	6.14	521	17.91	8732	8.43
2-1-H7_3-6-C6_11F	4033346	0.997028	1681	345920	0.460361	0.995768	251484	1.63	4306	7.03	370	23.23	10260	6.97
2-1-H7_3-6-C6_12B	2172394	0.995708	781	166562	0.537722	0.999749	137391	1.78	3943	6.36	184	22.09	7000	5.82
2-1-H7_3-6-C6_12C	2775407	0.9961	922	356300	0.568869	0.997182	188077	2.19	13596	6.06	461	17.89	8452	7.01
2-1-H7_3-6-C6_12D	2342249	0.996177	1038	301406	0.596219	0.999922	246084	2.04	12932	6.2	514	19.77	9730	8.53
2-1-H7_3-6-C6_12E	3030722	0.995373	773	299610	0.490825	0.996911	128789	2.95	23797	6.42	1405	12.87	6373	9.48
2-1-H7_3-6-C6_12F	2951852	0.995287	870	281880	0.511196	0.999689	136393	2.53	16616	6.26	692	15.38	6918	7.86
2-1-H7_3-6-C6_12G	1612746	0.995836	535	229442	0.532954	0.999414	147831	2.35	13673	6.06	344	15.71	6817	8.44
2-1-H7_3-6-G7_10B	2376612	0.996772	281	172224	0.556868	0.997633	34180	5.28	16405	8.38	4821	12.61	1982	12.28
2-1-H7_3-6-G7_10G	2682797	0.997271	398	118742	0.582254	0.996732	30220	4.67	12957	7.87	3051	12.23	1753	11.21
2-1-H7_3-6-G7_11B	2653698	0.99694	321	110198	0.400733	0.997605	40707	3.49	10980	7.06	1432	12.27	2742	9.26
2-1-H7_3-6-G7_11D	6196457	0.997617	953	388898	0.545418	0.996003	102682	3.08	19980	6.62	1351	15.46	4815	9.1
2-1-H7_3-6-G7_11E	4352284	0.997786	680	305056	0.557452	0.991152	99651	3.51	27091	6.64	2018	12.45	4914	10.53
2-1-H7_3-6-G7_11G	2275841	0.996765	364	189248	0.446187	0.996337	41120	3.94	14168	6.96	1630	11.79	2433	9.91
2-1-H7_3-6-G7_12E	2244905	0.997605	314	288854	0.545431	0.99815	71012	4.51	29320	7.52	5221	12.32	3643	12.64
2-2-B1_3-2-A6_7B	3693591	0.997295	1421	45942	0.503069	0.98933	51294	1.52	865	7.28	121	17.79	4226	4.07
2-2-B1_3-2-A6_7D	3836668	0.997309	1449	311310	0.589445	0.999651	241929	1.84	8285	6.08	337	18.73	9708	7.29
2-2-B1_3-2-A6_7E	4384392	0.997351	1457	383720	0.562238	0.996055	273415	2.32	24841	6.46	1056	20.68	10550	10.27
2-2-B1_3-2-A6_7F	3665236	0.997209	1309	319758	0.63488	0.996147	268682	1.8	8312	6.65	515	23.4	10399	7.27
2-2-B1_3-2-A6_7G	3654228	0.99743	1102	310464	0.593383	0.998831	187371	1.79	4563	6.98	397	22.16	8254	5.55
2-2-B1_3-2-A6_8B	4065395	0.997097	1558	348576	0.583637	0.997835	226598	2.31	19355	6.33	762	19.47	9421	9.21
2-2-B1_3-2-A6_8C	4499512	0.997398	1707	456090	0.602443	0.999483	326196	2.04	16472	6.47	654	26.05	11301	9.64
2-2-B1_3-2-A6_8D	3452459	0.995755	1026	282090	0.514531	0.997813	140682	2.28	11286	6.46	457	22.94	6803	7.12
2-2-B1_3-2-A6_8E	4443959	0.996775	1305	504080	0.529583	0.99983	278427	2.3	23449	6.2	860	19.73	10471	10.12
2-2-B1_3-2-A6_8F	3889281	0.997031	1420	360110	0.542468	0.999121	224605	2.04	11967	6.41	559	21.91	9400	7.8
2-2-B1_3-2-A6_8G	4638424	0.996257	1037	235016	0.508204	0.9979	126389	2.23	9557	6.37	436	19.23	6693	6.78
2-2-B1_3-2-A6_9B	3413646	0.997458	1464	273030	0.574193	0.996952	209236	2.1	12938	6.28	545	19.05	9108	8.21
2-2-B1_3-2-A6_9C	3367446	0.997549	1461	348074	0.598591	0.998726	300505	1.97	14146	6.38	541	24.05	10809	9.28
2-2-B1_3-2-A6_9D	3820720	0.997591	1516	202982	0.512912	0.996048	147358	2	7325	6.33	222	27.21	6541	7.02
2-2-B1_3-2-A6_9E	2919581	0.994751	906	279186	0.434406	0.993802	134021	2.27	10585	6.43	534	18.51	6918	7.13
2-2-B1_3-2-A6_9F	3212598	0.997865	1778	472824	0.585825	0.996775	380802	1.68	7250	7.49	550	31.48	12858	8.03
