# Supplementary material for: RETrace: simultaneous retrospective lineage tracing and methylation profiling of single cells
Source: HighWire-hosted journal article supplement (doi:10.1101/gr.255851.119), 2020-03-03
Supplement: Supplemental_Table_S5.xlsx [file Supplemental_Table_S5.xlsx]

## Sheet: Supplementary Table S5
Supplementary Table S5: HipSTR allelotype calls for filtered HCT116 single cells (HipSTR q >= 0.7)
targetID	1-1-F3_2-2-B1_4B	1-1-F3_2-2-B1_4C	1-1-F3_2-2-B1_4D	1-1-F3_2-2-B1_4E	1-1-F3_2-2-B1_4F	1-1-F3_2-2-B1_4G	1-1-F3_2-2-B1_5C	1-1-F3_2-2-B1_5D	1-1-F3_2-2-B1_5F	1-1-F3_2-2-B1_5G	1-1-F3_2-2-B1_6B	1-1-F3_2-2-B1_6C	1-1-F3_2-2-B1_6D	1-1-F3_2-2-B1_6E	1-1-F3_2-2-B1_6F	1-1-F3_2-2-B1_6G	2-1-A6_3-5-B2_1B	2-1-A6_3-5-B2_1C	2-1-A6_3-5-B2_1D	2-1-A6_3-5-B2_1E	2-1-A6_3-5-B2_1F	2-1-A6_3-5-B2_1G	2-1-A6_3-5-B2_2B	2-1-A6_3-5-B2_2C	2-1-A6_3-5-B2_2D	2-1-A6_3-5-B2_2E	2-1-A6_3-5-B2_2F	2-1-A6_3-5-B2_3B	2-1-A6_3-5-B2_3C	2-1-A6_3-5-B2_3D	2-1-A6_3-5-B2_3F	2-1-A6_3-5-B2_3G	2-1-A6_3-5-B3_1C	2-1-A6_3-5-B3_1D	2-1-A6_3-5-B3_1E	2-1-A6_3-5-B3_1F	2-1-A6_3-5-B3_1G	2-1-A6_3-5-B3_2B	2-1-A6_3-5-B3_2C	2-1-A6_3-5-B3_2D	2-1-A6_3-5-B3_2E	2-1-A6_3-5-B3_2F	2-1-A6_3-5-B3_2G	2-1-A6_3-5-B3_3B	2-1-A6_3-5-B3_3C	2-1-A6_3-5-B3_3D	2-1-A6_3-5-B3_3E	2-1-A6_3-5-B3_3F	2-1-G10_3-1-A2_5B
chr10:100186502-100186536	.|.	.|.	.|.	.|.	.|.	.|.	.|.	.|.	.|.	.|.	.|.	.|.	.|.	.|.	.|.	.|.	.|.	.|.	.|.	.|.	.|.	.|.	.|.	.|.	34|36	.|.	.|.	.|.	.|.	.|.	.|.	.|.	.|.	.|.	.|.	.|.	.|.	.|.	.|.	.|.	.|.	.|.	.|.	.|.	.|.	.|.	.|.	.|.	.|.
chr10:100272569-100272599	.|.	.|.	.|.	.|.	.|.	.|.	.|.	46|48	.|.	48|48	.|.	.|.	.|.	.|.	.|.	.|.	.|.	.|.	.|.	40|50	.|.	.|.	.|.	.|.	.|.	.|.	.|.	54|56	.|.	.|.	54|56	.|.	.|.	.|.	.|.	.|.	.|.	.|.	.|.	.|.	.|.	.|.	.|.	54|54	.|.	.|.	.|.	48|56	.|.
chr10:100312050-100312080	.|.	30|30	.|.	.|.	.|.	.|.	.|.	.|.	30|30	.|.	.|.	.|.	.|.	.|.	.|.	.|.	.|.	.|.	.|.	.|.	.|.	.|.	.|.	.|.	.|.	.|.	.|.	.|.	.|.	.|.	.|.	.|.	30|30	.|.	.|.	.|.	30|30	.|.	.|.	30|30	.|.	30|30	.|.	.|.	30|30	30|30	.|.	.|.	.|.
chr10:100647892-100647930	.|.	.|.	.|.	.|.	.|.	.|.	.|.	.|.	.|.	.|.	.|.	.|.	.|.	.|.	.|.	.|.	.|.	.|.	.|.	.|.	.|.	.|.	.|.	.|.	.|.	.|.	.|.	.|.	30|30	.|.	38|40	.|.	.|.	.|.	.|.	30|32	.|.	.|.	.|.	.|.	.|.	38|42	.|.	.|.	.|.	.|.	.|.	38|42	.|.
chr10:100709007-100709033	.|.	.|.	.|.	22|22	10|10	.|.	.|.	22|22	.|.	.|.	.|.	10|10	.|.	.|.	.|.	.|.	.|.	.|.	.|.	24|24	.|.	.|.	.|.	.|.	.|.	10|22	10|22	.|.	.|.	.|.	10|10	.|.	.|.	.|.	.|.	.|.	22|22	.|.	.|.	.|.	.|.	.|.	22|22	.|.	.|.	.|.	.|.	.|.	.|.
chr10:100764053-100764078	.|.	.|.	.|.	.|.	.|.	.|.	.|.	.|.	.|.	.|.	.|.	25|25	.|.	.|.	20|20	.|.	.|.	.|.	.|.	.|.	20|20	.|.	.|.	.|.	.|.	.|.	.|.	.|.	.|.	.|.	20|20	.|.	.|.	.|.	.|.	.|.	.|.	.|.	.|.	.|.	.|.	.|.	.|.	.|.	25|20	.|.	.|.	20|20	.|.
chr10:101272082-101272130	.|.	48|50	.|.	.|.	28|28	.|.	28|28	.|.	.|.	.|.	.|.	.|.	.|.	.|.	.|.	.|.	.|.	.|.	.|.	.|.	.|.	48|50	.|.	.|.	48|50	.|.	.|.	.|.	.|.	.|.	28|28	.|.	.|.	.|.	.|.	.|.	.|.	.|.	.|.	.|.	.|.	28|30	28|28	.|.	48|50	.|.	.|.	.|.	.|.
chr10:101498146-101498184	.|.	.|.	.|.	30|30	28|28	.|.	.|.	.|.	28|42	.|.	.|.	.|.	.|.	.|.	.|.	.|.	.|.	.|.	.|.	.|.	.|.	.|.	40|42	.|.	30|30	.|.	.|.	.|.	40|42	40|40	.|.	.|.	30|30	.|.	.|.	40|40	38|40	42|44	.|.	.|.	.|.	30|30	.|.	.|.	.|.	.|.	.|.	38|40	.|.
chr10:101733046-101733071	.|.	.|.	.|.	.|.	.|.	.|.	.|.	.|.	.|.	.|.	.|.	.|.	.|.	.|.	.|.	.|.	.|.	.|.	.|.	.|.	.|.	.|.	25|25	25|25	.|.	.|.	.|.	.|.	.|.	.|.	.|.	.|.	.|.	.|.	.|.	.|.	.|.	.|.	.|.	.|.	.|.	.|.	25|25	.|.	.|.	.|.	.|.	.|.	.|.
chr10:102027667-102027702	.|.	.|.	40|40	.|.	40|40	.|.	35|35	.|.	.|.	.|.	.|.	.|.	.|.	35|35	.|.	.|.	.|.	.|.	.|.	35|40	.|.	40|40	.|.	.|.	40|40	.|.	40|40	.|.	35|35	.|.	40|40	40|40	.|.	35|35	.|.	40|40	40|40	.|.	40|40	.|.	35|35	40|40	40|40	35|35	40|40	.|.	40|40	35|35	.|.
chr10:102194839-102194883	.|.	.|.	.|.	.|.	.|.	.|.	.|.	.|.	36|40	.|.	.|.	.|.	.|.	.|.	.|.	.|.	.|.	28|28	.|.	28|28	28|28	.|.	.|.	.|.	.|.	28|40	.|.	.|.	.|.	.|.	28|28	.|.	.|.	.|.	.|.	40|40	.|.	40|40	.|.	40|40	.|.	40|40	28|40	.|.	.|.	.|.	.|.	.|.	.|.
chr10:102330278-102330304	.|.	24|24	.|.	.|.	.|.	.|.	26|26	.|.	.|.	.|.	.|.	.|.	.|.	.|.	24|24	24|24	26|26	.|.	.|.	24|24	.|.	26|24	22|24	26|26	.|.	26|24	24|24	.|.	26|26	.|.	24|24	24|24	.|.	24|24	.|.	26|24	26|26	.|.	24|24	.|.	26|24	24|24	.|.	26|26	26|24	.|.	.|.	24|24	.|.
chr10:102404257-102404313	.|.	.|.	.|.	.|.	.|.	.|.	.|.	44|40	.|.	.|.	.|.	.|.	.|.	44|44	.|.	.|.	36|38	.|.	.|.	.|.	.|.	.|.	.|.	.|.	.|.	44|42	44|40	.|.	.|.	.|.	.|.	.|.	.|.	44|42	.|.	.|.	46|42	.|.	44|50	52|42	.|.	.|.	46|42	46|42	48|54	.|.	44|42	.|.	.|.
chr10:102525673-102525703	.|.	.|.	.|.	.|.	.|.	.|.	.|.	.|.	27|27	.|.	.|.	.|.	.|.	.|.	.|.	.|.	.|.	.|.	.|.	30|30	.|.	.|.	.|.	.|.	30|30	.|.	.|.	27|27	27|27	.|.	.|.	.|.	27|27	.|.	.|.	.|.	.|.	.|.	.|.	27|27	27|27	.|.	.|.	.|.	30|30	.|.	.|.	.|.	.|.
chr10:103731310-103731335	.|.	.|.	.|.	.|.	.|.	.|.	25|25	25|25	.|.	.|.	.|.	.|.	.|.	.|.	.|.	.|.	.|.	.|.	25|25	25|25	.|.	.|.	25|25	.|.	25|25	.|.	.|.	.|.	25|25	.|.	25|25	.|.	25|25	.|.	.|.	25|25	25|25	25|25	25|25	25|25	.|.	.|.	25|25	25|25	25|25	.|.	25|25	25|25	25|25
chr10:104064932-104064976	.|.	.|.	.|.	.|.	.|.	.|.	.|.	.|.	.|.	.|.	.|.	.|.	.|.	.|.	.|.	.|.	.|.	.|.	.|.	.|.	.|.	.|.	.|.	.|.	.|.	.|.	.|.	.|.	.|.	.|.	.|.	.|.	.|.	.|.	.|.	.|.	.|.	.|.	.|.	.|.	.|.	.|.	.|.	.|.	.|.	.|.	.|.	.|.	.|.
chr10:10415124-10415164	40|40	40|40	.|.	.|.	.|.	.|.	.|.	.|.	.|.	.|.	40|40	.|.	.|.	40|40	40|40	.|.	.|.	40|40	.|.	40|40	40|40	40|40	.|.	40|40	40|40	40|40	40|40	.|.	40|35	.|.	40|35	40|40	40|40	.|.	40|40	40|40	.|.	.|.	.|.	40|40	40|40	40|40	40|40	.|.	40|50	40|40	40|40	40|40	.|.
chr10:104704338-104704374	.|.	.|.	.|.	.|.	.|.	.|.	.|.	.|.	.|.	.|.	.|.	.|.	.|.	.|.	.|.	.|.	.|.	.|.	.|.	36|38	.|.	.|.	36|38	36|38	.|.	.|.	36|38	.|.	.|.	.|.	.|.	.|.	.|.	.|.	.|.	.|.	.|.	36|34	.|.	.|.	.|.	36|34	.|.	32|34	.|.	.|.	.|.	.|.	.|.
chr10:104722447-104722487	.|.	.|.	.|.	.|.	32|34	.|.	.|.	.|.	.|.	.|.	.|.	32|34	.|.	.|.	.|.	.|.	34|36	.|.	.|.	34|36	32|34	.|.	32|34	.|.	32|34	.|.	34|36	.|.	34|36	34|36	.|.	30|32	32|34	.|.	.|.	32|34	.|.	.|.	34|36	.|.	.|.	34|34	.|.	.|.	.|.	32|34	.|.	32|34	.|.
chr10:105867815-105867855	.|.	.|.	.|.	.|.	.|.	.|.	.|.	.|.	.|.	.|.	.|.	.|.	.|.	.|.	.|.	.|.	.|.	.|.	.|.	.|.	.|.	.|.	.|.	.|.	.|.	.|.	.|.	.|.	.|.	.|.	.|.	.|.	.|.	.|.	.|.	.|.	.|.	.|.	.|.	.|.	34|36	.|.	.|.	.|.	32|34	.|.	.|.	.|.	.|.
chr10:105938913-105938939	.|.	.|.	.|.	.|.	.|.	.|.	.|.	.|.	.|.	.|.	.|.	.|.	.|.	.|.	.|.	.|.	.|.	.|.	.|.	.|.	.|.	.|.	.|.	.|.	.|.	.|.	.|.	.|.	.|.	.|.	.|.	.|.	.|.	.|.	.|.	.|.	.|.	.|.	.|.	.|.	.|.	.|.	.|.	.|.	.|.	.|.	.|.	.|.	.|.
chr10:106809794-106809818	.|.	.|.	.|.	.|.	.|.	.|.	.|.	.|.	.|.	.|.	.|.	.|.	.|.	.|.	.|.	.|.	22|22	.|.	.|.	.|.	.|.	.|.	.|.	.|.	.|.	.|.	.|.	.|.	.|.	.|.	.|.	.|.	.|.	.|.	.|.	.|.	.|.	.|.	.|.	24|24	.|.	.|.	.|.	.|.	.|.	.|.	.|.	.|.	.|.
chr10:106995194-106995228	.|.	.|.	.|.	.|.	.|.	.|.	.|.	.|.	.|.	.|.	.|.	.|.	.|.	.|.	.|.	.|.	.|.	.|.	.|.	.|.	.|.	.|.	.|.	.|.	.|.	.|.	.|.	.|.	.|.	.|.	.|.	.|.	.|.	.|.	.|.	.|.	.|.	.|.	.|.	.|.	.|.	.|.	.|.	.|.	.|.	.|.	.|.	.|.	.|.
chr10:107229450-107229492	.|.	.|.	.|.	40|40	.|.	.|.	.|.	.|.	38|40	.|.	.|.	.|.	.|.	.|.	.|.	.|.	.|.	.|.	.|.	48|50	.|.	.|.	52|40	.|.	.|.	.|.	38|40	48|52	.|.	.|.	48|52	.|.	.|.	.|.	48|50	48|52	42|44	44|50	46|50	.|.	40|48	.|.	46|50	40|44	42|44	.|.	.|.	.|.	.|.
chr10:107325713-107325755	.|.	.|.	.|.	.|.	.|.	.|.	.|.	.|.	.|.	.|.	.|.	.|.	.|.	42|44	.|.	.|.	.|.	.|.	.|.	.|.	.|.	.|.	.|.	.|.	.|.	.|.	.|.	.|.	.|.	.|.	42|42	.|.	.|.	.|.	.|.	.|.	.|.	42|40	.|.	.|.	.|.	.|.	.|.	.|.	.|.	.|.	.|.	.|.	.|.
chr10:107714827-107714863	.|.	30|32	32|32	.|.	.|.	32|34	.|.	.|.	.|.	.|.	.|.	.|.	.|.	.|.	.|.	.|.	.|.	.|.	30|34	30|32	.|.	30|32	.|.	30|32	.|.	.|.	.|.	.|.	.|.	.|.	30|32	.|.	30|32	.|.	.|.	.|.	.|.	.|.	30|34	30|32	.|.	.|.	.|.	.|.	.|.	.|.	.|.	.|.	.|.
chr10:107957959-107957991	.|.	.|.	.|.	.|.	.|.	.|.	.|.	.|.	.|.	.|.	.|.	.|.	.|.	.|.	.|.	.|.	.|.	.|.	.|.	.|.	.|.	.|.	.|.	.|.	.|.	.|.	.|.	34|36	.|.	.|.	34|36	.|.	.|.	.|.	.|.	.|.	.|.	34|36	.|.	.|.	.|.	.|.	.|.	.|.	.|.	.|.	.|.	.|.	.|.
chr10:108014803-108014829	.|.	22|24	22|24	.|.	.|.	.|.	.|.	26|24	.|.	.|.	.|.	.|.	.|.	.|.	.|.	.|.	.|.	.|.	.|.	.|.	.|.	.|.	.|.	.|.	.|.	.|.	.|.	.|.	.|.	.|.	.|.	.|.	.|.	.|.	.|.	.|.	.|.	.|.	.|.	.|.	.|.	.|.	.|.	26|24	.|.	.|.	.|.	.|.	.|.
chr10:108100084-108100122	.|.	.|.	.|.	.|.	29|31	.|.	.|.	.|.	.|.	.|.	.|.	.|.	.|.	.|.	.|.	.|.	.|.	.|.	.|.	.|.	.|.	.|.	.|.	.|.	.|.	.|.	.|.	.|.	.|.	.|.	.|.	.|.	.|.	.|.	.|.	31|31	.|.	.|.	.|.	.|.	.|.	.|.	.|.	.|.	37|39	.|.	.|.	.|.	.|.
chr10:108689531-108689555	.|.	.|.	.|.	.|.	.|.	.|.	.|.	.|.	22|22	22|22	.|.	.|.	.|.	.|.	.|.	20|22	.|.	.|.	24|22	22|22	.|.	20|22	.|.	20|22	.|.	22|22	22|22	20|22	20|22	.|.	22|22	.|.	22|22	.|.	.|.	20|22	.|.	.|.	22|22	.|.	22|22	20|22	22|22	.|.	.|.	.|.	22|22	.|.	.|.
chr10:108861507-108861537	.|.	.|.	.|.	.|.	.|.	.|.	.|.	.|.	.|.	.|.	.|.	.|.	.|.	.|.	.|.	.|.	.|.	.|.	.|.	.|.	.|.	.|.	.|.	30|30	.|.	.|.	24|24	.|.	.|.	.|.	.|.	.|.	.|.	.|.	30|30	.|.	26|28	.|.	.|.	.|.	.|.	.|.	.|.	.|.	24|24	.|.	30|30	.|.	.|.
chr10:109000513-109000553	.|.	40|42	.|.	.|.	.|.	.|.	.|.	.|.	.|.	40|38	.|.	40|42	.|.	.|.	.|.	.|.	.|.	.|.	40|38	40|44	.|.	.|.	40|38	36|38	40|42	.|.	40|42	40|38	36|36	.|.	40|42	.|.	38|42	40|38	40|36	40|42	42|44	40|42	38|42	.|.	40|38	40|42	40|38	.|.	.|.	38|38	42|42	.|.	.|.
chr10:109020156-109020180	24|27	.|.	.|.	.|.	.|.	.|.	.|.	.|.	.|.	.|.	.|.	.|.	.|.	.|.	.|.	.|.	.|.	.|.	.|.	.|.	.|.	.|.	.|.	.|.	27|27	24|27	27|27	.|.	.|.	.|.	.|.	27|27	.|.	.|.	.|.	.|.	.|.	.|.	27|27	.|.	.|.	.|.	.|.	.|.	.|.	.|.	.|.	.|.	.|.
chr10:109021487-109021513	.|.	.|.	.|.	.|.	28|30	.|.	.|.	26|24	.|.	.|.	.|.	.|.	.|.	.|.	.|.	.|.	.|.	.|.	.|.	.|.	.|.	.|.	.|.	.|.	.|.	.|.	.|.	.|.	.|.	.|.	.|.	.|.	.|.	.|.	.|.	.|.	.|.	.|.	.|.	.|.	.|.	.|.	.|.	.|.	.|.	.|.	.|.	.|.	.|.
chr10:109045348-109045408	.|.	.|.	.|.	.|.	.|.	.|.	.|.	.|.	.|.	.|.	.|.	55|55	.|.	50|50	.|.	.|.	.|.	.|.	.|.	.|.	.|.	.|.	.|.	.|.	55|55	.|.	.|.	.|.	.|.	.|.	.|.	55|45	50|45	.|.	.|.	.|.	.|.	.|.	.|.	.|.	.|.	.|.	.|.	.|.	.|.	.|.	.|.	.|.	.|.
chr10:109126472-109126498	.|.	.|.	.|.	.|.	.|.	.|.	.|.	30|32	.|.	.|.	.|.	.|.	.|.	.|.	.|.	.|.	.|.	.|.	.|.	.|.	.|.	.|.	.|.	.|.	.|.	.|.	.|.	.|.	.|.	.|.	.|.	.|.	.|.	.|.	.|.	.|.	.|.	.|.	.|.	.|.	.|.	.|.	.|.	.|.	.|.	.|.	.|.	.|.	.|.
chr10:1091806-1091834	.|.	.|.	.|.	.|.	34|36	.|.	.|.	.|.	24|24	.|.	.|.	.|.	34|36	.|.	.|.	.|.	.|.	.|.	.|.	38|38	.|.	.|.	24|24	36|36	.|.	.|.	.|.	24|24	.|.	.|.	.|.	.|.	.|.	.|.	.|.	.|.	36|38	.|.	.|.	36|38	.|.	.|.	.|.	.|.	.|.	.|.	36|38	34|38	.|.
chr10:109282817-109282841	.|.	.|.	.|.	.|.	.|.	.|.	.|.	.|.	30|30	34|34	.|.	.|.	.|.	.|.	.|.	.|.	.|.	.|.	.|.	.|.	34|34	.|.	.|.	.|.	28|28	.|.	.|.	.|.	.|.	.|.	.|.	.|.	.|.	.|.	.|.	.|.	.|.	.|.	.|.	.|.	.|.	.|.	.|.	.|.	.|.	.|.	.|.	.|.	.|.
chr10:109470479-109470519	44|44	32|44	32|44	44|44	44|44	.|.	.|.	.|.	32|32	32|32	.|.	32|32	.|.	.|.	.|.	32|44	.|.	.|.	.|.	32|44	.|.	44|44	32|44	32|32	32|44	32|32	.|.	32|44	32|32	.|.	32|44	.|.	32|44	32|32	32|44	32|44	.|.	.|.	32|44	44|44	32|44	32|44	32|44	32|32	32|44	32|44	32|44	32|44	32|32
chr10:109563347-109563381	.|.	.|.	.|.	.|.	.|.	.|.	26|26	26|28	.|.	28|28	.|.	.|.	.|.	.|.	26|26	.|.	.|.	.|.	.|.	26|28	.|.	26|26	.|.	.|.	26|26	.|.	.|.	.|.	26|26	.|.	26|26	.|.	.|.	.|.	.|.	.|.	.|.	26|28	.|.	26|28	26|26	28|28	.|.	26|28	.|.	26|26	.|.	.|.	26|26
chr10:109569646-109569676	.|.	.|.	.|.	.|.	.|.	32|34	32|34	.|.	.|.	.|.	.|.	.|.	.|.	.|.	32|34	.|.	.|.	.|.	.|.	30|28	.|.	24|26	.|.	26|34	30|28	.|.	26|26	.|.	26|26	.|.	.|.	.|.	.|.	.|.	.|.	.|.	32|34	32|34	.|.	28|28	.|.	.|.	.|.	32|32	30|30	.|.	.|.	.|.	.|.
chr10:109692842-109692868	.|.	24|24	.|.	22|22	.|.	24|24	22|22	24|24	.|.	.|.	.|.	24|24	22|22	.|.	.|.	24|24	.|.	20|22	.|.	22|24	24|24	24|24	22|24	22|24	24|24	22|22	22|24	22|22	22|24	.|.	24|24	.|.	22|24	.|.	.|.	22|24	24|24	24|24	24|24	24|24	24|24	22|24	24|24	.|.	24|24	24|24	24|24	24|24	20|20
chr10:110050650-110050675	.|.	.|.	25|25	25|25	.|.	.|.	25|25	.|.	.|.	25|25	.|.	25|25	25|25	.|.	.|.	.|.	25|25	.|.	.|.	25|25	25|25	25|25	.|.	.|.	25|25	25|25	25|25	.|.	.|.	25|25	25|25	.|.	25|25	.|.	25|25	25|25	25|25	.|.	25|25	25|25	25|25	25|25	25|25	25|25	25|25	.|.	25|25	25|25	25|25
chr10:110192362-110192420	.|.	.|.	.|.	.|.	.|.	.|.	.|.	.|.	.|.	.|.	.|.	.|.	38|38	.|.	.|.	.|.	.|.	.|.	.|.	.|.	.|.	.|.	40|42	.|.	.|.	.|.	40|42	.|.	.|.	.|.	.|.	.|.	.|.	.|.	.|.	.|.	.|.	.|.	.|.	.|.	42|48	.|.	.|.	.|.	.|.	.|.	.|.	.|.	.|.
chr10:110536976-110537014	.|.	32|36	.|.	.|.	.|.	.|.	.|.	.|.	.|.	.|.	.|.	32|32	.|.	32|32	.|.	32|32	.|.	.|.	.|.	36|36	32|32	.|.	.|.	.|.	.|.	32|34	42|44	34|34	.|.	34|34	38|40	.|.	.|.	30|44	40|42	38|42	42|42	.|.	30|42	.|.	34|40	.|.	.|.	34|34	34|34	32|34	.|.	34|34	.|.
chr10:111194535-111194559	.|.	.|.	.|.	.|.	.|.	.|.	.|.	.|.	.|.	.|.	24|24	.|.	.|.	.|.	.|.	.|.	.|.	.|.	.|.	24|24	24|24	.|.	.|.	.|.	23|23	.|.	.|.	.|.	.|.	.|.	.|.	.|.	24|24	.|.	.|.	.|.	.|.	.|.	.|.	.|.	.|.	.|.	.|.	.|.	24|24	.|.	.|.	.|.	.|.
chr10:11190806-11190836	.|.	.|.	.|.	46|46	32|48	.|.	.|.	.|.	48|50	.|.	.|.	.|.	.|.	.|.	.|.	.|.	30|32	.|.	.|.	.|.	.|.	.|.	.|.	46|48	32|46	.|.	.|.	.|.	44|46	.|.	30|30	.|.	.|.	.|.	.|.	.|.	.|.	.|.	.|.	.|.	.|.	.|.	44|46	.|.	.|.	.|.	.|.	46|46	.|.
chr10:112831271-112831299	.|.	.|.	.|.	.|.	32|32	.|.	.|.	32|32	28|28	.|.	.|.	28|28	.|.	.|.	.|.	.|.	26|26	.|.	.|.	.|.	.|.	.|.	28|28	.|.	28|28	.|.	28|28	28|28	28|28	.|.	28|28	28|28	28|32	.|.	.|.	.|.	.|.	28|28	28|32	28|28	28|28	32|32	.|.	.|.	.|.	.|.	.|.	28|28	.|.
chr10:113140147-113140179	.|.	26|26	24|24	.|.	26|26	24|24	24|24	24|24	.|.	24|24	.|.	.|.	.|.	24|24	24|24	.|.	.|.	.|.	24|24	24|24	.|.	.|.	26|24	26|26	24|22	26|26	24|22	24|24	26|24	26|26	.|.	.|.	24|24	26|20	.|.	.|.	24|22	26|24	.|.	24|24	24|24	.|.	26|24	26|24	26|26	26|24	24|24	26|26	26|26
chr10:113392572-113392608	.|.	.|.	.|.	.|.	.|.	.|.	.|.	.|.	.|.	.|.	28|28	28|28	.|.	28|28	28|28	.|.	.|.	.|.	28|28	.|.	.|.	28|28	28|28	.|.	.|.	.|.	.|.	28|28	28|28	.|.	.|.	.|.	.|.	.|.	.|.	.|.	.|.	.|.	28|28	.|.	.|.	28|28	.|.	.|.	.|.	28|28	.|.	.|.	.|.
chr10:113484588-113484614	30|30	.|.	.|.	.|.	.|.	.|.	.|.	30|30	.|.	30|30	28|30	.|.	.|.	.|.	.|.	30|30	.|.	.|.	.|.	26|30	.|.	26|26	24|30	.|.	.|.	26|30	.|.	26|30	.|.	.|.	26|26	.|.	26|26	.|.	.|.	.|.	30|30	30|30	.|.	.|.	26|26	30|30	.|.	30|30	.|.	.|.	26|26	30|30	30|30
chr10:113759414-113759446	.|.	38|40	28|28	.|.	.|.	.|.	.|.	.|.	.|.	.|.	.|.	.|.	.|.	.|.	.|.	.|.	.|.	.|.	.|.	32|32	.|.	.|.	.|.	.|.	.|.	28|40	28|40	.|.	.|.	.|.	36|40	.|.	.|.	.|.	.|.	28|30	.|.	.|.	.|.	.|.	.|.	.|.	32|32	.|.	28|28	.|.	.|.	.|.	.|.
chr10:114026022-114026056	.|.	.|.	.|.	.|.	.|.	.|.	.|.	26|28	.|.	.|.	.|.	.|.	.|.	.|.	.|.	.|.	.|.	.|.	.|.	.|.	.|.	.|.	.|.	.|.	.|.	.|.	.|.	.|.	.|.	.|.	.|.	.|.	.|.	.|.	.|.	.|.	.|.	.|.	.|.	.|.	.|.	.|.	.|.	.|.	.|.	.|.	.|.	.|.	.|.
chr10:114290822-114290862	.|.	.|.	.|.	44|44	.|.	44|44	.|.	.|.	.|.	44|44	.|.	.|.	.|.	.|.	.|.	.|.	.|.	46|46	.|.	.|.	.|.	.|.	.|.	.|.	.|.	.|.	.|.	44|46	.|.	.|.	46|46	.|.	.|.	44|46	.|.	46|46	.|.	.|.	.|.	.|.	.|.	.|.	.|.	52|54	.|.	.|.	52|52	.|.	46|46
chr10:114457625-114457665	.|.	40|36	.|.	.|.	.|.	.|.	.|.	.|.	.|.	.|.	.|.	.|.	40|42	.|.	.|.	.|.	.|.	.|.	.|.	40|38	.|.	.|.	38|40	.|.	.|.	40|38	.|.	.|.	.|.	.|.	.|.	.|.	40|38	.|.	.|.	.|.	.|.	.|.	40|38	.|.	.|.	.|.	.|.	.|.	.|.	.|.	.|.	.|.	.|.
chr10:114521529-114521557	.|.	.|.	.|.	.|.	.|.	.|.	.|.	.|.	.|.	.|.	.|.	.|.	.|.	.|.	.|.	.|.	.|.	.|.	.|.	.|.	.|.	.|.	.|.	.|.	.|.	.|.	.|.	30|32	.|.	.|.	.|.	.|.	28|30	.|.	.|.	32|32	.|.	30|32	.|.	30|30	30|32	.|.	.|.	.|.	.|.	28|30	.|.	.|.	.|.
chr10:114684316-114684344	36|38	.|.	.|.	.|.	.|.	.|.	.|.	.|.	.|.	.|.	.|.	.|.	.|.	.|.	.|.	.|.	.|.	.|.	.|.	.|.	.|.	.|.	.|.	.|.	.|.	.|.	.|.	.|.	.|.	.|.	.|.	.|.	.|.	.|.	.|.	.|.	.|.	.|.	.|.	38|40	.|.	.|.	.|.	.|.	.|.	.|.	.|.	.|.	.|.
chr10:114745619-114745651	.|.	32|34	.|.	32|34	32|34	.|.	.|.	.|.	42|44	.|.	36|38	42|46	.|.	.|.	.|.	.|.	.|.	.|.	.|.	34|42	.|.	.|.	40|42	.|.	.|.	32|32	32|34	.|.	32|40	.|.	34|38	.|.	36|38	34|38	.|.	36|38	.|.	40|42	36|38	.|.	32|34	.|.	40|42	36|36	.|.	34|40	34|38	.|.	.|.
chr10:115602782-115602826	.|.	.|.	.|.	.|.	.|.	.|.	.|.	.|.	.|.	.|.	.|.	.|.	.|.	.|.	.|.	.|.	.|.	.|.	.|.	.|.	.|.	32|32	.|.	.|.	.|.	.|.	.|.	.|.	.|.	.|.	.|.	.|.	.|.	.|.	.|.	.|.	.|.	.|.	.|.	.|.	46|48	.|.	.|.	.|.	.|.	.|.	.|.	.|.	.|.
chr10:115627494-115627524	.|.	30|30	.|.	.|.	.|.	30|30	30|30	.|.	.|.	30|30	30|30	.|.	30|30	.|.	.|.	30|30	.|.	30|30	30|30	30|30	.|.	.|.	.|.	.|.	30|30	30|30	30|30	.|.	30|30	30|30	30|30	.|.	30|30	30|30	.|.	.|.	30|30	30|30	30|30	30|30	30|30	.|.	.|.	30|30	30|30	30|30	30|30	.|.	30|30
chr10:116128526-116128574	.|.	.|.	.|.	.|.	42|42	.|.	.|.	44|46	.|.	.|.	.|.	.|.	.|.	.|.	.|.	44|46	38|42	.|.	42|44	44|50	.|.	42|46	.|.	.|.	.|.	46|46	.|.	42|44	44|46	.|.	48|46	.|.	.|.	.|.	.|.	40|42	.|.	.|.	.|.	.|.	.|.	.|.	.|.	.|.	.|.	.|.	.|.	.|.	.|.
chr10:117239717-117239745	.|.	32|34	.|.	.|.	.|.	.|.	28|30	.|.	.|.	.|.	.|.	.|.	.|.	.|.	.|.	.|.	.|.	.|.	.|.	.|.	.|.	.|.	.|.	.|.	.|.	.|.	30|30	.|.	.|.	.|.	.|.	.|.	.|.	.|.	.|.	.|.	.|.	.|.	.|.	.|.	.|.	.|.	.|.	.|.	.|.	.|.	.|.	.|.	.|.
chr10:117532108-117532142	.|.	.|.	.|.	.|.	.|.	.|.	.|.	.|.	.|.	.|.	.|.	.|.	.|.	.|.	.|.	.|.	.|.	.|.	.|.	.|.	.|.	.|.	.|.	.|.	.|.	36|38	.|.	.|.	.|.	.|.	.|.	.|.	.|.	.|.	.|.	.|.	.|.	.|.	36|38	36|38	.|.	.|.	.|.	.|.	.|.	.|.	.|.	34|36	.|.
chr10:117561532-117561556	.|.	.|.	.|.	.|.	.|.	.|.	.|.	.|.	.|.	.|.	.|.	.|.	.|.	.|.	.|.	.|.	.|.	.|.	.|.	.|.	.|.	.|.	.|.	.|.	.|.	.|.	.|.	.|.	.|.	.|.	.|.	.|.	.|.	.|.	.|.	.|.	.|.	.|.	.|.	.|.	.|.	.|.	.|.	.|.	.|.	.|.	.|.	.|.	.|.
chr10:117656631-117656655	.|.	.|.	.|.	.|.	.|.	.|.	.|.	.|.	.|.	24|24	.|.	24|24	.|.	.|.	.|.	.|.	.|.	.|.	.|.	.|.	.|.	.|.	.|.	.|.	.|.	.|.	24|24	.|.	.|.	.|.	.|.	24|24	.|.	.|.	.|.	.|.	.|.	.|.	24|24	.|.	.|.	.|.	.|.	.|.	24|20	.|.	.|.	.|.	.|.
chr10:117965438-117965482	.|.	.|.	.|.	.|.	.|.	.|.	.|.	34|36	.|.	.|.	.|.	.|.	.|.	.|.	.|.	.|.	.|.	.|.	.|.	.|.	.|.	.|.	.|.	.|.	.|.	.|.	.|.	.|.	.|.	.|.	.|.	.|.	.|.	.|.	.|.	.|.	.|.	.|.	.|.	.|.	.|.	.|.	.|.	.|.	.|.	.|.	.|.	.|.	.|.
chr10:118319788-118319820	.|.	.|.	.|.	.|.	.|.	.|.	.|.	.|.	.|.	.|.	.|.	.|.	.|.	.|.	.|.	.|.	32|30	.|.	.|.	.|.	.|.	.|.	.|.	.|.	30|30	.|.	.|.	.|.	.|.	.|.	.|.	.|.	32|30	.|.	.|.	.|.	.|.	.|.	.|.	.|.	.|.	.|.	.|.	.|.	.|.	.|.	.|.	.|.	.|.
chr10:118889158-118889188	.|.	.|.	.|.	.|.	.|.	36|36	.|.	.|.	.|.	34|34	.|.	.|.	.|.	.|.	.|.	32|34	.|.	32|34	.|.	.|.	.|.	.|.	.|.	.|.	.|.	.|.	.|.	.|.	.|.	.|.	.|.	.|.	.|.	.|.	.|.	34|36	.|.	.|.	.|.	.|.	.|.	.|.	.|.	.|.	.|.	.|.	.|.	.|.	.|.
chr10:119078903-119078945	38|40	.|.	.|.	.|.	.|.	.|.	.|.	.|.	38|40	.|.	.|.	.|.	.|.	.|.	.|.	.|.	.|.	.|.	.|.	.|.	36|40	.|.	36|36	36|38	.|.	36|36	.|.	.|.	36|38	.|.	.|.	.|.	.|.	.|.	.|.	.|.	.|.	.|.	.|.	.|.	.|.	.|.	.|.	.|.	.|.	.|.	.|.	.|.	.|.
chr10:119101904-119101938	32|34	.|.	28|30	.|.	.|.	.|.	.|.	.|.	32|34	.|.	.|.	.|.	.|.	.|.	.|.	28|30	.|.	.|.	.|.	.|.	.|.	.|.	.|.	32|34	28|30	.|.	30|34	.|.	32|34	.|.	30|34	32|34	32|34	32|34	28|30	34|36	28|30	.|.	28|30	.|.	34|36	.|.	.|.	32|34	.|.	.|.	32|34	34|36	.|.
chr10:119414185-119414221	.|.	.|.	.|.	.|.	.|.	.|.	.|.	.|.	.|.	.|.	.|.	.|.	.|.	.|.	.|.	.|.	.|.	.|.	.|.	.|.	.|.	.|.	.|.	.|.	.|.	.|.	.|.	.|.	.|.	.|.	.|.	.|.	.|.	.|.	.|.	.|.	.|.	.|.	.|.	.|.	.|.	.|.	.|.	.|.	.|.	.|.	.|.	.|.	.|.
chr10:119998732-119998768	.|.	.|.	.|.	.|.	.|.	.|.	.|.	.|.	.|.	.|.	.|.	.|.	16|16	.|.	.|.	.|.	.|.	.|.	.|.	.|.	.|.	.|.	.|.	.|.	.|.	16|16	.|.	.|.	.|.	.|.	.|.	.|.	.|.	.|.	.|.	.|.	.|.	.|.	.|.	.|.	.|.	.|.	.|.	16|16	.|.	.|.	.|.	16|16	.|.
chr10:120260159-120260199	32|32	.|.	.|.	.|.	.|.	.|.	.|.	.|.	.|.	.|.	.|.	.|.	.|.	.|.	.|.	.|.	.|.	.|.	32|32	.|.	.|.	.|.	.|.	.|.	32|48	.|.	.|.	.|.	.|.	.|.	.|.	.|.	.|.	.|.	.|.	.|.	.|.	32|32	.|.	.|.	.|.	.|.	.|.	.|.	.|.	.|.	.|.	.|.	.|.
chr10:121352275-121352299	.|.	.|.	.|.	.|.	.|.	.|.	.|.	.|.	.|.	.|.	.|.	.|.	.|.	.|.	.|.	.|.	.|.	.|.	.|.	.|.	.|.	.|.	.|.	.|.	.|.	.|.	.|.	24|24	.|.	.|.	.|.	.|.	.|.	.|.	.|.	.|.	.|.	.|.	.|.	.|.	.|.	.|.	.|.	.|.	.|.	.|.	.|.	.|.	.|.
chr10:12154499-12154529	.|.	.|.	.|.	.|.	.|.	.|.	.|.	.|.	.|.	.|.	.|.	.|.	.|.	.|.	.|.	.|.	.|.	.|.	.|.	.|.	.|.	.|.	24|24	.|.	.|.	.|.	.|.	.|.	.|.	.|.	.|.	24|24	.|.	.|.	.|.	.|.	.|.	.|.	.|.	.|.	.|.	.|.	.|.	.|.	.|.	.|.	.|.	.|.	.|.
chr10:122644798-122644822	.|.	.|.	.|.	.|.	.|.	.|.	.|.	.|.	.|.	.|.	.|.	.|.	22|22	.|.	.|.	24|22	.|.	.|.	.|.	.|.	.|.	.|.	.|.	.|.	.|.	.|.	.|.	.|.	.|.	.|.	.|.	.|.	.|.	.|.	.|.	.|.	.|.	.|.	.|.	.|.	.|.	.|.	.|.	.|.	.|.	.|.	.|.	.|.	.|.
chr10:123203050-123203078	34|34	44|46	.|.	.|.	.|.	.|.	.|.	42|46	.|.	.|.	.|.	.|.	.|.	.|.	34|36	.|.	.|.	.|.	.|.	36|46	.|.	.|.	42|42	38|44	.|.	42|46	.|.	.|.	.|.	.|.	34|36	28|36	34|36	.|.	.|.	36|46	34|44	34|36	36|46	34|36	32|36	.|.	.|.	.|.	34|36	.|.	34|34	.|.	.|.
chr10:123315910-123315948	.|.	28|30	.|.	.|.	.|.	26|26	.|.	.|.	24|24	.|.	.|.	.|.	26|26	.|.	28|28	26|26	.|.	.|.	.|.	28|28	24|26	.|.	26|26	28|28	28|28	26|26	26|26	26|26	26|26	.|.	.|.	.|.	26|26	.|.	26|26	28|28	26|26	26|26	26|28	26|28	26|28	26|28	26|28	24|26	.|.	26|28	28|28	26|26	.|.
chr10:123779827-123779853	.|.	28|30	.|.	.|.	26|28	.|.	.|.	.|.	.|.	.|.	.|.	.|.	.|.	.|.	.|.	.|.	.|.	.|.	.|.	.|.	.|.	.|.	26|28	28|32	.|.	26|28	26|28	.|.	.|.	.|.	28|30	.|.	.|.	.|.	.|.	.|.	.|.	.|.	28|30	.|.	.|.	.|.	.|.	.|.	.|.	.|.	.|.	.|.	.|.
chr10:124158109-124158137	.|.	.|.	32|32	.|.	.|.	.|.	.|.	.|.	.|.	.|.	.|.	.|.	.|.	.|.	.|.	.|.	.|.	.|.	.|.	.|.	.|.	.|.	.|.	.|.	.|.	.|.	.|.	.|.	.|.	.|.	.|.	.|.	.|.	.|.	.|.	.|.	30|32	.|.	32|32	.|.	.|.	.|.	30|30	.|.	.|.	.|.	.|.	.|.	.|.
chr10:124874166-124874210	44|48	40|40	.|.	.|.	.|.	.|.	.|.	.|.	38|38	38|38	.|.	.|.	46|50	.|.	.|.	.|.	.|.	.|.	.|.	38|40	.|.	.|.	.|.	36|38	48|52	36|40	.|.	.|.	.|.	.|.	36|40	.|.	36|50	.|.	.|.	.|.	38|38	.|.	40|50	.|.	36|40	36|40	36|40	.|.	.|.	46|50	.|.	42|50	.|.
chr10:125370556-125370580	.|.	24|24	24|24	24|24	.|.	24|24	24|24	.|.	.|.	.|.	.|.	.|.	.|.	.|.	.|.	.|.	24|24	.|.	.|.	24|24	.|.	24|24	.|.	.|.	24|24	.|.	.|.	.|.	24|24	.|.	24|24	.|.	.|.	.|.	.|.	24|24	24|24	.|.	24|24	24|24	24|24	.|.	24|24	.|.	24|24	.|.	24|24	24|24	24|24
chr10:125421951-125421979	.|.	.|.	.|.	.|.	28|26	.|.	28|26	.|.	.|.	.|.	.|.	.|.	.|.	.|.	.|.	.|.	.|.	.|.	.|.	.|.	.|.	.|.	.|.	28|30	28|28	.|.	.|.	28|26	.|.	.|.	28|28	.|.	.|.	.|.	.|.	.|.	.|.	.|.	.|.	28|30	.|.	30|30	.|.	28|28	.|.	.|.	.|.	.|.	.|.
chr10:126020631-126020669	.|.	.|.	.|.	.|.	.|.	.|.	40|40	.|.	.|.	.|.	.|.	.|.	.|.	.|.	.|.	.|.	.|.	.|.	.|.	.|.	.|.	32|34	.|.	.|.	.|.	.|.	.|.	.|.	.|.	.|.	40|40	.|.	.|.	.|.	.|.	.|.	.|.	.|.	.|.	.|.	.|.	.|.	.|.	.|.	.|.	.|.	.|.	.|.	.|.
chr10:12725740-12725782	.|.	.|.	.|.	.|.	.|.	.|.	.|.	.|.	.|.	.|.	.|.	.|.	.|.	.|.	.|.	.|.	.|.	.|.	.|.	.|.	.|.	.|.	.|.	.|.	.|.	.|.	.|.	.|.	.|.	.|.	.|.	.|.	.|.	42|44	.|.	.|.	42|44	.|.	.|.	.|.	.|.	.|.	.|.	.|.	.|.	.|.	.|.	.|.	.|.
chr10:127381342-127381370	24|26	.|.	.|.	.|.	.|.	.|.	.|.	.|.	.|.	.|.	.|.	.|.	.|.	.|.	.|.	.|.	.|.	.|.	.|.	.|.	.|.	24|26	.|.	.|.	24|26	24|26	.|.	.|.	.|.	.|.	24|26	26|26	24|26	.|.	.|.	.|.	24|26	.|.	.|.	.|.	26|26	.|.	.|.	.|.	.|.	.|.	.|.	24|26	.|.
chr10:127641369-127641429	.|.	.|.	.|.	.|.	.|.	32|32	44|48	42|48	.|.	46|48	.|.	.|.	42|42	.|.	.|.	.|.	42|42	.|.	.|.	42|48	.|.	32|42	.|.	.|.	.|.	32|32	.|.	32|48	32|42	.|.	.|.	.|.	32|34	44|46	.|.	.|.	.|.	.|.	46|46	.|.	40|42	44|48	46|46	.|.	42|44	.|.	32|46	42|48	30|32
chr10:127901115-127901140	.|.	.|.	.|.	25|25	.|.	.|.	.|.	.|.	.|.	.|.	.|.	.|.	.|.	.|.	.|.	.|.	25|25	.|.	.|.	.|.	.|.	.|.	.|.	.|.	.|.	.|.	.|.	.|.	.|.	.|.	.|.	.|.	25|25	.|.	.|.	.|.	.|.	.|.	25|25	.|.	.|.	.|.	.|.	.|.	.|.	.|.	.|.	.|.	.|.
chr10:127992887-127992911	.|.	.|.	.|.	.|.	.|.	.|.	.|.	.|.	.|.	.|.	.|.	.|.	.|.	.|.	.|.	.|.	28|28	28|28	.|.	.|.	.|.	.|.	28|28	.|.	28|28	.|.	28|28	.|.	.|.	.|.	.|.	.|.	.|.	.|.	.|.	.|.	.|.	.|.	.|.	.|.	.|.	.|.	.|.	.|.	.|.	.|.	.|.	.|.	.|.
chr10:128131202-128131246	.|.	12|12	.|.	.|.	12|12	.|.	12|12	.|.	.|.	.|.	.|.	.|.	.|.	.|.	.|.	12|12	.|.	.|.	.|.	12|12	.|.	.|.	.|.	12|12	.|.	.|.	.|.	.|.	.|.	12|12	12|12	.|.	.|.	12|12	.|.	12|12	.|.	12|12	12|12	12|12	12|12	12|12	.|.	12|12	12|12	12|12	12|12	12|12	12|12
chr10:128497038-128497076	26|44	26|26	.|.	22|24	24|42	24|24	.|.	24|24	.|.	24|44	42|44	26|44	.|.	24|24	26|26	42|44	.|.	.|.	.|.	26|44	24|24	24|44	26|26	24|24	26|42	24|26	24|42	26|44	26|26	.|.	26|44	.|.	.|.	.|.	26|26	26|44	24|46	26|20	26|26	26|46	24|44	26|42	24|46	24|42	42|44	26|26	26|26	.|.	26|42
chr10:129515397-129515421	24|30	30|30	30|30	30|30	.|.	.|.	.|.	.|.	.|.	30|30	.|.	.|.	.|.	.|.	.|.	.|.	.|.	.|.	.|.	30|30	.|.	.|.	30|30	.|.	30|30	30|30	.|.	.|.	30|30	30|30	.|.	.|.	30|30	.|.	.|.	30|30	30|30	30|30	30|30	30|30	.|.	.|.	.|.	.|.	30|30	30|30	30|30	.|.	30|30
chr10:130178631-130178657	.|.	.|.	.|.	.|.	.|.	26|28	22|22	.|.	.|.	.|.	.|.	.|.	.|.	.|.	.|.	22|22	.|.	.|.	.|.	.|.	26|26	.|.	.|.	.|.	26|26	.|.	.|.	26|28	.|.	.|.	.|.	.|.	.|.	.|.	.|.	.|.	.|.	.|.	.|.	.|.	.|.	.|.	.|.	.|.	.|.	.|.	.|.	.|.	.|.
chr10:130340171-130340203	.|.	.|.	.|.	36|38	.|.	.|.	.|.	36|36	.|.	.|.	.|.	.|.	.|.	.|.	.|.	.|.	.|.	.|.	.|.	36|36	.|.	.|.	.|.	.|.	36|38	38|38	.|.	.|.	36|36	.|.	36|36	.|.	.|.	.|.	.|.	.|.	.|.	32|34	.|.	.|.	34|36	.|.	.|.	.|.	34|34	.|.	.|.	34|36	.|.
chr10:130593224-130593264	36|36	36|36	36|36	36|36	36|36	36|36	36|36	36|36	.|.	36|36	.|.	36|36	.|.	.|.	36|36	.|.	.|.	.|.	.|.	36|36	36|36	.|.	.|.	36|36	.|.	36|36	36|36	.|.	.|.	36|36	.|.	.|.	36|36	.|.	.|.	36|36	36|36	.|.	36|36	.|.	36|36	36|36	36|36	.|.	.|.	.|.	.|.	36|36	.|.
chr10:130689353-130689395	.|.	.|.	.|.	.|.	.|.	.|.	.|.	.|.	.|.	.|.	20|22	.|.	.|.	.|.	.|.	.|.	.|.	.|.	.|.	.|.	24|22	.|.	.|.	.|.	.|.	.|.	.|.	.|.	.|.	.|.	.|.	.|.	.|.	.|.	.|.	.|.	.|.	.|.	.|.	.|.	.|.	.|.	.|.	.|.	.|.	.|.	.|.	.|.	.|.
chr10:130822070-130822110	.|.	28|30	28|30	.|.	40|36	28|30	26|30	.|.	.|.	.|.	.|.	34|36	.|.	.|.	.|.	36|38	.|.	.|.	.|.	26|26	.|.	36|38	.|.	.|.	.|.	.|.	28|30	24|26	26|30	.|.	.|.	.|.	24|26	.|.	.|.	.|.	.|.	.|.	.|.	.|.	26|36	.|.	.|.	26|26	.|.	26|28	.|.	.|.	.|.
chr10:130989726-130989756	30|30	30|30	.|.	.|.	.|.	.|.	.|.	.|.	30|30	.|.	.|.	.|.	30|30	.|.	.|.	.|.	.|.	.|.	.|.	.|.	.|.	.|.	.|.	.|.	.|.	30|30	.|.	30|30	.|.	.|.	.|.	.|.	.|.	.|.	.|.	30|30	.|.	.|.	.|.	.|.	.|.	.|.	.|.	.|.	.|.	.|.	30|30	.|.	.|.
chr10:131092507-131092559	.|.	.|.	.|.	.|.	.|.	.|.	.|.	.|.	.|.	.|.	.|.	.|.	.|.	.|.	.|.	.|.	.|.	.|.	60|60	.|.	.|.	.|.	60|60	.|.	.|.	.|.	.|.	.|.	.|.	.|.	.|.	.|.	.|.	.|.	.|.	.|.	.|.	.|.	.|.	.|.	.|.	.|.	.|.	.|.	.|.	.|.	.|.	.|.	.|.
chr10:131897774-131897814	.|.	.|.	.|.	.|.	24|24	.|.	.|.	.|.	.|.	.|.	.|.	.|.	.|.	.|.	.|.	.|.	.|.	.|.	.|.	.|.	.|.	.|.	24|24	.|.	.|.	.|.	.|.	.|.	.|.	.|.	.|.	.|.	.|.	.|.	.|.	.|.	.|.	.|.	.|.	.|.	.|.	.|.	.|.	.|.	.|.	.|.	.|.	.|.	.|.
chr10:13203891-13203915	.|.	20|20	.|.	.|.	20|20	.|.	24|24	.|.	.|.	20|20	.|.	20|20	24|24	20|20	24|24	.|.	.|.	.|.	.|.	20|20	24|24	.|.	.|.	24|24	24|24	20|20	.|.	24|20	24|24	.|.	.|.	.|.	24|24	.|.	.|.	24|24	24|24	24|20	24|24	.|.	20|20	24|24	20|20	20|20	20|20	24|20	20|20	24|20	24|24
chr10:13645294-13645321	.|.	.|.	.|.	.|.	.|.	.|.	.|.	.|.	.|.	.|.	.|.	.|.	.|.	.|.	.|.	.|.	.|.	.|.	.|.	.|.	.|.	.|.	.|.	.|.	.|.	.|.	.|.	27|27	.|.	.|.	.|.	.|.	.|.	.|.	.|.	.|.	.|.	.|.	.|.	.|.	.|.	.|.	.|.	.|.	.|.	.|.	.|.	.|.	.|.
chr10:1379257-1379287	.|.	.|.	.|.	.|.	.|.	.|.	.|.	.|.	.|.	.|.	.|.	.|.	.|.	.|.	.|.	.|.	.|.	.|.	.|.	.|.	32|32	.|.	.|.	.|.	.|.	.|.	.|.	.|.	.|.	.|.	32|34	.|.	.|.	.|.	.|.	.|.	.|.	.|.	.|.	.|.	.|.	.|.	.|.	.|.	.|.	.|.	.|.	.|.	.|.
chr10:13796567-13796601	.|.	.|.	.|.	.|.	.|.	.|.	.|.	.|.	.|.	.|.	.|.	.|.	.|.	.|.	.|.	.|.	.|.	.|.	.|.	.|.	.|.	.|.	.|.	.|.	36|38	.|.	.|.	.|.	.|.	.|.	.|.	.|.	.|.	.|.	.|.	.|.	.|.	34|34	.|.	.|.	.|.	.|.	.|.	.|.	.|.	.|.	.|.	.|.	.|.
chr10:14559707-14559749	.|.	.|.	22|22	.|.	20|22	.|.	22|22	.|.	20|22	.|.	.|.	.|.	.|.	.|.	.|.	22|40	.|.	.|.	.|.	.|.	.|.	.|.	22|22	22|22	20|22	22|22	22|18	.|.	.|.	.|.	20|22	.|.	.|.	.|.	.|.	.|.	22|22	20|22	20|22	22|22	22|22	.|.	.|.	.|.	.|.	.|.	22|22	22|22	.|.
chr10:14746268-14746298	.|.	.|.	.|.	.|.	.|.	.|.	.|.	.|.	.|.	.|.	.|.	.|.	.|.	.|.	.|.	.|.	.|.	.|.	38|40	.|.	.|.	.|.	28|28	.|.	.|.	.|.	.|.	.|.	.|.	.|.	.|.	.|.	.|.	.|.	.|.	.|.	.|.	.|.	.|.	.|.	.|.	.|.	.|.	38|40	.|.	.|.	.|.	.|.	.|.
chr10:14911231-14911263	24|24	24|24	24|24	.|.	24|24	.|.	.|.	24|24	.|.	24|30	.|.	30|30	.|.	24|24	22|30	.|.	24|24	.|.	.|.	24|30	.|.	24|20	.|.	24|30	24|30	.|.	28|30	24|24	24|24	.|.	30|30	24|24	24|30	24|24	30|30	24|30	24|24	30|30	24|30	24|30	24|30	24|30	24|30	24|24	24|30	24|30	24|30	24|30	24|24
chr10:16020757-16020797	.|.	.|.	.|.	.|.	.|.	.|.	.|.	.|.	.|.	.|.	.|.	.|.	.|.	.|.	.|.	.|.	.|.	.|.	.|.	.|.	.|.	.|.	.|.	.|.	.|.	.|.	.|.	.|.	.|.	.|.	.|.	.|.	42|42	.|.	.|.	.|.	28|28	40|42	.|.	.|.	.|.	.|.	28|28	40|42	.|.	.|.	.|.	.|.	.|.
chr10:16040911-16040959	.|.	.|.	.|.	.|.	.|.	.|.	.|.	.|.	.|.	34|36	.|.	.|.	.|.	.|.	.|.	.|.	.|.	.|.	.|.	34|36	.|.	.|.	.|.	.|.	.|.	.|.	.|.	32|36	26|26	.|.	.|.	.|.	.|.	.|.	.|.	36|24	.|.	.|.	.|.	.|.	.|.	.|.	.|.	.|.	.|.	.|.	.|.	.|.	.|.
chr10:16724534-16724570	.|.	.|.	48|50	.|.	.|.	.|.	.|.	.|.	.|.	.|.	36|32	.|.	.|.	.|.	34|34	.|.	.|.	.|.	.|.	.|.	46|48	.|.	.|.	.|.	36|34	.|.	.|.	.|.	44|46	.|.	36|34	.|.	.|.	.|.	.|.	.|.	36|34	36|36	.|.	.|.	48|50	46|50	.|.	.|.	36|34	.|.	.|.	36|36	.|.
chr10:17150380-17150406	.|.	.|.	.|.	.|.	.|.	.|.	.|.	.|.	.|.	.|.	.|.	.|.	.|.	.|.	.|.	.|.	.|.	.|.	.|.	.|.	.|.	.|.	.|.	.|.	20|20	.|.	.|.	.|.	.|.	20|20	.|.	.|.	.|.	.|.	.|.	.|.	.|.	.|.	.|.	.|.	.|.	.|.	.|.	.|.	.|.	.|.	.|.	.|.	.|.
chr10:17228048-17228088	.|.	.|.	.|.	.|.	.|.	.|.	.|.	.|.	.|.	.|.	.|.	.|.	.|.	.|.	.|.	.|.	.|.	.|.	.|.	.|.	.|.	.|.	.|.	.|.	.|.	44|48	.|.	.|.	.|.	.|.	.|.	.|.	.|.	.|.	48|48	48|48	.|.	.|.	.|.	.|.	.|.	.|.	.|.	.|.	.|.	.|.	.|.	.|.	.|.
chr10:17403516-17403550	.|.	.|.	.|.	.|.	.|.	.|.	.|.	.|.	.|.	.|.	.|.	.|.	.|.	.|.	.|.	.|.	.|.	.|.	.|.	.|.	.|.	.|.	.|.	.|.	.|.	.|.	.|.	.|.	.|.	28|32	.|.	.|.	.|.	.|.	.|.	.|.	.|.	.|.	.|.	.|.	.|.	.|.	.|.	.|.	.|.	.|.	.|.	.|.	.|.
chr10:17624502-17624544	.|.	.|.	.|.	.|.	.|.	.|.	.|.	.|.	.|.	.|.	.|.	.|.	.|.	.|.	30|30	30|30	.|.	.|.	.|.	28|28	.|.	.|.	.|.	28|30	.|.	.|.	28|30	28|28	28|28	.|.	.|.	28|28	.|.	.|.	.|.	.|.	.|.	.|.	.|.	.|.	.|.	.|.	.|.	.|.	.|.	.|.	28|28	30|30	.|.
chr10:17655096-17655146	.|.	38|40	.|.	40|44	.|.	.|.	.|.	.|.	.|.	.|.	.|.	44|46	36|46	.|.	.|.	.|.	.|.	.|.	.|.	.|.	.|.	.|.	.|.	.|.	.|.	40|42	42|44	40|44	.|.	.|.	44|44	.|.	.|.	.|.	42|46	42|44	42|46	.|.	40|42	42|42	.|.	40|42	46|46	.|.	.|.	.|.	44|46	44|46	38|38
chr10:18840173-18840221	.|.	.|.	.|.	.|.	.|.	.|.	.|.	.|.	.|.	.|.	.|.	.|.	.|.	.|.	.|.	54|58	.|.	.|.	.|.	40|40	.|.	.|.	.|.	.|.	.|.	.|.	.|.	.|.	.|.	.|.	.|.	.|.	.|.	.|.	.|.	.|.	40|40	.|.	.|.	.|.	.|.	.|.	.|.	.|.	.|.	.|.	.|.	.|.	.|.
chr10:19172074-19172098	.|.	.|.	.|.	.|.	.|.	.|.	.|.	24|24	.|.	.|.	.|.	.|.	.|.	.|.	.|.	.|.	.|.	.|.	.|.	.|.	.|.	.|.	.|.	.|.	.|.	.|.	.|.	.|.	.|.	.|.	.|.	.|.	.|.	.|.	.|.	.|.	.|.	.|.	.|.	.|.	.|.	.|.	.|.	.|.	.|.	.|.	.|.	.|.	.|.
chr10:19336284-19336314	.|.	22|24	.|.	.|.	.|.	.|.	.|.	.|.	.|.	.|.	.|.	.|.	.|.	.|.	.|.	.|.	.|.	.|.	.|.	.|.	.|.	.|.	20|24	.|.	.|.	.|.	.|.	.|.	.|.	.|.	24|26	.|.	.|.	.|.	.|.	.|.	.|.	.|.	.|.	.|.	.|.	.|.	.|.	.|.	.|.	.|.	.|.	.|.	.|.
chr10:19474743-19474773	34|36	.|.	.|.	.|.	.|.	.|.	32|34	.|.	32|34	.|.	.|.	.|.	.|.	.|.	32|34	32|32	.|.	.|.	.|.	32|34	.|.	32|32	32|34	32|34	32|34	.|.	32|34	.|.	.|.	.|.	32|32	28|32	30|34	32|32	30|32	30|34	.|.	.|.	30|34	32|32	.|.	.|.	.|.	34|34	.|.	30|34	.|.	32|34	32|34
chr10:19647124-19647160	.|.	.|.	.|.	.|.	.|.	.|.	.|.	.|.	.|.	.|.	.|.	.|.	.|.	.|.	.|.	.|.	.|.	.|.	.|.	.|.	32|34	.|.	.|.	.|.	.|.	.|.	.|.	.|.	52|52	.|.	.|.	.|.	.|.	32|34	.|.	.|.	.|.	.|.	.|.	.|.	.|.	.|.	.|.	.|.	.|.	.|.	.|.	.|.	.|.
chr10:19988950-19988990	.|.	.|.	.|.	42|44	.|.	.|.	40|40	.|.	.|.	40|42	.|.	42|42	.|.	.|.	.|.	.|.	.|.	.|.	.|.	.|.	.|.	.|.	.|.	40|42	.|.	42|42	.|.	.|.	40|42	.|.	.|.	.|.	.|.	.|.	.|.	.|.	.|.	40|38	40|42	.|.	40|38	.|.	.|.	.|.	.|.	.|.	40|42	.|.	.|.
chr10:20636971-20637021	.|.	.|.	.|.	.|.	.|.	.|.	.|.	.|.	34|36	34|34	.|.	.|.	.|.	.|.	.|.	.|.	.|.	.|.	.|.	28|34	.|.	.|.	34|34	.|.	.|.	32|32	.|.	.|.	.|.	.|.	.|.	.|.	.|.	.|.	34|34	34|34	34|34	.|.	.|.	.|.	.|.	.|.	.|.	.|.	.|.	.|.	.|.	.|.	.|.
chr10:21251932-21251976	.|.	.|.	.|.	.|.	.|.	.|.	.|.	44|42	.|.	.|.	.|.	.|.	.|.	.|.	.|.	.|.	.|.	.|.	.|.	.|.	.|.	.|.	.|.	.|.	34|34	.|.	.|.	.|.	.|.	.|.	.|.	.|.	40|42	.|.	34|34	.|.	34|34	.|.	.|.	.|.	34|34	.|.	.|.	.|.	.|.	.|.	.|.	.|.	.|.
chr10:22582845-22582881	.|.	.|.	.|.	.|.	.|.	.|.	.|.	.|.	.|.	.|.	.|.	.|.	.|.	.|.	.|.	.|.	.|.	.|.	.|.	.|.	.|.	.|.	.|.	.|.	.|.	.|.	.|.	.|.	.|.	.|.	.|.	.|.	40|40	.|.	.|.	.|.	.|.	.|.	.|.	.|.	.|.	.|.	40|40	.|.	.|.	.|.	.|.	40|40	.|.
chr10:22749679-22749705	.|.	.|.	.|.	.|.	.|.	.|.	.|.	.|.	.|.	.|.	.|.	.|.	.|.	.|.	.|.	.|.	28|30	26|30	.|.	.|.	.|.	.|.	.|.	.|.	.|.	.|.	.|.	.|.	.|.	.|.	.|.	.|.	.|.	.|.	.|.	.|.	.|.	.|.	.|.	.|.	28|30	.|.	.|.	.|.	.|.	.|.	.|.	26|30	.|.
chr10:22892938-22892966	.|.	.|.	.|.	.|.	28|26	28|30	.|.	.|.	28|30	28|26	.|.	.|.	.|.	.|.	.|.	.|.	.|.	.|.	.|.	28|30	.|.	28|30	.|.	.|.	.|.	28|30	28|30	30|30	28|30	.|.	.|.	.|.	28|30	.|.	.|.	.|.	28|30	.|.	28|30	.|.	28|30	.|.	.|.	.|.	.|.	28|30	.|.	28|30	.|.
chr10:2335481-2335511	.|.	28|28	.|.	.|.	.|.	.|.	28|28	.|.	.|.	32|34	.|.	.|.	.|.	28|28	.|.	32|34	.|.	.|.	.|.	28|34	.|.	.|.	.|.	28|28	26|28	.|.	30|32	32|34	28|28	.|.	.|.	.|.	28|34	.|.	.|.	34|36	.|.	.|.	.|.	.|.	30|36	.|.	.|.	.|.	28|28	.|.	.|.	.|.	.|.
chr10:23372074-23372102	.|.	.|.	.|.	.|.	.|.	.|.	.|.	28|30	.|.	.|.	.|.	.|.	.|.	28|30	.|.	.|.	.|.	.|.	.|.	.|.	.|.	.|.	.|.	.|.	.|.	.|.	.|.	.|.	28|26	.|.	.|.	.|.	.|.	.|.	.|.	.|.	.|.	.|.	.|.	.|.	.|.	28|26	.|.	.|.	.|.	.|.	.|.	.|.	.|.
chr10:23478415-23478447	.|.	.|.	44|46	.|.	.|.	.|.	.|.	42|46	.|.	42|44	.|.	28|30	.|.	28|30	28|30	.|.	.|.	.|.	.|.	30|40	.|.	24|28	.|.	.|.	.|.	.|.	.|.	28|30	.|.	.|.	.|.	.|.	40|42	.|.	.|.	.|.	.|.	.|.	28|30	.|.	28|30	.|.	28|30	24|30	.|.	40|42	.|.	.|.	.|.
chr10:23844133-23844158	.|.	25|25	.|.	25|25	25|25	.|.	.|.	.|.	.|.	.|.	.|.	.|.	.|.	25|25	.|.	.|.	.|.	.|.	.|.	.|.	.|.	.|.	.|.	.|.	25|25	.|.	.|.	.|.	.|.	.|.	.|.	.|.	25|25	.|.	.|.	.|.	25|25	25|25	.|.	.|.	.|.	.|.	.|.	.|.	25|25	.|.	.|.	.|.	.|.
chr10:23991595-23991637	.|.	.|.	.|.	.|.	.|.	.|.	.|.	.|.	.|.	.|.	.|.	.|.	.|.	.|.	.|.	.|.	.|.	.|.	.|.	.|.	36|38	.|.	.|.	.|.	.|.	.|.	.|.	.|.	.|.	.|.	.|.	.|.	.|.	.|.	.|.	.|.	.|.	.|.	.|.	.|.	.|.	.|.	.|.	.|.	.|.	.|.	.|.	.|.	.|.
chr10:24482730-24482774	.|.	.|.	.|.	.|.	.|.	.|.	.|.	.|.	.|.	.|.	.|.	.|.	.|.	.|.	.|.	.|.	36|38	.|.	.|.	.|.	.|.	.|.	.|.	.|.	.|.	.|.	36|38	.|.	.|.	.|.	36|38	.|.	.|.	.|.	.|.	.|.	28|28	.|.	26|38	.|.	34|38	.|.	.|.	.|.	.|.	36|38	.|.	.|.	34|38
chr10:2448622-2448646	24|26	26|26	24|26	.|.	.|.	24|26	.|.	.|.	26|26	.|.	.|.	.|.	.|.	.|.	.|.	.|.	.|.	24|26	.|.	24|26	.|.	.|.	.|.	24|26	26|28	.|.	.|.	.|.	24|26	.|.	24|26	.|.	.|.	.|.	24|26	.|.	.|.	.|.	.|.	.|.	24|26	.|.	24|26	.|.	.|.	26|26	.|.	.|.	.|.
chr10:24497303-24497331	.|.	.|.	.|.	.|.	.|.	.|.	.|.	.|.	.|.	.|.	.|.	.|.	.|.	.|.	.|.	.|.	.|.	.|.	.|.	24|24	.|.	.|.	.|.	24|26	.|.	.|.	.|.	.|.	.|.	.|.	24|24	.|.	24|26	.|.	.|.	.|.	.|.	.|.	.|.	.|.	.|.	.|.	.|.	.|.	.|.	.|.	.|.	.|.	.|.
chr10:24689891-24689927	.|.	.|.	.|.	.|.	.|.	.|.	.|.	.|.	.|.	.|.	.|.	.|.	.|.	.|.	.|.	32|34	.|.	.|.	.|.	.|.	.|.	.|.	.|.	.|.	.|.	.|.	.|.	.|.	.|.	.|.	.|.	.|.	.|.	.|.	26|28	30|32	.|.	.|.	.|.	.|.	.|.	32|34	.|.	.|.	.|.	.|.	.|.	.|.	.|.
chr10:2559628-2559676	.|.	.|.	.|.	.|.	.|.	.|.	.|.	.|.	.|.	.|.	.|.	.|.	.|.	.|.	.|.	.|.	.|.	.|.	.|.	.|.	.|.	.|.	.|.	.|.	.|.	.|.	.|.	.|.	.|.	.|.	.|.	.|.	.|.	.|.	.|.	.|.	.|.	.|.	.|.	.|.	.|.	.|.	.|.	.|.	.|.	.|.	.|.	.|.	.|.
chr10:25610575-25610607	.|.	.|.	.|.	.|.	.|.	.|.	.|.	.|.	.|.	.|.	32|32	.|.	.|.	.|.	.|.	.|.	.|.	.|.	.|.	.|.	.|.	.|.	.|.	.|.	.|.	.|.	.|.	.|.	.|.	.|.	.|.	.|.	.|.	.|.	.|.	.|.	.|.	.|.	.|.	.|.	.|.	.|.	.|.	.|.	.|.	.|.	.|.	.|.	.|.
chr10:25637325-25637365	.|.	.|.	.|.	.|.	.|.	.|.	.|.	.|.	.|.	.|.	.|.	.|.	.|.	.|.	.|.	.|.	.|.	.|.	.|.	.|.	.|.	.|.	.|.	.|.	32|32	.|.	.|.	.|.	.|.	.|.	.|.	.|.	.|.	.|.	.|.	32|34	.|.	.|.	.|.	.|.	.|.	.|.	.|.	.|.	.|.	.|.	.|.	.|.	.|.
chr10:25767422-25767456	28|28	.|.	26|28	.|.	.|.	.|.	.|.	.|.	.|.	.|.	26|26	26|28	.|.	.|.	.|.	26|28	.|.	.|.	.|.	.|.	.|.	.|.	.|.	.|.	.|.	.|.	.|.	26|26	.|.	.|.	.|.	.|.	.|.	26|26	.|.	.|.	.|.	.|.	.|.	.|.	.|.	.|.	.|.	.|.	.|.	.|.	.|.	.|.	.|.
chr10:26393795-26393825	.|.	.|.	.|.	.|.	.|.	.|.	26|24	24|24	.|.	.|.	.|.	24|24	.|.	.|.	.|.	.|.	.|.	.|.	.|.	.|.	.|.	.|.	24|24	.|.	.|.	.|.	.|.	.|.	24|24	.|.	.|.	.|.	.|.	.|.	.|.	.|.	.|.	.|.	.|.	26|24	.|.	.|.	.|.	.|.	.|.	.|.	.|.	.|.	.|.
chr10:26584437-26584477	46|50	.|.	36|40	.|.	44|48	.|.	38|40	.|.	.|.	40|40	.|.	.|.	.|.	.|.	.|.	.|.	.|.	.|.	.|.	.|.	.|.	.|.	.|.	.|.	44|48	.|.	38|40	.|.	44|50	.|.	.|.	.|.	36|40	46|50	.|.	.|.	.|.	.|.	.|.	.|.	.|.	.|.	.|.	48|54	.|.	38|40	44|48	.|.	.|.
chr10:26761498-26761530	.|.	32|32	.|.	.|.	.|.	.|.	.|.	.|.	.|.	.|.	.|.	.|.	.|.	.|.	.|.	.|.	.|.	.|.	.|.	.|.	32|32	32|32	.|.	.|.	.|.	.|.	.|.	.|.	.|.	.|.	.|.	.|.	.|.	.|.	.|.	.|.	32|32	.|.	.|.	.|.	.|.	.|.	.|.	.|.	.|.	.|.	.|.	.|.	.|.
chr10:26770755-26770797	.|.	.|.	.|.	.|.	.|.	.|.	.|.	.|.	.|.	.|.	.|.	36|38	.|.	36|38	.|.	.|.	.|.	.|.	.|.	.|.	.|.	.|.	.|.	.|.	36|36	.|.	36|36	34|36	.|.	.|.	36|36	.|.	36|38	.|.	.|.	.|.	.|.	.|.	.|.	34|38	.|.	.|.	.|.	.|.	.|.	.|.	.|.	.|.	.|.
chr10:27010352-27010378	.|.	.|.	.|.	.|.	.|.	.|.	.|.	.|.	.|.	.|.	.|.	.|.	.|.	.|.	.|.	.|.	.|.	.|.	.|.	.|.	.|.	.|.	.|.	.|.	.|.	.|.	.|.	.|.	.|.	.|.	.|.	.|.	.|.	.|.	36|40	.|.	.|.	.|.	.|.	.|.	.|.	28|28	.|.	.|.	.|.	.|.	.|.	.|.	.|.
chr10:2801108-2801136	26|28	.|.	.|.	.|.	.|.	28|28	.|.	28|30	.|.	.|.	.|.	.|.	28|30	.|.	28|30	28|30	.|.	.|.	.|.	.|.	.|.	28|30	.|.	.|.	.|.	30|32	.|.	.|.	28|26	.|.	28|30	.|.	28|30	.|.	.|.	.|.	.|.	28|30	26|30	28|30	.|.	.|.	.|.	.|.	.|.	.|.	28|30	.|.	.|.
chr10:28282903-28282937	.|.	.|.	.|.	.|.	.|.	.|.	.|.	.|.	.|.	.|.	.|.	.|.	.|.	.|.	.|.	.|.	.|.	.|.	.|.	.|.	.|.	.|.	.|.	.|.	.|.	.|.	.|.	.|.	.|.	.|.	.|.	.|.	.|.	.|.	32|34	34|34	.|.	.|.	.|.	.|.	32|34	.|.	.|.	.|.	.|.	.|.	34|34	.|.	.|.
chr10:28327378-28327416	.|.	.|.	.|.	.|.	.|.	.|.	.|.	.|.	.|.	36|36	.|.	.|.	36|36	.|.	.|.	.|.	.|.	36|36	.|.	.|.	.|.	.|.	.|.	.|.	.|.	.|.	.|.	.|.	.|.	.|.	.|.	.|.	.|.	.|.	.|.	.|.	.|.	.|.	.|.	.|.	.|.	.|.	.|.	.|.	36|36	.|.	.|.	.|.	.|.
chr10:28351460-28351510	.|.	.|.	32|34	.|.	.|.	.|.	.|.	.|.	32|34	.|.	.|.	.|.	32|34	.|.	.|.	.|.	.|.	.|.	.|.	32|34	.|.	.|.	.|.	.|.	.|.	32|34	32|34	28|34	.|.	.|.	.|.	.|.	.|.	.|.	.|.	32|34	.|.	.|.	32|34	.|.	32|34	.|.	.|.	.|.	.|.	.|.	.|.	32|34	.|.
chr10:29031642-29031684	.|.	.|.	.|.	.|.	.|.	.|.	.|.	.|.	.|.	.|.	.|.	.|.	.|.	.|.	.|.	.|.	.|.	.|.	.|.	.|.	.|.	.|.	.|.	28|30	28|35	.|.	.|.	.|.	.|.	.|.	.|.	.|.	.|.	.|.	.|.	.|.	.|.	.|.	.|.	.|.	.|.	.|.	.|.	.|.	.|.	.|.	.|.	.|.	.|.
chr10:29042532-29042574	.|.	.|.	.|.	.|.	.|.	.|.	.|.	.|.	.|.	.|.	.|.	.|.	.|.	.|.	.|.	.|.	.|.	.|.	.|.	.|.	.|.	.|.	.|.	.|.	.|.	16|18	.|.	.|.	.|.	.|.	.|.	.|.	16|16	.|.	.|.	18|28	.|.	16|16	16|22	.|.	16|18	.|.	18|26	.|.	.|.	.|.	.|.	.|.	18|20
chr10:29796526-29796550	.|.	.|.	.|.	.|.	.|.	.|.	.|.	26|26	.|.	.|.	.|.	.|.	24|26	.|.	.|.	.|.	22|22	.|.	.|.	22|22	26|26	.|.	.|.	22|22	22|22	24|26	.|.	.|.	26|26	26|28	22|26	.|.	.|.	.|.	.|.	.|.	.|.	26|26	.|.	.|.	24|26	.|.	.|.	26|26	.|.	.|.	.|.	.|.	.|.
chr10:29962509-29962533	24|24	.|.	.|.	.|.	.|.	.|.	24|24	.|.	.|.	.|.	24|18	.|.	.|.	.|.	.|.	.|.	.|.	.|.	.|.	.|.	.|.	24|24	.|.	.|.	.|.	24|22	.|.	.|.	.|.	.|.	24|24	.|.	.|.	.|.	.|.	.|.	20|22	.|.	24|20	.|.	.|.	24|20	.|.	.|.	20|20	20|20	.|.	.|.	.|.
chr10:30511165-30511189	.|.	.|.	.|.	.|.	.|.	.|.	.|.	.|.	.|.	.|.	.|.	.|.	.|.	.|.	.|.	.|.	.|.	.|.	.|.	20|20	.|.	.|.	.|.	.|.	.|.	.|.	.|.	.|.	.|.	.|.	.|.	.|.	.|.	.|.	.|.	.|.	.|.	.|.	.|.	.|.	.|.	.|.	.|.	.|.	.|.	.|.	.|.	.|.	.|.
chr10:31232788-31232820	28|28	.|.	.|.	.|.	.|.	.|.	.|.	28|28	.|.	.|.	.|.	.|.	.|.	.|.	.|.	.|.	.|.	.|.	.|.	.|.	.|.	28|28	.|.	.|.	28|28	.|.	28|28	28|28	.|.	.|.	28|28	.|.	.|.	.|.	.|.	.|.	.|.	.|.	.|.	.|.	.|.	.|.	.|.	.|.	.|.	.|.	.|.	.|.	.|.
chr10:31562894-31562934	.|.	.|.	.|.	.|.	40|44	.|.	.|.	40|40	.|.	.|.	.|.	.|.	.|.	.|.	.|.	.|.	.|.	.|.	.|.	.|.	.|.	.|.	.|.	.|.	.|.	.|.	.|.	.|.	.|.	.|.	.|.	.|.	.|.	.|.	.|.	.|.	.|.	.|.	.|.	.|.	.|.	.|.	.|.	.|.	.|.	.|.	40|40	.|.	.|.
chr10:31612893-31612925	.|.	.|.	.|.	.|.	.|.	.|.	.|.	.|.	.|.	.|.	.|.	.|.	.|.	.|.	.|.	.|.	.|.	.|.	.|.	.|.	.|.	.|.	.|.	.|.	.|.	.|.	.|.	.|.	.|.	.|.	.|.	.|.	.|.	.|.	.|.	.|.	.|.	.|.	.|.	.|.	.|.	.|.	.|.	.|.	.|.	.|.	.|.	.|.	.|.
chr10:31748759-31748811	38|40	38|40	.|.	.|.	.|.	38|40	.|.	32|32	.|.	38|40	.|.	.|.	.|.	.|.	38|40	36|38	.|.	.|.	.|.	.|.	.|.	.|.	.|.	32|32	.|.	.|.	32|40	.|.	38|40	.|.	.|.	38|40	36|40	.|.	38|40	32|38	.|.	38|40	32|38	36|40	32|40	.|.	.|.	.|.	32|34	.|.	34|40	.|.	38|40
chr10:32207243-32207287	.|.	.|.	.|.	.|.	.|.	.|.	.|.	46|48	.|.	.|.	.|.	.|.	.|.	.|.	.|.	.|.	.|.	46|48	.|.	48|48	.|.	.|.	48|48	44|44	42|46	.|.	.|.	.|.	.|.	.|.	.|.	.|.	44|42	.|.	.|.	.|.	.|.	.|.	42|42	46|48	46|48	42|42	.|.	42|42	46|48	.|.	42|42	.|.	.|.
chr10:32353239-32353269	.|.	26|26	38|38	.|.	.|.	26|26	.|.	38|38	.|.	.|.	.|.	38|38	.|.	.|.	34|38	36|38	26|26	.|.	.|.	26|26	.|.	.|.	36|38	36|38	36|38	.|.	.|.	26|26	.|.	.|.	38|38	.|.	.|.	.|.	.|.	34|38	.|.	.|.	.|.	36|38	36|38	.|.	38|38	26|26	.|.	26|26	.|.	.|.	36|38
chr10:32595785-32595813	.|.	.|.	.|.	.|.	.|.	.|.	.|.	.|.	.|.	.|.	24|22	.|.	.|.	.|.	.|.	.|.	.|.	.|.	.|.	.|.	.|.	.|.	.|.	.|.	.|.	.|.	.|.	.|.	22|22	.|.	.|.	.|.	.|.	.|.	.|.	24|24	.|.	.|.	.|.	.|.	.|.	.|.	24|24	.|.	.|.	.|.	.|.	.|.	.|.
chr10:32962582-32962616	.|.	.|.	.|.	.|.	.|.	.|.	.|.	.|.	.|.	32|34	.|.	.|.	32|32	.|.	.|.	.|.	.|.	.|.	.|.	.|.	.|.	.|.	.|.	.|.	.|.	.|.	.|.	.|.	34|34	.|.	.|.	.|.	.|.	.|.	.|.	.|.	.|.	.|.	.|.	.|.	32|32	.|.	.|.	.|.	.|.	.|.	32|32	.|.	.|.
chr10:3385296-3385330	.|.	42|42	.|.	.|.	42|42	46|46	.|.	.|.	40|42	.|.	.|.	.|.	.|.	.|.	46|46	.|.	46|46	.|.	.|.	38|40	.|.	.|.	.|.	40|40	.|.	40|46	40|40	.|.	.|.	.|.	42|42	.|.	.|.	.|.	.|.	.|.	38|40	.|.	46|46	44|44	44|46	46|48	46|46	.|.	.|.	.|.	40|46	.|.	40|40
chr10:34543465-34543507	.|.	40|40	.|.	.|.	.|.	.|.	.|.	.|.	.|.	.|.	26|26	.|.	.|.	.|.	38|40	.|.	.|.	26|26	.|.	38|38	.|.	26|38	26|26	.|.	.|.	.|.	38|38	26|26	.|.	.|.	.|.	.|.	26|38	.|.	.|.	26|38	.|.	.|.	.|.	.|.	.|.	.|.	38|38	34|36	.|.	36|38	38|38	.|.	.|.
chr10:34700847-34700891	.|.	.|.	.|.	.|.	.|.	.|.	.|.	.|.	.|.	.|.	.|.	.|.	.|.	.|.	.|.	.|.	.|.	34|36	.|.	.|.	.|.	.|.	.|.	.|.	.|.	.|.	.|.	.|.	.|.	.|.	.|.	.|.	.|.	.|.	.|.	.|.	.|.	.|.	.|.	.|.	.|.	.|.	.|.	.|.	34|36	34|36	.|.	.|.	.|.
chr10:35094470-35094494	.|.	.|.	.|.	.|.	.|.	.|.	.|.	.|.	.|.	.|.	.|.	.|.	16|18	.|.	.|.	.|.	.|.	.|.	.|.	.|.	.|.	.|.	16|20	.|.	.|.	18|20	.|.	.|.	.|.	.|.	.|.	.|.	.|.	.|.	.|.	.|.	.|.	.|.	.|.	.|.	.|.	.|.	.|.	.|.	.|.	.|.	.|.	.|.	.|.
chr10:35292305-35292355	.|.	.|.	.|.	.|.	50|54	.|.	.|.	52|56	.|.	50|52	.|.	50|46	.|.	.|.	50|54	.|.	.|.	.|.	.|.	.|.	.|.	.|.	56|60	50|54	.|.	.|.	.|.	.|.	.|.	.|.	.|.	.|.	.|.	52|54	.|.	54|60	.|.	.|.	.|.	.|.	.|.	54|58	.|.	.|.	.|.	.|.	.|.	.|.	.|.
chr10:35483829-35483856	.|.	.|.	.|.	.|.	.|.	.|.	.|.	.|.	.|.	.|.	.|.	.|.	.|.	.|.	.|.	.|.	27|27	.|.	.|.	.|.	.|.	.|.	.|.	.|.	27|21	.|.	.|.	.|.	.|.	.|.	.|.	.|.	.|.	.|.	.|.	.|.	.|.	.|.	.|.	.|.	.|.	.|.	.|.	.|.	.|.	.|.	.|.	.|.	.|.
chr10:37651554-37651578	.|.	24|24	24|24	.|.	24|24	.|.	24|24	24|24	24|24	.|.	.|.	24|24	24|24	24|24	.|.	.|.	.|.	.|.	.|.	24|24	.|.	24|24	24|24	.|.	24|24	24|24	24|24	24|24	24|24	.|.	24|24	.|.	24|24	24|24	.|.	24|24	24|24	.|.	24|24	24|20	24|24	24|24	24|24	24|24	24|24	24|24	24|20	24|24	24|24
chr10:37735382-37735422	30|34	32|34	32|32	.|.	32|34	.|.	.|.	.|.	28|34	.|.	.|.	34|34	.|.	34|34	34|34	.|.	.|.	34|34	.|.	32|32	32|32	34|34	32|32	32|34	.|.	32|32	32|34	32|34	.|.	.|.	32|34	.|.	36|34	32|34	.|.	32|34	.|.	.|.	.|.	.|.	32|34	30|34	30|34	34|34	32|34	.|.	32|34	28|34	.|.
chr10:38651875-38651923	.|.	.|.	.|.	.|.	42|42	.|.	.|.	38|42	.|.	.|.	40|42	.|.	.|.	.|.	.|.	40|40	.|.	.|.	.|.	.|.	.|.	38|38	.|.	.|.	.|.	.|.	34|34	34|34	38|38	.|.	.|.	.|.	38|40	.|.	.|.	.|.	.|.	.|.	.|.	38|40	.|.	.|.	.|.	.|.	38|38	.|.	38|40	.|.	.|.
chr10:4305029-4305055	30|30	.|.	.|.	28|30	.|.	.|.	.|.	.|.	.|.	28|30	.|.	.|.	.|.	.|.	.|.	.|.	.|.	.|.	.|.	.|.	.|.	.|.	.|.	.|.	.|.	.|.	.|.	.|.	.|.	.|.	.|.	.|.	.|.	.|.	.|.	.|.	.|.	.|.	.|.	.|.	.|.	.|.	.|.	.|.	.|.	.|.	.|.	.|.	.|.
chr10:43321685-43321727	.|.	.|.	.|.	.|.	.|.	.|.	.|.	.|.	.|.	.|.	.|.	.|.	.|.	.|.	.|.	.|.	.|.	.|.	.|.	42|32	.|.	.|.	.|.	.|.	.|.	.|.	.|.	.|.	.|.	.|.	.|.	.|.	.|.	.|.	.|.	.|.	.|.	38|40	.|.	.|.	.|.	.|.	.|.	.|.	.|.	.|.	36|36	36|40	.|.
chr10:43533361-43533385	.|.	.|.	.|.	.|.	.|.	24|24	.|.	.|.	.|.	.|.	.|.	.|.	.|.	.|.	.|.	.|.	.|.	.|.	24|24	.|.	.|.	.|.	.|.	.|.	.|.	.|.	.|.	.|.	.|.	.|.	.|.	.|.	.|.	.|.	.|.	.|.	.|.	.|.	.|.	.|.	.|.	.|.	.|.	.|.	24|24	.|.	.|.	.|.	.|.
chr10:43603007-43603049	.|.	.|.	.|.	.|.	.|.	.|.	.|.	.|.	.|.	.|.	.|.	.|.	.|.	.|.	.|.	.|.	.|.	.|.	.|.	.|.	.|.	.|.	32|36	.|.	.|.	.|.	.|.	.|.	.|.	.|.	.|.	.|.	.|.	.|.	.|.	.|.	.|.	.|.	.|.	.|.	.|.	.|.	.|.	.|.	.|.	.|.	.|.	.|.	.|.
chr10:44400914-44400950	.|.	.|.	.|.	.|.	.|.	.|.	.|.	.|.	34|34	.|.	.|.	36|36	.|.	.|.	36|34	.|.	.|.	.|.	.|.	.|.	.|.	36|34	32|34	36|32	.|.	.|.	36|36	32|34	36|34	.|.	36|34	.|.	34|34	.|.	.|.	36|34	.|.	.|.	32|32	.|.	34|34	34|34	.|.	.|.	.|.	32|34	36|36	34|34	.|.
chr10:4497474-4497502	.|.	.|.	.|.	.|.	28|28	.|.	28|30	30|30	.|.	.|.	30|30	28|28	28|28	.|.	.|.	.|.	.|.	.|.	.|.	28|30	30|30	28|28	30|30	30|30	.|.	28|30	30|30	.|.	30|30	.|.	.|.	.|.	28|28	30|30	28|28	28|30	28|28	.|.	30|30	30|30	28|30	28|26	.|.	28|30	.|.	30|30	28|30	28|30	28|28
chr10:45067523-45067551	.|.	26|26	.|.	.|.	.|.	24|26	.|.	.|.	.|.	.|.	.|.	.|.	.|.	.|.	.|.	.|.	.|.	.|.	.|.	.|.	.|.	.|.	32|36	26|26	.|.	.|.	.|.	.|.	.|.	.|.	.|.	.|.	.|.	.|.	.|.	.|.	.|.	.|.	.|.	.|.	.|.	.|.	34|36	.|.	.|.	.|.	.|.	.|.	.|.
chr10:47028745-47028783	.|.	.|.	.|.	.|.	.|.	.|.	.|.	.|.	.|.	.|.	.|.	.|.	.|.	.|.	.|.	.|.	.|.	.|.	.|.	.|.	.|.	.|.	.|.	.|.	.|.	.|.	.|.	.|.	34|36	.|.	.|.	.|.	34|36	.|.	.|.	.|.	.|.	.|.	.|.	.|.	.|.	.|.	.|.	.|.	.|.	.|.	.|.	.|.	.|.
chr10:4844391-4844421	32|34	28|34	28|28	28|34	32|34	.|.	.|.	.|.	.|.	28|28	.|.	32|34	32|34	.|.	.|.	28|28	26|32	32|34	.|.	28|34	28|28	.|.	28|34	32|34	28|28	28|34	28|34	.|.	28|34	32|34	28|34	28|28	28|28	28|28	.|.	32|34	32|34	30|34	28|28	28|34	28|34	32|34	32|34	28|34	28|34	28|34	30|30	28|28	30|32
chr10:48528599-48528624	.|.	.|.	.|.	.|.	.|.	.|.	.|.	.|.	.|.	25|25	.|.	.|.	25|25	.|.	.|.	.|.	.|.	.|.	.|.	.|.	.|.	.|.	.|.	.|.	.|.	.|.	.|.	.|.	.|.	.|.	.|.	.|.	.|.	.|.	.|.	.|.	.|.	.|.	.|.	.|.	.|.	.|.	.|.	.|.	.|.	.|.	.|.	.|.	.|.
chr10:49327781-49327815	.|.	.|.	.|.	.|.	.|.	.|.	.|.	.|.	.|.	.|.	.|.	.|.	.|.	.|.	.|.	.|.	.|.	.|.	.|.	.|.	.|.	.|.	.|.	.|.	.|.	.|.	.|.	.|.	.|.	.|.	.|.	.|.	.|.	.|.	.|.	.|.	.|.	.|.	.|.	.|.	.|.	.|.	.|.	.|.	.|.	.|.	.|.	.|.	.|.
chr10:50391398-50391422	.|.	.|.	.|.	.|.	.|.	.|.	.|.	.|.	.|.	.|.	.|.	.|.	.|.	.|.	.|.	.|.	.|.	.|.	.|.	.|.	.|.	.|.	.|.	.|.	.|.	.|.	24|24	.|.	.|.	.|.	.|.	.|.	.|.	.|.	.|.	.|.	.|.	.|.	.|.	.|.	.|.	24|24	.|.	.|.	.|.	.|.	.|.	.|.	.|.
chr10:5198719-5198759	.|.	32|32	.|.	.|.	28|28	.|.	28|28	.|.	32|32	32|32	28|28	28|32	.|.	28|28	32|32	32|32	.|.	.|.	28|28	32|32	.|.	.|.	28|32	28|28	32|32	.|.	32|32	32|32	32|32	.|.	28|32	28|28	28|32	.|.	.|.	28|32	32|32	.|.	28|32	.|.	28|32	28|32	28|32	28|32	32|32	32|32	28|32	28|32	28|32
chr10:52271008-52271042	.|.	.|.	.|.	.|.	38|36	.|.	.|.	.|.	.|.	.|.	36|38	.|.	50|52	.|.	.|.	.|.	.|.	.|.	.|.	.|.	.|.	.|.	.|.	.|.	.|.	.|.	.|.	50|54	.|.	.|.	.|.	.|.	.|.	.|.	.|.	.|.	.|.	.|.	.|.	.|.	.|.	.|.	.|.	.|.	.|.	.|.	.|.	.|.	.|.
chr10:52799992-52800032	.|.	.|.	.|.	.|.	.|.	.|.	.|.	.|.	.|.	28|30	.|.	.|.	.|.	.|.	.|.	.|.	.|.	.|.	.|.	.|.	.|.	.|.	.|.	.|.	.|.	.|.	.|.	.|.	.|.	.|.	.|.	.|.	.|.	.|.	.|.	.|.	.|.	.|.	.|.	.|.	.|.	.|.	.|.	.|.	.|.	.|.	.|.	.|.	.|.
chr10:52859144-52859172	.|.	30|30	34|30	28|30	34|32	.|.	30|28	30|28	30|28	34|32	30|30	30|28	34|32	.|.	.|.	34|32	.|.	.|.	30|30	30|34	30|32	.|.	.|.	.|.	32|32	34|32	32|28	.|.	34|28	.|.	34|30	.|.	34|30	.|.	.|.	34|30	30|30	.|.	30|34	34|30	28|30	32|28	.|.	34|30	34|32	.|.	30|28	28|30	.|.
chr10:53729761-53729811	.|.	.|.	.|.	.|.	.|.	.|.	36|38	.|.	.|.	.|.	.|.	.|.	.|.	.|.	.|.	.|.	.|.	.|.	.|.	.|.	.|.	.|.	.|.	.|.	.|.	.|.	.|.	.|.	.|.	.|.	.|.	.|.	.|.	.|.	.|.	.|.	.|.	.|.	.|.	.|.	.|.	.|.	.|.	.|.	.|.	.|.	.|.	.|.	.|.
chr10:53876924-53876960	.|.	.|.	.|.	.|.	.|.	.|.	.|.	.|.	.|.	.|.	.|.	.|.	.|.	.|.	.|.	54|56	.|.	.|.	.|.	.|.	50|52	.|.	.|.	.|.	.|.	.|.	.|.	.|.	.|.	.|.	.|.	.|.	.|.	.|.	.|.	.|.	.|.	.|.	.|.	.|.	.|.	.|.	.|.	.|.	.|.	.|.	.|.	.|.	.|.
chr10:5426045-5426101	26|28	.|.	.|.	.|.	.|.	.|.	.|.	.|.	.|.	.|.	.|.	.|.	.|.	.|.	.|.	.|.	.|.	.|.	.|.	.|.	.|.	.|.	.|.	.|.	26|28	.|.	.|.	.|.	.|.	.|.	.|.	.|.	.|.	22|28	.|.	.|.	.|.	.|.	.|.	.|.	.|.	.|.	.|.	.|.	.|.	.|.	28|30	.|.	.|.
chr10:55087591-55087621	.|.	.|.	.|.	.|.	.|.	.|.	.|.	27|27	.|.	.|.	.|.	.|.	.|.	.|.	.|.	.|.	.|.	.|.	.|.	.|.	.|.	.|.	30|30	.|.	.|.	.|.	.|.	.|.	.|.	.|.	.|.	.|.	.|.	.|.	.|.	.|.	.|.	.|.	.|.	.|.	.|.	30|27	.|.	.|.	.|.	.|.	.|.	.|.	.|.
chr10:55169871-55169913	.|.	.|.	.|.	.|.	.|.	.|.	.|.	.|.	.|.	.|.	.|.	.|.	.|.	.|.	.|.	.|.	.|.	.|.	.|.	.|.	.|.	.|.	.|.	.|.	.|.	.|.	30|26	.|.	.|.	.|.	.|.	.|.	.|.	.|.	.|.	.|.	.|.	30|32	.|.	.|.	.|.	.|.	.|.	.|.	.|.	.|.	.|.	.|.	.|.
chr10:55229533-55229565	.|.	.|.	.|.	.|.	.|.	.|.	.|.	.|.	.|.	.|.	.|.	.|.	.|.	.|.	.|.	.|.	.|.	.|.	.|.	.|.	.|.	28|30	.|.	.|.	34|36	.|.	.|.	.|.	.|.	.|.	.|.	.|.	34|36	.|.	.|.	.|.	.|.	.|.	.|.	.|.	.|.	.|.	.|.	.|.	.|.	.|.	.|.	.|.	.|.
chr10:55631211-55631241	.|.	.|.	.|.	.|.	.|.	.|.	32|30	32|30	.|.	.|.	36|34	.|.	.|.	.|.	.|.	.|.	.|.	.|.	.|.	34|30	.|.	32|30	.|.	34|34	.|.	34|32	.|.	.|.	.|.	.|.	32|30	.|.	34|32	.|.	32|32	.|.	.|.	.|.	32|32	.|.	34|32	34|32	34|34	34|32	32|30	34|34	34|32	34|34	36|34
chr10:55857950-55857992	.|.	.|.	.|.	30|32	.|.	.|.	.|.	.|.	.|.	.|.	.|.	.|.	.|.	.|.	.|.	.|.	.|.	30|32	.|.	.|.	.|.	.|.	30|32	.|.	.|.	.|.	.|.	.|.	.|.	.|.	.|.	.|.	.|.	.|.	.|.	.|.	.|.	.|.	.|.	.|.	.|.	.|.	.|.	.|.	.|.	.|.	.|.	.|.	.|.
chr10:56073890-56073924	.|.	.|.	.|.	.|.	22|24	.|.	.|.	24|26	22|24	.|.	.|.	.|.	.|.	.|.	.|.	.|.	22|24	.|.	22|24	22|24	.|.	.|.	.|.	.|.	22|24	.|.	.|.	.|.	.|.	.|.	.|.	.|.	.|.	.|.	.|.	.|.	.|.	.|.	22|24	.|.	22|24	.|.	.|.	.|.	.|.	.|.	.|.	.|.	.|.
chr10:56076289-56076335	.|.	.|.	.|.	.|.	.|.	.|.	.|.	.|.	.|.	.|.	.|.	.|.	38|38	.|.	.|.	.|.	.|.	.|.	.|.	.|.	.|.	.|.	.|.	.|.	.|.	.|.	.|.	36|38	.|.	.|.	.|.	.|.	.|.	.|.	.|.	.|.	38|40	.|.	.|.	.|.	.|.	.|.	.|.	.|.	.|.	.|.	.|.	.|.	.|.
chr10:56249605-56249629	.|.	.|.	.|.	.|.	24|24	.|.	.|.	.|.	24|24	.|.	24|24	.|.	.|.	24|24	.|.	24|24	.|.	.|.	.|.	.|.	.|.	24|24	.|.	.|.	24|24	.|.	.|.	.|.	24|24	.|.	.|.	.|.	.|.	.|.	.|.	.|.	.|.	.|.	.|.	.|.	24|24	.|.	.|.	.|.	.|.	.|.	.|.	.|.	.|.
chr10:56272119-56272161	.|.	.|.	.|.	.|.	.|.	.|.	.|.	.|.	.|.	.|.	.|.	.|.	.|.	.|.	.|.	.|.	.|.	.|.	.|.	.|.	.|.	.|.	.|.	.|.	.|.	.|.	.|.	.|.	.|.	.|.	.|.	.|.	.|.	.|.	.|.	.|.	.|.	.|.	.|.	.|.	.|.	.|.	.|.	.|.	46|50	.|.	.|.	.|.	.|.
chr10:56557267-56557311	.|.	.|.	.|.	.|.	.|.	.|.	.|.	.|.	.|.	34|34	.|.	.|.	.|.	.|.	.|.	.|.	.|.	.|.	.|.	.|.	.|.	.|.	.|.	.|.	.|.	.|.	36|38	.|.	.|.	36|38	34|36	.|.	.|.	.|.	.|.	.|.	.|.	.|.	.|.	.|.	.|.	.|.	.|.	.|.	.|.	.|.	.|.	.|.	34|36
chr10:56644240-56644270	.|.	.|.	.|.	.|.	.|.	.|.	.|.	.|.	.|.	.|.	.|.	34|36	34|36	.|.	.|.	.|.	.|.	.|.	.|.	.|.	.|.	.|.	.|.	.|.	26|26	.|.	.|.	.|.	.|.	.|.	.|.	26|26	.|.	.|.	.|.	.|.	.|.	.|.	.|.	.|.	.|.	.|.	.|.	.|.	.|.	24|34	.|.	.|.	.|.
chr10:57259164-57259212	.|.	.|.	.|.	.|.	.|.	.|.	.|.	.|.	.|.	.|.	.|.	.|.	.|.	.|.	.|.	.|.	.|.	.|.	.|.	.|.	.|.	.|.	38|40	.|.	.|.	.|.	.|.	.|.	.|.	40|40	.|.	.|.	.|.	.|.	.|.	.|.	.|.	40|40	.|.	.|.	.|.	.|.	40|42	.|.	.|.	.|.	.|.	.|.	.|.
chr10:57470145-57470171	.|.	.|.	.|.	.|.	.|.	.|.	.|.	.|.	.|.	.|.	.|.	.|.	.|.	.|.	.|.	.|.	.|.	.|.	.|.	20|20	.|.	.|.	.|.	.|.	.|.	.|.	.|.	.|.	.|.	.|.	20|20	.|.	.|.	.|.	.|.	.|.	.|.	.|.	.|.	.|.	.|.	.|.	.|.	.|.	.|.	.|.	.|.	.|.	.|.
chr10:57555345-57555373	.|.	.|.	.|.	.|.	22|22	.|.	.|.	.|.	26|26	.|.	.|.	.|.	.|.	.|.	.|.	.|.	.|.	.|.	.|.	24|26	.|.	.|.	.|.	.|.	.|.	.|.	22|22	.|.	.|.	.|.	.|.	.|.	.|.	.|.	.|.	.|.	.|.	.|.	.|.	.|.	.|.	.|.	.|.	.|.	.|.	26|26	.|.	.|.	.|.
chr10:57626098-57626128	.|.	32|34	.|.	.|.	28|28	.|.	.|.	.|.	32|34	.|.	.|.	.|.	.|.	.|.	.|.	.|.	.|.	.|.	.|.	.|.	32|34	.|.	.|.	34|34	28|28	28|34	28|28	26|28	30|28	.|.	.|.	.|.	.|.	.|.	28|28	.|.	.|.	.|.	28|28	.|.	.|.	32|34	.|.	34|34	28|34	.|.	32|34	.|.	34|34
chr10:57718173-57718207	.|.	.|.	.|.	.|.	.|.	.|.	.|.	.|.	.|.	.|.	.|.	.|.	.|.	50|52	.|.	.|.	.|.	.|.	.|.	.|.	.|.	.|.	.|.	.|.	.|.	.|.	.|.	.|.	.|.	64|68	.|.	.|.	.|.	.|.	.|.	.|.	.|.	.|.	.|.	.|.	.|.	.|.	.|.	.|.	.|.	.|.	.|.	.|.	.|.
chr10:57802672-57802698	22|22	.|.	.|.	.|.	.|.	.|.	.|.	.|.	22|22	.|.	.|.	.|.	.|.	.|.	.|.	.|.	.|.	.|.	.|.	40|40	.|.	.|.	.|.	.|.	.|.	.|.	.|.	38|42	.|.	.|.	22|22	.|.	.|.	.|.	.|.	.|.	.|.	.|.	.|.	.|.	.|.	.|.	.|.	.|.	.|.	.|.	40|40	.|.	.|.
chr10:58029939-58029965	.|.	.|.	.|.	.|.	.|.	.|.	.|.	.|.	.|.	26|26	.|.	.|.	.|.	.|.	.|.	.|.	.|.	.|.	20|22	.|.	.|.	.|.	.|.	.|.	.|.	.|.	.|.	.|.	.|.	.|.	.|.	.|.	.|.	.|.	.|.	.|.	.|.	.|.	.|.	.|.	.|.	.|.	.|.	.|.	.|.	.|.	.|.	.|.	.|.
chr10:58501365-58501405	24|24	24|24	24|24	24|24	24|24	24|24	24|24	24|24	24|24	22|24	.|.	24|24	24|24	24|24	24|24	.|.	24|24	24|24	.|.	24|24	24|24	24|24	24|24	24|24	24|24	24|24	24|24	24|24	24|24	.|.	24|24	.|.	24|24	.|.	.|.	24|24	24|24	24|24	24|26	24|24	24|24	24|24	22|24	.|.	24|24	24|24	24|24	.|.	24|24
chr10:58730596-58730636	.|.	.|.	.|.	.|.	.|.	40|46	.|.	.|.	.|.	.|.	.|.	.|.	.|.	.|.	.|.	.|.	.|.	.|.	.|.	.|.	.|.	.|.	.|.	.|.	.|.	.|.	46|50	.|.	.|.	50|48	.|.	.|.	.|.	.|.	.|.	.|.	.|.	.|.	.|.	.|.	.|.	.|.	.|.	.|.	.|.	.|.	.|.	.|.	.|.
chr10:59775912-59775956	.|.	.|.	.|.	.|.	.|.	.|.	.|.	.|.	.|.	.|.	.|.	.|.	.|.	.|.	.|.	.|.	.|.	.|.	52|54	.|.	54|56	.|.	.|.	.|.	.|.	.|.	.|.	.|.	.|.	.|.	54|58	.|.	.|.	.|.	.|.	.|.	.|.	.|.	.|.	58|58	52|56	38|38	.|.	38|38	.|.	.|.	52|54	.|.	.|.
chr10:60240848-60240878	28|28	28|28	.|.	.|.	28|28	.|.	.|.	.|.	.|.	.|.	.|.	.|.	.|.	.|.	.|.	.|.	.|.	.|.	.|.	24|28	28|28	.|.	.|.	.|.	.|.	.|.	28|28	.|.	.|.	.|.	28|28	.|.	28|28	28|28	.|.	.|.	.|.	.|.	.|.	.|.	.|.	.|.	.|.	.|.	26|28	28|28	.|.	28|28	.|.
chr10:60343815-60343859	.|.	.|.	.|.	.|.	.|.	30|32	30|32	.|.	.|.	.|.	.|.	38|38	.|.	.|.	.|.	.|.	.|.	.|.	.|.	32|36	.|.	.|.	30|32	.|.	.|.	.|.	.|.	36|36	32|38	.|.	30|32	.|.	.|.	.|.	.|.	34|36	34|36	.|.	.|.	30|32	32|36	.|.	36|36	.|.	34|36	30|32	30|32	.|.	.|.
chr10:60894949-60894993	.|.	.|.	.|.	.|.	.|.	.|.	.|.	.|.	.|.	.|.	.|.	.|.	.|.	.|.	.|.	.|.	.|.	.|.	.|.	.|.	.|.	.|.	.|.	.|.	.|.	.|.	32|36	.|.	.|.	.|.	.|.	.|.	.|.	.|.	.|.	.|.	.|.	36|38	.|.	.|.	.|.	34|38	.|.	.|.	.|.	.|.	.|.	.|.	.|.
chr10:61076886-61076914	.|.	.|.	.|.	.|.	.|.	.|.	.|.	.|.	.|.	.|.	.|.	.|.	.|.	28|30	.|.	.|.	28|24	.|.	.|.	.|.	.|.	.|.	.|.	.|.	.|.	.|.	.|.	.|.	.|.	.|.	.|.	.|.	.|.	.|.	.|.	.|.	.|.	.|.	.|.	.|.	.|.	.|.	.|.	.|.	.|.	28|30	.|.	.|.	.|.
chr10:61411521-61411545	.|.	.|.	.|.	.|.	.|.	.|.	.|.	.|.	.|.	.|.	.|.	.|.	.|.	.|.	.|.	.|.	.|.	.|.	.|.	.|.	.|.	.|.	.|.	.|.	.|.	.|.	36|38	34|38	.|.	.|.	.|.	.|.	.|.	.|.	.|.	.|.	.|.	.|.	.|.	.|.	26|26	.|.	.|.	36|38	.|.	.|.	.|.	.|.	.|.
chr10:61719823-61719851	.|.	.|.	.|.	.|.	.|.	.|.	.|.	.|.	.|.	.|.	.|.	.|.	.|.	.|.	.|.	.|.	.|.	.|.	.|.	.|.	.|.	.|.	.|.	.|.	.|.	.|.	.|.	.|.	.|.	.|.	.|.	.|.	.|.	.|.	20|20	.|.	.|.	.|.	20|20	.|.	.|.	.|.	20|20	.|.	.|.	.|.	.|.	.|.	.|.
chr10:61737007-61737041	.|.	.|.	.|.	.|.	.|.	.|.	.|.	.|.	.|.	.|.	.|.	.|.	.|.	.|.	.|.	.|.	38|38	.|.	.|.	.|.	.|.	.|.	.|.	40|40	.|.	.|.	.|.	.|.	36|38	.|.	.|.	.|.	.|.	.|.	.|.	.|.	.|.	.|.	.|.	.|.	.|.	38|38	.|.	.|.	.|.	.|.	.|.	.|.	.|.
chr10:61838932-61838984	.|.	.|.	.|.	46|50	.|.	.|.	.|.	.|.	.|.	.|.	.|.	.|.	.|.	.|.	.|.	.|.	.|.	.|.	.|.	52|54	.|.	.|.	.|.	.|.	.|.	.|.	.|.	.|.	.|.	.|.	.|.	.|.	.|.	.|.	.|.	.|.	.|.	.|.	40|42	.|.	52|54	.|.	.|.	42|42	.|.	.|.	.|.	.|.	.|.
chr10:62308898-62308932	.|.	.|.	.|.	.|.	.|.	.|.	.|.	.|.	.|.	.|.	.|.	.|.	.|.	.|.	.|.	.|.	.|.	.|.	.|.	28|30	28|30	.|.	28|30	26|26	24|26	.|.	.|.	.|.	28|30	.|.	.|.	.|.	.|.	24|26	.|.	.|.	.|.	.|.	28|30	.|.	28|30	.|.	28|30	.|.	.|.	.|.	.|.	24|26	.|.
chr10:62990799-62990823	.|.	.|.	.|.	.|.	.|.	.|.	.|.	.|.	.|.	.|.	.|.	.|.	.|.	.|.	.|.	.|.	24|24	.|.	.|.	.|.	.|.	.|.	.|.	.|.	.|.	.|.	.|.	24|24	.|.	.|.	.|.	.|.	.|.	.|.	24|24	.|.	.|.	.|.	.|.	.|.	24|24	.|.	.|.	.|.	.|.	.|.	.|.	.|.	.|.
chr10:63216838-63216866	.|.	26|26	.|.	.|.	.|.	.|.	.|.	.|.	.|.	.|.	.|.	.|.	.|.	.|.	.|.	.|.	.|.	.|.	.|.	.|.	28|26	.|.	.|.	.|.	.|.	.|.	.|.	.|.	.|.	.|.	26|26	.|.	.|.	.|.	.|.	.|.	.|.	.|.	.|.	.|.	.|.	.|.	.|.	.|.	.|.	26|26	.|.	.|.	.|.
chr10:64122685-64122709	.|.	.|.	.|.	.|.	.|.	.|.	.|.	.|.	.|.	.|.	.|.	.|.	.|.	.|.	.|.	.|.	.|.	24|24	.|.	.|.	.|.	.|.	.|.	.|.	.|.	24|24	.|.	.|.	.|.	.|.	.|.	.|.	24|24	.|.	.|.	.|.	.|.	.|.	.|.	.|.	24|24	.|.	.|.	.|.	.|.	.|.	.|.	.|.	.|.
chr10:64167334-64167364	.|.	.|.	.|.	.|.	.|.	.|.	.|.	.|.	.|.	.|.	.|.	.|.	30|30	.|.	30|30	.|.	30|30	.|.	.|.	.|.	.|.	.|.	.|.	.|.	.|.	.|.	30|25	.|.	.|.	.|.	30|30	.|.	30|30	.|.	.|.	.|.	.|.	30|30	30|20	30|30	.|.	.|.	30|30	.|.	.|.	.|.	.|.	.|.	30|30
chr10:64218226-64218256	.|.	.|.	.|.	.|.	.|.	.|.	.|.	.|.	.|.	.|.	.|.	36|38	.|.	.|.	.|.	.|.	.|.	40|42	.|.	.|.	.|.	36|38	.|.	.|.	.|.	.|.	.|.	.|.	.|.	.|.	.|.	.|.	.|.	.|.	40|44	.|.	.|.	.|.	.|.	.|.	.|.	.|.	.|.	.|.	.|.	.|.	.|.	.|.	.|.
chr10:6455436-6455468	.|.	.|.	.|.	.|.	24|24	.|.	24|24	22|22	.|.	.|.	.|.	.|.	24|24	.|.	22|22	24|24	.|.	.|.	24|24	22|24	24|24	.|.	22|22	22|22	22|22	24|24	22|24	22|24	20|22	.|.	24|24	.|.	20|24	22|22	24|24	22|24	.|.	.|.	22|22	22|22	22|22	24|24	.|.	.|.	.|.	22|24	24|24	.|.	24|24
chr10:64662652-64662690	.|.	.|.	.|.	.|.	.|.	.|.	.|.	.|.	.|.	.|.	.|.	.|.	.|.	.|.	52|52	.|.	.|.	.|.	.|.	40|42	.|.	40|42	.|.	.|.	.|.	.|.	42|44	.|.	.|.	.|.	54|52	.|.	44|52	52|54	.|.	.|.	.|.	.|.	38|42	.|.	.|.	.|.	.|.	.|.	40|40	40|54	42|44	.|.	.|.
chr10:64809902-64809946	.|.	32|32	.|.	.|.	.|.	.|.	.|.	.|.	.|.	.|.	.|.	.|.	.|.	.|.	.|.	.|.	.|.	.|.	.|.	.|.	.|.	.|.	.|.	.|.	.|.	.|.	.|.	.|.	.|.	32|32	.|.	.|.	40|40	.|.	.|.	.|.	.|.	.|.	.|.	.|.	.|.	.|.	.|.	.|.	.|.	.|.	.|.	.|.	.|.
chr10:65537694-65537718	.|.	.|.	24|24	.|.	.|.	.|.	24|24	24|24	.|.	.|.	.|.	24|24	.|.	24|24	.|.	24|24	.|.	.|.	.|.	24|24	.|.	.|.	.|.	.|.	24|24	24|24	24|24	.|.	24|24	.|.	24|24	.|.	24|24	24|24	.|.	24|24	24|24	.|.	24|24	.|.	24|24	24|24	24|24	.|.	.|.	24|24	24|24	24|24	.|.
chr10:66036761-66036801	.|.	.|.	.|.	.|.	.|.	.|.	.|.	.|.	.|.	.|.	.|.	.|.	.|.	.|.	.|.	.|.	.|.	.|.	.|.	.|.	.|.	.|.	.|.	.|.	.|.	.|.	.|.	.|.	.|.	.|.	.|.	.|.	.|.	.|.	.|.	.|.	.|.	.|.	.|.	.|.	.|.	.|.	.|.	.|.	.|.	.|.	.|.	.|.	.|.
chr10:66178147-66178193	.|.	30|32	.|.	.|.	.|.	.|.	.|.	.|.	.|.	.|.	.|.	.|.	.|.	.|.	.|.	.|.	.|.	.|.	.|.	.|.	.|.	.|.	.|.	.|.	.|.	.|.	.|.	.|.	.|.	.|.	.|.	.|.	.|.	.|.	36|40	.|.	.|.	.|.	.|.	.|.	.|.	.|.	.|.	.|.	.|.	.|.	.|.	.|.	.|.
chr10:66516879-66516909	.|.	.|.	.|.	26|28	.|.	.|.	.|.	.|.	.|.	.|.	.|.	.|.	.|.	.|.	.|.	.|.	.|.	.|.	.|.	.|.	.|.	.|.	.|.	.|.	.|.	.|.	.|.	.|.	.|.	.|.	.|.	.|.	.|.	.|.	.|.	.|.	.|.	.|.	.|.	.|.	.|.	26|28	.|.	26|28	.|.	.|.	.|.	.|.	.|.
chr10:66817338-66817386	38|40	32|42	32|32	.|.	38|40	32|38	.|.	32|40	32|32	.|.	32|32	.|.	.|.	36|40	32|38	.|.	.|.	.|.	.|.	32|40	32|32	32|36	40|40	32|40	32|40	40|42	36|40	38|40	38|40	.|.	34|40	40|40	38|40	34|38	36|40	32|32	.|.	38|40	38|42	32|40	.|.	.|.	34|40	38|40	32|32	38|40	34|40	38|38	38|40
chr10:67274480-67274514	.|.	.|.	.|.	.|.	24|24	.|.	.|.	.|.	.|.	.|.	.|.	.|.	.|.	.|.	.|.	.|.	.|.	.|.	.|.	26|26	26|26	.|.	.|.	.|.	.|.	.|.	.|.	.|.	24|24	.|.	.|.	.|.	.|.	.|.	.|.	.|.	.|.	24|24	.|.	24|24	.|.	.|.	24|24	.|.	.|.	.|.	.|.	.|.	.|.
chr10:67913606-67913636	.|.	36|38	.|.	.|.	.|.	.|.	.|.	.|.	.|.	.|.	.|.	.|.	.|.	.|.	.|.	.|.	.|.	.|.	.|.	32|34	.|.	.|.	.|.	.|.	.|.	.|.	.|.	.|.	.|.	.|.	.|.	.|.	.|.	.|.	.|.	.|.	.|.	36|38	.|.	.|.	.|.	.|.	.|.	.|.	.|.	.|.	.|.	.|.	.|.
chr10:68141314-68141342	.|.	.|.	.|.	28|28	28|28	.|.	28|28	.|.	.|.	.|.	28|28	28|28	.|.	.|.	28|28	.|.	.|.	.|.	.|.	.|.	28|28	.|.	28|28	28|28	28|28	28|28	28|28	28|28	28|28	.|.	28|28	28|28	.|.	28|28	.|.	28|28	.|.	28|28	28|24	28|28	28|28	28|28	28|28	.|.	28|28	.|.	28|28	.|.	28|28
chr10:68239708-68239736	.|.	.|.	28|26	24|26	.|.	.|.	28|26	.|.	28|26	.|.	.|.	26|26	.|.	28|26	.|.	.|.	.|.	.|.	.|.	26|26	28|26	.|.	.|.	.|.	.|.	.|.	28|28	.|.	28|26	.|.	26|26	.|.	.|.	26|26	.|.	.|.	28|28	26|26	.|.	22|26	28|26	26|26	26|26	.|.	26|26	.|.	.|.	26|26	26|26
chr10:68246576-68246604	.|.	26|26	24|26	.|.	.|.	.|.	.|.	26|26	26|26	.|.	24|26	.|.	.|.	.|.	.|.	.|.	26|26	.|.	.|.	26|26	26|26	26|26	26|26	.|.	26|26	26|26	.|.	.|.	.|.	.|.	.|.	26|26	26|26	.|.	.|.	26|26	.|.	.|.	.|.	26|26	26|26	26|26	.|.	26|26	.|.	.|.	.|.	26|26	.|.
chr10:68386688-68386715	.|.	.|.	.|.	.|.	.|.	.|.	.|.	.|.	.|.	.|.	.|.	.|.	.|.	.|.	.|.	.|.	.|.	.|.	.|.	.|.	.|.	.|.	.|.	.|.	.|.	.|.	.|.	.|.	.|.	27|24	.|.	.|.	.|.	.|.	.|.	.|.	.|.	.|.	.|.	.|.	27|24	.|.	.|.	.|.	.|.	.|.	.|.	.|.	.|.
chr10:6896798-6896846	.|.	.|.	.|.	.|.	.|.	.|.	.|.	44|46	.|.	.|.	.|.	.|.	40|42	.|.	.|.	.|.	.|.	.|.	.|.	.|.	.|.	.|.	42|42	.|.	.|.	.|.	.|.	.|.	40|42	.|.	.|.	.|.	.|.	.|.	.|.	40|42	40|42	48|46	.|.	.|.	.|.	.|.	.|.	.|.	.|.	.|.	.|.	.|.	.|.
chr10:69391884-69391924	.|.	.|.	.|.	40|42	.|.	.|.	.|.	.|.	.|.	.|.	.|.	.|.	.|.	.|.	30|30	.|.	.|.	.|.	.|.	.|.	.|.	.|.	.|.	.|.	.|.	.|.	.|.	.|.	.|.	.|.	.|.	.|.	.|.	.|.	.|.	.|.	.|.	.|.	.|.	.|.	.|.	.|.	.|.	.|.	.|.	.|.	.|.	.|.	.|.
chr10:69492644-69492670	.|.	.|.	.|.	.|.	.|.	.|.	.|.	.|.	.|.	.|.	.|.	.|.	.|.	.|.	.|.	.|.	.|.	.|.	.|.	26|24	26|26	.|.	.|.	.|.	.|.	.|.	26|26	.|.	.|.	26|24	26|24	.|.	.|.	.|.	.|.	.|.	.|.	.|.	.|.	.|.	26|24	.|.	.|.	.|.	26|26	.|.	.|.	.|.	.|.
chr10:69878634-69878682	.|.	.|.	.|.	.|.	.|.	.|.	.|.	48|48	.|.	.|.	.|.	.|.	.|.	48|48	.|.	.|.	.|.	.|.	44|44	.|.	48|48	.|.	.|.	.|.	.|.	.|.	48|48	48|48	.|.	.|.	.|.	.|.	.|.	.|.	.|.	48|44	.|.	.|.	.|.	48|48	.|.	.|.	.|.	.|.	.|.	48|48	.|.	.|.	.|.
chr10:69953554-69953596	.|.	.|.	.|.	.|.	.|.	.|.	.|.	.|.	.|.	.|.	.|.	.|.	.|.	.|.	.|.	.|.	.|.	.|.	.|.	.|.	.|.	.|.	.|.	34|34	.|.	.|.	.|.	.|.	.|.	.|.	.|.	.|.	.|.	.|.	.|.	.|.	.|.	.|.	.|.	.|.	.|.	.|.	.|.	.|.	.|.	34|34	.|.	.|.	.|.
chr10:70997033-70997073	.|.	.|.	.|.	.|.	.|.	.|.	.|.	.|.	.|.	.|.	.|.	30|32	.|.	.|.	.|.	.|.	.|.	.|.	.|.	.|.	.|.	.|.	.|.	.|.	40|42	.|.	.|.	.|.	.|.	.|.	.|.	.|.	.|.	.|.	.|.	.|.	.|.	.|.	.|.	.|.	.|.	.|.	.|.	.|.	.|.	.|.	.|.	.|.	.|.
chr10:71184175-71184213	.|.	.|.	.|.	.|.	.|.	.|.	.|.	.|.	26|32	.|.	.|.	.|.	.|.	.|.	.|.	.|.	.|.	.|.	.|.	.|.	.|.	.|.	.|.	.|.	30|32	.|.	.|.	.|.	.|.	.|.	.|.	.|.	.|.	.|.	28|28	28|32	.|.	.|.	30|32	.|.	.|.	.|.	.|.	.|.	.|.	.|.	30|32	.|.	.|.
chr10:72975563-72975599	26|28	26|28	.|.	.|.	26|28	26|28	28|28	26|28	26|28	.|.	.|.	.|.	.|.	.|.	.|.	26|28	.|.	.|.	.|.	28|28	28|28	.|.	26|28	26|28	26|28	26|28	28|28	26|28	.|.	.|.	26|28	.|.	.|.	.|.	.|.	26|28	.|.	.|.	.|.	26|28	26|28	.|.	.|.	.|.	.|.	24|28	26|28	.|.	.|.
chr10:7377544-7377582	.|.	.|.	.|.	.|.	.|.	.|.	.|.	.|.	.|.	.|.	.|.	32|32	.|.	.|.	.|.	.|.	.|.	.|.	.|.	.|.	.|.	.|.	.|.	.|.	.|.	.|.	.|.	42|42	.|.	.|.	.|.	.|.	.|.	40|42	.|.	.|.	40|42	.|.	.|.	.|.	.|.	.|.	.|.	.|.	.|.	.|.	.|.	.|.	.|.
chr10:74249048-74249082	.|.	.|.	.|.	.|.	.|.	.|.	.|.	.|.	.|.	.|.	.|.	.|.	.|.	.|.	.|.	.|.	.|.	.|.	.|.	.|.	.|.	.|.	.|.	.|.	.|.	.|.	.|.	.|.	.|.	.|.	.|.	.|.	.|.	.|.	.|.	.|.	.|.	.|.	.|.	.|.	.|.	.|.	.|.	.|.	.|.	.|.	.|.	.|.	.|.
chr10:74452931-74452957	26|26	.|.	.|.	24|26	24|26	.|.	.|.	.|.	.|.	26|26	.|.	24|26	.|.	.|.	.|.	.|.	.|.	.|.	.|.	.|.	24|26	.|.	.|.	.|.	24|26	.|.	.|.	.|.	26|26	.|.	.|.	.|.	24|26	24|26	.|.	.|.	26|26	.|.	.|.	.|.	24|26	.|.	.|.	.|.	24|26	.|.	24|26	26|26	.|.
chr10:74467364-74467406	.|.	.|.	.|.	.|.	.|.	36|38	.|.	.|.	36|36	36|36	.|.	.|.	.|.	.|.	36|36	.|.	.|.	36|36	.|.	34|36	36|36	36|36	34|36	.|.	36|36	34|34	.|.	.|.	.|.	.|.	34|38	.|.	.|.	.|.	.|.	36|38	.|.	.|.	.|.	36|38	.|.	.|.	.|.	.|.	.|.	.|.	.|.	.|.	34|36
chr10:74540269-74540309	.|.	.|.	.|.	.|.	.|.	.|.	.|.	.|.	.|.	.|.	.|.	.|.	.|.	.|.	.|.	.|.	.|.	.|.	.|.	.|.	.|.	.|.	.|.	.|.	.|.	.|.	.|.	.|.	.|.	.|.	.|.	.|.	.|.	.|.	.|.	.|.	.|.	.|.	.|.	.|.	.|.	.|.	.|.	.|.	.|.	.|.	.|.	.|.	.|.
chr10:74592692-74592718	.|.	42|46	.|.	.|.	.|.	.|.	.|.	.|.	.|.	.|.	.|.	.|.	.|.	.|.	.|.	.|.	.|.	.|.	.|.	.|.	.|.	.|.	.|.	.|.	.|.	.|.	.|.	.|.	.|.	.|.	.|.	.|.	.|.	.|.	.|.	.|.	.|.	.|.	.|.	.|.	.|.	.|.	.|.	.|.	.|.	.|.	.|.	.|.	.|.
chr10:74747424-74747462	.|.	.|.	.|.	.|.	.|.	.|.	.|.	.|.	.|.	.|.	.|.	.|.	.|.	.|.	.|.	.|.	.|.	.|.	.|.	.|.	.|.	.|.	.|.	.|.	.|.	.|.	.|.	.|.	.|.	38|40	.|.	.|.	.|.	.|.	.|.	.|.	.|.	.|.	.|.	.|.	.|.	.|.	.|.	44|48	.|.	.|.	46|48	.|.	.|.
chr10:74788065-74788103	.|.	.|.	.|.	32|32	.|.	.|.	.|.	.|.	.|.	38|40	.|.	.|.	.|.	.|.	.|.	.|.	.|.	.|.	.|.	32|32	.|.	.|.	.|.	.|.	.|.	.|.	30|32	38|40	.|.	.|.	.|.	.|.	32|32	.|.	.|.	.|.	.|.	.|.	32|32	.|.	32|32	.|.	38|40	30|32	.|.	.|.	.|.	32|32	.|.
chr10:75418566-75418604	.|.	.|.	.|.	.|.	.|.	.|.	.|.	.|.	.|.	.|.	.|.	.|.	.|.	.|.	.|.	.|.	.|.	.|.	.|.	.|.	.|.	.|.	.|.	.|.	.|.	.|.	.|.	.|.	.|.	.|.	.|.	.|.	.|.	.|.	.|.	.|.	.|.	.|.	.|.	38|36	.|.	.|.	.|.	.|.	.|.	.|.	.|.	38|38	.|.
chr10:76009254-76009284	.|.	.|.	.|.	.|.	.|.	.|.	.|.	.|.	.|.	.|.	.|.	.|.	26|28	.|.	.|.	.|.	.|.	.|.	.|.	.|.	.|.	.|.	.|.	.|.	.|.	.|.	.|.	.|.	.|.	.|.	.|.	.|.	.|.	.|.	24|28	.|.	.|.	.|.	.|.	.|.	24|24	.|.	.|.	24|24	.|.	.|.	.|.	.|.	.|.
chr10:77644003-77644049	48|50	50|50	.|.	.|.	44|44	.|.	.|.	44|44	.|.	.|.	.|.	.|.	.|.	.|.	.|.	.|.	.|.	.|.	.|.	50|50	46|44	46|50	44|50	50|50	.|.	.|.	.|.	.|.	40|42	.|.	46|44	.|.	44|44	.|.	.|.	50|52	.|.	.|.	46|44	.|.	.|.	.|.	44|52	.|.	44|44	50|54	.|.	.|.	.|.
chr10:78058914-78058946	26|28	.|.	.|.	.|.	.|.	.|.	.|.	.|.	.|.	26|28	.|.	26|28	.|.	.|.	.|.	.|.	.|.	.|.	.|.	.|.	.|.	.|.	28|28	28|28	26|28	26|28	26|28	.|.	28|28	.|.	26|28	.|.	.|.	.|.	26|28	26|28	.|.	.|.	.|.	.|.	26|28	.|.	.|.	26|28	.|.	.|.	.|.	26|28	.|.
chr10:78113088-78113120	.|.	.|.	.|.	.|.	.|.	.|.	.|.	.|.	.|.	.|.	.|.	30|44	.|.	.|.	44|44	.|.	.|.	.|.	.|.	.|.	44|44	.|.	.|.	44|46	.|.	.|.	30|44	30|30	.|.	.|.	.|.	.|.	.|.	.|.	42|44	.|.	.|.	.|.	30|30	42|44	30|44	44|44	.|.	42|44	30|30	.|.	30|30	30|30	.|.
chr10:78331638-78331672	.|.	.|.	.|.	.|.	.|.	.|.	.|.	.|.	.|.	.|.	.|.	.|.	38|40	.|.	.|.	.|.	.|.	.|.	.|.	.|.	.|.	.|.	.|.	.|.	.|.	.|.	.|.	34|36	.|.	.|.	.|.	.|.	34|36	.|.	.|.	40|42	34|36	.|.	.|.	.|.	34|34	40|42	.|.	.|.	.|.	.|.	.|.	.|.	.|.
chr10:78551428-78551462	.|.	.|.	.|.	.|.	.|.	.|.	.|.	.|.	.|.	.|.	.|.	.|.	.|.	.|.	.|.	.|.	.|.	.|.	.|.	.|.	.|.	.|.	.|.	.|.	.|.	.|.	.|.	.|.	.|.	.|.	.|.	.|.	.|.	.|.	.|.	.|.	.|.	.|.	.|.	.|.	.|.	.|.	.|.	.|.	.|.	.|.	.|.	.|.	.|.
chr10:78656769-78656805	.|.	.|.	.|.	.|.	.|.	.|.	.|.	.|.	.|.	42|44	.|.	.|.	.|.	46|48	.|.	.|.	.|.	.|.	.|.	42|44	.|.	.|.	.|.	.|.	.|.	.|.	.|.	.|.	42|44	.|.	.|.	.|.	.|.	.|.	.|.	42|44	.|.	.|.	.|.	.|.	.|.	.|.	.|.	.|.	.|.	.|.	.|.	.|.	.|.
chr10:79002657-79002697	.|.	.|.	.|.	.|.	.|.	.|.	.|.	.|.	.|.	.|.	.|.	.|.	.|.	.|.	.|.	.|.	.|.	.|.	.|.	.|.	.|.	.|.	.|.	.|.	.|.	.|.	.|.	.|.	.|.	.|.	.|.	.|.	.|.	.|.	.|.	.|.	.|.	.|.	.|.	.|.	.|.	.|.	.|.	.|.	.|.	.|.	.|.	.|.	.|.
chr10:79303908-79303948	.|.	.|.	.|.	.|.	.|.	.|.	.|.	.|.	.|.	.|.	.|.	.|.	.|.	.|.	.|.	.|.	.|.	.|.	.|.	.|.	.|.	.|.	.|.	.|.	.|.	.|.	.|.	.|.	.|.	.|.	.|.	.|.	.|.	.|.	.|.	.|.	.|.	.|.	.|.	.|.	.|.	.|.	.|.	.|.	.|.	.|.	.|.	.|.	.|.
chr10:79394538-79394572	.|.	.|.	.|.	.|.	.|.	.|.	.|.	.|.	.|.	.|.	.|.	.|.	.|.	.|.	.|.	.|.	.|.	.|.	.|.	.|.	.|.	.|.	.|.	.|.	.|.	.|.	.|.	.|.	.|.	.|.	.|.	26|28	.|.	.|.	.|.	.|.	.|.	.|.	.|.	.|.	.|.	.|.	.|.	.|.	.|.	.|.	.|.	.|.	.|.
chr10:8011102-8011130	28|28	28|28	.|.	20|20	.|.	.|.	.|.	20|20	20|20	.|.	.|.	.|.	.|.	.|.	.|.	.|.	.|.	.|.	.|.	.|.	.|.	28|28	28|28	20|20	.|.	.|.	.|.	.|.	.|.	.|.	.|.	.|.	28|28	.|.	.|.	.|.	28|20	.|.	28|20	.|.	.|.	.|.	.|.	.|.	.|.	.|.	.|.	.|.	.|.
chr10:80514741-80514771	.|.	.|.	.|.	.|.	30|30	30|32	.|.	.|.	.|.	.|.	.|.	30|50	.|.	.|.	48|50	.|.	.|.	.|.	.|.	.|.	.|.	.|.	46|50	.|.	.|.	.|.	30|30	.|.	48|50	.|.	.|.	.|.	.|.	48|50	32|50	.|.	.|.	.|.	.|.	.|.	46|50	32|50	.|.	.|.	.|.	46|50	.|.	48|52	.|.
chr10:81077552-81077596	.|.	.|.	.|.	.|.	.|.	.|.	.|.	.|.	.|.	.|.	.|.	.|.	.|.	.|.	.|.	.|.	.|.	.|.	.|.	.|.	.|.	48|48	.|.	.|.	.|.	.|.	.|.	.|.	.|.	.|.	50|50	.|.	.|.	52|52	.|.	.|.	.|.	.|.	.|.	.|.	.|.	.|.	.|.	46|50	.|.	48|52	.|.	.|.	.|.
chr10:81644630-81644664	.|.	.|.	.|.	.|.	.|.	.|.	.|.	.|.	.|.	.|.	.|.	.|.	.|.	.|.	.|.	.|.	.|.	.|.	.|.	.|.	.|.	26|26	.|.	.|.	.|.	.|.	.|.	.|.	.|.	.|.	.|.	.|.	.|.	.|.	.|.	.|.	.|.	.|.	26|26	.|.	.|.	.|.	.|.	.|.	.|.	.|.	.|.	.|.	.|.
chr10:82321784-82321818	.|.	.|.	.|.	.|.	.|.	.|.	.|.	30|32	.|.	.|.	.|.	.|.	32|36	.|.	.|.	.|.	.|.	.|.	.|.	.|.	.|.	.|.	.|.	.|.	34|36	.|.	32|36	.|.	30|32	30|32	34|36	.|.	34|36	.|.	.|.	34|36	.|.	.|.	34|36	.|.	.|.	30|32	.|.	30|32	.|.	.|.	.|.	.|.	.|.
chr10:82763748-82763786	.|.	26|26	.|.	.|.	.|.	.|.	.|.	.|.	.|.	.|.	.|.	.|.	.|.	.|.	.|.	.|.	.|.	.|.	.|.	26|26	.|.	.|.	.|.	.|.	.|.	.|.	.|.	.|.	.|.	.|.	.|.	.|.	.|.	.|.	.|.	.|.	.|.	.|.	.|.	.|.	.|.	.|.	.|.	.|.	.|.	.|.	.|.	.|.	.|.
chr10:82901122-82901150	28|28	.|.	.|.	28|28	28|28	.|.	.|.	.|.	.|.	.|.	.|.	.|.	28|28	.|.	28|28	.|.	.|.	.|.	28|28	.|.	28|28	28|28	.|.	28|28	.|.	28|28	28|28	28|28	28|28	28|28	28|28	28|28	28|28	.|.	.|.	.|.	28|28	.|.	28|28	28|28	28|28	.|.	28|28	28|28	28|28	.|.	.|.	28|28	.|.
chr10:82925804-82925828	.|.	.|.	.|.	.|.	.|.	.|.	.|.	.|.	.|.	.|.	.|.	.|.	.|.	.|.	.|.	.|.	.|.	.|.	.|.	.|.	.|.	.|.	.|.	.|.	.|.	.|.	.|.	.|.	.|.	.|.	.|.	.|.	.|.	.|.	24|24	.|.	24|24	24|24	.|.	.|.	.|.	.|.	.|.	24|24	24|24	.|.	24|24	.|.	.|.
chr10:83037957-83037985	.|.	.|.	28|28	.|.	.|.	28|28	28|26	.|.	.|.	.|.	.|.	.|.	.|.	.|.	.|.	.|.	28|26	.|.	.|.	28|26	.|.	.|.	28|26	28|26	28|26	.|.	.|.	28|26	.|.	28|26	28|26	.|.	28|26	28|26	.|.	.|.	28|26	.|.	.|.	.|.	.|.	.|.	.|.	28|26	28|26	.|.	.|.	.|.	.|.
chr10:83178820-83178856	.|.	.|.	.|.	.|.	.|.	.|.	.|.	.|.	.|.	.|.	.|.	.|.	.|.	.|.	.|.	.|.	.|.	.|.	.|.	.|.	.|.	.|.	.|.	.|.	.|.	.|.	.|.	.|.	.|.	.|.	30|30	32|34	.|.	.|.	.|.	.|.	.|.	.|.	.|.	.|.	.|.	.|.	.|.	.|.	34|34	.|.	.|.	.|.	.|.
chr10:83729528-83729556	.|.	.|.	.|.	.|.	.|.	.|.	.|.	.|.	.|.	.|.	.|.	.|.	.|.	.|.	.|.	.|.	.|.	.|.	.|.	22|26	.|.	.|.	.|.	.|.	.|.	.|.	.|.	.|.	.|.	.|.	.|.	.|.	.|.	.|.	.|.	.|.	.|.	.|.	.|.	.|.	.|.	.|.	22|22	.|.	.|.	.|.	.|.	.|.	.|.
chr10:83869291-83869333	.|.	.|.	.|.	.|.	.|.	.|.	.|.	.|.	.|.	.|.	.|.	.|.	.|.	.|.	.|.	.|.	.|.	.|.	.|.	.|.	.|.	.|.	.|.	.|.	.|.	.|.	.|.	.|.	32|36	.|.	.|.	.|.	.|.	.|.	30|32	.|.	.|.	.|.	.|.	.|.	.|.	.|.	.|.	.|.	.|.	.|.	.|.	34|36	.|.
chr10:84789616-84789644	.|.	.|.	.|.	.|.	.|.	.|.	.|.	.|.	.|.	.|.	.|.	.|.	.|.	.|.	.|.	.|.	.|.	.|.	.|.	.|.	.|.	.|.	.|.	.|.	.|.	.|.	.|.	.|.	.|.	.|.	.|.	.|.	.|.	.|.	.|.	.|.	.|.	.|.	.|.	.|.	.|.	.|.	.|.	.|.	.|.	.|.	.|.	.|.	.|.
chr10:86144760-86144790	.|.	.|.	.|.	.|.	.|.	.|.	.|.	.|.	.|.	.|.	.|.	.|.	.|.	.|.	.|.	.|.	.|.	.|.	.|.	.|.	.|.	.|.	.|.	.|.	.|.	.|.	.|.	.|.	.|.	.|.	.|.	.|.	.|.	.|.	.|.	.|.	.|.	.|.	.|.	.|.	.|.	.|.	.|.	.|.	.|.	.|.	.|.	.|.	.|.
chr10:86244246-86244272	.|.	26|26	.|.	.|.	26|22	26|26	.|.	.|.	.|.	.|.	.|.	.|.	.|.	22|22	.|.	.|.	.|.	.|.	.|.	26|22	.|.	.|.	26|26	.|.	.|.	.|.	.|.	.|.	.|.	.|.	.|.	26|24	26|24	22|22	.|.	22|22	.|.	.|.	.|.	22|22	.|.	26|26	.|.	.|.	.|.	.|.	26|26	.|.	.|.
chr10:86316485-86316511	.|.	.|.	.|.	.|.	.|.	.|.	.|.	.|.	.|.	.|.	.|.	.|.	.|.	.|.	.|.	.|.	.|.	.|.	.|.	.|.	.|.	.|.	.|.	.|.	.|.	.|.	.|.	.|.	26|28	.|.	.|.	.|.	.|.	.|.	.|.	.|.	.|.	.|.	.|.	.|.	.|.	.|.	.|.	.|.	.|.	.|.	.|.	.|.	.|.
chr10:86514102-86514130	32|32	.|.	.|.	.|.	28|32	.|.	.|.	.|.	32|32	28|28	.|.	.|.	30|32	.|.	32|32	30|30	.|.	32|32	.|.	.|.	.|.	.|.	.|.	.|.	.|.	30|32	.|.	.|.	.|.	.|.	32|32	.|.	.|.	.|.	.|.	28|28	.|.	.|.	30|30	.|.	32|32	28|28	.|.	32|32	.|.	.|.	.|.	30|32	.|.
chr10:86515897-86515933	.|.	.|.	.|.	.|.	38|38	.|.	.|.	.|.	38|38	.|.	.|.	.|.	.|.	.|.	38|38	.|.	.|.	46|48	.|.	44|48	.|.	.|.	46|48	40|48	.|.	42|48	.|.	46|48	38|38	.|.	.|.	.|.	48|48	.|.	46|48	38|38	.|.	46|48	38|38	.|.	36|48	38|38	.|.	46|48	46|48	42|48	38|48	46|48	38|38
chr10:86590668-86590706	.|.	.|.	40|44	.|.	.|.	.|.	.|.	.|.	.|.	.|.	.|.	.|.	.|.	.|.	.|.	.|.	.|.	.|.	34|34	.|.	.|.	.|.	.|.	.|.	.|.	.|.	.|.	.|.	.|.	.|.	40|44	.|.	.|.	.|.	34|34	.|.	.|.	.|.	.|.	.|.	.|.	.|.	40|44	.|.	.|.	.|.	.|.	.|.	.|.
chr10:8708732-8708774	.|.	.|.	.|.	.|.	.|.	.|.	.|.	.|.	.|.	.|.	.|.	.|.	.|.	.|.	.|.	.|.	.|.	.|.	.|.	.|.	.|.	.|.	.|.	.|.	.|.	.|.	.|.	.|.	.|.	.|.	.|.	.|.	.|.	.|.	.|.	40|44	.|.	.|.	.|.	.|.	.|.	.|.	.|.	.|.	.|.	.|.	.|.	.|.	.|.
chr10:87165051-87165081	.|.	.|.	.|.	.|.	.|.	.|.	.|.	.|.	.|.	.|.	.|.	.|.	.|.	.|.	.|.	.|.	.|.	.|.	.|.	.|.	.|.	.|.	.|.	.|.	.|.	.|.	.|.	.|.	.|.	.|.	.|.	.|.	.|.	.|.	.|.	.|.	.|.	.|.	.|.	.|.	.|.	.|.	.|.	.|.	.|.	.|.	.|.	.|.	.|.
chr10:87216556-87216580	24|24	.|.	.|.	.|.	.|.	.|.	.|.	.|.	.|.	.|.	.|.	.|.	.|.	.|.	.|.	.|.	.|.	24|24	.|.	.|.	.|.	22|22	.|.	.|.	.|.	.|.	22|22	.|.	.|.	.|.	.|.	.|.	.|.	.|.	.|.	24|24	.|.	.|.	.|.	24|24	.|.	24|24	.|.	22|22	.|.	.|.	24|24	.|.	.|.
chr10:87281140-87281188	38|42	.|.	.|.	.|.	.|.	.|.	.|.	.|.	.|.	.|.	.|.	.|.	.|.	.|.	.|.	.|.	.|.	.|.	.|.	.|.	.|.	.|.	.|.	.|.	.|.	.|.	.|.	.|.	.|.	.|.	.|.	.|.	.|.	.|.	.|.	.|.	.|.	.|.	.|.	.|.	.|.	.|.	.|.	.|.	.|.	.|.	.|.	.|.	.|.
chr10:8790472-8790504	34|36	34|36	.|.	.|.	34|36	.|.	.|.	.|.	36|38	.|.	.|.	.|.	.|.	34|36	.|.	.|.	.|.	.|.	.|.	.|.	.|.	.|.	.|.	.|.	.|.	32|34	.|.	34|36	.|.	.|.	.|.	.|.	.|.	34|36	34|36	34|36	.|.	.|.	34|36	34|36	34|36	.|.	.|.	.|.	.|.	34|36	.|.	34|36	34|36
chr10:88496503-88496549	.|.	.|.	.|.	.|.	.|.	.|.	.|.	.|.	.|.	.|.	.|.	.|.	.|.	.|.	.|.	.|.	.|.	.|.	.|.	.|.	.|.	.|.	.|.	.|.	.|.	.|.	.|.	.|.	38|40	.|.	.|.	.|.	.|.	.|.	.|.	.|.	.|.	.|.	.|.	.|.	.|.	.|.	.|.	.|.	38|40	.|.	.|.	.|.	.|.
chr10:88829615-88829639	.|.	.|.	.|.	.|.	.|.	.|.	.|.	.|.	.|.	.|.	.|.	.|.	.|.	.|.	21|21	.|.	.|.	.|.	.|.	.|.	.|.	.|.	.|.	.|.	.|.	.|.	.|.	.|.	.|.	.|.	.|.	.|.	.|.	.|.	.|.	.|.	.|.	.|.	.|.	.|.	.|.	.|.	.|.	.|.	.|.	.|.	.|.	.|.	.|.
chr10:89110905-89110945	.|.	.|.	.|.	.|.	.|.	.|.	.|.	44|46	.|.	.|.	.|.	.|.	.|.	.|.	.|.	.|.	.|.	42|40	.|.	.|.	.|.	.|.	.|.	.|.	.|.	.|.	.|.	40|40	.|.	.|.	40|40	.|.	40|40	44|44	.|.	.|.	.|.	.|.	.|.	.|.	.|.	40|40	.|.	.|.	42|44	44|46	42|44	.|.	.|.
chr10:89297268-89297306	.|.	.|.	.|.	.|.	.|.	.|.	.|.	.|.	.|.	.|.	.|.	.|.	41|45	.|.	.|.	.|.	.|.	.|.	29|31	.|.	.|.	.|.	.|.	.|.	.|.	.|.	.|.	.|.	.|.	.|.	.|.	.|.	.|.	.|.	.|.	.|.	.|.	.|.	39|43	.|.	.|.	.|.	.|.	.|.	.|.	.|.	.|.	.|.	.|.
chr10:89463033-89463073	34|34	.|.	.|.	34|34	.|.	.|.	.|.	.|.	.|.	.|.	.|.	.|.	.|.	.|.	.|.	46|48	.|.	.|.	.|.	34|46	.|.	44|46	.|.	44|44	34|34	.|.	.|.	.|.	.|.	.|.	44|46	.|.	.|.	.|.	34|34	.|.	.|.	.|.	.|.	34|34	.|.	.|.	34|34	.|.	34|46	44|46	34|46	34|46	.|.
chr10:90042235-90042283	.|.	.|.	.|.	.|.	.|.	.|.	.|.	.|.	.|.	.|.	.|.	32|34	.|.	.|.	.|.	32|34	.|.	.|.	.|.	.|.	.|.	.|.	.|.	.|.	.|.	.|.	.|.	.|.	.|.	.|.	.|.	.|.	.|.	.|.	.|.	.|.	.|.	.|.	.|.	.|.	.|.	.|.	.|.	32|34	.|.	32|34	.|.	.|.	.|.
chr10:90913755-90913789	.|.	.|.	.|.	.|.	.|.	.|.	.|.	.|.	.|.	34|32	.|.	.|.	.|.	.|.	.|.	.|.	.|.	.|.	.|.	.|.	.|.	.|.	.|.	34|34	.|.	.|.	.|.	34|32	.|.	.|.	.|.	.|.	.|.	.|.	.|.	.|.	.|.	.|.	.|.	.|.	.|.	.|.	.|.	.|.	.|.	.|.	.|.	.|.	.|.
chr10:90973049-90973104	.|.	55|55	.|.	.|.	.|.	.|.	.|.	.|.	.|.	.|.	.|.	70|70	.|.	.|.	.|.	.|.	.|.	.|.	.|.	.|.	.|.	.|.	.|.	.|.	55|55	.|.	.|.	.|.	.|.	.|.	70|70	55|55	.|.	.|.	.|.	.|.	.|.	.|.	.|.	.|.	.|.	.|.	.|.	55|55	.|.	.|.	.|.	.|.	.|.
chr10:91146703-91146729	.|.	.|.	.|.	.|.	.|.	.|.	.|.	.|.	24|26	.|.	.|.	.|.	.|.	.|.	.|.	.|.	.|.	22|20	.|.	.|.	.|.	.|.	.|.	.|.	.|.	.|.	.|.	.|.	.|.	.|.	.|.	.|.	.|.	.|.	.|.	.|.	.|.	.|.	.|.	.|.	.|.	.|.	.|.	.|.	24|24	.|.	.|.	.|.	.|.
chr10:9116225-9116251	.|.	.|.	.|.	.|.	28|28	.|.	.|.	.|.	26|28	.|.	.|.	.|.	26|28	.|.	.|.	.|.	.|.	.|.	.|.	24|28	26|26	.|.	.|.	26|28	.|.	.|.	.|.	.|.	26|26	.|.	.|.	.|.	28|30	.|.	.|.	.|.	.|.	.|.	26|26	.|.	.|.	26|28	26|28	.|.	.|.	28|28	26|26	.|.	.|.
chr10:91488662-91488704	.|.	.|.	.|.	.|.	.|.	42|44	.|.	.|.	.|.	.|.	.|.	.|.	.|.	.|.	.|.	.|.	.|.	.|.	.|.	.|.	46|48	.|.	.|.	.|.	.|.	44|48	.|.	.|.	.|.	.|.	42|42	.|.	.|.	.|.	.|.	46|48	50|52	.|.	.|.	.|.	.|.	.|.	.|.	46|48	.|.	.|.	.|.	.|.	.|.
chr10:91813248-91813286	.|.	.|.	.|.	.|.	40|42	.|.	.|.	40|40	.|.	.|.	.|.	.|.	.|.	.|.	.|.	.|.	.|.	.|.	.|.	40|40	.|.	.|.	.|.	.|.	38|40	.|.	.|.	.|.	.|.	.|.	38|40	.|.	.|.	40|42	.|.	38|40	.|.	.|.	.|.	40|42	40|42	.|.	.|.	40|42	.|.	40|42	40|42	.|.	.|.
chr10:92451644-92451680	.|.	.|.	.|.	24|26	.|.	.|.	.|.	.|.	.|.	.|.	.|.	.|.	.|.	.|.	.|.	.|.	.|.	.|.	.|.	.|.	.|.	.|.	.|.	.|.	.|.	.|.	.|.	.|.	.|.	.|.	.|.	.|.	.|.	.|.	.|.	.|.	24|26	.|.	.|.	.|.	.|.	.|.	.|.	.|.	.|.	.|.	.|.	.|.	.|.
chr10:92761560-92761588	.|.	.|.	.|.	.|.	.|.	.|.	.|.	.|.	28|26	.|.	.|.	.|.	.|.	.|.	.|.	.|.	.|.	.|.	.|.	.|.	.|.	.|.	.|.	.|.	.|.	.|.	.|.	.|.	.|.	.|.	28|28	.|.	.|.	.|.	.|.	.|.	.|.	.|.	.|.	.|.	.|.	.|.	.|.	.|.	.|.	.|.	.|.	28|30	.|.
chr10:93172425-93172451	.|.	.|.	.|.	.|.	.|.	.|.	.|.	.|.	.|.	.|.	.|.	.|.	.|.	.|.	.|.	.|.	.|.	.|.	.|.	.|.	.|.	.|.	.|.	.|.	.|.	.|.	.|.	.|.	.|.	.|.	26|24	.|.	.|.	.|.	.|.	.|.	.|.	.|.	.|.	.|.	.|.	.|.	26|26	.|.	.|.	.|.	.|.	.|.	.|.
chr10:93386001-93386041	.|.	.|.	.|.	.|.	.|.	.|.	.|.	36|38	.|.	44|44	.|.	38|44	.|.	.|.	40|44	.|.	.|.	.|.	.|.	.|.	36|38	.|.	.|.	.|.	36|38	.|.	.|.	.|.	.|.	.|.	.|.	.|.	.|.	.|.	.|.	44|46	.|.	.|.	.|.	.|.	.|.	38|46	.|.	.|.	44|46	.|.	38|38	.|.	46|48
chr10:93481396-93481422	.|.	.|.	.|.	.|.	.|.	.|.	.|.	.|.	.|.	.|.	.|.	.|.	.|.	.|.	.|.	.|.	.|.	.|.	.|.	.|.	.|.	.|.	.|.	.|.	.|.	.|.	.|.	.|.	26|24	.|.	.|.	.|.	.|.	.|.	.|.	.|.	.|.	.|.	.|.	.|.	26|24	.|.	.|.	.|.	.|.	.|.	.|.	.|.	.|.
chr10:93702055-93702087	.|.	.|.	.|.	.|.	.|.	.|.	.|.	.|.	.|.	.|.	.|.	.|.	.|.	.|.	.|.	.|.	.|.	.|.	.|.	.|.	.|.	.|.	.|.	.|.	.|.	.|.	.|.	.|.	.|.	.|.	.|.	.|.	.|.	.|.	.|.	.|.	.|.	.|.	.|.	.|.	.|.	.|.	.|.	.|.	.|.	.|.	.|.	.|.	.|.
chr10:93854565-93854597	.|.	.|.	.|.	.|.	.|.	.|.	.|.	.|.	.|.	.|.	.|.	.|.	.|.	.|.	.|.	.|.	.|.	.|.	.|.	32|26	.|.	.|.	.|.	.|.	.|.	.|.	.|.	.|.	.|.	.|.	.|.	.|.	.|.	.|.	.|.	.|.	.|.	.|.	.|.	.|.	.|.	.|.	26|26	.|.	.|.	.|.	.|.	.|.	.|.
chr10:9420135-9420181	36|40	.|.	.|.	.|.	.|.	.|.	.|.	.|.	.|.	.|.	.|.	.|.	.|.	.|.	.|.	36|40	.|.	.|.	.|.	.|.	.|.	.|.	.|.	.|.	.|.	.|.	.|.	36|40	.|.	.|.	34|38	.|.	.|.	.|.	.|.	34|38	.|.	.|.	.|.	.|.	.|.	.|.	.|.	.|.	.|.	.|.	.|.	.|.	.|.
chr10:9480217-9480255	.|.	.|.	.|.	.|.	.|.	.|.	.|.	.|.	.|.	.|.	.|.	.|.	.|.	.|.	.|.	.|.	.|.	.|.	.|.	.|.	.|.	.|.	28|30	.|.	.|.	.|.	.|.	.|.	24|26	.|.	.|.	.|.	.|.	.|.	.|.	.|.	.|.	.|.	.|.	.|.	.|.	.|.	28|30	.|.	.|.	.|.	.|.	26|26	.|.
chr10:95099124-95099150	.|.	38|40	.|.	.|.	.|.	.|.	.|.	.|.	.|.	.|.	.|.	.|.	.|.	.|.	.|.	.|.	24|24	.|.	.|.	.|.	.|.	.|.	38|40	.|.	.|.	38|40	38|40	.|.	.|.	.|.	24|24	.|.	.|.	.|.	.|.	22|40	.|.	.|.	40|42	24|38	.|.	.|.	.|.	.|.	.|.	.|.	.|.	38|40	.|.
chr10:95201754-95201798	.|.	.|.	.|.	.|.	.|.	32|76	.|.	30|30	.|.	.|.	.|.	.|.	.|.	.|.	.|.	.|.	.|.	.|.	.|.	.|.	.|.	.|.	.|.	.|.	.|.	.|.	30|32	.|.	.|.	.|.	.|.	.|.	.|.	32|32	.|.	.|.	.|.	.|.	.|.	32|76	70|76	.|.	.|.	.|.	32|32	.|.	.|.	.|.	.|.
chr10:95596262-95596306	.|.	.|.	.|.	.|.	.|.	.|.	.|.	.|.	.|.	.|.	44|44	.|.	.|.	.|.	.|.	.|.	.|.	.|.	.|.	.|.	.|.	.|.	44|44	.|.	.|.	.|.	.|.	44|40	.|.	.|.	.|.	.|.	.|.	.|.	.|.	.|.	.|.	.|.	.|.	.|.	.|.	.|.	.|.	.|.	.|.	.|.	.|.	.|.	.|.
chr10:95653268-95653303	.|.	.|.	.|.	.|.	.|.	.|.	.|.	.|.	.|.	.|.	.|.	.|.	.|.	.|.	.|.	.|.	.|.	.|.	.|.	.|.	.|.	35|35	.|.	.|.	.|.	.|.	.|.	.|.	.|.	.|.	.|.	.|.	.|.	.|.	.|.	.|.	.|.	.|.	.|.	.|.	35|35	.|.	.|.	35|35	.|.	.|.	.|.	.|.	.|.
chr10:9586497-9586533	24|24	.|.	.|.	.|.	.|.	.|.	.|.	.|.	.|.	.|.	.|.	.|.	.|.	44|46	.|.	.|.	.|.	.|.	.|.	.|.	.|.	.|.	.|.	.|.	.|.	.|.	.|.	.|.	.|.	.|.	.|.	.|.	.|.	.|.	.|.	42|44	24|24	.|.	.|.	.|.	.|.	.|.	.|.	.|.	.|.	.|.	.|.	.|.	.|.
chr10:95982088-95982120	.|.	.|.	.|.	.|.	.|.	.|.	.|.	.|.	.|.	.|.	.|.	.|.	.|.	.|.	.|.	.|.	.|.	.|.	.|.	.|.	32|32	.|.	.|.	.|.	.|.	.|.	.|.	.|.	.|.	.|.	.|.	.|.	.|.	.|.	.|.	.|.	.|.	.|.	.|.	.|.	.|.	.|.	.|.	.|.	.|.	.|.	.|.	.|.	.|.
chr10:96102310-96102342	.|.	.|.	24|24	.|.	.|.	.|.	.|.	.|.	.|.	.|.	.|.	24|26	.|.	.|.	24|24	.|.	.|.	.|.	.|.	22|22	.|.	22|24	24|26	.|.	24|26	24|26	.|.	24|26	.|.	.|.	.|.	.|.	26|26	24|24	.|.	.|.	22|22	.|.	22|24	22|24	24|24	24|24	.|.	.|.	.|.	22|24	.|.	.|.	.|.
chr10:96333210-96333240	.|.	30|30	.|.	.|.	.|.	.|.	.|.	.|.	30|30	.|.	.|.	.|.	.|.	.|.	30|30	.|.	.|.	.|.	.|.	.|.	.|.	.|.	.|.	30|30	.|.	30|30	30|30	30|30	.|.	.|.	30|30	30|30	30|30	30|30	.|.	30|30	.|.	.|.	30|30	.|.	30|30	.|.	.|.	.|.	.|.	.|.	.|.	.|.	30|30
chr10:97124930-97124974	.|.	.|.	.|.	.|.	42|46	.|.	44|44	.|.	.|.	.|.	.|.	.|.	.|.	.|.	42|46	.|.	.|.	.|.	.|.	44|44	.|.	44|46	.|.	.|.	44|46	.|.	44|38	42|46	44|44	.|.	.|.	.|.	.|.	.|.	.|.	44|44	42|46	.|.	44|48	.|.	44|48	46|48	.|.	.|.	.|.	44|48	.|.	.|.	.|.
chr10:97397724-97397766	.|.	.|.	.|.	.|.	.|.	.|.	24|24	.|.	.|.	.|.	.|.	.|.	.|.	.|.	.|.	36|36	.|.	.|.	.|.	.|.	.|.	.|.	.|.	.|.	.|.	.|.	36|36	24|24	.|.	.|.	.|.	24|24	.|.	24|36	.|.	36|36	36|36	.|.	.|.	36|36	36|36	.|.	.|.	36|36	24|24	36|36	24|24	.|.	.|.
chr10:97434579-97434611	.|.	.|.	.|.	.|.	.|.	.|.	.|.	.|.	.|.	.|.	.|.	.|.	.|.	.|.	.|.	.|.	.|.	.|.	.|.	.|.	.|.	.|.	.|.	.|.	.|.	.|.	.|.	.|.	.|.	.|.	.|.	.|.	.|.	.|.	.|.	.|.	.|.	.|.	.|.	.|.	.|.	.|.	.|.	.|.	.|.	32|32	.|.	.|.	.|.
chr10:97725542-97725578	.|.	.|.	.|.	.|.	.|.	.|.	.|.	.|.	.|.	.|.	.|.	.|.	.|.	.|.	.|.	.|.	.|.	.|.	.|.	.|.	34|34	.|.	.|.	.|.	36|32	.|.	.|.	.|.	.|.	.|.	.|.	.|.	.|.	36|40	.|.	.|.	.|.	.|.	.|.	.|.	.|.	.|.	.|.	.|.	32|32	.|.	.|.	.|.	.|.
chr10:9885765-9885809	.|.	.|.	.|.	.|.	.|.	.|.	.|.	.|.	.|.	.|.	.|.	34|36	.|.	.|.	.|.	.|.	.|.	.|.	.|.	.|.	.|.	.|.	.|.	36|36	.|.	34|36	.|.	34|36	.|.	.|.	34|36	.|.	30|30	.|.	.|.	.|.	.|.	.|.	.|.	.|.	.|.	.|.	.|.	.|.	.|.	.|.	.|.	.|.	.|.
chr10:98938547-98938571	.|.	.|.	.|.	.|.	.|.	.|.	.|.	.|.	16|16	.|.	.|.	.|.	.|.	.|.	.|.	.|.	.|.	.|.	.|.	.|.	.|.	16|16	.|.	16|16	.|.	.|.	.|.	.|.	16|16	.|.	.|.	.|.	.|.	.|.	.|.	.|.	.|.	.|.	16|16	.|.	.|.	.|.	.|.	.|.	.|.	.|.	.|.	.|.	.|.
chr10:99485448-99485492	.|.	.|.	.|.	.|.	.|.	.|.	.|.	.|.	.|.	.|.	.|.	.|.	.|.	.|.	.|.	.|.	.|.	.|.	.|.	36|40	36|38	.|.	36|40	.|.	.|.	.|.	.|.	36|40	.|.	.|.	.|.	.|.	.|.	.|.	38|38	36|40	.|.	.|.	.|.	36|38	.|.	.|.	.|.	.|.	.|.	.|.	.|.	38|40	.|.
chr11:100531316-100531344	.|.	.|.	.|.	.|.	.|.	.|.	.|.	.|.	.|.	.|.	.|.	.|.	.|.	.|.	.|.	.|.	.|.	.|.	.|.	.|.	.|.	.|.	26|26	.|.	.|.	.|.	.|.	.|.	.|.	.|.	.|.	.|.	.|.	.|.	.|.	.|.	.|.	.|.	.|.	.|.	.|.	.|.	.|.	.|.	.|.	.|.	.|.	.|.	.|.
chr11:100728817-100728855	.|.	.|.	44|46	.|.	46|48	.|.	.|.	.|.	.|.	.|.	.|.	.|.	.|.	.|.	.|.	.|.	.|.	30|30	.|.	.|.	.|.	.|.	.|.	.|.	42|46	.|.	.|.	.|.	.|.	.|.	.|.	.|.	.|.	.|.	.|.	.|.	.|.	.|.	.|.	.|.	.|.	.|.	.|.	.|.	.|.	.|.	.|.	.|.	.|.
chr11:10077071-10077119	.|.	.|.	.|.	.|.	.|.	.|.	.|.	.|.	40|42	.|.	.|.	40|42	.|.	.|.	.|.	.|.	.|.	.|.	.|.	.|.	.|.	.|.	.|.	.|.	.|.	.|.	.|.	.|.	.|.	.|.	.|.	.|.	.|.	.|.	.|.	.|.	.|.	.|.	.|.	.|.	.|.	38|40	.|.	.|.	30|30	.|.	30|42	.|.	.|.
chr11:101787759-101787807	.|.	.|.	.|.	.|.	.|.	.|.	.|.	.|.	.|.	.|.	.|.	.|.	.|.	.|.	.|.	.|.	.|.	.|.	.|.	.|.	.|.	.|.	.|.	.|.	.|.	.|.	.|.	.|.	.|.	.|.	.|.	.|.	.|.	.|.	36|36	.|.	.|.	.|.	.|.	.|.	.|.	.|.	.|.	.|.	.|.	.|.	34|36	.|.	.|.
chr11:102152148-102152172	.|.	.|.	.|.	.|.	.|.	.|.	.|.	.|.	.|.	.|.	.|.	.|.	.|.	.|.	.|.	.|.	.|.	.|.	.|.	.|.	.|.	.|.	24|24	.|.	.|.	.|.	.|.	.|.	.|.	.|.	.|.	.|.	.|.	.|.	24|24	.|.	.|.	24|24	.|.	.|.	.|.	.|.	.|.	.|.	.|.	.|.	.|.	.|.	.|.
chr11:102236474-102236502	.|.	.|.	.|.	.|.	30|30	.|.	.|.	.|.	.|.	.|.	.|.	28|30	.|.	.|.	30|30	.|.	30|30	.|.	.|.	30|30	30|30	.|.	.|.	30|30	.|.	.|.	.|.	30|30	.|.	.|.	30|30	.|.	30|30	30|30	.|.	.|.	.|.	30|30	30|32	30|30	.|.	.|.	30|30	.|.	30|30	.|.	30|30	30|30	30|30
chr11:102831653-102831679	.|.	.|.	.|.	.|.	.|.	.|.	34|36	34|36	.|.	.|.	.|.	34|36	.|.	.|.	.|.	.|.	34|36	.|.	34|36	36|38	34|36	36|36	34|36	34|36	34|36	.|.	.|.	.|.	34|36	.|.	34|36	.|.	32|36	36|36	.|.	32|34	36|36	.|.	34|36	34|36	34|36	.|.	34|36	32|36	34|36	34|36	.|.	32|36	34|34
chr11:103110371-103110407	32|32	24|24	32|32	.|.	.|.	.|.	.|.	32|32	.|.	.|.	.|.	.|.	.|.	.|.	.|.	24|24	.|.	.|.	30|32	.|.	.|.	.|.	.|.	.|.	.|.	.|.	32|32	24|24	.|.	.|.	.|.	.|.	32|32	24|24	24|24	.|.	32|32	.|.	.|.	.|.	.|.	.|.	.|.	.|.	.|.	.|.	.|.	24|32	.|.
chr11:103316765-103316795	.|.	.|.	24|24	.|.	30|30	.|.	.|.	.|.	.|.	.|.	.|.	.|.	.|.	.|.	30|30	.|.	.|.	.|.	.|.	.|.	.|.	.|.	.|.	.|.	.|.	.|.	.|.	.|.	.|.	.|.	24|24	.|.	.|.	.|.	.|.	.|.	.|.	30|30	24|24	24|27	.|.	.|.	.|.	.|.	.|.	.|.	.|.	.|.	.|.
chr11:103458262-103458302	.|.	.|.	.|.	.|.	.|.	.|.	.|.	.|.	.|.	.|.	.|.	.|.	.|.	.|.	.|.	.|.	.|.	.|.	.|.	.|.	.|.	.|.	.|.	.|.	.|.	.|.	.|.	.|.	.|.	40|38	.|.	.|.	.|.	.|.	.|.	.|.	.|.	.|.	.|.	.|.	.|.	.|.	.|.	.|.	.|.	.|.	.|.	.|.	.|.
chr11:104032678-104032708	26|28	.|.	.|.	28|24	.|.	.|.	.|.	.|.	.|.	.|.	.|.	.|.	.|.	.|.	.|.	.|.	.|.	.|.	.|.	28|32	.|.	.|.	.|.	.|.	.|.	.|.	.|.	.|.	.|.	.|.	.|.	.|.	30|24	.|.	.|.	.|.	28|32	.|.	.|.	28|24	.|.	.|.	.|.	.|.	30|32	.|.	.|.	.|.	.|.
chr11:104129839-104129875	.|.	.|.	.|.	.|.	.|.	.|.	.|.	.|.	.|.	.|.	.|.	.|.	.|.	.|.	.|.	.|.	.|.	.|.	.|.	36|36	.|.	26|28	.|.	34|36	.|.	26|26	.|.	26|26	36|36	.|.	.|.	.|.	32|38	26|26	.|.	.|.	.|.	.|.	22|26	.|.	.|.	.|.	.|.	.|.	.|.	34|38	.|.	.|.	.|.
chr11:104457152-104457184	.|.	.|.	.|.	.|.	.|.	.|.	.|.	.|.	.|.	.|.	.|.	.|.	44|46	.|.	.|.	.|.	.|.	.|.	.|.	.|.	.|.	.|.	.|.	.|.	.|.	.|.	.|.	.|.	.|.	.|.	.|.	.|.	44|42	.|.	.|.	.|.	.|.	.|.	.|.	.|.	42|46	.|.	.|.	.|.	.|.	.|.	46|46	.|.	.|.
chr11:104524459-104524489	.|.	.|.	.|.	.|.	26|28	.|.	.|.	.|.	.|.	.|.	.|.	.|.	.|.	.|.	.|.	.|.	.|.	.|.	.|.	26|28	.|.	.|.	.|.	.|.	.|.	.|.	22|24	.|.	22|24	.|.	.|.	.|.	.|.	.|.	.|.	.|.	.|.	.|.	.|.	.|.	.|.	.|.	.|.	.|.	.|.	.|.	24|26	.|.	.|.
chr11:104744390-104744418	.|.	26|26	.|.	.|.	24|24	24|24	24|24	24|24	.|.	24|26	.|.	24|24	.|.	26|26	.|.	26|26	.|.	.|.	.|.	.|.	.|.	24|24	24|26	24|26	.|.	24|26	.|.	24|24	26|26	.|.	.|.	26|26	24|24	.|.	.|.	24|24	26|26	24|24	26|26	24|26	24|24	24|24	26|26	.|.	24|26	24|24	.|.	24|26	24|24
chr11:105294301-105294337	.|.	.|.	.|.	.|.	.|.	.|.	.|.	.|.	.|.	.|.	.|.	.|.	32|34	.|.	.|.	.|.	.|.	.|.	.|.	.|.	.|.	.|.	.|.	.|.	.|.	.|.	.|.	.|.	.|.	.|.	.|.	.|.	.|.	.|.	.|.	.|.	.|.	.|.	.|.	.|.	.|.	.|.	.|.	.|.	.|.	.|.	.|.	.|.	.|.
chr11:106277599-106277645	.|.	.|.	.|.	.|.	.|.	.|.	.|.	.|.	.|.	.|.	.|.	.|.	.|.	.|.	.|.	.|.	.|.	.|.	.|.	.|.	.|.	.|.	.|.	.|.	.|.	.|.	.|.	.|.	38|40	.|.	.|.	.|.	.|.	.|.	.|.	.|.	.|.	.|.	.|.	.|.	.|.	.|.	.|.	.|.	.|.	.|.	.|.	38|40	.|.
chr11:10656300-10656332	.|.	.|.	.|.	.|.	.|.	.|.	.|.	.|.	.|.	.|.	.|.	.|.	.|.	.|.	.|.	.|.	.|.	.|.	26|26	.|.	.|.	.|.	.|.	.|.	.|.	.|.	.|.	24|26	.|.	.|.	.|.	.|.	.|.	.|.	.|.	.|.	.|.	.|.	.|.	.|.	.|.	.|.	.|.	.|.	.|.	.|.	.|.	.|.	.|.
chr11:10686673-10686697	.|.	24|24	.|.	.|.	.|.	.|.	.|.	.|.	24|24	.|.	.|.	24|24	.|.	.|.	.|.	.|.	.|.	.|.	.|.	.|.	.|.	24|24	.|.	.|.	.|.	24|24	.|.	.|.	24|24	.|.	24|24	.|.	24|24	24|24	.|.	.|.	24|24	.|.	24|24	24|24	24|24	.|.	24|24	24|24	24|24	24|24	24|24	24|24	.|.
chr11:107184791-107184815	.|.	.|.	.|.	.|.	.|.	.|.	.|.	.|.	.|.	.|.	.|.	.|.	.|.	.|.	.|.	.|.	.|.	.|.	.|.	.|.	.|.	.|.	.|.	.|.	.|.	.|.	.|.	.|.	.|.	.|.	.|.	.|.	.|.	28|28	.|.	.|.	24|28	.|.	.|.	.|.	24|24	.|.	.|.	.|.	.|.	24|24	.|.	.|.	.|.
chr11:107231004-107231028	.|.	.|.	.|.	.|.	.|.	.|.	.|.	.|.	.|.	.|.	.|.	.|.	.|.	.|.	.|.	24|24	.|.	23|23	.|.	.|.	.|.	.|.	.|.	.|.	.|.	.|.	.|.	23|23	.|.	.|.	.|.	.|.	.|.	.|.	.|.	.|.	.|.	.|.	.|.	.|.	.|.	24|24	.|.	.|.	.|.	.|.	.|.	.|.	.|.
chr11:107295905-107295941	36|38	.|.	.|.	.|.	.|.	.|.	.|.	.|.	.|.	28|30	.|.	.|.	.|.	.|.	.|.	.|.	.|.	.|.	.|.	.|.	30|32	.|.	.|.	.|.	.|.	.|.	.|.	.|.	36|38	.|.	.|.	.|.	.|.	.|.	.|.	.|.	.|.	.|.	.|.	.|.	.|.	.|.	.|.	.|.	.|.	.|.	.|.	36|38	.|.
chr11:109080699-109080729	.|.	.|.	.|.	.|.	.|.	.|.	.|.	.|.	.|.	.|.	.|.	.|.	.|.	.|.	.|.	.|.	.|.	.|.	.|.	.|.	.|.	.|.	.|.	.|.	.|.	.|.	.|.	.|.	.|.	.|.	.|.	.|.	.|.	.|.	.|.	.|.	.|.	.|.	.|.	.|.	.|.	.|.	.|.	.|.	.|.	.|.	.|.	.|.	.|.
chr11:109326582-109326624	.|.	.|.	.|.	.|.	.|.	.|.	.|.	.|.	.|.	.|.	.|.	.|.	.|.	.|.	.|.	.|.	.|.	.|.	.|.	.|.	.|.	.|.	.|.	.|.	.|.	32|32	.|.	.|.	.|.	.|.	.|.	.|.	.|.	.|.	.|.	.|.	.|.	.|.	38|38	.|.	.|.	.|.	.|.	.|.	.|.	.|.	.|.	.|.	.|.
chr11:109854356-109854388	.|.	.|.	.|.	.|.	36|36	.|.	.|.	.|.	.|.	.|.	.|.	.|.	.|.	.|.	.|.	.|.	.|.	36|36	.|.	.|.	.|.	.|.	.|.	.|.	.|.	.|.	.|.	.|.	.|.	.|.	36|36	.|.	36|36	.|.	.|.	.|.	.|.	.|.	.|.	.|.	.|.	36|36	.|.	.|.	.|.	.|.	.|.	.|.	.|.
chr11:109938907-109938943	.|.	.|.	.|.	.|.	.|.	.|.	.|.	.|.	.|.	.|.	.|.	.|.	.|.	.|.	.|.	.|.	.|.	.|.	.|.	.|.	.|.	.|.	.|.	.|.	.|.	.|.	.|.	.|.	.|.	.|.	.|.	.|.	.|.	.|.	40|40	.|.	.|.	.|.	40|40	.|.	40|40	.|.	.|.	.|.	40|40	40|40	.|.	.|.	.|.
chr11:110301825-110301861	.|.	33|33	.|.	.|.	.|.	36|36	.|.	33|33	.|.	.|.	.|.	36|36	33|33	.|.	.|.	36|36	36|36	.|.	.|.	36|36	36|36	.|.	36|36	.|.	33|33	.|.	36|36	.|.	.|.	.|.	.|.	.|.	.|.	.|.	.|.	33|33	.|.	.|.	33|33	33|33	36|36	.|.	36|36	36|33	.|.	.|.	33|33	.|.	33|33
chr11:110801013-110801043	.|.	.|.	.|.	.|.	.|.	.|.	30|28	.|.	.|.	30|28	.|.	.|.	.|.	.|.	30|28	30|28	.|.	.|.	.|.	30|28	.|.	.|.	.|.	.|.	30|28	30|32	30|28	.|.	.|.	.|.	30|28	.|.	30|28	.|.	.|.	30|28	.|.	.|.	30|28	30|28	30|28	.|.	.|.	28|28	.|.	30|28	30|28	.|.	.|.
chr11:110846602-110846658	.|.	.|.	.|.	.|.	.|.	.|.	.|.	.|.	.|.	.|.	.|.	.|.	.|.	.|.	.|.	.|.	.|.	.|.	.|.	52|52	.|.	.|.	.|.	.|.	.|.	.|.	.|.	.|.	.|.	.|.	.|.	.|.	.|.	.|.	.|.	.|.	.|.	.|.	.|.	.|.	.|.	.|.	.|.	.|.	.|.	.|.	.|.	.|.	.|.
chr11:110947636-110947668	.|.	.|.	.|.	.|.	.|.	.|.	.|.	.|.	.|.	.|.	.|.	.|.	.|.	.|.	.|.	.|.	.|.	.|.	.|.	.|.	.|.	32|36	.|.	.|.	.|.	.|.	.|.	.|.	.|.	.|.	.|.	.|.	.|.	.|.	.|.	.|.	.|.	.|.	.|.	.|.	.|.	.|.	.|.	.|.	.|.	.|.	.|.	.|.	.|.
chr11:110982495-110982543	.|.	.|.	.|.	.|.	.|.	.|.	.|.	.|.	.|.	.|.	.|.	.|.	.|.	.|.	.|.	.|.	.|.	.|.	.|.	.|.	.|.	.|.	.|.	.|.	48|42	.|.	38|38	.|.	.|.	.|.	.|.	.|.	.|.	.|.	.|.	40|42	.|.	.|.	.|.	.|.	36|44	.|.	.|.	.|.	.|.	.|.	.|.	.|.	.|.
chr11:111346860-111346884	.|.	26|26	.|.	.|.	26|26	26|26	.|.	.|.	.|.	26|26	26|26	26|26	.|.	.|.	.|.	26|26	.|.	.|.	28|28	26|26	28|28	.|.	28|28	28|28	26|26	26|28	26|26	26|26	.|.	.|.	.|.	.|.	26|26	.|.	28|28	26|26	26|26	.|.	28|28	.|.	.|.	28|28	26|28	.|.	28|28	26|28	28|28	.|.	.|.
chr11:111424440-111424478	44|48	.|.	32|44	.|.	.|.	.|.	.|.	.|.	.|.	.|.	.|.	.|.	.|.	.|.	.|.	.|.	.|.	44|46	.|.	44|46	.|.	44|46	.|.	42|44	.|.	.|.	.|.	.|.	.|.	.|.	.|.	.|.	.|.	.|.	.|.	.|.	.|.	.|.	46|48	.|.	.|.	.|.	.|.	.|.	.|.	.|.	.|.	.|.	.|.
chr11:111990842-111990870	.|.	.|.	.|.	.|.	.|.	.|.	.|.	.|.	.|.	.|.	.|.	.|.	.|.	.|.	.|.	.|.	.|.	.|.	.|.	.|.	.|.	.|.	.|.	.|.	.|.	.|.	.|.	.|.	.|.	.|.	.|.	.|.	.|.	.|.	.|.	.|.	.|.	.|.	.|.	.|.	.|.	.|.	.|.	.|.	.|.	.|.	.|.	.|.	.|.
chr11:112183533-112183565	.|.	.|.	.|.	.|.	.|.	.|.	.|.	.|.	.|.	.|.	.|.	.|.	.|.	.|.	.|.	.|.	.|.	.|.	.|.	.|.	.|.	34|36	.|.	.|.	.|.	34|36	.|.	.|.	.|.	.|.	28|28	.|.	.|.	.|.	.|.	.|.	.|.	.|.	.|.	.|.	.|.	.|.	26|28	.|.	.|.	.|.	.|.	.|.	.|.
chr11:112789315-112789351	.|.	.|.	.|.	.|.	.|.	.|.	.|.	36|36	.|.	.|.	.|.	.|.	.|.	.|.	.|.	.|.	.|.	.|.	.|.	.|.	.|.	.|.	.|.	36|36	.|.	.|.	.|.	.|.	.|.	.|.	.|.	.|.	.|.	.|.	.|.	.|.	.|.	.|.	.|.	.|.	.|.	.|.	.|.	.|.	.|.	.|.	.|.	.|.	36|36
chr11:112827863-112827887	.|.	.|.	.|.	.|.	.|.	.|.	.|.	.|.	.|.	.|.	.|.	.|.	.|.	.|.	.|.	.|.	.|.	.|.	.|.	.|.	24|24	.|.	.|.	.|.	.|.	.|.	.|.	.|.	.|.	.|.	.|.	.|.	.|.	.|.	.|.	24|24	.|.	.|.	.|.	.|.	.|.	.|.	.|.	.|.	.|.	.|.	.|.	.|.	.|.
chr11:113027858-113027886	.|.	.|.	.|.	.|.	.|.	.|.	.|.	.|.	.|.	.|.	.|.	.|.	.|.	.|.	.|.	.|.	.|.	.|.	.|.	.|.	.|.	26|26	.|.	.|.	.|.	.|.	.|.	.|.	.|.	.|.	.|.	.|.	.|.	.|.	.|.	.|.	.|.	.|.	.|.	.|.	.|.	.|.	.|.	.|.	.|.	.|.	.|.	.|.	.|.
chr11:113824651-113824676	25|25	.|.	25|25	.|.	25|25	25|25	.|.	.|.	25|25	.|.	.|.	.|.	.|.	.|.	.|.	.|.	.|.	.|.	.|.	25|25	.|.	.|.	.|.	25|25	.|.	.|.	.|.	25|25	25|25	.|.	25|25	.|.	.|.	.|.	.|.	.|.	25|25	.|.	.|.	25|25	25|25	.|.	25|25	.|.	25|25	.|.	25|25	.|.	.|.
chr11:113981878-113981902	24|24	24|24	.|.	.|.	.|.	30|32	24|24	.|.	.|.	.|.	.|.	28|32	.|.	.|.	.|.	32|32	.|.	.|.	.|.	24|24	24|24	.|.	.|.	.|.	.|.	.|.	.|.	.|.	24|32	.|.	24|32	.|.	28|30	.|.	.|.	.|.	.|.	.|.	.|.	.|.	24|30	28|30	.|.	.|.	.|.	.|.	.|.	.|.	.|.
chr11:114341304-114341346	.|.	.|.	.|.	.|.	.|.	.|.	.|.	28|28	36|38	.|.	28|28	28|36	.|.	.|.	.|.	.|.	28|28	.|.	.|.	.|.	.|.	28|38	.|.	.|.	28|28	28|28	28|28	.|.	28|28	.|.	28|36	.|.	28|40	28|28	.|.	28|36	36|40	36|40	.|.	28|40	.|.	28|40	.|.	28|28	28|38	26|28	28|28	28|28	.|.
chr11:114694869-114694897	.|.	24|24	.|.	.|.	.|.	24|24	24|24	24|24	.|.	.|.	.|.	.|.	.|.	.|.	.|.	.|.	.|.	.|.	.|.	.|.	.|.	.|.	.|.	.|.	.|.	.|.	.|.	.|.	.|.	.|.	24|24	24|24	.|.	.|.	.|.	24|24	.|.	.|.	.|.	.|.	24|24	.|.	24|24	.|.	24|24	24|24	24|24	.|.	.|.
chr11:11518874-11518918	.|.	.|.	.|.	.|.	.|.	.|.	.|.	.|.	.|.	.|.	.|.	.|.	.|.	.|.	.|.	.|.	.|.	.|.	.|.	.|.	.|.	.|.	48|48	46|48	.|.	46|48	.|.	.|.	46|50	.|.	48|50	.|.	.|.	40|42	.|.	46|50	.|.	.|.	.|.	.|.	44|42	.|.	.|.	44|42	44|48	.|.	.|.	.|.	.|.
chr11:116510720-116510746	.|.	.|.	.|.	.|.	.|.	.|.	.|.	.|.	.|.	.|.	.|.	.|.	.|.	.|.	.|.	.|.	.|.	.|.	.|.	22|22	.|.	28|30	28|30	.|.	28|30	.|.	.|.	.|.	.|.	22|22	.|.	.|.	.|.	.|.	.|.	28|30	.|.	28|30	.|.	.|.	.|.	.|.	.|.	.|.	22|22	.|.	.|.	.|.	.|.
chr11:116587114-116587152	.|.	.|.	.|.	.|.	.|.	.|.	.|.	.|.	.|.	.|.	.|.	54|56	.|.	34|34	.|.	.|.	.|.	.|.	.|.	.|.	.|.	.|.	.|.	.|.	.|.	.|.	.|.	.|.	.|.	.|.	.|.	.|.	.|.	.|.	.|.	.|.	.|.	.|.	.|.	.|.	.|.	.|.	.|.	.|.	.|.	.|.	.|.	.|.	.|.
chr11:11698833-11698861	.|.	28|28	.|.	.|.	.|.	.|.	.|.	.|.	.|.	.|.	.|.	28|28	.|.	.|.	.|.	.|.	.|.	.|.	.|.	28|24	.|.	28|28	.|.	.|.	.|.	.|.	.|.	28|28	.|.	.|.	.|.	.|.	28|28	.|.	28|28	28|28	.|.	.|.	28|28	28|28	28|28	.|.	.|.	28|28	28|28	.|.	.|.	28|28	.|.
chr11:117628288-117628334	.|.	.|.	.|.	.|.	.|.	.|.	.|.	.|.	.|.	.|.	.|.	.|.	.|.	.|.	.|.	.|.	.|.	.|.	.|.	.|.	.|.	.|.	.|.	.|.	.|.	.|.	.|.	.|.	.|.	.|.	.|.	.|.	.|.	.|.	.|.	38|38	.|.	.|.	.|.	.|.	.|.	.|.	.|.	.|.	.|.	.|.	.|.	.|.	.|.
chr11:117916045-117916075	.|.	.|.	.|.	.|.	40|42	.|.	.|.	.|.	.|.	.|.	.|.	.|.	.|.	.|.	52|56	.|.	.|.	.|.	.|.	.|.	.|.	40|42	.|.	.|.	50|54	40|42	50|56	40|42	.|.	.|.	.|.	.|.	.|.	.|.	.|.	42|42	.|.	54|58	.|.	.|.	42|52	38|42	52|56	.|.	.|.	40|54	54|56	.|.	.|.
chr11:118121793-118121833	.|.	.|.	.|.	.|.	.|.	.|.	36|36	.|.	.|.	.|.	.|.	.|.	.|.	.|.	.|.	.|.	.|.	.|.	.|.	.|.	.|.	.|.	.|.	.|.	.|.	.|.	34|36	.|.	.|.	.|.	.|.	.|.	.|.	.|.	.|.	.|.	.|.	.|.	.|.	.|.	.|.	.|.	.|.	.|.	.|.	.|.	.|.	.|.	.|.
chr11:118616362-118616406	.|.	.|.	.|.	.|.	.|.	.|.	.|.	.|.	.|.	.|.	.|.	.|.	.|.	.|.	.|.	.|.	.|.	.|.	.|.	.|.	.|.	.|.	.|.	.|.	.|.	.|.	.|.	.|.	.|.	.|.	.|.	.|.	.|.	.|.	.|.	.|.	.|.	.|.	.|.	.|.	.|.	.|.	.|.	.|.	.|.	.|.	.|.	.|.	.|.
chr11:119073281-119073305	24|24	.|.	.|.	.|.	24|24	24|24	24|24	.|.	24|24	.|.	24|24	.|.	.|.	.|.	.|.	.|.	.|.	.|.	.|.	.|.	.|.	.|.	.|.	.|.	.|.	.|.	24|24	.|.	24|24	.|.	24|24	24|24	.|.	.|.	24|24	.|.	.|.	.|.	24|24	.|.	.|.	.|.	.|.	.|.	24|24	24|16	.|.	.|.	.|.
chr11:120347790-120347829	.|.	.|.	.|.	.|.	.|.	.|.	.|.	.|.	.|.	.|.	.|.	.|.	.|.	.|.	.|.	.|.	.|.	.|.	.|.	.|.	.|.	.|.	.|.	.|.	.|.	.|.	.|.	.|.	.|.	.|.	.|.	.|.	.|.	.|.	36|36	.|.	.|.	.|.	.|.	.|.	.|.	.|.	.|.	.|.	.|.	.|.	.|.	.|.	.|.
chr11:12052629-12052665	34|34	.|.	.|.	.|.	.|.	.|.	.|.	.|.	32|34	.|.	.|.	.|.	.|.	.|.	.|.	34|34	.|.	.|.	.|.	.|.	.|.	.|.	.|.	.|.	.|.	.|.	.|.	.|.	.|.	.|.	.|.	36|34	.|.	.|.	.|.	.|.	.|.	32|34	.|.	.|.	32|34	.|.	.|.	.|.	.|.	.|.	.|.	.|.	.|.
chr11:121905485-121905511	.|.	.|.	.|.	.|.	.|.	.|.	.|.	.|.	.|.	.|.	.|.	.|.	.|.	.|.	.|.	.|.	.|.	.|.	.|.	.|.	.|.	.|.	.|.	.|.	.|.	.|.	.|.	20|20	.|.	.|.	.|.	.|.	.|.	.|.	.|.	.|.	14|20	.|.	.|.	.|.	.|.	.|.	.|.	.|.	.|.	.|.	.|.	14|14	.|.
chr11:121921886-121921930	.|.	32|36	30|36	32|30	.|.	.|.	.|.	.|.	.|.	.|.	.|.	.|.	.|.	.|.	32|30	.|.	.|.	.|.	.|.	.|.	.|.	.|.	.|.	28|28	.|.	32|32	32|32	.|.	.|.	32|32	34|36	.|.	34|36	.|.	.|.	.|.	.|.	.|.	.|.	.|.	38|30	34|36	32|32	.|.	.|.	.|.	.|.	.|.	.|.
chr11:122128054-122128088	.|.	.|.	.|.	.|.	.|.	.|.	.|.	.|.	.|.	.|.	.|.	.|.	.|.	.|.	.|.	.|.	.|.	.|.	.|.	.|.	30|32	.|.	.|.	.|.	.|.	.|.	30|32	.|.	.|.	.|.	.|.	.|.	30|32	.|.	.|.	.|.	.|.	.|.	.|.	.|.	.|.	26|32	.|.	.|.	.|.	.|.	.|.	.|.	.|.
chr11:122297886-122297926	.|.	46|46	46|42	.|.	46|46	.|.	32|34	.|.	46|42	.|.	.|.	.|.	44|46	.|.	34|40	44|46	32|34	46|40	.|.	46|42	36|46	44|46	.|.	34|34	34|40	32|34	46|42	44|46	46|42	44|46	.|.	44|46	46|42	50|44	.|.	.|.	46|40	34|40	46|42	.|.	46|40	36|34	44|46	46|42	36|46	46|40	46|42	40|46	44|46
chr11:122373178-122373208	.|.	.|.	.|.	.|.	.|.	.|.	.|.	.|.	.|.	.|.	.|.	.|.	24|26	.|.	.|.	.|.	24|26	.|.	.|.	.|.	.|.	.|.	.|.	.|.	.|.	.|.	.|.	.|.	.|.	.|.	.|.	.|.	.|.	.|.	.|.	.|.	.|.	.|.	.|.	.|.	24|26	.|.	.|.	.|.	.|.	.|.	.|.	.|.	.|.
chr11:123253913-123253943	.|.	.|.	.|.	.|.	.|.	.|.	.|.	.|.	.|.	.|.	20|20	.|.	.|.	.|.	.|.	.|.	.|.	.|.	22|22	.|.	.|.	.|.	.|.	.|.	.|.	.|.	.|.	.|.	.|.	.|.	.|.	.|.	.|.	.|.	.|.	.|.	.|.	.|.	.|.	.|.	.|.	.|.	.|.	.|.	.|.	.|.	.|.	.|.	.|.
chr11:123275900-123275928	.|.	.|.	.|.	.|.	.|.	.|.	24|26	.|.	.|.	.|.	.|.	.|.	.|.	.|.	.|.	.|.	.|.	.|.	28|26	.|.	.|.	.|.	.|.	.|.	.|.	.|.	.|.	.|.	.|.	.|.	.|.	.|.	.|.	.|.	.|.	.|.	.|.	.|.	.|.	.|.	.|.	.|.	.|.	.|.	.|.	.|.	.|.	.|.	.|.
chr11:123735862-123735900	.|.	.|.	.|.	.|.	.|.	.|.	.|.	.|.	.|.	.|.	.|.	.|.	.|.	.|.	.|.	.|.	.|.	.|.	.|.	.|.	.|.	.|.	.|.	.|.	.|.	.|.	.|.	.|.	.|.	.|.	.|.	.|.	.|.	.|.	.|.	.|.	.|.	.|.	.|.	.|.	.|.	.|.	.|.	.|.	.|.	.|.	.|.	.|.	.|.
chr11:124187153-124187195	.|.	.|.	.|.	.|.	.|.	.|.	.|.	.|.	.|.	.|.	.|.	.|.	26|26	.|.	.|.	.|.	.|.	.|.	.|.	.|.	.|.	.|.	.|.	.|.	44|46	.|.	.|.	.|.	.|.	40|44	.|.	.|.	.|.	.|.	.|.	.|.	.|.	.|.	.|.	.|.	.|.	.|.	.|.	.|.	.|.	.|.	.|.	.|.	.|.
chr11:124296199-124296241	.|.	.|.	.|.	.|.	.|.	.|.	.|.	.|.	.|.	.|.	.|.	.|.	.|.	.|.	.|.	.|.	.|.	.|.	.|.	.|.	.|.	.|.	36|38	36|38	.|.	.|.	.|.	.|.	.|.	.|.	.|.	.|.	.|.	.|.	.|.	.|.	.|.	.|.	.|.	.|.	.|.	32|50	.|.	.|.	.|.	.|.	.|.	.|.	.|.
chr11:124422388-124422416	.|.	.|.	.|.	.|.	.|.	.|.	.|.	.|.	.|.	.|.	.|.	.|.	.|.	.|.	28|28	.|.	.|.	.|.	.|.	.|.	.|.	.|.	.|.	.|.	28|28	.|.	.|.	.|.	.|.	.|.	.|.	.|.	.|.	.|.	.|.	.|.	.|.	.|.	.|.	.|.	.|.	.|.	.|.	.|.	.|.	.|.	.|.	.|.	.|.
chr11:125065779-125065819	.|.	34|36	.|.	32|34	.|.	.|.	.|.	34|36	.|.	.|.	.|.	.|.	.|.	.|.	.|.	54|54	.|.	.|.	52|56	54|56	.|.	.|.	.|.	.|.	.|.	54|56	52|54	.|.	.|.	.|.	.|.	.|.	50|54	.|.	56|58	.|.	36|36	.|.	.|.	.|.	36|56	54|56	.|.	.|.	34|36	.|.	32|36	.|.	.|.
chr11:125341327-125341359	.|.	.|.	.|.	.|.	.|.	.|.	.|.	.|.	.|.	.|.	.|.	.|.	.|.	.|.	.|.	.|.	.|.	.|.	.|.	.|.	28|30	.|.	.|.	.|.	.|.	.|.	.|.	.|.	.|.	.|.	.|.	.|.	32|30	.|.	.|.	.|.	.|.	.|.	.|.	.|.	.|.	.|.	.|.	.|.	.|.	.|.	.|.	.|.	.|.
chr11:125527082-125527112	.|.	.|.	.|.	.|.	.|.	.|.	.|.	.|.	.|.	.|.	.|.	34|36	.|.	.|.	.|.	.|.	.|.	.|.	.|.	.|.	.|.	.|.	44|46	.|.	.|.	.|.	.|.	.|.	.|.	.|.	.|.	.|.	.|.	.|.	.|.	.|.	.|.	.|.	.|.	.|.	.|.	.|.	.|.	.|.	.|.	.|.	.|.	.|.	.|.
chr11:125863290-125863320	22|22	.|.	22|22	22|22	.|.	22|24	.|.	.|.	.|.	22|22	20|22	.|.	.|.	.|.	.|.	.|.	.|.	.|.	20|24	22|24	.|.	.|.	.|.	24|24	.|.	.|.	22|24	22|24	22|22	22|24	22|22	.|.	22|24	24|24	.|.	24|24	.|.	.|.	.|.	.|.	22|24	22|22	.|.	.|.	20|22	.|.	.|.	.|.	.|.
chr11:127121296-127121326	.|.	.|.	24|24	.|.	30|30	.|.	.|.	.|.	24|24	.|.	.|.	.|.	.|.	.|.	24|24	.|.	.|.	.|.	.|.	30|30	.|.	.|.	.|.	.|.	.|.	30|30	.|.	.|.	30|30	.|.	30|24	24|24	.|.	.|.	30|24	30|30	30|24	.|.	27|27	30|30	24|24	.|.	24|24	30|30	.|.	24|24	.|.	24|24	30|30
chr11:127173851-127173883	.|.	.|.	.|.	.|.	.|.	.|.	.|.	.|.	.|.	.|.	.|.	.|.	.|.	.|.	.|.	.|.	.|.	.|.	.|.	.|.	.|.	26|26	.|.	.|.	.|.	.|.	.|.	.|.	.|.	.|.	.|.	.|.	.|.	.|.	.|.	.|.	.|.	.|.	.|.	.|.	.|.	.|.	.|.	.|.	.|.	.|.	.|.	.|.	.|.
chr11:127274971-127274999	.|.	.|.	.|.	.|.	26|26	.|.	.|.	30|30	.|.	.|.	.|.	.|.	26|26	.|.	.|.	.|.	.|.	.|.	.|.	.|.	.|.	.|.	.|.	30|30	26|30	26|26	26|26	.|.	.|.	.|.	.|.	.|.	26|30	.|.	.|.	26|26	26|30	24|26	.|.	26|30	28|26	24|26	.|.	.|.	.|.	.|.	30|30	26|26	.|.
chr11:127299729-127299759	.|.	.|.	.|.	.|.	.|.	.|.	.|.	.|.	.|.	.|.	.|.	.|.	.|.	.|.	.|.	.|.	.|.	.|.	.|.	.|.	.|.	.|.	.|.	30|30	.|.	.|.	.|.	.|.	.|.	.|.	.|.	.|.	.|.	.|.	.|.	.|.	.|.	.|.	.|.	.|.	.|.	.|.	.|.	.|.	30|30	.|.	.|.	.|.	.|.
chr11:127459850-127459882	34|36	.|.	.|.	.|.	.|.	.|.	.|.	42|44	.|.	34|34	.|.	.|.	.|.	.|.	.|.	.|.	.|.	.|.	.|.	.|.	34|34	34|34	38|40	.|.	.|.	.|.	38|40	40|40	40|42	.|.	32|34	.|.	.|.	.|.	.|.	.|.	34|34	.|.	.|.	.|.	.|.	.|.	40|40	.|.	.|.	.|.	.|.	40|40	.|.
chr11:127542581-127542625	.|.	.|.	.|.	.|.	.|.	.|.	.|.	.|.	.|.	.|.	.|.	.|.	.|.	.|.	.|.	.|.	32|32	.|.	.|.	.|.	.|.	.|.	38|40	.|.	.|.	.|.	30|32	.|.	.|.	.|.	40|42	.|.	.|.	.|.	.|.	.|.	.|.	.|.	.|.	.|.	.|.	.|.	.|.	.|.	.|.	.|.	.|.	.|.	.|.
chr11:127572579-127572615	.|.	.|.	.|.	.|.	.|.	.|.	.|.	.|.	.|.	24|24	.|.	.|.	.|.	.|.	.|.	.|.	.|.	.|.	.|.	.|.	.|.	.|.	.|.	.|.	.|.	.|.	.|.	36|34	.|.	.|.	.|.	.|.	.|.	24|24	.|.	.|.	36|34	.|.	.|.	.|.	.|.	.|.	24|24	.|.	.|.	.|.	.|.	.|.	.|.
chr11:127864272-127864296	.|.	20|20	.|.	.|.	.|.	.|.	20|20	.|.	.|.	.|.	.|.	.|.	.|.	.|.	.|.	.|.	.|.	20|20	.|.	.|.	.|.	.|.	26|28	.|.	.|.	20|20	20|20	20|28	20|20	.|.	.|.	.|.	.|.	.|.	.|.	20|20	.|.	.|.	.|.	26|28	.|.	20|20	.|.	.|.	.|.	.|.	.|.	20|20	.|.
chr11:128060143-128060177	.|.	.|.	.|.	.|.	.|.	32|34	.|.	.|.	.|.	.|.	.|.	.|.	.|.	.|.	.|.	.|.	.|.	.|.	.|.	.|.	.|.	.|.	32|34	32|34	.|.	.|.	.|.	.|.	32|36	.|.	.|.	.|.	.|.	.|.	.|.	.|.	.|.	.|.	.|.	.|.	.|.	30|32	.|.	.|.	.|.	.|.	.|.	.|.	.|.
chr11:128089285-128089335	40|44	.|.	.|.	.|.	.|.	.|.	.|.	.|.	.|.	.|.	.|.	.|.	.|.	.|.	.|.	.|.	.|.	.|.	.|.	.|.	.|.	.|.	.|.	.|.	.|.	.|.	.|.	.|.	.|.	.|.	.|.	.|.	.|.	.|.	.|.	.|.	.|.	.|.	.|.	.|.	.|.	.|.	.|.	.|.	.|.	.|.	.|.	.|.	.|.
chr11:128358821-128358845	.|.	.|.	.|.	.|.	24|24	.|.	.|.	.|.	.|.	.|.	.|.	24|24	.|.	.|.	.|.	24|24	.|.	.|.	.|.	24|24	.|.	24|24	24|24	.|.	24|24	.|.	.|.	.|.	24|24	.|.	.|.	.|.	.|.	.|.	.|.	24|24	24|24	.|.	24|24	.|.	24|24	24|24	24|24	.|.	.|.	.|.	24|24	.|.	.|.
chr11:12969125-12969165	48|50	44|46	.|.	.|.	44|46	.|.	.|.	.|.	.|.	.|.	.|.	.|.	22|20	.|.	48|50	44|46	.|.	.|.	.|.	22|46	.|.	.|.	.|.	.|.	46|48	22|20	.|.	.|.	.|.	22|22	44|46	.|.	48|50	.|.	22|20	.|.	48|50	.|.	22|20	.|.	22|46	48|50	.|.	48|22	46|48	46|48	46|22	22|48	.|.
chr11:130385693-130385727	.|.	.|.	.|.	.|.	.|.	.|.	.|.	.|.	.|.	.|.	.|.	.|.	.|.	.|.	.|.	.|.	.|.	.|.	.|.	.|.	.|.	.|.	.|.	.|.	.|.	.|.	.|.	.|.	.|.	.|.	.|.	.|.	.|.	.|.	.|.	.|.	.|.	.|.	.|.	.|.	.|.	.|.	.|.	.|.	.|.	.|.	.|.	.|.	.|.
chr11:130451363-130451397	.|.	.|.	.|.	.|.	.|.	.|.	.|.	26|28	34|32	.|.	28|28	32|24	.|.	28|28	.|.	.|.	.|.	30|30	.|.	.|.	.|.	30|30	32|32	.|.	.|.	.|.	30|30	.|.	30|32	.|.	.|.	.|.	30|30	.|.	.|.	.|.	30|30	.|.	32|32	28|30	34|32	30|32	.|.	.|.	.|.	.|.	32|32	.|.	.|.
chr11:130613774-130613806	.|.	32|32	.|.	.|.	32|32	.|.	32|32	.|.	32|32	32|32	32|32	32|32	.|.	.|.	32|32	32|32	.|.	.|.	.|.	.|.	.|.	.|.	32|32	.|.	.|.	.|.	.|.	32|32	.|.	.|.	32|32	.|.	32|32	.|.	.|.	.|.	.|.	.|.	.|.	.|.	.|.	.|.	.|.	.|.	.|.	32|32	32|32	.|.	32|28
chr11:131059867-131059913	.|.	42|44	.|.	.|.	46|48	.|.	.|.	.|.	46|48	46|48	.|.	48|50	46|44	.|.	.|.	48|48	.|.	.|.	48|50	46|48	46|48	.|.	.|.	.|.	.|.	.|.	46|48	.|.	46|46	.|.	.|.	.|.	.|.	46|48	48|50	.|.	.|.	.|.	.|.	48|50	.|.	.|.	48|50	48|48	46|48	.|.	48|50	48|48	.|.
chr11:131195528-131195562	.|.	.|.	.|.	.|.	.|.	.|.	.|.	40|42	.|.	.|.	.|.	34|34	.|.	.|.	.|.	.|.	38|40	.|.	.|.	38|36	.|.	34|34	.|.	34|40	40|42	.|.	44|34	.|.	38|40	.|.	.|.	.|.	40|42	.|.	34|34	.|.	34|32	38|42	.|.	40|40	40|40	.|.	.|.	.|.	.|.	.|.	.|.	38|40	34|34
chr11:131219843-131219869	.|.	24|28	28|28	24|28	26|28	.|.	24|28	24|26	24|24	24|26	.|.	.|.	24|26	.|.	.|.	.|.	.|.	.|.	.|.	24|28	24|24	28|28	24|24	24|24	24|26	24|24	24|28	24|24	24|28	.|.	24|24	.|.	26|28	26|28	24|26	24|28	26|28	26|28	24|24	24|26	24|26	26|28	.|.	.|.	24|28	24|24	26|28	24|26	26|28
chr11:131459061-131459095	.|.	.|.	.|.	.|.	.|.	.|.	.|.	28|28	34|36	.|.	.|.	34|32	36|38	.|.	.|.	28|28	.|.	.|.	.|.	.|.	.|.	28|28	.|.	34|36	.|.	.|.	.|.	.|.	28|28	.|.	.|.	34|36	34|36	.|.	.|.	.|.	.|.	34|36	.|.	28|28	.|.	34|36	.|.	.|.	.|.	.|.	.|.	.|.	.|.
chr11:131566679-131566705	.|.	.|.	.|.	.|.	.|.	.|.	.|.	28|28	.|.	.|.	.|.	28|28	.|.	.|.	.|.	.|.	.|.	.|.	26|26	.|.	.|.	.|.	.|.	.|.	.|.	.|.	26|26	.|.	28|28	.|.	26|26	.|.	28|28	26|24	.|.	.|.	.|.	.|.	.|.	26|24	.|.	26|26	.|.	.|.	.|.	.|.	.|.	26|24	.|.
chr11:131719860-131719890	.|.	.|.	.|.	27|24	.|.	.|.	.|.	.|.	27|21	.|.	.|.	.|.	.|.	27|24	.|.	.|.	.|.	.|.	.|.	.|.	.|.	27|24	.|.	27|24	.|.	.|.	.|.	.|.	27|21	.|.	.|.	.|.	27|24	.|.	.|.	.|.	.|.	27|24	.|.	24|24	27|24	27|24	27|21	.|.	27|24	27|24	.|.	.|.	.|.
chr11:132500421-132500445	.|.	.|.	.|.	.|.	.|.	.|.	.|.	.|.	.|.	.|.	.|.	24|22	24|24	.|.	.|.	.|.	.|.	.|.	.|.	.|.	.|.	.|.	.|.	.|.	.|.	.|.	.|.	.|.	.|.	.|.	.|.	.|.	.|.	.|.	.|.	.|.	.|.	.|.	.|.	.|.	.|.	.|.	.|.	.|.	.|.	.|.	.|.	.|.	.|.
chr11:132689956-132690000	.|.	.|.	.|.	.|.	.|.	.|.	.|.	.|.	.|.	.|.	.|.	.|.	.|.	.|.	.|.	.|.	.|.	.|.	.|.	.|.	.|.	.|.	.|.	.|.	.|.	.|.	.|.	.|.	.|.	.|.	.|.	.|.	36|36	.|.	.|.	.|.	.|.	.|.	.|.	.|.	.|.	.|.	.|.	.|.	.|.	.|.	.|.	.|.	.|.
chr11:132720411-132720441	.|.	.|.	.|.	.|.	.|.	.|.	.|.	.|.	.|.	.|.	.|.	.|.	.|.	.|.	.|.	.|.	.|.	.|.	.|.	.|.	.|.	.|.	.|.	.|.	.|.	22|24	.|.	.|.	.|.	.|.	.|.	.|.	.|.	.|.	.|.	.|.	.|.	30|32	.|.	.|.	.|.	.|.	.|.	.|.	.|.	.|.	28|28	.|.	.|.
chr11:133006723-133006771	.|.	.|.	.|.	.|.	.|.	.|.	.|.	.|.	.|.	.|.	.|.	.|.	.|.	.|.	.|.	.|.	.|.	.|.	.|.	.|.	.|.	.|.	.|.	.|.	.|.	.|.	.|.	.|.	.|.	.|.	.|.	.|.	.|.	.|.	.|.	.|.	.|.	.|.	34|38	.|.	.|.	.|.	.|.	.|.	.|.	.|.	.|.	.|.	.|.
chr11:133163789-133163831	.|.	.|.	.|.	.|.	.|.	.|.	.|.	.|.	.|.	.|.	.|.	.|.	.|.	.|.	.|.	.|.	.|.	.|.	.|.	.|.	.|.	.|.	.|.	.|.	.|.	.|.	.|.	.|.	.|.	.|.	.|.	.|.	.|.	.|.	.|.	.|.	.|.	.|.	.|.	.|.	.|.	.|.	.|.	.|.	.|.	.|.	.|.	.|.	.|.
chr11:133210503-133210543	36|32	.|.	.|.	.|.	.|.	.|.	.|.	.|.	.|.	.|.	.|.	.|.	.|.	.|.	.|.	.|.	.|.	.|.	.|.	.|.	.|.	.|.	.|.	.|.	.|.	.|.	.|.	32|36	.|.	.|.	.|.	.|.	.|.	.|.	.|.	.|.	.|.	.|.	.|.	.|.	.|.	.|.	.|.	.|.	.|.	.|.	.|.	.|.	.|.
chr11:133555252-133555276	.|.	20|20	.|.	20|20	.|.	20|20	.|.	20|20	20|20	20|20	.|.	20|20	.|.	.|.	.|.	.|.	.|.	.|.	.|.	20|20	20|20	.|.	20|20	.|.	.|.	.|.	20|20	.|.	20|20	.|.	.|.	.|.	20|20	20|20	.|.	.|.	.|.	.|.	.|.	.|.	20|20	.|.	.|.	.|.	.|.	.|.	.|.	.|.	20|20
chr11:133934966-133935000	.|.	.|.	.|.	.|.	30|32	.|.	.|.	.|.	.|.	.|.	.|.	.|.	.|.	.|.	.|.	.|.	.|.	.|.	.|.	.|.	.|.	.|.	.|.	.|.	.|.	.|.	.|.	.|.	.|.	.|.	.|.	.|.	.|.	.|.	.|.	.|.	.|.	.|.	.|.	.|.	.|.	.|.	.|.	.|.	30|32	.|.	.|.	.|.	.|.
chr11:134767257-134767287	.|.	.|.	.|.	.|.	.|.	.|.	.|.	.|.	.|.	.|.	.|.	.|.	.|.	.|.	.|.	.|.	.|.	.|.	.|.	.|.	.|.	.|.	.|.	.|.	.|.	.|.	.|.	.|.	.|.	.|.	.|.	.|.	.|.	.|.	.|.	.|.	.|.	.|.	.|.	.|.	.|.	.|.	.|.	.|.	.|.	.|.	.|.	.|.	.|.
chr11:14639243-14639267	.|.	.|.	.|.	.|.	.|.	.|.	.|.	.|.	.|.	.|.	.|.	.|.	.|.	.|.	.|.	.|.	.|.	.|.	.|.	.|.	.|.	.|.	.|.	.|.	.|.	.|.	.|.	.|.	.|.	.|.	.|.	.|.	.|.	.|.	.|.	.|.	.|.	.|.	.|.	.|.	.|.	.|.	.|.	24|24	.|.	.|.	.|.	.|.	.|.
chr11:14676333-14676377	.|.	.|.	40|40	.|.	.|.	.|.	.|.	.|.	.|.	.|.	.|.	50|54	.|.	40|40	.|.	52|54	.|.	.|.	.|.	36|42	.|.	.|.	.|.	.|.	38|40	.|.	40|52	.|.	.|.	.|.	.|.	.|.	40|40	.|.	.|.	.|.	.|.	.|.	.|.	.|.	.|.	.|.	52|54	.|.	.|.	.|.	.|.	38|42	.|.
chr11:14837484-14837516	.|.	.|.	.|.	.|.	.|.	.|.	.|.	.|.	.|.	40|42	.|.	.|.	.|.	.|.	.|.	.|.	34|34	.|.	.|.	.|.	.|.	34|30	40|40	.|.	.|.	.|.	.|.	.|.	.|.	.|.	.|.	34|34	.|.	34|34	.|.	.|.	34|34	.|.	.|.	.|.	.|.	.|.	42|44	.|.	.|.	.|.	.|.	.|.	.|.
chr11:15284201-15284233	26|26	40|40	26|26	.|.	.|.	.|.	38|40	38|40	26|40	26|40	.|.	26|26	38|42	.|.	26|26	.|.	.|.	.|.	.|.	26|40	.|.	40|34	.|.	38|40	36|36	26|26	.|.	.|.	38|42	.|.	36|42	26|26	.|.	.|.	.|.	.|.	.|.	.|.	.|.	.|.	36|38	.|.	.|.	.|.	.|.	.|.	.|.	.|.	.|.
chr11:15440311-15440339	.|.	.|.	.|.	.|.	.|.	.|.	.|.	26|24	.|.	.|.	.|.	.|.	.|.	.|.	.|.	.|.	.|.	.|.	.|.	24|26	.|.	.|.	.|.	.|.	.|.	.|.	.|.	.|.	.|.	.|.	.|.	.|.	.|.	.|.	.|.	.|.	.|.	.|.	.|.	.|.	34|34	.|.	.|.	.|.	26|24	.|.	.|.	.|.	.|.
chr11:16147362-16147422	68|68	68|68	.|.	.|.	.|.	.|.	.|.	.|.	.|.	.|.	.|.	.|.	68|68	.|.	68|68	.|.	.|.	60|56	.|.	68|68	.|.	68|68	.|.	68|68	.|.	.|.	68|68	68|68	60|68	.|.	68|68	.|.	68|68	.|.	.|.	68|72	.|.	.|.	.|.	.|.	68|68	.|.	.|.	.|.	68|68	68|68	68|68	68|68	68|68
chr11:16533050-16533074	.|.	24|24	.|.	.|.	.|.	.|.	.|.	.|.	.|.	.|.	.|.	.|.	.|.	.|.	.|.	.|.	.|.	.|.	.|.	.|.	.|.	.|.	.|.	.|.	24|24	.|.	.|.	.|.	.|.	.|.	.|.	.|.	.|.	.|.	.|.	.|.	.|.	.|.	.|.	.|.	.|.	.|.	.|.	.|.	.|.	.|.	.|.	.|.	.|.
chr11:17307481-17307513	.|.	28|30	.|.	.|.	.|.	28|30	24|22	.|.	.|.	.|.	.|.	28|30	.|.	.|.	24|22	.|.	.|.	.|.	.|.	28|30	.|.	.|.	.|.	24|22	.|.	.|.	28|30	24|22	24|22	.|.	24|28	24|22	.|.	28|30	.|.	.|.	24|30	24|22	24|22	24|22	24|22	28|30	28|30	26|30	.|.	24|30	.|.	28|30	.|.
chr11:17383257-17383287	.|.	.|.	.|.	.|.	.|.	.|.	.|.	.|.	.|.	.|.	.|.	.|.	.|.	.|.	.|.	.|.	.|.	.|.	.|.	.|.	.|.	.|.	.|.	.|.	.|.	.|.	.|.	.|.	.|.	.|.	.|.	.|.	.|.	.|.	.|.	.|.	.|.	.|.	.|.	.|.	.|.	.|.	.|.	.|.	.|.	.|.	.|.	.|.	.|.
chr11:17488589-17488633	.|.	.|.	42|40	.|.	.|.	.|.	.|.	40|38	42|40	.|.	.|.	.|.	.|.	.|.	.|.	.|.	.|.	.|.	.|.	.|.	.|.	.|.	.|.	.|.	48|52	46|54	42|44	40|38	.|.	.|.	.|.	.|.	40|38	.|.	.|.	48|52	.|.	.|.	50|52	50|52	38|52	42|40	.|.	.|.	48|52	42|38	.|.	46|50	.|.
chr11:18638279-18638309	.|.	.|.	26|22	.|.	.|.	.|.	.|.	.|.	.|.	.|.	.|.	.|.	.|.	.|.	.|.	.|.	.|.	.|.	.|.	.|.	.|.	26|22	.|.	.|.	.|.	.|.	.|.	.|.	.|.	.|.	.|.	.|.	.|.	.|.	.|.	.|.	.|.	.|.	24|22	26|28	.|.	.|.	.|.	.|.	.|.	.|.	.|.	.|.	.|.
chr11:19302815-19302845	.|.	30|30	.|.	.|.	.|.	30|30	30|30	.|.	.|.	.|.	.|.	30|30	.|.	.|.	.|.	.|.	.|.	.|.	.|.	30|30	.|.	.|.	.|.	.|.	.|.	.|.	.|.	30|30	.|.	.|.	30|30	.|.	.|.	.|.	.|.	.|.	30|30	30|30	.|.	30|30	30|30	.|.	.|.	.|.	.|.	30|30	30|30	30|30	.|.
chr11:20045245-20045281	.|.	.|.	.|.	.|.	.|.	.|.	.|.	28|44	.|.	.|.	.|.	42|44	28|44	.|.	.|.	.|.	28|28	.|.	.|.	.|.	.|.	28|28	28|28	28|44	.|.	.|.	.|.	.|.	28|28	28|28	.|.	.|.	28|44	.|.	.|.	28|30	28|28	.|.	28|44	40|42	40|44	.|.	.|.	28|28	42|44	.|.	28|28	.|.	42|44
chr11:20179749-20179785	.|.	.|.	30|30	.|.	.|.	.|.	.|.	30|33	.|.	.|.	.|.	.|.	.|.	.|.	33|33	.|.	.|.	.|.	.|.	30|33	.|.	33|33	.|.	.|.	.|.	.|.	.|.	.|.	.|.	.|.	.|.	.|.	33|33	.|.	30|30	.|.	.|.	.|.	.|.	30|30	.|.	.|.	.|.	.|.	.|.	.|.	.|.	.|.	.|.
chr11:20436563-20436601	.|.	.|.	.|.	46|42	.|.	.|.	.|.	.|.	.|.	.|.	.|.	.|.	.|.	.|.	.|.	.|.	.|.	.|.	.|.	.|.	.|.	.|.	.|.	.|.	.|.	46|42	.|.	.|.	.|.	.|.	.|.	.|.	.|.	46|42	.|.	.|.	.|.	.|.	.|.	.|.	.|.	.|.	.|.	.|.	.|.	.|.	.|.	.|.	.|.
chr11:21048828-21048883	.|.	.|.	.|.	.|.	.|.	.|.	.|.	.|.	.|.	.|.	.|.	50|50	.|.	.|.	.|.	.|.	.|.	.|.	.|.	50|50	50|50	.|.	.|.	.|.	.|.	.|.	.|.	.|.	.|.	.|.	50|50	.|.	.|.	.|.	.|.	.|.	.|.	.|.	.|.	50|50	50|50	.|.	.|.	.|.	50|50	.|.	.|.	.|.	.|.
chr11:21182546-21182588	.|.	.|.	.|.	.|.	.|.	.|.	.|.	.|.	.|.	.|.	.|.	.|.	.|.	.|.	.|.	.|.	.|.	.|.	.|.	.|.	.|.	.|.	.|.	.|.	.|.	.|.	.|.	.|.	.|.	.|.	.|.	.|.	.|.	.|.	.|.	.|.	.|.	.|.	.|.	.|.	.|.	.|.	.|.	.|.	.|.	.|.	.|.	.|.	.|.
chr11:21443641-21443669	.|.	.|.	.|.	.|.	.|.	.|.	24|24	.|.	.|.	.|.	24|24	.|.	.|.	.|.	24|24	.|.	.|.	.|.	.|.	.|.	.|.	.|.	.|.	.|.	.|.	.|.	.|.	.|.	.|.	24|24	.|.	.|.	.|.	.|.	.|.	.|.	.|.	.|.	24|24	24|24	.|.	.|.	.|.	.|.	.|.	24|24	.|.	.|.	.|.
chr11:21674045-21674069	.|.	.|.	.|.	.|.	.|.	.|.	.|.	.|.	.|.	.|.	.|.	.|.	.|.	.|.	.|.	.|.	.|.	.|.	.|.	.|.	.|.	.|.	.|.	.|.	.|.	.|.	.|.	.|.	.|.	.|.	.|.	.|.	.|.	.|.	.|.	.|.	.|.	.|.	.|.	28|32	32|32	.|.	.|.	.|.	.|.	.|.	.|.	.|.	.|.
chr11:21708337-21708361	.|.	.|.	.|.	.|.	.|.	.|.	.|.	.|.	.|.	.|.	.|.	.|.	.|.	.|.	.|.	.|.	.|.	.|.	.|.	.|.	.|.	.|.	.|.	.|.	.|.	.|.	.|.	24|24	.|.	.|.	.|.	.|.	.|.	.|.	.|.	.|.	.|.	.|.	.|.	.|.	.|.	.|.	24|24	.|.	.|.	.|.	24|24	.|.	.|.
chr11:22360358-22360398	.|.	.|.	.|.	.|.	.|.	.|.	.|.	.|.	.|.	.|.	.|.	.|.	34|36	.|.	.|.	.|.	.|.	.|.	.|.	.|.	.|.	.|.	.|.	.|.	.|.	30|34	.|.	34|36	36|36	.|.	.|.	.|.	30|34	.|.	.|.	.|.	.|.	.|.	.|.	.|.	32|34	.|.	.|.	.|.	.|.	.|.	36|36	.|.	.|.
chr11:22591724-22591766	.|.	.|.	.|.	.|.	.|.	.|.	.|.	.|.	.|.	.|.	.|.	.|.	.|.	.|.	.|.	.|.	.|.	.|.	.|.	.|.	.|.	.|.	.|.	.|.	.|.	.|.	.|.	.|.	.|.	.|.	.|.	.|.	.|.	.|.	.|.	.|.	.|.	.|.	.|.	.|.	.|.	.|.	.|.	.|.	.|.	.|.	.|.	.|.	.|.
chr11:22641487-22641515	.|.	.|.	.|.	.|.	.|.	.|.	30|30	30|30	30|30	42|42	.|.	.|.	38|40	.|.	40|42	42|42	.|.	.|.	.|.	44|44	.|.	.|.	30|30	30|30	.|.	42|42	.|.	30|30	40|44	.|.	30|44	.|.	.|.	.|.	28|30	44|44	.|.	30|32	.|.	.|.	.|.	.|.	42|42	30|30	.|.	.|.	.|.	.|.	.|.
chr11:22754316-22754358	.|.	.|.	48|48	.|.	.|.	.|.	.|.	.|.	.|.	.|.	.|.	.|.	.|.	.|.	.|.	.|.	.|.	.|.	.|.	.|.	.|.	.|.	.|.	.|.	.|.	33|33	.|.	54|54	.|.	.|.	.|.	33|33	.|.	.|.	.|.	.|.	.|.	.|.	.|.	.|.	48|48	.|.	.|.	.|.	.|.	.|.	.|.	.|.	.|.
chr11:23108071-23108095	.|.	.|.	.|.	.|.	.|.	.|.	.|.	.|.	30|30	.|.	.|.	.|.	.|.	.|.	.|.	.|.	.|.	.|.	.|.	.|.	.|.	.|.	.|.	.|.	.|.	.|.	.|.	.|.	.|.	.|.	.|.	.|.	.|.	.|.	.|.	.|.	.|.	.|.	.|.	.|.	.|.	.|.	.|.	48|48	.|.	.|.	.|.	.|.	.|.
chr11:23260493-23260523	.|.	.|.	.|.	.|.	.|.	.|.	.|.	.|.	.|.	.|.	.|.	.|.	.|.	.|.	.|.	.|.	.|.	.|.	.|.	.|.	.|.	.|.	.|.	.|.	26|28	.|.	.|.	.|.	.|.	.|.	.|.	.|.	.|.	.|.	.|.	.|.	.|.	.|.	.|.	.|.	24|28	.|.	.|.	.|.	.|.	.|.	.|.	.|.	.|.
chr11:23469382-23469412	.|.	.|.	.|.	30|28	.|.	.|.	.|.	32|34	.|.	32|34	30|34	.|.	.|.	.|.	.|.	28|32	30|30	30|34	.|.	.|.	.|.	.|.	30|30	.|.	.|.	32|34	30|30	30|30	.|.	.|.	.|.	32|34	32|34	.|.	.|.	.|.	30|34	.|.	.|.	.|.	.|.	30|28	30|28	.|.	32|34	.|.	32|34	.|.	.|.
chr11:23489091-23489129	.|.	.|.	.|.	.|.	.|.	.|.	.|.	.|.	.|.	.|.	.|.	.|.	.|.	.|.	.|.	.|.	.|.	36|38	.|.	.|.	26|28	.|.	.|.	38|40	.|.	38|40	.|.	.|.	.|.	.|.	.|.	38|40	.|.	.|.	.|.	.|.	.|.	.|.	.|.	.|.	.|.	.|.	.|.	.|.	.|.	.|.	.|.	.|.	.|.
chr11:23794324-23794354	.|.	.|.	.|.	.|.	.|.	.|.	.|.	.|.	.|.	.|.	.|.	.|.	.|.	.|.	.|.	.|.	.|.	.|.	.|.	.|.	.|.	.|.	.|.	.|.	.|.	24|24	.|.	.|.	.|.	.|.	.|.	.|.	.|.	.|.	.|.	.|.	.|.	.|.	.|.	.|.	.|.	.|.	.|.	.|.	.|.	.|.	.|.	.|.	.|.
chr11:24236318-24236344	.|.	.|.	.|.	.|.	22|24	.|.	.|.	.|.	.|.	.|.	.|.	.|.	.|.	.|.	.|.	.|.	.|.	.|.	.|.	.|.	.|.	.|.	.|.	.|.	.|.	.|.	.|.	24|24	.|.	.|.	20|24	.|.	.|.	.|.	24|24	.|.	.|.	.|.	22|24	.|.	.|.	.|.	.|.	.|.	.|.	.|.	.|.	.|.	.|.
chr11:24320671-24320719	.|.	.|.	.|.	.|.	.|.	.|.	.|.	.|.	30|32	32|32	.|.	.|.	.|.	.|.	.|.	.|.	.|.	.|.	.|.	36|38	.|.	.|.	.|.	.|.	.|.	30|32	.|.	.|.	.|.	.|.	.|.	.|.	.|.	.|.	.|.	.|.	.|.	30|32	.|.	.|.	.|.	36|38	.|.	32|34	.|.	.|.	.|.	.|.	.|.
chr11:24549113-24549145	.|.	.|.	.|.	.|.	.|.	.|.	.|.	.|.	.|.	.|.	.|.	.|.	.|.	.|.	.|.	.|.	.|.	.|.	.|.	42|44	.|.	.|.	44|34	.|.	.|.	42|44	.|.	.|.	42|44	.|.	42|42	.|.	40|42	.|.	.|.	.|.	.|.	42|44	40|42	40|42	.|.	.|.	.|.	.|.	.|.	.|.	.|.	.|.	.|.
chr11:24552585-24552609	.|.	.|.	.|.	.|.	.|.	.|.	.|.	.|.	24|24	.|.	.|.	.|.	.|.	.|.	.|.	.|.	.|.	.|.	.|.	.|.	.|.	24|24	24|24	24|24	.|.	.|.	.|.	.|.	.|.	.|.	.|.	.|.	.|.	.|.	24|24	.|.	.|.	.|.	.|.	.|.	.|.	24|24	.|.	.|.	.|.	.|.	.|.	.|.	.|.
chr11:24623933-24623961	.|.	.|.	.|.	.|.	.|.	.|.	.|.	.|.	.|.	.|.	.|.	.|.	.|.	.|.	.|.	.|.	.|.	.|.	.|.	.|.	.|.	.|.	.|.	.|.	.|.	.|.	.|.	.|.	.|.	.|.	.|.	.|.	.|.	.|.	.|.	.|.	.|.	.|.	.|.	.|.	.|.	.|.	.|.	.|.	.|.	.|.	.|.	.|.	.|.
chr11:24638021-24638047	.|.	.|.	.|.	.|.	.|.	.|.	.|.	.|.	.|.	.|.	.|.	.|.	.|.	.|.	.|.	.|.	.|.	.|.	.|.	26|30	.|.	.|.	.|.	.|.	.|.	.|.	.|.	.|.	.|.	.|.	.|.	.|.	.|.	.|.	.|.	.|.	.|.	.|.	.|.	28|30	.|.	.|.	.|.	.|.	.|.	.|.	.|.	.|.	.|.
chr11:25533934-25533970	.|.	.|.	.|.	.|.	.|.	.|.	.|.	.|.	.|.	.|.	.|.	.|.	.|.	.|.	.|.	.|.	.|.	.|.	.|.	.|.	.|.	.|.	.|.	.|.	.|.	.|.	.|.	.|.	.|.	.|.	.|.	.|.	.|.	.|.	.|.	.|.	.|.	.|.	.|.	30|30	.|.	.|.	.|.	.|.	.|.	.|.	.|.	.|.	.|.
chr11:25761775-25761801	.|.	.|.	24|26	.|.	.|.	.|.	.|.	.|.	.|.	.|.	.|.	.|.	.|.	.|.	.|.	.|.	.|.	.|.	.|.	.|.	.|.	.|.	.|.	.|.	.|.	.|.	32|28	.|.	34|30	.|.	.|.	32|32	.|.	.|.	.|.	.|.	34|32	.|.	.|.	.|.	.|.	.|.	.|.	.|.	.|.	.|.	.|.	.|.	.|.
chr11:25790164-25790196	.|.	.|.	.|.	.|.	.|.	.|.	.|.	.|.	.|.	.|.	.|.	.|.	.|.	.|.	.|.	.|.	.|.	.|.	.|.	.|.	.|.	.|.	.|.	.|.	.|.	.|.	.|.	.|.	.|.	14|14	.|.	.|.	.|.	.|.	.|.	.|.	.|.	.|.	.|.	.|.	.|.	.|.	.|.	.|.	.|.	.|.	.|.	.|.	.|.
chr11:25825588-25825620	24|24	24|24	.|.	.|.	.|.	.|.	.|.	.|.	.|.	.|.	.|.	.|.	.|.	.|.	.|.	.|.	.|.	.|.	.|.	.|.	.|.	.|.	.|.	.|.	.|.	24|24	24|24	.|.	.|.	.|.	.|.	.|.	.|.	.|.	.|.	.|.	.|.	.|.	.|.	.|.	.|.	.|.	.|.	.|.	.|.	.|.	.|.	.|.	.|.
chr11:25972599-25972632	.|.	.|.	.|.	.|.	.|.	.|.	.|.	.|.	.|.	.|.	.|.	.|.	.|.	.|.	.|.	.|.	.|.	.|.	.|.	.|.	.|.	.|.	.|.	.|.	.|.	.|.	33|33	.|.	.|.	.|.	.|.	.|.	.|.	.|.	.|.	.|.	.|.	.|.	.|.	33|33	.|.	.|.	.|.	.|.	.|.	.|.	.|.	.|.	.|.
chr11:26266521-26266567	.|.	.|.	.|.	.|.	.|.	.|.	.|.	.|.	.|.	.|.	.|.	.|.	.|.	.|.	.|.	.|.	.|.	.|.	.|.	.|.	.|.	.|.	46|44	.|.	.|.	.|.	.|.	.|.	.|.	.|.	.|.	.|.	.|.	.|.	.|.	.|.	.|.	.|.	.|.	.|.	.|.	.|.	.|.	.|.	.|.	.|.	.|.	.|.	.|.
chr11:26318731-26318757	.|.	.|.	.|.	.|.	.|.	.|.	.|.	.|.	.|.	.|.	.|.	24|24	24|24	.|.	.|.	.|.	.|.	.|.	.|.	.|.	.|.	24|24	.|.	.|.	.|.	.|.	.|.	.|.	.|.	.|.	24|24	24|24	.|.	.|.	.|.	.|.	.|.	.|.	.|.	.|.	.|.	24|24	.|.	.|.	.|.	.|.	.|.	.|.	.|.
chr11:26426480-26426526	.|.	.|.	.|.	.|.	.|.	.|.	.|.	.|.	.|.	.|.	.|.	.|.	.|.	.|.	.|.	.|.	.|.	.|.	.|.	.|.	.|.	.|.	.|.	.|.	.|.	.|.	.|.	.|.	.|.	.|.	.|.	.|.	.|.	.|.	.|.	.|.	28|30	44|46	.|.	.|.	.|.	30|44	.|.	.|.	.|.	.|.	.|.	.|.	.|.
chr11:26434342-26434376	.|.	.|.	.|.	.|.	.|.	.|.	.|.	.|.	.|.	.|.	.|.	34|34	.|.	44|46	.|.	.|.	32|32	.|.	.|.	.|.	32|46	.|.	.|.	.|.	.|.	.|.	.|.	.|.	.|.	.|.	30|32	.|.	.|.	.|.	.|.	.|.	.|.	.|.	.|.	.|.	.|.	44|46	.|.	.|.	.|.	.|.	.|.	.|.	.|.
chr11:26584942-26584978	.|.	.|.	.|.	.|.	.|.	.|.	.|.	.|.	.|.	.|.	.|.	.|.	.|.	.|.	.|.	.|.	.|.	.|.	.|.	.|.	.|.	.|.	.|.	.|.	.|.	.|.	.|.	.|.	34|38	.|.	.|.	.|.	.|.	.|.	.|.	.|.	.|.	.|.	.|.	.|.	.|.	.|.	.|.	.|.	.|.	.|.	28|28	.|.	36|38
chr11:26727472-26727526	.|.	36|40	.|.	.|.	38|40	.|.	.|.	.|.	.|.	38|40	.|.	34|36	36|38	.|.	.|.	.|.	.|.	.|.	.|.	44|40	.|.	42|44	.|.	44|40	.|.	.|.	.|.	.|.	44|40	.|.	44|38	36|40	36|40	.|.	.|.	.|.	44|40	.|.	.|.	.|.	44|40	38|40	.|.	.|.	34|36	40|40	.|.	.|.	42|44
chr11:26733846-26733870	24|24	.|.	.|.	.|.	.|.	.|.	.|.	.|.	.|.	.|.	.|.	24|24	.|.	.|.	.|.	.|.	.|.	.|.	.|.	.|.	.|.	.|.	.|.	.|.	.|.	.|.	.|.	.|.	.|.	.|.	.|.	.|.	.|.	.|.	.|.	.|.	.|.	.|.	.|.	.|.	.|.	.|.	.|.	.|.	.|.	.|.	.|.	.|.	.|.
chr11:27107102-27107142	.|.	.|.	32|34	.|.	.|.	32|34	30|32	.|.	.|.	.|.	.|.	.|.	.|.	28|32	.|.	.|.	.|.	34|34	.|.	32|34	.|.	.|.	30|34	.|.	.|.	.|.	.|.	32|34	32|34	.|.	32|34	.|.	30|34	.|.	28|30	.|.	32|34	.|.	.|.	30|32	.|.	.|.	.|.	.|.	.|.	.|.	.|.	30|32	.|.
chr11:27330977-27331007	.|.	.|.	26|28	.|.	26|28	.|.	.|.	.|.	.|.	.|.	.|.	.|.	20|20	.|.	28|28	20|20	.|.	26|28	.|.	20|28	.|.	.|.	.|.	28|28	26|28	26|28	26|28	.|.	28|28	.|.	26|28	.|.	20|20	.|.	20|22	20|20	.|.	.|.	28|28	.|.	26|28	26|28	26|28	.|.	.|.	20|20	.|.	.|.	.|.
chr11:27739407-27739439	.|.	.|.	.|.	.|.	.|.	.|.	.|.	.|.	.|.	.|.	.|.	.|.	.|.	.|.	.|.	.|.	.|.	.|.	.|.	.|.	.|.	.|.	28|28	.|.	.|.	.|.	.|.	.|.	.|.	.|.	.|.	.|.	.|.	.|.	.|.	28|24	.|.	.|.	.|.	.|.	.|.	.|.	.|.	.|.	.|.	.|.	.|.	.|.	.|.
chr11:28011720-28011760	.|.	.|.	.|.	.|.	.|.	.|.	.|.	.|.	.|.	.|.	.|.	.|.	.|.	.|.	.|.	.|.	.|.	.|.	.|.	.|.	.|.	.|.	.|.	.|.	.|.	28|28	.|.	.|.	.|.	.|.	.|.	28|28	.|.	.|.	.|.	.|.	.|.	.|.	.|.	.|.	.|.	.|.	.|.	.|.	.|.	.|.	.|.	.|.	.|.
chr11:28595541-28595567	.|.	.|.	.|.	.|.	.|.	.|.	.|.	.|.	26|28	.|.	.|.	.|.	.|.	.|.	.|.	.|.	.|.	.|.	.|.	.|.	.|.	.|.	.|.	.|.	.|.	.|.	.|.	.|.	.|.	.|.	.|.	.|.	.|.	.|.	.|.	.|.	.|.	.|.	.|.	.|.	.|.	.|.	.|.	.|.	.|.	.|.	.|.	.|.	.|.
chr11:28754734-28754768	.|.	.|.	.|.	.|.	.|.	.|.	.|.	.|.	.|.	.|.	.|.	.|.	.|.	.|.	.|.	.|.	.|.	.|.	.|.	.|.	.|.	.|.	.|.	.|.	26|28	.|.	.|.	.|.	.|.	.|.	.|.	.|.	.|.	.|.	.|.	.|.	.|.	.|.	.|.	.|.	.|.	.|.	.|.	.|.	.|.	.|.	.|.	.|.	.|.
chr11:28886819-28886869	.|.	.|.	.|.	.|.	.|.	.|.	.|.	.|.	.|.	.|.	.|.	.|.	.|.	.|.	.|.	.|.	.|.	.|.	.|.	.|.	.|.	.|.	.|.	.|.	.|.	.|.	.|.	.|.	.|.	.|.	.|.	.|.	26|30	.|.	.|.	.|.	.|.	.|.	.|.	.|.	.|.	.|.	.|.	.|.	26|26	.|.	.|.	.|.	.|.
chr11:29706275-29706319	.|.	44|46	46|48	.|.	.|.	.|.	36|36	.|.	34|36	46|48	.|.	34|36	34|36	36|48	36|46	36|32	.|.	.|.	.|.	36|36	36|32	.|.	.|.	.|.	.|.	.|.	.|.	.|.	34|36	.|.	.|.	.|.	44|36	.|.	.|.	44|46	.|.	.|.	.|.	.|.	46|48	44|46	.|.	34|36	44|48	.|.	36|36	.|.	.|.
chr11:29800341-29800369	.|.	22|22	28|26	.|.	28|26	.|.	.|.	22|22	.|.	.|.	.|.	.|.	.|.	.|.	.|.	.|.	26|26	.|.	.|.	.|.	.|.	.|.	28|26	22|22	28|28	.|.	.|.	.|.	22|22	.|.	20|22	.|.	28|22	.|.	.|.	.|.	.|.	20|22	22|22	22|26	28|26	.|.	.|.	.|.	20|22	28|26	28|26	28|26	28|26
chr11:29934689-29934733	.|.	.|.	.|.	.|.	.|.	.|.	.|.	.|.	.|.	.|.	.|.	.|.	.|.	.|.	.|.	.|.	.|.	.|.	.|.	34|36	.|.	.|.	.|.	.|.	.|.	.|.	.|.	.|.	.|.	.|.	.|.	.|.	.|.	.|.	.|.	.|.	.|.	.|.	.|.	.|.	.|.	.|.	.|.	.|.	.|.	.|.	.|.	.|.	.|.
chr11:30485815-30485845	.|.	.|.	.|.	.|.	.|.	.|.	.|.	.|.	.|.	.|.	.|.	.|.	.|.	.|.	.|.	34|36	.|.	.|.	.|.	.|.	.|.	.|.	.|.	.|.	.|.	34|36	.|.	.|.	.|.	.|.	.|.	.|.	.|.	.|.	.|.	.|.	.|.	.|.	.|.	.|.	.|.	.|.	.|.	.|.	.|.	.|.	.|.	.|.	.|.
chr11:30543934-30543970	.|.	.|.	.|.	.|.	.|.	32|32	.|.	.|.	.|.	36|36	.|.	30|32	.|.	.|.	.|.	.|.	.|.	.|.	.|.	.|.	.|.	.|.	.|.	.|.	.|.	.|.	.|.	.|.	.|.	.|.	.|.	.|.	.|.	.|.	.|.	.|.	.|.	.|.	.|.	.|.	.|.	.|.	.|.	.|.	.|.	.|.	.|.	.|.	.|.
chr11:30618091-30618115	.|.	.|.	.|.	.|.	.|.	.|.	.|.	.|.	.|.	.|.	.|.	.|.	.|.	.|.	.|.	.|.	.|.	.|.	.|.	.|.	.|.	.|.	.|.	.|.	.|.	.|.	.|.	.|.	.|.	.|.	24|28	.|.	.|.	.|.	.|.	.|.	.|.	24|28	.|.	.|.	.|.	.|.	28|28	.|.	.|.	.|.	.|.	.|.	.|.
chr11:30775923-30775955	.|.	.|.	.|.	.|.	.|.	.|.	.|.	.|.	.|.	.|.	.|.	32|28	.|.	32|32	.|.	.|.	.|.	28|28	.|.	.|.	.|.	.|.	.|.	.|.	.|.	.|.	.|.	.|.	.|.	.|.	.|.	.|.	.|.	.|.	.|.	.|.	.|.	.|.	.|.	.|.	.|.	.|.	.|.	.|.	.|.	.|.	.|.	.|.	.|.
chr11:31951994-31952032	.|.	.|.	.|.	.|.	.|.	40|42	.|.	.|.	.|.	.|.	.|.	.|.	.|.	.|.	.|.	.|.	.|.	.|.	.|.	.|.	.|.	.|.	.|.	.|.	.|.	.|.	.|.	.|.	42|44	.|.	.|.	.|.	.|.	.|.	.|.	32|36	.|.	.|.	.|.	.|.	.|.	.|.	.|.	40|44	.|.	.|.	.|.	.|.	.|.
chr11:32058154-32058184	.|.	.|.	28|28	.|.	.|.	.|.	.|.	.|.	.|.	.|.	.|.	30|32	.|.	.|.	32|34	.|.	.|.	.|.	.|.	30|32	.|.	30|32	.|.	.|.	.|.	.|.	32|32	30|32	30|32	.|.	.|.	.|.	26|28	.|.	.|.	.|.	.|.	.|.	30|32	.|.	.|.	.|.	.|.	.|.	.|.	.|.	.|.	.|.	.|.
chr11:32343013-32343037	.|.	.|.	.|.	.|.	.|.	.|.	.|.	.|.	.|.	.|.	.|.	.|.	.|.	.|.	.|.	.|.	.|.	.|.	.|.	.|.	.|.	.|.	.|.	24|24	.|.	.|.	.|.	24|24	.|.	.|.	24|24	.|.	.|.	.|.	.|.	.|.	.|.	.|.	24|24	.|.	24|24	.|.	.|.	.|.	.|.	.|.	.|.	.|.	.|.
chr11:32361563-32361587	22|34	22|32	22|32	32|32	22|32	34|28	22|32	22|32	.|.	22|32	22|32	22|32	22|32	30|34	30|34	.|.	.|.	32|36	.|.	22|34	22|34	34|34	22|34	34|34	22|34	22|32	22|34	22|34	22|34	32|34	22|34	34|34	22|34	30|32	32|36	24|34	22|34	22|34	22|34	22|34	22|34	22|32	22|34	22|34	22|34	22|34	22|34	22|34	22|34
chr11:32432614-32432640	.|.	.|.	.|.	.|.	.|.	.|.	.|.	.|.	.|.	.|.	.|.	.|.	.|.	.|.	.|.	.|.	.|.	.|.	.|.	.|.	.|.	.|.	.|.	.|.	.|.	.|.	.|.	22|24	.|.	.|.	.|.	.|.	.|.	.|.	.|.	.|.	.|.	.|.	.|.	.|.	.|.	.|.	.|.	.|.	.|.	.|.	.|.	.|.	.|.
chr11:32602980-32603022	.|.	.|.	.|.	.|.	.|.	42|44	.|.	.|.	.|.	44|44	.|.	.|.	.|.	.|.	.|.	.|.	.|.	.|.	.|.	44|46	.|.	.|.	46|48	.|.	.|.	.|.	.|.	.|.	44|46	.|.	.|.	.|.	.|.	.|.	.|.	.|.	.|.	.|.	44|46	.|.	.|.	.|.	46|50	44|46	.|.	44|46	.|.	44|46	.|.
chr11:33024200-33024232	.|.	.|.	.|.	.|.	.|.	.|.	.|.	.|.	.|.	26|28	.|.	.|.	.|.	.|.	.|.	.|.	.|.	24|26	.|.	.|.	.|.	26|28	.|.	.|.	.|.	.|.	26|26	.|.	.|.	.|.	26|28	.|.	26|28	24|28	.|.	.|.	.|.	.|.	.|.	.|.	.|.	.|.	.|.	.|.	.|.	.|.	.|.	.|.	.|.
chr11:33330159-33330187	.|.	.|.	.|.	.|.	.|.	.|.	.|.	.|.	.|.	.|.	.|.	.|.	.|.	.|.	.|.	.|.	.|.	.|.	.|.	28|26	.|.	.|.	.|.	.|.	.|.	.|.	.|.	.|.	.|.	.|.	.|.	28|26	.|.	.|.	28|26	.|.	.|.	.|.	.|.	.|.	.|.	.|.	.|.	.|.	.|.	.|.	.|.	.|.	.|.
chr11:33389332-33389356	.|.	.|.	.|.	.|.	.|.	.|.	.|.	.|.	24|24	.|.	.|.	.|.	.|.	.|.	.|.	.|.	.|.	.|.	24|24	.|.	24|24	24|24	.|.	24|24	.|.	24|24	30|30	.|.	.|.	24|24	.|.	.|.	.|.	.|.	.|.	.|.	.|.	24|24	30|30	.|.	.|.	30|30	.|.	.|.	30|30	24|24	.|.	.|.	24|24
chr11:3369241-3369265	.|.	.|.	24|24	.|.	.|.	.|.	.|.	.|.	.|.	.|.	.|.	.|.	.|.	.|.	.|.	.|.	.|.	.|.	.|.	.|.	.|.	24|24	.|.	.|.	.|.	.|.	.|.	.|.	.|.	.|.	.|.	.|.	.|.	.|.	.|.	.|.	.|.	.|.	.|.	.|.	.|.	.|.	.|.	.|.	.|.	.|.	.|.	.|.	.|.
chr11:33723300-33723328	.|.	.|.	.|.	.|.	.|.	.|.	48|52	.|.	28|28	.|.	.|.	.|.	28|50	.|.	.|.	.|.	.|.	.|.	.|.	.|.	.|.	.|.	.|.	.|.	.|.	.|.	28|28	28|28	.|.	.|.	.|.	46|50	48|52	.|.	48|52	.|.	48|52	.|.	.|.	28|50	.|.	48|52	28|24	.|.	.|.	.|.	28|28	.|.	.|.
chr11:33892747-33892787	.|.	.|.	.|.	.|.	.|.	34|34	32|34	.|.	.|.	.|.	.|.	22|22	22|24	.|.	.|.	.|.	.|.	.|.	22|22	.|.	.|.	.|.	.|.	.|.	.|.	.|.	22|22	.|.	.|.	.|.	.|.	34|24	.|.	.|.	.|.	.|.	.|.	.|.	22|22	.|.	.|.	.|.	.|.	.|.	.|.	30|34	.|.	.|.	32|34
chr11:34202784-34202808	.|.	.|.	24|24	24|24	24|24	.|.	24|24	24|24	.|.	24|24	.|.	24|24	24|24	.|.	24|24	24|24	.|.	.|.	.|.	24|24	24|24	24|24	.|.	24|24	.|.	24|24	24|24	.|.	.|.	.|.	24|24	.|.	24|24	.|.	.|.	24|24	24|24	24|24	.|.	24|24	24|24	.|.	24|24	.|.	24|24	24|24	24|24	24|24	24|24
chr11:34388343-34388367	24|24	.|.	24|24	.|.	24|24	24|24	24|24	.|.	24|24	.|.	.|.	.|.	.|.	.|.	.|.	.|.	.|.	.|.	.|.	.|.	20|20	.|.	20|20	.|.	20|20	.|.	20|20	.|.	24|24	.|.	24|24	.|.	20|20	.|.	.|.	24|24	.|.	.|.	.|.	24|24	.|.	24|24	.|.	.|.	24|20	.|.	.|.	24|24	.|.
chr11:34648659-34648691	.|.	.|.	36|38	.|.	40|42	.|.	.|.	.|.	.|.	.|.	.|.	.|.	.|.	36|38	.|.	.|.	.|.	.|.	.|.	24|24	.|.	.|.	.|.	24|24	.|.	.|.	.|.	.|.	36|36	.|.	.|.	.|.	.|.	.|.	.|.	.|.	34|36	.|.	.|.	.|.	.|.	.|.	.|.	.|.	24|24	.|.	.|.	24|24	.|.
chr11:34944411-34944445	.|.	.|.	.|.	.|.	.|.	.|.	.|.	.|.	.|.	.|.	.|.	.|.	.|.	.|.	.|.	.|.	.|.	.|.	34|32	34|32	.|.	22|24	.|.	.|.	.|.	34|24	32|24	.|.	22|24	.|.	.|.	.|.	.|.	.|.	24|24	.|.	.|.	.|.	.|.	.|.	.|.	.|.	.|.	.|.	.|.	22|24	.|.	.|.	.|.
chr11:35083767-35083791	.|.	.|.	.|.	24|24	24|24	.|.	.|.	24|24	.|.	.|.	.|.	.|.	.|.	.|.	.|.	.|.	.|.	.|.	.|.	.|.	.|.	.|.	.|.	.|.	.|.	.|.	.|.	.|.	24|24	.|.	.|.	.|.	.|.	.|.	.|.	.|.	.|.	.|.	.|.	.|.	.|.	.|.	.|.	24|24	.|.	.|.	.|.	.|.	.|.
chr11:35813622-35813662	.|.	.|.	20|20	.|.	.|.	.|.	.|.	.|.	.|.	.|.	.|.	20|20	.|.	.|.	.|.	.|.	.|.	.|.	.|.	20|20	20|20	.|.	20|20	.|.	20|20	.|.	20|20	.|.	.|.	.|.	.|.	.|.	20|20	.|.	.|.	20|20	18|20	.|.	.|.	.|.	.|.	.|.	20|20	.|.	.|.	.|.	.|.	20|20	20|20
chr11:36162542-36162586	.|.	.|.	.|.	.|.	.|.	.|.	.|.	.|.	.|.	.|.	.|.	.|.	.|.	.|.	.|.	.|.	.|.	.|.	.|.	.|.	.|.	.|.	.|.	.|.	.|.	.|.	.|.	.|.	.|.	.|.	.|.	.|.	.|.	.|.	.|.	.|.	.|.	.|.	.|.	.|.	.|.	.|.	.|.	.|.	.|.	.|.	.|.	.|.	.|.
chr11:36347852-36347886	.|.	.|.	.|.	.|.	.|.	.|.	.|.	.|.	.|.	.|.	.|.	.|.	.|.	.|.	.|.	.|.	.|.	.|.	.|.	.|.	.|.	.|.	.|.	34|32	.|.	.|.	.|.	34|32	.|.	.|.	.|.	.|.	26|26	.|.	.|.	.|.	.|.	.|.	.|.	.|.	.|.	.|.	.|.	.|.	.|.	.|.	.|.	.|.	.|.
chr11:36666543-36666567	.|.	.|.	.|.	.|.	.|.	.|.	.|.	.|.	.|.	.|.	.|.	.|.	.|.	.|.	.|.	.|.	.|.	.|.	24|24	24|24	.|.	.|.	24|24	.|.	.|.	.|.	.|.	.|.	.|.	.|.	24|24	.|.	24|24	.|.	.|.	.|.	.|.	24|24	.|.	.|.	.|.	.|.	.|.	.|.	.|.	.|.	24|21	.|.	.|.
chr11:37134525-37134555	.|.	.|.	.|.	.|.	.|.	.|.	.|.	.|.	.|.	.|.	.|.	.|.	.|.	.|.	.|.	.|.	.|.	.|.	.|.	.|.	.|.	.|.	.|.	.|.	.|.	.|.	.|.	.|.	.|.	.|.	.|.	.|.	.|.	.|.	.|.	.|.	.|.	.|.	.|.	.|.	.|.	34|36	.|.	.|.	.|.	.|.	.|.	.|.	.|.
chr11:37154079-37154115	42|42	.|.	.|.	.|.	.|.	.|.	.|.	.|.	.|.	.|.	.|.	.|.	.|.	.|.	.|.	38|40	.|.	.|.	.|.	.|.	.|.	.|.	.|.	.|.	.|.	38|40	42|42	.|.	38|40	.|.	.|.	.|.	.|.	.|.	.|.	.|.	.|.	.|.	42|42	42|42	40|42	.|.	.|.	.|.	.|.	40|42	.|.	.|.	.|.
chr11:37195205-37195231	.|.	.|.	.|.	.|.	.|.	.|.	.|.	.|.	.|.	.|.	.|.	.|.	.|.	.|.	.|.	.|.	.|.	.|.	.|.	.|.	.|.	28|28	.|.	.|.	.|.	.|.	.|.	.|.	.|.	.|.	.|.	.|.	.|.	.|.	36|38	.|.	.|.	.|.	.|.	.|.	28|28	.|.	.|.	.|.	.|.	.|.	.|.	.|.	.|.
chr11:37298535-37298571	.|.	22|22	30|30	.|.	30|30	.|.	.|.	30|30	22|22	.|.	.|.	22|22	.|.	.|.	.|.	22|22	.|.	.|.	.|.	.|.	.|.	22|22	30|34	.|.	.|.	.|.	22|34	34|36	.|.	.|.	.|.	.|.	34|36	.|.	.|.	22|34	.|.	22|26	.|.	34|36	22|36	22|22	.|.	22|36	22|22	34|36	22|22	.|.	.|.
chr11:37457843-37457871	.|.	.|.	24|24	.|.	28|28	24|24	.|.	.|.	.|.	.|.	.|.	28|28	28|30	.|.	.|.	24|24	.|.	.|.	.|.	28|26	.|.	28|28	.|.	24|24	.|.	28|28	.|.	28|28	.|.	.|.	.|.	.|.	24|24	28|28	.|.	28|28	.|.	.|.	24|24	.|.	28|24	28|28	.|.	28|26	.|.	.|.	.|.	.|.	.|.
chr11:37462618-37462642	.|.	.|.	28|28	.|.	.|.	28|28	.|.	.|.	.|.	.|.	.|.	.|.	.|.	.|.	28|28	.|.	.|.	.|.	.|.	.|.	.|.	28|28	28|28	.|.	.|.	.|.	.|.	.|.	22|22	.|.	22|22	.|.	.|.	.|.	.|.	.|.	.|.	.|.	.|.	.|.	.|.	.|.	28|28	.|.	28|28	.|.	.|.	.|.	.|.
chr11:37545064-37545098	.|.	.|.	.|.	.|.	.|.	.|.	.|.	.|.	.|.	.|.	.|.	.|.	.|.	.|.	.|.	.|.	.|.	.|.	.|.	.|.	.|.	.|.	.|.	.|.	.|.	.|.	.|.	.|.	.|.	.|.	.|.	.|.	.|.	.|.	.|.	.|.	.|.	.|.	.|.	.|.	32|36	.|.	.|.	.|.	.|.	.|.	.|.	.|.	.|.
chr11:37748429-37748457	28|26	.|.	.|.	.|.	.|.	.|.	.|.	.|.	.|.	.|.	.|.	.|.	.|.	22|24	.|.	.|.	.|.	.|.	.|.	.|.	.|.	.|.	.|.	.|.	.|.	.|.	.|.	.|.	.|.	.|.	.|.	.|.	.|.	.|.	.|.	.|.	.|.	.|.	.|.	.|.	.|.	.|.	24|26	.|.	.|.	.|.	.|.	.|.	.|.
chr11:37873658-37873690	.|.	.|.	.|.	.|.	.|.	.|.	.|.	.|.	.|.	.|.	.|.	.|.	.|.	.|.	.|.	.|.	.|.	.|.	.|.	.|.	26|26	.|.	.|.	.|.	.|.	.|.	.|.	.|.	.|.	.|.	.|.	.|.	.|.	.|.	.|.	.|.	.|.	26|26	.|.	.|.	.|.	.|.	.|.	.|.	.|.	.|.	.|.	.|.	.|.
chr11:37985402-37985444	.|.	.|.	.|.	.|.	.|.	.|.	.|.	.|.	.|.	.|.	.|.	.|.	.|.	.|.	.|.	.|.	.|.	42|44	.|.	.|.	42|44	.|.	.|.	.|.	.|.	28|28	28|44	.|.	28|28	.|.	.|.	.|.	.|.	.|.	.|.	.|.	.|.	28|28	.|.	.|.	28|28	.|.	.|.	.|.	.|.	.|.	.|.	.|.	.|.
chr11:37995382-37995426	.|.	.|.	.|.	.|.	.|.	.|.	.|.	.|.	.|.	.|.	.|.	.|.	.|.	.|.	.|.	.|.	.|.	.|.	.|.	.|.	34|36	.|.	.|.	.|.	36|36	.|.	.|.	34|36	.|.	.|.	.|.	.|.	.|.	32|36	.|.	.|.	.|.	.|.	.|.	.|.	34|34	.|.	.|.	.|.	.|.	.|.	.|.	.|.	.|.
chr11:38174525-38174563	.|.	.|.	.|.	.|.	.|.	.|.	.|.	.|.	.|.	.|.	.|.	.|.	.|.	.|.	.|.	.|.	.|.	.|.	.|.	.|.	26|26	.|.	26|26	.|.	.|.	.|.	.|.	.|.	.|.	.|.	.|.	.|.	.|.	.|.	.|.	.|.	.|.	.|.	.|.	.|.	.|.	26|26	.|.	.|.	.|.	.|.	.|.	28|28	.|.
chr11:38397743-38397779	.|.	.|.	.|.	32|32	28|30	.|.	.|.	.|.	.|.	.|.	.|.	.|.	.|.	.|.	.|.	.|.	.|.	.|.	.|.	.|.	.|.	.|.	.|.	.|.	.|.	.|.	.|.	.|.	.|.	.|.	.|.	.|.	.|.	.|.	.|.	.|.	.|.	.|.	.|.	.|.	30|32	.|.	.|.	.|.	.|.	.|.	.|.	.|.	.|.
chr11:39065198-39065238	.|.	.|.	.|.	.|.	.|.	.|.	.|.	.|.	.|.	.|.	.|.	.|.	.|.	48|50	.|.	.|.	.|.	.|.	.|.	.|.	.|.	.|.	.|.	.|.	.|.	.|.	.|.	.|.	.|.	48|50	.|.	.|.	.|.	.|.	.|.	.|.	.|.	.|.	.|.	.|.	.|.	.|.	.|.	.|.	44|46	.|.	.|.	.|.	.|.
chr11:39720624-39720648	.|.	.|.	.|.	.|.	.|.	.|.	.|.	.|.	24|32	32|32	.|.	.|.	32|32	.|.	.|.	.|.	.|.	32|32	.|.	24|32	24|24	.|.	.|.	24|24	.|.	32|32	24|24	.|.	24|32	24|24	24|32	.|.	24|24	32|32	.|.	32|32	32|32	32|32	24|24	32|32	24|32	.|.	24|24	32|32	.|.	24|24	24|24	24|32	24|24
chr11:40230498-40230530	34|38	.|.	38|40	.|.	.|.	.|.	.|.	32|34	.|.	36|40	.|.	.|.	.|.	.|.	.|.	.|.	.|.	.|.	32|36	.|.	.|.	.|.	32|34	.|.	.|.	30|34	.|.	.|.	32|34	.|.	36|38	.|.	30|34	.|.	.|.	.|.	.|.	.|.	32|38	.|.	30|34	.|.	.|.	.|.	.|.	30|34	34|38	34|38	30|34
chr11:41865926-41865962	.|.	.|.	.|.	.|.	.|.	.|.	.|.	.|.	.|.	.|.	.|.	.|.	.|.	.|.	.|.	.|.	.|.	.|.	.|.	.|.	.|.	.|.	.|.	.|.	.|.	.|.	.|.	.|.	.|.	.|.	.|.	.|.	.|.	.|.	.|.	.|.	.|.	.|.	36|38	.|.	.|.	.|.	.|.	.|.	.|.	.|.	.|.	.|.	.|.
chr11:41867922-41867960	.|.	.|.	.|.	.|.	.|.	.|.	.|.	.|.	.|.	.|.	.|.	.|.	.|.	.|.	.|.	.|.	.|.	.|.	.|.	.|.	.|.	.|.	.|.	.|.	.|.	.|.	.|.	38|40	.|.	.|.	38|40	.|.	.|.	.|.	.|.	.|.	.|.	.|.	.|.	.|.	.|.	.|.	.|.	32|34	.|.	.|.	.|.	.|.	.|.
chr11:41946646-41946672	.|.	.|.	.|.	.|.	.|.	.|.	.|.	.|.	.|.	.|.	.|.	.|.	.|.	.|.	.|.	.|.	.|.	.|.	.|.	.|.	.|.	26|26	24|24	.|.	.|.	.|.	.|.	26|26	.|.	.|.	.|.	.|.	.|.	.|.	24|24	.|.	.|.	.|.	.|.	.|.	.|.	.|.	.|.	.|.	.|.	.|.	.|.	.|.	.|.
chr11:41986482-41986512	.|.	.|.	.|.	.|.	.|.	.|.	.|.	.|.	.|.	.|.	.|.	.|.	.|.	.|.	.|.	.|.	.|.	.|.	.|.	.|.	.|.	.|.	33|33	.|.	.|.	.|.	.|.	.|.	.|.	.|.	.|.	.|.	.|.	.|.	.|.	.|.	.|.	.|.	.|.	.|.	.|.	.|.	.|.	.|.	.|.	.|.	.|.	.|.	.|.
chr11:42660650-42660680	.|.	.|.	.|.	32|34	34|34	.|.	.|.	.|.	.|.	.|.	.|.	34|36	.|.	.|.	.|.	.|.	.|.	.|.	.|.	.|.	.|.	.|.	.|.	.|.	.|.	.|.	.|.	.|.	.|.	.|.	.|.	.|.	.|.	.|.	30|32	.|.	.|.	.|.	.|.	.|.	.|.	.|.	.|.	32|34	.|.	.|.	.|.	.|.	.|.
chr11:42977181-42977225	50|52	50|52	50|52	50|52	.|.	.|.	.|.	.|.	.|.	44|46	.|.	.|.	.|.	.|.	.|.	44|46	.|.	.|.	.|.	50|52	50|52	50|52	.|.	.|.	50|52	.|.	44|46	.|.	.|.	44|42	46|42	.|.	44|48	.|.	.|.	50|52	.|.	.|.	50|52	.|.	44|46	46|46	.|.	.|.	50|52	.|.	50|52	.|.	.|.
chr11:43389264-43389296	32|32	.|.	.|.	.|.	.|.	.|.	32|30	.|.	.|.	.|.	.|.	34|34	.|.	.|.	32|32	32|30	.|.	.|.	.|.	32|30	32|30	.|.	32|30	.|.	32|30	.|.	32|30	.|.	.|.	.|.	32|32	.|.	32|30	32|30	32|30	.|.	.|.	.|.	.|.	32|30	30|32	30|32	.|.	32|30	.|.	.|.	32|32	32|30	.|.
chr11:45526218-45526264	.|.	.|.	.|.	.|.	.|.	.|.	.|.	.|.	.|.	.|.	.|.	.|.	.|.	.|.	.|.	.|.	.|.	.|.	.|.	.|.	.|.	.|.	.|.	.|.	.|.	.|.	.|.	.|.	.|.	.|.	.|.	.|.	.|.	.|.	.|.	.|.	.|.	.|.	40|42	.|.	.|.	.|.	.|.	.|.	.|.	.|.	.|.	.|.	.|.
chr11:45728834-45728866	.|.	.|.	32|34	.|.	26|34	.|.	.|.	.|.	24|26	26|26	.|.	.|.	.|.	26|26	.|.	.|.	.|.	.|.	.|.	.|.	.|.	.|.	.|.	26|26	.|.	.|.	.|.	26|34	.|.	.|.	26|34	.|.	.|.	.|.	.|.	.|.	32|34	.|.	.|.	.|.	32|34	28|34	.|.	.|.	.|.	.|.	.|.	.|.	32|34
chr11:46007635-46007659	.|.	.|.	.|.	.|.	46|48	.|.	.|.	44|46	.|.	.|.	.|.	.|.	.|.	.|.	.|.	.|.	.|.	.|.	.|.	.|.	.|.	.|.	.|.	.|.	.|.	.|.	.|.	.|.	50|50	.|.	.|.	.|.	.|.	.|.	.|.	.|.	44|48	.|.	.|.	.|.	.|.	.|.	.|.	.|.	.|.	.|.	.|.	.|.	.|.
chr11:46062441-46062485	.|.	.|.	.|.	.|.	.|.	.|.	32|36	.|.	.|.	.|.	.|.	.|.	.|.	.|.	.|.	.|.	.|.	.|.	.|.	32|36	.|.	.|.	.|.	.|.	32|36	.|.	.|.	.|.	34|36	.|.	.|.	.|.	.|.	.|.	.|.	.|.	.|.	.|.	.|.	.|.	.|.	.|.	.|.	.|.	.|.	.|.	.|.	.|.	.|.
chr11:47828342-47828404	.|.	.|.	.|.	.|.	.|.	.|.	.|.	.|.	.|.	.|.	.|.	.|.	.|.	.|.	.|.	.|.	.|.	.|.	.|.	.|.	.|.	.|.	.|.	.|.	.|.	.|.	.|.	.|.	.|.	.|.	.|.	.|.	.|.	62|68	.|.	.|.	.|.	.|.	.|.	.|.	.|.	.|.	.|.	.|.	.|.	.|.	.|.	.|.	.|.
chr11:4787923-4787947	.|.	.|.	.|.	.|.	.|.	.|.	.|.	.|.	.|.	.|.	.|.	.|.	.|.	.|.	.|.	.|.	.|.	.|.	.|.	.|.	.|.	.|.	.|.	.|.	.|.	.|.	.|.	.|.	.|.	.|.	.|.	.|.	.|.	.|.	.|.	.|.	.|.	.|.	.|.	.|.	.|.	.|.	.|.	.|.	.|.	28|28	.|.	.|.	.|.
chr11:48043321-48043346	.|.	.|.	.|.	.|.	.|.	.|.	.|.	.|.	.|.	.|.	.|.	.|.	.|.	.|.	.|.	.|.	.|.	.|.	25|25	.|.	.|.	.|.	25|25	.|.	.|.	.|.	.|.	.|.	.|.	.|.	25|25	.|.	.|.	.|.	.|.	.|.	.|.	25|25	25|25	.|.	.|.	.|.	25|25	.|.	.|.	.|.	25|25	.|.	.|.
chr11:48260700-48260728	.|.	.|.	.|.	26|24	.|.	.|.	.|.	.|.	.|.	.|.	.|.	.|.	.|.	.|.	.|.	.|.	30|32	.|.	.|.	.|.	.|.	.|.	26|24	.|.	.|.	.|.	30|32	.|.	.|.	.|.	.|.	.|.	.|.	.|.	.|.	26|26	.|.	.|.	.|.	.|.	.|.	.|.	.|.	.|.	.|.	.|.	.|.	.|.	.|.
chr11:48276458-48276494	.|.	.|.	30|32	.|.	.|.	.|.	.|.	.|.	.|.	.|.	.|.	.|.	.|.	.|.	.|.	.|.	.|.	.|.	.|.	30|32	.|.	.|.	.|.	.|.	.|.	.|.	.|.	.|.	.|.	.|.	.|.	30|32	.|.	.|.	.|.	.|.	.|.	.|.	.|.	.|.	.|.	.|.	.|.	.|.	30|32	.|.	.|.	.|.	.|.
chr11:49244359-49244387	28|26	28|26	.|.	.|.	28|26	28|26	28|26	28|26	28|26	28|26	.|.	28|26	28|26	28|26	.|.	.|.	.|.	.|.	.|.	28|26	28|26	28|26	.|.	28|26	.|.	.|.	28|26	28|28	.|.	.|.	28|26	.|.	28|26	.|.	28|26	28|26	.|.	28|26	28|26	28|26	28|26	28|26	28|26	28|26	.|.	28|26	26|26	28|26	.|.
chr11:49324694-49324728	.|.	28|32	.|.	.|.	.|.	.|.	26|28	.|.	.|.	28|32	.|.	.|.	.|.	.|.	.|.	32|36	.|.	.|.	.|.	26|28	.|.	.|.	.|.	.|.	.|.	.|.	.|.	.|.	.|.	.|.	.|.	.|.	.|.	.|.	.|.	.|.	.|.	.|.	.|.	.|.	.|.	.|.	26|28	.|.	.|.	.|.	.|.	.|.	.|.
chr11:49690414-49690458	.|.	.|.	.|.	.|.	.|.	.|.	.|.	.|.	.|.	.|.	.|.	.|.	.|.	.|.	.|.	.|.	.|.	.|.	.|.	42|40	.|.	.|.	.|.	44|42	.|.	.|.	42|40	.|.	42|40	.|.	.|.	.|.	.|.	.|.	.|.	.|.	.|.	.|.	.|.	42|38	.|.	42|40	.|.	.|.	.|.	.|.	.|.	.|.	.|.
chr11:50182786-50182816	.|.	.|.	.|.	.|.	.|.	.|.	.|.	.|.	.|.	.|.	.|.	.|.	.|.	.|.	30|28	.|.	.|.	.|.	.|.	.|.	.|.	.|.	.|.	.|.	.|.	.|.	.|.	.|.	.|.	.|.	.|.	.|.	.|.	.|.	.|.	.|.	.|.	.|.	.|.	.|.	.|.	.|.	.|.	.|.	.|.	30|26	.|.	.|.	.|.
chr11:5089635-5089669	.|.	.|.	.|.	.|.	.|.	.|.	.|.	.|.	.|.	.|.	.|.	.|.	.|.	.|.	.|.	.|.	26|28	.|.	.|.	28|28	.|.	.|.	.|.	.|.	.|.	.|.	28|28	34|32	.|.	.|.	.|.	.|.	.|.	.|.	26|28	.|.	28|28	34|30	.|.	.|.	.|.	.|.	.|.	.|.	32|32	.|.	.|.	.|.	.|.
chr11:5263804-5263828	20|20	20|20	20|20	20|16	20|20	20|20	20|20	20|20	20|20	20|20	20|20	20|20	20|20	20|20	20|20	20|20	20|20	.|.	.|.	20|20	20|20	20|20	20|20	20|20	20|20	20|20	20|20	20|20	20|20	.|.	.|.	20|20	20|20	20|20	20|20	20|20	20|20	20|20	20|20	20|20	20|20	20|20	20|20	20|20	20|20	20|20	20|20	20|20	20|20
chr11:55428314-55428340	.|.	.|.	.|.	.|.	.|.	.|.	.|.	.|.	.|.	.|.	.|.	.|.	.|.	.|.	.|.	.|.	.|.	.|.	.|.	.|.	.|.	.|.	.|.	.|.	.|.	.|.	.|.	.|.	.|.	.|.	.|.	.|.	.|.	.|.	.|.	.|.	.|.	.|.	.|.	.|.	.|.	.|.	.|.	.|.	.|.	.|.	.|.	.|.	.|.
chr11:55544213-55544249	.|.	.|.	.|.	.|.	.|.	.|.	.|.	.|.	.|.	.|.	.|.	.|.	.|.	.|.	.|.	.|.	.|.	.|.	.|.	.|.	.|.	.|.	.|.	.|.	.|.	38|40	.|.	.|.	.|.	26|28	.|.	.|.	.|.	38|40	.|.	.|.	.|.	.|.	.|.	.|.	.|.	.|.	.|.	.|.	.|.	.|.	.|.	.|.	.|.
chr11:5559123-5559157	.|.	.|.	.|.	.|.	.|.	.|.	.|.	30|36	.|.	.|.	.|.	.|.	.|.	.|.	.|.	.|.	.|.	.|.	.|.	.|.	.|.	.|.	.|.	30|30	30|30	34|36	.|.	.|.	28|30	.|.	36|38	.|.	34|36	.|.	.|.	.|.	.|.	.|.	30|36	.|.	.|.	.|.	.|.	.|.	.|.	.|.	.|.	36|36	.|.
chr11:55689788-55689813	25|25	.|.	.|.	.|.	.|.	.|.	.|.	.|.	.|.	.|.	25|25	25|25	.|.	.|.	.|.	.|.	.|.	.|.	.|.	.|.	.|.	.|.	.|.	.|.	.|.	.|.	.|.	25|25	.|.	25|25	.|.	.|.	.|.	.|.	25|25	.|.	.|.	.|.	.|.	.|.	.|.	.|.	.|.	.|.	.|.	.|.	.|.	.|.	.|.
chr11:56436229-56436254	.|.	25|25	.|.	.|.	.|.	.|.	.|.	.|.	.|.	.|.	.|.	.|.	.|.	.|.	.|.	.|.	.|.	.|.	.|.	25|25	.|.	.|.	.|.	.|.	.|.	.|.	.|.	.|.	.|.	.|.	.|.	.|.	.|.	.|.	.|.	.|.	.|.	.|.	.|.	.|.	.|.	.|.	.|.	.|.	.|.	.|.	.|.	.|.	.|.
chr11:56802666-56802690	.|.	.|.	.|.	.|.	.|.	.|.	.|.	.|.	.|.	.|.	20|22	.|.	26|28	.|.	20|22	.|.	.|.	.|.	.|.	.|.	.|.	.|.	.|.	.|.	.|.	.|.	.|.	.|.	.|.	.|.	.|.	.|.	.|.	.|.	.|.	.|.	.|.	.|.	.|.	.|.	26|28	.|.	.|.	.|.	.|.	.|.	.|.	.|.	.|.
chr11:58598745-58598791	.|.	.|.	.|.	.|.	.|.	.|.	.|.	.|.	.|.	.|.	.|.	.|.	.|.	.|.	.|.	.|.	.|.	.|.	.|.	.|.	.|.	.|.	.|.	.|.	.|.	.|.	.|.	.|.	.|.	.|.	.|.	.|.	.|.	.|.	46|50	.|.	.|.	.|.	.|.	.|.	.|.	.|.	.|.	.|.	.|.	.|.	.|.	.|.	.|.
chr11:58738404-58738434	.|.	.|.	.|.	.|.	28|34	30|34	32|34	.|.	34|34	.|.	34|34	28|34	.|.	.|.	.|.	.|.	32|32	30|32	.|.	28|32	28|32	32|32	32|32	28|32	30|32	28|32	30|26	28|32	28|34	.|.	28|32	.|.	28|32	26|28	28|32	28|32	30|32	32|32	28|32	30|32	28|32	30|28	32|32	32|32	30|28	28|32	30|32	28|32	28|32
chr11:5921605-5921633	.|.	.|.	.|.	.|.	.|.	28|28	.|.	.|.	.|.	.|.	24|24	.|.	.|.	.|.	.|.	.|.	.|.	.|.	.|.	.|.	.|.	.|.	.|.	.|.	26|26	.|.	.|.	.|.	.|.	.|.	.|.	.|.	.|.	.|.	.|.	.|.	24|24	.|.	.|.	.|.	.|.	.|.	.|.	.|.	.|.	.|.	.|.	.|.	.|.
chr11:59540447-59540485	.|.	.|.	.|.	.|.	.|.	.|.	.|.	30|30	30|34	30|34	.|.	.|.	.|.	34|34	.|.	.|.	.|.	.|.	.|.	30|30	.|.	.|.	.|.	.|.	34|34	.|.	32|34	.|.	.|.	.|.	30|34	.|.	30|34	34|34	28|30	.|.	.|.	.|.	28|30	.|.	30|32	.|.	.|.	.|.	.|.	.|.	.|.	34|34	.|.
chr11:60797098-60797136	.|.	.|.	32|32	.|.	.|.	.|.	.|.	.|.	.|.	.|.	.|.	.|.	.|.	.|.	.|.	.|.	.|.	.|.	.|.	.|.	.|.	.|.	.|.	.|.	.|.	.|.	32|32	.|.	.|.	.|.	.|.	.|.	.|.	.|.	.|.	.|.	.|.	.|.	.|.	.|.	.|.	.|.	.|.	32|32	.|.	.|.	.|.	.|.	.|.
chr11:60810151-60810183	.|.	.|.	.|.	28|30	.|.	.|.	28|30	.|.	.|.	.|.	.|.	.|.	.|.	.|.	.|.	.|.	.|.	.|.	.|.	26|28	.|.	.|.	.|.	.|.	.|.	.|.	26|28	.|.	.|.	.|.	28|32	.|.	28|28	.|.	.|.	.|.	28|30	.|.	.|.	.|.	28|28	28|28	.|.	.|.	26|28	26|28	.|.	28|30	.|.
chr11:61761994-61762018	.|.	.|.	.|.	24|24	.|.	.|.	.|.	.|.	24|24	.|.	.|.	.|.	.|.	.|.	24|24	.|.	.|.	.|.	24|24	.|.	.|.	.|.	.|.	.|.	.|.	24|24	.|.	.|.	.|.	.|.	.|.	.|.	.|.	.|.	.|.	.|.	.|.	.|.	.|.	.|.	.|.	.|.	.|.	.|.	.|.	.|.	.|.	.|.	.|.
chr11:6229411-6229439	.|.	.|.	.|.	.|.	.|.	.|.	.|.	.|.	.|.	.|.	.|.	.|.	.|.	.|.	.|.	.|.	.|.	.|.	.|.	.|.	.|.	.|.	.|.	.|.	.|.	.|.	.|.	.|.	.|.	.|.	.|.	.|.	26|26	.|.	.|.	.|.	28|26	.|.	.|.	.|.	.|.	.|.	.|.	.|.	.|.	.|.	.|.	.|.	.|.
chr11:6268865-6268890	.|.	.|.	.|.	.|.	.|.	.|.	.|.	.|.	.|.	29|29	.|.	.|.	.|.	.|.	.|.	.|.	.|.	.|.	.|.	.|.	.|.	.|.	.|.	.|.	.|.	.|.	.|.	.|.	.|.	.|.	.|.	.|.	.|.	.|.	.|.	.|.	.|.	.|.	.|.	.|.	.|.	.|.	.|.	.|.	.|.	.|.	.|.	.|.	.|.
chr11:63183013-63183047	.|.	.|.	.|.	.|.	.|.	.|.	.|.	.|.	.|.	.|.	.|.	.|.	.|.	.|.	.|.	.|.	.|.	.|.	.|.	.|.	.|.	.|.	.|.	.|.	.|.	.|.	.|.	.|.	.|.	.|.	.|.	.|.	.|.	.|.	.|.	.|.	.|.	.|.	.|.	.|.	.|.	30|30	.|.	.|.	.|.	.|.	.|.	.|.	.|.
chr11:63232843-63232885	.|.	.|.	.|.	.|.	.|.	.|.	.|.	.|.	.|.	.|.	.|.	.|.	.|.	.|.	.|.	.|.	.|.	.|.	.|.	.|.	.|.	.|.	.|.	.|.	.|.	.|.	32|36	.|.	.|.	.|.	.|.	.|.	.|.	.|.	.|.	32|36	.|.	.|.	.|.	.|.	.|.	.|.	.|.	28|28	.|.	.|.	.|.	.|.	.|.
chr11:63371175-63371225	.|.	.|.	.|.	.|.	.|.	42|46	.|.	.|.	.|.	.|.	.|.	.|.	.|.	32|32	.|.	.|.	.|.	.|.	.|.	42|42	42|42	.|.	.|.	.|.	.|.	.|.	.|.	.|.	.|.	.|.	.|.	.|.	.|.	.|.	.|.	.|.	.|.	.|.	.|.	.|.	.|.	.|.	.|.	.|.	.|.	.|.	.|.	.|.	.|.
chr11:64755181-64755211	.|.	.|.	.|.	.|.	.|.	.|.	.|.	.|.	.|.	.|.	.|.	.|.	.|.	.|.	.|.	.|.	.|.	.|.	.|.	.|.	.|.	.|.	.|.	.|.	.|.	.|.	.|.	.|.	.|.	.|.	.|.	.|.	.|.	.|.	.|.	.|.	.|.	.|.	.|.	.|.	.|.	.|.	.|.	.|.	.|.	.|.	.|.	.|.	.|.
chr11:6599848-6599894	.|.	.|.	.|.	.|.	.|.	.|.	.|.	36|42	.|.	.|.	.|.	.|.	.|.	.|.	.|.	.|.	.|.	.|.	.|.	42|46	.|.	.|.	.|.	.|.	.|.	.|.	.|.	.|.	.|.	.|.	44|48	.|.	.|.	.|.	.|.	.|.	.|.	.|.	44|48	.|.	40|42	.|.	.|.	.|.	40|42	.|.	.|.	.|.	.|.
chr11:68017189-68017213	.|.	.|.	.|.	.|.	.|.	.|.	24|24	.|.	.|.	.|.	.|.	.|.	.|.	.|.	.|.	.|.	.|.	.|.	.|.	24|24	.|.	.|.	.|.	24|24	.|.	.|.	.|.	24|24	.|.	24|24	.|.	.|.	.|.	.|.	.|.	.|.	.|.	.|.	.|.	.|.	.|.	.|.	.|.	.|.	.|.	.|.	.|.	.|.	.|.
chr11:68739842-68739872	24|24	.|.	30|30	30|30	30|30	.|.	.|.	30|30	.|.	.|.	.|.	.|.	.|.	30|30	.|.	.|.	.|.	.|.	.|.	.|.	.|.	30|30	.|.	24|24	.|.	.|.	30|24	.|.	.|.	.|.	30|24	.|.	.|.	24|24	24|24	24|24	.|.	.|.	.|.	30|30	30|30	24|24	.|.	.|.	.|.	.|.	.|.	24|24	30|30
chr11:70643937-70643975	.|.	.|.	.|.	.|.	.|.	.|.	.|.	.|.	.|.	38|42	.|.	.|.	.|.	.|.	.|.	.|.	.|.	.|.	.|.	.|.	.|.	.|.	.|.	42|44	.|.	.|.	.|.	.|.	.|.	.|.	.|.	.|.	.|.	.|.	.|.	.|.	.|.	.|.	.|.	.|.	40|44	.|.	.|.	.|.	.|.	38|34	.|.	.|.	.|.
chr11:74294444-74294468	.|.	.|.	.|.	.|.	.|.	.|.	.|.	.|.	.|.	.|.	.|.	.|.	.|.	.|.	.|.	.|.	.|.	.|.	.|.	24|24	.|.	.|.	.|.	.|.	.|.	.|.	.|.	.|.	.|.	.|.	.|.	.|.	.|.	24|24	.|.	.|.	.|.	.|.	.|.	.|.	.|.	.|.	.|.	24|24	.|.	.|.	.|.	.|.	.|.
chr11:74336916-74336950	34|32	28|30	34|32	.|.	34|32	.|.	34|30	28|30	34|30	34|32	30|30	34|32	34|30	.|.	30|30	34|30	.|.	34|32	.|.	34|30	34|30	28|28	34|30	34|32	28|30	30|32	34|30	.|.	34|32	28|30	34|30	34|30	34|30	34|30	28|30	34|30	34|30	34|30	34|30	34|30	34|30	34|30	34|30	30|30	34|32	28|30	34|30	30|32	34|32
chr11:74629344-74629370	.|.	.|.	.|.	.|.	.|.	.|.	.|.	.|.	.|.	.|.	.|.	26|24	26|24	.|.	.|.	26|24	.|.	.|.	.|.	.|.	.|.	.|.	.|.	.|.	26|24	.|.	.|.	.|.	.|.	.|.	.|.	.|.	.|.	.|.	.|.	.|.	.|.	26|24	26|26	.|.	.|.	.|.	.|.	.|.	26|28	.|.	.|.	.|.	.|.
chr11:7576016-7576046	.|.	.|.	35|35	.|.	.|.	.|.	.|.	.|.	.|.	.|.	.|.	.|.	.|.	.|.	.|.	.|.	.|.	.|.	.|.	.|.	.|.	.|.	.|.	.|.	.|.	.|.	.|.	35|35	.|.	.|.	.|.	.|.	.|.	.|.	30|30	35|35	.|.	.|.	.|.	.|.	.|.	.|.	.|.	.|.	.|.	.|.	.|.	.|.	.|.
chr11:76229902-76229926	.|.	.|.	.|.	.|.	.|.	.|.	22|22	.|.	.|.	.|.	.|.	22|22	.|.	.|.	22|22	.|.	.|.	.|.	.|.	.|.	.|.	.|.	.|.	.|.	.|.	.|.	.|.	.|.	24|22	.|.	.|.	.|.	.|.	.|.	24|24	.|.	.|.	.|.	.|.	.|.	.|.	.|.	.|.	.|.	22|22	24|22	.|.	.|.	.|.
chr11:76386839-76386863	24|24	24|24	.|.	.|.	.|.	.|.	27|27	.|.	.|.	.|.	.|.	.|.	24|24	.|.	.|.	.|.	.|.	.|.	.|.	.|.	.|.	.|.	.|.	24|24	24|24	.|.	.|.	24|24	27|27	.|.	.|.	.|.	.|.	.|.	.|.	.|.	.|.	.|.	.|.	.|.	.|.	24|24	.|.	24|24	.|.	.|.	.|.	.|.	.|.
chr11:76459809-76459835	24|24	24|24	.|.	.|.	.|.	.|.	.|.	.|.	.|.	.|.	.|.	.|.	.|.	.|.	.|.	.|.	.|.	.|.	.|.	26|26	.|.	.|.	.|.	.|.	.|.	.|.	.|.	.|.	.|.	.|.	.|.	.|.	22|24	.|.	.|.	.|.	24|24	.|.	.|.	.|.	.|.	.|.	.|.	.|.	.|.	.|.	.|.	.|.	.|.
chr11:77134447-77134487	.|.	.|.	.|.	.|.	.|.	.|.	.|.	.|.	.|.	.|.	.|.	.|.	.|.	.|.	.|.	.|.	.|.	.|.	.|.	36|36	.|.	.|.	.|.	.|.	.|.	.|.	.|.	32|32	.|.	.|.	.|.	.|.	.|.	.|.	.|.	.|.	.|.	34|36	.|.	.|.	.|.	.|.	.|.	.|.	.|.	.|.	.|.	.|.	.|.
chr11:77182237-77182262	.|.	.|.	25|25	.|.	.|.	.|.	.|.	.|.	.|.	.|.	.|.	.|.	.|.	.|.	.|.	25|25	.|.	.|.	.|.	25|25	.|.	25|25	25|25	.|.	25|25	.|.	25|25	.|.	25|25	.|.	25|25	.|.	25|25	.|.	.|.	.|.	25|25	.|.	25|25	.|.	.|.	25|25	25|25	.|.	.|.	25|25	.|.	.|.	.|.
chr11:77372482-77372508	.|.	.|.	.|.	.|.	.|.	.|.	.|.	.|.	.|.	.|.	.|.	.|.	.|.	.|.	28|32	.|.	.|.	.|.	.|.	26|28	.|.	.|.	.|.	.|.	.|.	.|.	.|.	.|.	.|.	.|.	28|28	.|.	26|28	.|.	.|.	.|.	.|.	.|.	.|.	.|.	26|28	.|.	.|.	.|.	.|.	.|.	.|.	.|.	.|.
chr11:78003049-78003075	.|.	.|.	26|26	.|.	.|.	.|.	.|.	.|.	.|.	.|.	.|.	.|.	.|.	.|.	24|26	.|.	.|.	.|.	.|.	.|.	22|20	.|.	.|.	.|.	.|.	20|22	.|.	22|26	22|22	.|.	22|22	.|.	.|.	.|.	.|.	.|.	26|26	.|.	.|.	.|.	.|.	22|26	.|.	22|22	.|.	22|22	.|.	22|24	.|.
chr11:78112551-78112593	.|.	.|.	.|.	.|.	.|.	.|.	.|.	.|.	.|.	.|.	.|.	.|.	.|.	.|.	.|.	.|.	.|.	.|.	.|.	.|.	.|.	.|.	.|.	36|38	.|.	42|40	.|.	.|.	42|40	.|.	.|.	.|.	.|.	.|.	.|.	.|.	.|.	.|.	.|.	.|.	.|.	.|.	.|.	.|.	.|.	.|.	.|.	.|.	.|.
chr11:78216315-78216369	.|.	.|.	.|.	.|.	.|.	.|.	.|.	.|.	.|.	.|.	.|.	.|.	.|.	.|.	.|.	.|.	.|.	.|.	.|.	.|.	.|.	.|.	.|.	.|.	.|.	.|.	.|.	.|.	.|.	.|.	.|.	.|.	.|.	.|.	.|.	.|.	.|.	.|.	.|.	.|.	.|.	.|.	.|.	.|.	.|.	.|.	.|.	.|.	.|.
chr11:78307852-78307890	.|.	.|.	.|.	.|.	.|.	.|.	.|.	.|.	.|.	.|.	.|.	.|.	.|.	.|.	.|.	.|.	.|.	.|.	.|.	.|.	.|.	.|.	.|.	.|.	.|.	.|.	.|.	.|.	.|.	.|.	.|.	.|.	.|.	.|.	.|.	.|.	.|.	.|.	.|.	.|.	36|40	.|.	.|.	.|.	.|.	.|.	.|.	.|.	.|.
chr11:78410543-78410567	.|.	.|.	.|.	.|.	.|.	.|.	.|.	.|.	.|.	.|.	.|.	.|.	.|.	.|.	.|.	.|.	.|.	.|.	.|.	.|.	.|.	.|.	.|.	.|.	.|.	.|.	.|.	.|.	.|.	.|.	.|.	.|.	.|.	.|.	.|.	.|.	.|.	.|.	.|.	.|.	.|.	.|.	.|.	.|.	.|.	.|.	.|.	.|.	.|.
chr11:80352946-80352982	.|.	.|.	.|.	.|.	.|.	.|.	.|.	.|.	.|.	.|.	.|.	.|.	.|.	36|39	.|.	.|.	.|.	.|.	.|.	.|.	.|.	.|.	.|.	.|.	.|.	.|.	.|.	39|39	.|.	.|.	.|.	.|.	.|.	.|.	.|.	.|.	.|.	.|.	.|.	.|.	.|.	.|.	.|.	.|.	36|39	.|.	.|.	.|.	.|.
chr11:80718148-80718182	.|.	.|.	.|.	.|.	.|.	.|.	.|.	.|.	.|.	.|.	.|.	.|.	.|.	.|.	.|.	.|.	.|.	.|.	34|32	.|.	.|.	.|.	.|.	38|38	.|.	.|.	.|.	.|.	38|38	.|.	.|.	.|.	.|.	.|.	.|.	.|.	.|.	.|.	.|.	.|.	.|.	.|.	.|.	.|.	34|34	.|.	.|.	.|.	.|.
chr11:80923418-80923450	.|.	.|.	.|.	.|.	.|.	.|.	.|.	.|.	.|.	.|.	.|.	.|.	.|.	.|.	.|.	.|.	24|28	.|.	.|.	.|.	.|.	.|.	24|24	.|.	24|28	.|.	.|.	32|32	24|28	.|.	.|.	32|32	.|.	.|.	24|28	.|.	.|.	.|.	.|.	.|.	.|.	.|.	.|.	.|.	.|.	.|.	.|.	.|.	.|.
chr11:81243170-81243214	.|.	.|.	.|.	.|.	.|.	.|.	.|.	.|.	.|.	.|.	28|28	.|.	.|.	.|.	.|.	.|.	.|.	.|.	.|.	.|.	.|.	.|.	.|.	.|.	.|.	.|.	.|.	.|.	42|48	.|.	.|.	.|.	.|.	.|.	.|.	.|.	.|.	.|.	.|.	.|.	.|.	.|.	.|.	.|.	.|.	.|.	.|.	.|.	.|.
chr11:81473178-81473210	26|26	.|.	.|.	.|.	.|.	.|.	.|.	.|.	.|.	.|.	.|.	.|.	.|.	.|.	.|.	.|.	.|.	.|.	.|.	30|30	.|.	.|.	.|.	.|.	.|.	.|.	.|.	.|.	.|.	.|.	.|.	.|.	.|.	.|.	.|.	28|30	.|.	.|.	.|.	.|.	28|30	.|.	26|26	.|.	.|.	.|.	.|.	.|.	.|.
chr11:81808044-81808082	.|.	.|.	.|.	.|.	.|.	.|.	.|.	.|.	.|.	.|.	.|.	.|.	42|44	.|.	.|.	42|44	.|.	.|.	.|.	.|.	.|.	.|.	.|.	.|.	.|.	.|.	.|.	.|.	36|40	.|.	.|.	.|.	.|.	42|44	.|.	.|.	.|.	42|44	.|.	.|.	38|44	.|.	42|44	.|.	.|.	.|.	.|.	.|.	.|.
chr11:82194359-82194401	.|.	.|.	.|.	.|.	.|.	.|.	.|.	.|.	.|.	.|.	.|.	.|.	.|.	.|.	.|.	38|38	.|.	.|.	.|.	.|.	.|.	.|.	40|44	.|.	.|.	.|.	.|.	.|.	.|.	.|.	.|.	.|.	.|.	.|.	.|.	.|.	.|.	.|.	.|.	.|.	.|.	.|.	.|.	.|.	.|.	.|.	44|46	.|.	.|.
chr11:82207232-82207256	24|24	.|.	.|.	.|.	24|24	.|.	24|24	.|.	.|.	.|.	.|.	24|24	.|.	.|.	.|.	.|.	.|.	.|.	.|.	.|.	.|.	.|.	.|.	24|24	.|.	.|.	.|.	.|.	24|24	.|.	.|.	.|.	.|.	.|.	.|.	.|.	.|.	24|24	.|.	.|.	.|.	.|.	.|.	.|.	.|.	.|.	.|.	.|.	.|.
chr11:83277755-83277797	.|.	.|.	.|.	.|.	.|.	.|.	.|.	.|.	.|.	.|.	.|.	.|.	.|.	.|.	.|.	.|.	.|.	.|.	.|.	.|.	.|.	.|.	.|.	.|.	.|.	.|.	.|.	.|.	.|.	.|.	.|.	.|.	.|.	.|.	.|.	.|.	.|.	.|.	.|.	.|.	.|.	.|.	.|.	.|.	.|.	.|.	.|.	.|.	.|.
chr11:83316050-83316080	.|.	.|.	.|.	.|.	.|.	.|.	.|.	.|.	.|.	.|.	.|.	.|.	.|.	.|.	.|.	.|.	.|.	.|.	.|.	.|.	.|.	.|.	.|.	.|.	24|26	.|.	.|.	.|.	.|.	.|.	.|.	.|.	.|.	.|.	.|.	.|.	.|.	.|.	.|.	.|.	.|.	.|.	.|.	.|.	.|.	.|.	.|.	.|.	.|.
chr11:84617425-84617457	.|.	34|34	34|34	32|34	42|44	.|.	.|.	.|.	.|.	42|42	.|.	34|34	.|.	32|34	.|.	34|34	.|.	.|.	.|.	.|.	.|.	.|.	.|.	42|44	44|46	42|44	.|.	.|.	.|.	.|.	32|34	.|.	34|34	.|.	44|44	44|46	46|44	34|34	32|34	.|.	34|44	.|.	44|46	.|.	.|.	.|.	34|34	.|.	42|44
chr11:84928362-84928390	28|30	.|.	.|.	.|.	.|.	.|.	38|40	.|.	.|.	.|.	.|.	.|.	.|.	28|30	28|30	.|.	38|40	.|.	.|.	30|38	.|.	.|.	30|38	28|30	.|.	.|.	40|42	.|.	38|40	28|30	38|40	.|.	30|40	.|.	.|.	.|.	28|30	.|.	30|30	.|.	30|38	28|30	30|38	38|40	.|.	.|.	.|.	.|.	.|.
chr11:85157837-85157869	52|54	.|.	.|.	.|.	50|52	.|.	32|32	.|.	.|.	.|.	.|.	.|.	.|.	.|.	.|.	32|32	.|.	.|.	.|.	.|.	.|.	50|52	.|.	.|.	.|.	.|.	50|52	.|.	50|52	.|.	32|52	.|.	.|.	.|.	50|52	.|.	.|.	.|.	50|52	.|.	32|32	32|32	.|.	.|.	32|32	.|.	.|.	.|.	.|.
chr11:85427738-85427774	.|.	.|.	.|.	.|.	.|.	58|60	.|.	56|60	54|56	.|.	.|.	42|44	.|.	.|.	44|62	.|.	.|.	.|.	.|.	44|46	52|54	.|.	56|46	44|46	.|.	.|.	58|46	56|58	44|46	.|.	60|46	.|.	58|46	.|.	44|46	.|.	.|.	.|.	.|.	.|.	.|.	56|58	58|46	.|.	.|.	54|58	.|.	.|.	46|48
chr11:85679990-85680040	.|.	.|.	.|.	.|.	.|.	.|.	24|28	.|.	.|.	.|.	.|.	.|.	.|.	.|.	.|.	.|.	.|.	.|.	.|.	.|.	.|.	26|28	16|16	.|.	.|.	.|.	.|.	.|.	.|.	.|.	.|.	.|.	.|.	.|.	.|.	.|.	.|.	.|.	.|.	.|.	.|.	.|.	.|.	.|.	.|.	.|.	.|.	.|.	.|.
chr11:85968227-85968259	.|.	32|34	.|.	.|.	32|34	.|.	32|34	32|34	32|34	32|34	.|.	.|.	.|.	.|.	.|.	.|.	.|.	.|.	.|.	32|34	.|.	.|.	.|.	.|.	.|.	32|34	32|34	32|34	.|.	.|.	32|34	.|.	32|34	.|.	32|34	.|.	.|.	.|.	.|.	.|.	32|34	.|.	.|.	.|.	.|.	.|.	32|34	.|.	.|.
chr11:86391307-86391345	.|.	.|.	.|.	.|.	.|.	.|.	.|.	.|.	.|.	.|.	.|.	.|.	.|.	.|.	.|.	.|.	.|.	.|.	.|.	.|.	.|.	.|.	.|.	.|.	.|.	.|.	.|.	.|.	.|.	.|.	.|.	.|.	.|.	.|.	.|.	.|.	.|.	34|34	.|.	.|.	.|.	.|.	.|.	.|.	.|.	.|.	.|.	.|.	.|.
chr11:86636337-86636373	.|.	.|.	.|.	.|.	.|.	.|.	.|.	.|.	.|.	.|.	.|.	.|.	.|.	.|.	.|.	.|.	.|.	.|.	.|.	.|.	32|34	.|.	36|34	.|.	.|.	.|.	.|.	.|.	36|34	.|.	36|34	.|.	34|34	.|.	.|.	34|34	36|32	.|.	36|34	.|.	34|34	.|.	.|.	34|34	38|38	.|.	.|.	.|.	36|34
chr11:86860074-86860106	40|44	.|.	.|.	20|20	.|.	.|.	.|.	.|.	.|.	.|.	.|.	.|.	.|.	.|.	.|.	.|.	.|.	.|.	.|.	.|.	.|.	44|46	.|.	.|.	.|.	.|.	.|.	.|.	22|24	.|.	.|.	.|.	.|.	.|.	.|.	.|.	.|.	.|.	44|44	.|.	.|.	.|.	.|.	.|.	.|.	.|.	.|.	.|.	.|.
chr11:87103212-87103244	.|.	.|.	.|.	.|.	.|.	.|.	.|.	.|.	.|.	.|.	.|.	.|.	.|.	.|.	.|.	.|.	.|.	.|.	.|.	.|.	.|.	.|.	.|.	.|.	.|.	.|.	.|.	.|.	.|.	.|.	.|.	.|.	.|.	.|.	.|.	.|.	.|.	.|.	.|.	.|.	.|.	.|.	.|.	.|.	.|.	.|.	.|.	.|.	.|.
chr11:87137462-87137492	.|.	.|.	30|32	.|.	.|.	.|.	.|.	32|34	.|.	.|.	.|.	.|.	.|.	.|.	.|.	.|.	.|.	.|.	.|.	32|34	.|.	.|.	.|.	.|.	.|.	.|.	.|.	30|32	.|.	.|.	.|.	.|.	.|.	.|.	.|.	.|.	30|34	.|.	.|.	.|.	.|.	28|32	.|.	.|.	.|.	.|.	.|.	.|.	.|.
chr11:87441029-87441067	.|.	.|.	.|.	.|.	.|.	.|.	.|.	.|.	.|.	.|.	.|.	.|.	.|.	.|.	.|.	.|.	.|.	.|.	.|.	.|.	.|.	.|.	.|.	.|.	.|.	.|.	.|.	.|.	.|.	.|.	.|.	.|.	.|.	.|.	.|.	.|.	.|.	.|.	.|.	.|.	.|.	.|.	.|.	.|.	.|.	.|.	.|.	.|.	.|.
chr11:88042982-88043016	32|34	.|.	.|.	.|.	.|.	.|.	.|.	.|.	18|18	.|.	.|.	.|.	.|.	.|.	.|.	.|.	.|.	.|.	.|.	.|.	.|.	.|.	.|.	.|.	32|34	.|.	.|.	.|.	.|.	.|.	.|.	.|.	.|.	.|.	.|.	.|.	.|.	.|.	.|.	.|.	.|.	.|.	.|.	.|.	20|20	.|.	.|.	.|.	.|.
chr11:88250296-88250330	34|32	36|36	.|.	.|.	.|.	.|.	.|.	.|.	.|.	.|.	.|.	.|.	.|.	.|.	.|.	.|.	.|.	.|.	.|.	34|34	.|.	.|.	.|.	.|.	.|.	34|34	34|36	.|.	.|.	.|.	.|.	34|36	34|34	.|.	.|.	.|.	.|.	.|.	.|.	.|.	.|.	.|.	.|.	.|.	.|.	.|.	.|.	.|.	.|.
chr11:88398330-88398358	.|.	.|.	.|.	.|.	.|.	.|.	.|.	.|.	.|.	.|.	.|.	.|.	.|.	.|.	.|.	.|.	.|.	.|.	.|.	36|38	.|.	.|.	44|46	.|.	42|44	.|.	.|.	.|.	.|.	.|.	.|.	.|.	.|.	.|.	.|.	38|38	.|.	.|.	.|.	42|46	.|.	.|.	36|38	.|.	.|.	.|.	.|.	36|38	.|.
chr11:88642713-88642739	.|.	.|.	.|.	.|.	.|.	.|.	.|.	.|.	.|.	.|.	.|.	.|.	.|.	.|.	.|.	.|.	.|.	.|.	.|.	.|.	.|.	.|.	.|.	.|.	.|.	.|.	.|.	.|.	.|.	.|.	.|.	.|.	26|26	.|.	26|26	26|26	.|.	.|.	.|.	.|.	.|.	.|.	.|.	.|.	.|.	.|.	.|.	.|.	.|.
chr11:88683519-88683549	.|.	30|30	.|.	.|.	.|.	.|.	.|.	30|38	.|.	.|.	.|.	.|.	.|.	.|.	.|.	.|.	.|.	.|.	.|.	30|30	.|.	.|.	30|30	30|30	.|.	.|.	30|30	.|.	.|.	.|.	.|.	.|.	30|30	.|.	.|.	30|30	30|30	30|30	30|30	.|.	30|30	.|.	30|30	.|.	.|.	.|.	30|30	.|.	30|30
chr11:88869585-88869615	.|.	.|.	.|.	.|.	.|.	.|.	.|.	.|.	.|.	.|.	.|.	.|.	.|.	.|.	.|.	.|.	.|.	.|.	.|.	.|.	.|.	.|.	.|.	.|.	.|.	.|.	.|.	.|.	.|.	.|.	.|.	.|.	.|.	.|.	.|.	.|.	.|.	.|.	.|.	.|.	.|.	.|.	.|.	.|.	.|.	.|.	.|.	.|.	.|.
chr11:89138248-89138282	.|.	.|.	.|.	.|.	.|.	.|.	.|.	.|.	.|.	.|.	.|.	.|.	.|.	.|.	.|.	.|.	.|.	.|.	.|.	.|.	.|.	.|.	.|.	.|.	.|.	.|.	.|.	.|.	.|.	.|.	.|.	.|.	.|.	.|.	.|.	.|.	.|.	.|.	.|.	.|.	.|.	.|.	.|.	.|.	.|.	.|.	.|.	52|52	.|.
chr11:90377443-90377485	.|.	.|.	.|.	.|.	.|.	.|.	.|.	.|.	.|.	.|.	.|.	.|.	.|.	.|.	.|.	.|.	.|.	.|.	.|.	.|.	.|.	.|.	.|.	.|.	.|.	.|.	38|36	.|.	.|.	.|.	.|.	.|.	.|.	.|.	.|.	.|.	.|.	.|.	.|.	.|.	.|.	.|.	.|.	.|.	.|.	.|.	.|.	.|.	.|.
chr11:90459530-90459572	.|.	.|.	.|.	.|.	.|.	.|.	.|.	.|.	.|.	.|.	.|.	.|.	.|.	.|.	.|.	.|.	.|.	.|.	.|.	.|.	26|28	.|.	.|.	.|.	.|.	28|28	.|.	.|.	.|.	.|.	.|.	.|.	.|.	.|.	.|.	.|.	.|.	.|.	.|.	.|.	.|.	.|.	.|.	.|.	28|28	.|.	.|.	.|.	.|.
chr11:90786357-90786405	.|.	.|.	.|.	.|.	.|.	.|.	.|.	.|.	.|.	.|.	.|.	.|.	.|.	.|.	.|.	.|.	.|.	.|.	.|.	.|.	36|38	.|.	.|.	38|38	.|.	.|.	.|.	.|.	36|38	.|.	.|.	.|.	.|.	.|.	.|.	.|.	.|.	.|.	36|38	.|.	.|.	.|.	.|.	.|.	30|30	.|.	.|.	.|.	.|.
chr11:9130167-9130205	.|.	.|.	.|.	.|.	.|.	.|.	.|.	.|.	.|.	.|.	.|.	.|.	.|.	.|.	.|.	.|.	.|.	34|34	.|.	.|.	34|34	.|.	.|.	.|.	32|32	.|.	34|34	.|.	.|.	.|.	.|.	.|.	.|.	.|.	.|.	.|.	.|.	.|.	.|.	.|.	.|.	34|34	.|.	.|.	30|32	.|.	.|.	34|34	.|.
chr11:91376091-91376131	.|.	.|.	46|48	.|.	.|.	34|34	46|48	34|34	.|.	46|48	.|.	46|48	.|.	.|.	.|.	34|34	.|.	.|.	.|.	46|48	.|.	36|36	.|.	.|.	46|48	.|.	.|.	.|.	38|38	.|.	.|.	.|.	.|.	.|.	44|48	.|.	36|36	.|.	30|36	32|36	32|36	.|.	.|.	.|.	.|.	36|24	48|48	.|.	.|.
chr11:91618027-91618055	.|.	.|.	.|.	.|.	.|.	.|.	.|.	.|.	.|.	.|.	.|.	.|.	.|.	.|.	.|.	.|.	.|.	.|.	.|.	.|.	.|.	.|.	38|40	.|.	.|.	.|.	.|.	.|.	.|.	.|.	32|32	.|.	.|.	.|.	.|.	.|.	.|.	.|.	.|.	.|.	.|.	.|.	.|.	.|.	.|.	.|.	.|.	38|40	.|.
chr11:91643553-91643587	.|.	.|.	.|.	.|.	.|.	.|.	.|.	.|.	.|.	.|.	.|.	.|.	.|.	.|.	.|.	.|.	.|.	.|.	.|.	28|30	.|.	.|.	.|.	.|.	.|.	28|30	.|.	.|.	.|.	.|.	.|.	.|.	26|28	.|.	.|.	.|.	.|.	.|.	.|.	.|.	.|.	.|.	.|.	.|.	.|.	.|.	.|.	.|.	.|.
chr11:91733786-91733813	.|.	.|.	.|.	.|.	.|.	.|.	.|.	.|.	.|.	.|.	.|.	.|.	24|24	24|24	.|.	.|.	.|.	.|.	.|.	.|.	.|.	.|.	.|.	.|.	.|.	.|.	.|.	.|.	.|.	.|.	.|.	.|.	.|.	.|.	.|.	.|.	.|.	.|.	.|.	.|.	.|.	.|.	.|.	.|.	.|.	.|.	.|.	.|.	.|.
chr11:92064131-92064169	.|.	.|.	.|.	.|.	.|.	.|.	.|.	.|.	.|.	.|.	.|.	.|.	.|.	.|.	.|.	.|.	.|.	.|.	.|.	.|.	.|.	.|.	26|28	28|30	28|30	.|.	.|.	.|.	.|.	.|.	.|.	28|30	.|.	.|.	.|.	.|.	.|.	.|.	.|.	.|.	28|28	.|.	.|.	.|.	.|.	.|.	.|.	.|.	.|.
chr11:92284580-92284610	.|.	.|.	.|.	.|.	.|.	.|.	.|.	32|34	32|32	.|.	.|.	.|.	.|.	.|.	.|.	.|.	.|.	.|.	.|.	31|34	.|.	.|.	.|.	.|.	31|31	32|34	.|.	.|.	.|.	.|.	36|33	.|.	31|32	.|.	.|.	31|31	.|.	.|.	29|31	.|.	31|31	29|34	.|.	.|.	.|.	32|34	34|34	31|31	.|.
chr11:92828987-92829021	.|.	.|.	.|.	.|.	.|.	.|.	.|.	.|.	.|.	.|.	.|.	.|.	.|.	.|.	.|.	.|.	.|.	.|.	.|.	.|.	26|26	.|.	.|.	.|.	.|.	.|.	.|.	.|.	.|.	.|.	.|.	.|.	.|.	.|.	.|.	.|.	26|26	.|.	.|.	.|.	32|32	.|.	.|.	.|.	.|.	30|32	.|.	.|.	.|.
chr11:93007702-93007736	.|.	.|.	.|.	.|.	.|.	.|.	.|.	.|.	26|28	.|.	.|.	26|26	.|.	.|.	.|.	.|.	.|.	.|.	.|.	.|.	.|.	.|.	.|.	32|36	.|.	.|.	.|.	.|.	.|.	.|.	.|.	.|.	.|.	.|.	.|.	.|.	.|.	.|.	.|.	26|26	.|.	.|.	24|26	.|.	.|.	.|.	.|.	34|32	.|.
chr11:93957447-93957475	.|.	36|36	.|.	.|.	.|.	.|.	.|.	.|.	34|36	42|44	.|.	36|36	30|36	.|.	.|.	.|.	.|.	.|.	.|.	.|.	.|.	.|.	.|.	.|.	.|.	.|.	.|.	.|.	.|.	.|.	38|38	.|.	38|44	.|.	.|.	28|38	44|44	36|36	40|44	.|.	.|.	.|.	.|.	38|38	.|.	36|38	44|44	38|44	42|44
chr11:9486145-9486169	.|.	.|.	.|.	.|.	.|.	.|.	.|.	.|.	.|.	24|24	.|.	.|.	.|.	.|.	.|.	.|.	.|.	.|.	.|.	.|.	.|.	.|.	.|.	24|24	.|.	.|.	24|24	.|.	.|.	.|.	24|24	.|.	.|.	.|.	.|.	.|.	.|.	.|.	.|.	.|.	.|.	.|.	24|24	.|.	.|.	.|.	.|.	.|.	.|.
chr11:94939529-94939571	.|.	.|.	.|.	.|.	.|.	.|.	.|.	.|.	.|.	.|.	.|.	.|.	.|.	.|.	.|.	.|.	.|.	30|32	.|.	.|.	.|.	.|.	.|.	.|.	.|.	.|.	.|.	.|.	34|36	.|.	.|.	34|36	.|.	.|.	.|.	.|.	34|36	.|.	.|.	.|.	32|34	.|.	.|.	.|.	.|.	.|.	32|36	.|.	.|.
chr11:94995300-94995346	.|.	42|44	.|.	.|.	.|.	.|.	.|.	.|.	.|.	.|.	.|.	46|44	.|.	.|.	.|.	.|.	.|.	.|.	.|.	40|42	.|.	.|.	40|42	.|.	.|.	.|.	.|.	.|.	.|.	.|.	.|.	.|.	.|.	.|.	.|.	.|.	.|.	.|.	.|.	.|.	.|.	42|44	.|.	.|.	46|44	46|40	.|.	.|.	46|44
chr11:95357894-95357934	.|.	.|.	.|.	.|.	.|.	.|.	.|.	.|.	.|.	26|28	.|.	26|28	.|.	.|.	.|.	.|.	.|.	.|.	.|.	.|.	.|.	.|.	.|.	.|.	.|.	.|.	.|.	28|28	.|.	.|.	.|.	.|.	.|.	.|.	.|.	.|.	.|.	.|.	.|.	.|.	.|.	.|.	.|.	.|.	.|.	.|.	.|.	.|.	.|.
chr11:95729232-95729260	.|.	.|.	.|.	32|32	.|.	.|.	.|.	32|32	32|32	.|.	.|.	.|.	.|.	.|.	.|.	.|.	.|.	.|.	.|.	.|.	.|.	.|.	.|.	.|.	32|32	32|32	32|32	.|.	.|.	.|.	.|.	.|.	.|.	.|.	.|.	32|32	32|32	.|.	.|.	32|32	32|32	.|.	.|.	.|.	32|32	32|32	.|.	.|.	.|.
chr11:95809596-95809638	.|.	28|26	.|.	.|.	.|.	.|.	.|.	.|.	.|.	28|26	.|.	.|.	.|.	.|.	28|26	.|.	.|.	.|.	.|.	.|.	.|.	.|.	32|34	.|.	28|26	.|.	.|.	.|.	.|.	.|.	.|.	.|.	28|36	.|.	.|.	.|.	36|36	32|36	.|.	.|.	28|36	.|.	.|.	28|26	.|.	34|36	.|.	.|.	.|.
chr11:95945272-95945314	.|.	.|.	.|.	.|.	.|.	38|36	.|.	.|.	.|.	38|36	.|.	.|.	38|36	.|.	.|.	.|.	.|.	.|.	.|.	36|36	38|38	.|.	36|34	36|34	36|34	.|.	.|.	38|36	.|.	.|.	36|34	.|.	36|34	.|.	.|.	38|36	.|.	38|36	38|36	.|.	36|36	36|34	.|.	.|.	.|.	36|36	.|.	.|.	36|34
chr11:96028845-96028875	.|.	.|.	.|.	.|.	.|.	.|.	.|.	.|.	.|.	.|.	.|.	.|.	.|.	.|.	.|.	.|.	.|.	.|.	24|24	.|.	24|24	.|.	.|.	.|.	.|.	.|.	24|24	.|.	.|.	.|.	.|.	.|.	.|.	.|.	.|.	.|.	.|.	.|.	.|.	.|.	.|.	.|.	.|.	.|.	.|.	26|28	.|.	26|28	.|.
chr11:96791106-96791144	.|.	.|.	.|.	.|.	.|.	.|.	.|.	.|.	.|.	.|.	.|.	.|.	.|.	.|.	.|.	.|.	.|.	.|.	.|.	.|.	.|.	.|.	34|36	.|.	.|.	.|.	.|.	.|.	.|.	.|.	.|.	.|.	.|.	.|.	.|.	.|.	.|.	.|.	.|.	.|.	.|.	.|.	.|.	.|.	.|.	.|.	.|.	.|.	.|.
chr11:97128524-97128568	.|.	.|.	.|.	.|.	.|.	.|.	.|.	.|.	.|.	.|.	.|.	.|.	.|.	.|.	.|.	.|.	.|.	.|.	.|.	.|.	.|.	.|.	.|.	.|.	.|.	.|.	.|.	.|.	.|.	.|.	.|.	.|.	.|.	.|.	.|.	.|.	.|.	.|.	.|.	.|.	.|.	.|.	.|.	32|34	.|.	.|.	.|.	.|.	.|.
chr11:97290190-97290232	26|26	.|.	.|.	.|.	.|.	.|.	.|.	.|.	.|.	.|.	.|.	.|.	.|.	.|.	.|.	.|.	.|.	.|.	.|.	.|.	.|.	.|.	.|.	.|.	28|28	.|.	30|30	.|.	.|.	.|.	.|.	.|.	.|.	.|.	.|.	28|28	.|.	.|.	.|.	.|.	.|.	.|.	.|.	28|28	.|.	.|.	28|28	30|30	.|.
chr11:97575309-97575333	.|.	.|.	.|.	.|.	.|.	.|.	.|.	.|.	.|.	24|24	.|.	.|.	.|.	.|.	.|.	.|.	.|.	24|24	.|.	.|.	.|.	.|.	24|24	.|.	.|.	24|24	.|.	.|.	.|.	.|.	.|.	.|.	22|22	24|24	.|.	.|.	24|24	22|22	.|.	.|.	.|.	.|.	.|.	.|.	22|24	22|24	.|.	.|.	22|22
chr11:97673739-97673785	.|.	.|.	.|.	.|.	.|.	.|.	.|.	.|.	.|.	.|.	.|.	34|34	34|34	.|.	.|.	.|.	.|.	.|.	.|.	.|.	.|.	.|.	34|34	.|.	34|34	.|.	.|.	.|.	.|.	.|.	34|34	.|.	.|.	.|.	.|.	.|.	.|.	.|.	.|.	.|.	.|.	32|32	.|.	.|.	32|32	32|32	32|32	.|.	.|.
chr11:97713085-97713110	.|.	.|.	25|25	.|.	.|.	.|.	.|.	.|.	.|.	.|.	.|.	.|.	.|.	.|.	.|.	.|.	.|.	.|.	.|.	.|.	.|.	25|25	.|.	.|.	.|.	25|25	.|.	25|25	.|.	.|.	.|.	.|.	.|.	.|.	.|.	.|.	25|25	.|.	.|.	.|.	.|.	.|.	.|.	.|.	.|.	.|.	.|.	.|.	.|.
chr11:98085590-98085632	.|.	.|.	.|.	.|.	.|.	.|.	.|.	.|.	.|.	.|.	.|.	.|.	.|.	.|.	.|.	.|.	.|.	.|.	.|.	.|.	.|.	.|.	.|.	.|.	.|.	.|.	.|.	.|.	.|.	.|.	32|30	.|.	.|.	.|.	.|.	.|.	.|.	.|.	.|.	.|.	.|.	.|.	28|26	.|.	.|.	.|.	28|28	28|26	.|.
chr11:98424882-98424914	.|.	.|.	.|.	.|.	.|.	26|28	26|28	.|.	.|.	.|.	.|.	.|.	.|.	.|.	.|.	.|.	.|.	.|.	.|.	.|.	.|.	.|.	38|42	.|.	.|.	.|.	.|.	.|.	.|.	.|.	.|.	.|.	.|.	.|.	.|.	40|44	.|.	.|.	38|42	.|.	.|.	.|.	.|.	.|.	.|.	.|.	.|.	.|.	.|.
chr11:99204703-99204729	22|22	22|22	.|.	26|26	26|26	.|.	.|.	22|26	20|22	.|.	.|.	.|.	26|26	.|.	.|.	.|.	.|.	.|.	.|.	20|24	.|.	24|24	.|.	22|22	.|.	22|24	.|.	.|.	.|.	.|.	.|.	22|22	26|26	.|.	.|.	22|22	26|26	.|.	22|22	.|.	26|26	.|.	26|26	22|22	22|22	22|22	26|26	.|.	.|.
chr12:100060635-100060673	.|.	.|.	.|.	.|.	.|.	.|.	.|.	.|.	.|.	.|.	.|.	.|.	.|.	.|.	.|.	30|32	.|.	.|.	.|.	.|.	.|.	.|.	.|.	.|.	38|38	.|.	.|.	.|.	.|.	.|.	.|.	.|.	.|.	38|36	.|.	.|.	38|34	.|.	.|.	.|.	.|.	.|.	.|.	.|.	.|.	.|.	.|.	.|.	.|.
chr12:100282747-100282777	.|.	.|.	.|.	.|.	.|.	.|.	28|28	28|28	32|34	.|.	.|.	.|.	.|.	.|.	.|.	.|.	.|.	.|.	.|.	34|34	.|.	.|.	.|.	.|.	.|.	.|.	.|.	28|28	.|.	.|.	32|34	.|.	.|.	.|.	.|.	.|.	.|.	.|.	.|.	.|.	30|34	.|.	.|.	.|.	.|.	.|.	.|.	.|.	.|.
chr12:100284348-100284402	42|44	40|42	.|.	.|.	40|42	.|.	.|.	40|42	.|.	.|.	40|42	40|42	.|.	.|.	40|42	.|.	.|.	.|.	.|.	40|42	.|.	.|.	40|42	42|42	40|42	.|.	40|42	42|42	42|42	.|.	.|.	.|.	42|44	.|.	.|.	.|.	.|.	.|.	.|.	38|42	40|42	.|.	42|44	.|.	40|44	.|.	36|40	.|.	.|.
chr12:100478156-100478204	.|.	.|.	.|.	.|.	.|.	.|.	.|.	.|.	.|.	.|.	.|.	.|.	.|.	.|.	.|.	.|.	.|.	.|.	.|.	.|.	.|.	.|.	.|.	.|.	.|.	.|.	.|.	.|.	.|.	.|.	.|.	.|.	.|.	.|.	.|.	.|.	.|.	.|.	.|.	.|.	.|.	.|.	.|.	.|.	.|.	.|.	.|.	.|.	.|.
chr12:100502937-100502991	.|.	24|30	.|.	38|42	42|30	.|.	.|.	.|.	40|42	40|42	.|.	28|30	.|.	.|.	.|.	.|.	28|30	.|.	.|.	36|38	26|30	.|.	.|.	28|30	.|.	.|.	.|.	.|.	36|40	.|.	38|28	.|.	.|.	28|30	.|.	.|.	30|30	.|.	.|.	.|.	40|30	.|.	.|.	.|.	.|.	26|30	.|.	.|.	.|.
chr12:100584884-100584928	.|.	.|.	.|.	.|.	.|.	.|.	.|.	.|.	.|.	.|.	.|.	.|.	.|.	.|.	.|.	.|.	.|.	.|.	.|.	.|.	.|.	.|.	34|36	.|.	.|.	.|.	.|.	.|.	.|.	.|.	.|.	.|.	.|.	32|34	.|.	.|.	.|.	.|.	.|.	.|.	.|.	.|.	.|.	.|.	.|.	.|.	.|.	32|34	.|.
chr12:100681050-100681074	.|.	.|.	.|.	.|.	24|24	.|.	.|.	.|.	.|.	.|.	.|.	.|.	.|.	.|.	.|.	.|.	.|.	.|.	.|.	.|.	.|.	.|.	.|.	.|.	24|24	24|24	.|.	.|.	24|24	.|.	.|.	24|24	.|.	.|.	.|.	.|.	24|24	.|.	.|.	.|.	.|.	24|24	24|24	.|.	.|.	.|.	.|.	24|24	.|.
chr12:100702884-100702912	.|.	30|30	.|.	.|.	.|.	26|26	.|.	.|.	.|.	.|.	.|.	28|30	.|.	.|.	28|26	.|.	.|.	.|.	.|.	26|26	.|.	.|.	.|.	26|26	28|30	26|26	28|30	.|.	26|26	28|30	.|.	.|.	26|26	30|30	26|26	.|.	28|30	30|30	26|26	26|30	.|.	.|.	.|.	30|30	26|26	24|26	28|30	24|26	.|.
chr12:10077037-10077067	.|.	.|.	.|.	.|.	.|.	.|.	.|.	.|.	.|.	.|.	.|.	.|.	.|.	.|.	.|.	.|.	.|.	.|.	.|.	30|30	30|30	.|.	.|.	30|30	.|.	30|30	30|30	.|.	.|.	.|.	30|30	.|.	.|.	.|.	.|.	.|.	.|.	.|.	.|.	30|30	30|30	.|.	30|30	.|.	.|.	.|.	.|.	30|30	.|.
chr12:100948170-100948202	.|.	.|.	.|.	.|.	.|.	.|.	.|.	.|.	.|.	.|.	.|.	.|.	.|.	.|.	.|.	32|30	.|.	.|.	.|.	32|30	32|30	.|.	.|.	.|.	32|30	.|.	.|.	.|.	.|.	.|.	.|.	.|.	.|.	.|.	.|.	.|.	.|.	.|.	.|.	.|.	.|.	.|.	34|34	32|30	.|.	.|.	30|30	32|30	.|.
chr12:10100434-10100464	.|.	.|.	.|.	.|.	.|.	.|.	.|.	.|.	.|.	.|.	.|.	.|.	.|.	26|28	.|.	.|.	.|.	.|.	.|.	.|.	.|.	.|.	.|.	.|.	.|.	.|.	.|.	.|.	.|.	.|.	.|.	.|.	.|.	.|.	.|.	.|.	.|.	.|.	.|.	.|.	.|.	.|.	.|.	.|.	.|.	.|.	.|.	.|.	.|.
chr12:101361348-101361384	.|.	.|.	.|.	.|.	.|.	.|.	.|.	.|.	.|.	.|.	.|.	.|.	.|.	.|.	.|.	.|.	.|.	.|.	.|.	.|.	.|.	.|.	.|.	.|.	.|.	.|.	.|.	36|38	.|.	.|.	.|.	.|.	.|.	.|.	.|.	.|.	.|.	.|.	.|.	.|.	32|36	.|.	.|.	.|.	.|.	.|.	.|.	.|.	.|.
chr12:101392157-101392193	.|.	.|.	.|.	.|.	36|36	.|.	.|.	.|.	.|.	.|.	.|.	.|.	.|.	36|36	.|.	.|.	.|.	.|.	.|.	.|.	.|.	.|.	.|.	.|.	.|.	.|.	.|.	.|.	.|.	36|36	.|.	.|.	.|.	.|.	.|.	.|.	.|.	.|.	.|.	.|.	.|.	.|.	.|.	.|.	.|.	.|.	.|.	.|.	.|.
chr12:102658780-102658828	.|.	.|.	.|.	.|.	38|38	.|.	.|.	.|.	38|38	.|.	.|.	.|.	.|.	.|.	.|.	.|.	.|.	.|.	.|.	.|.	38|38	.|.	38|38	.|.	40|42	.|.	.|.	.|.	38|38	.|.	.|.	42|42	40|40	.|.	.|.	.|.	38|40	.|.	.|.	.|.	.|.	.|.	.|.	.|.	.|.	.|.	.|.	.|.	.|.
chr12:102772188-102772218	.|.	.|.	.|.	.|.	.|.	.|.	.|.	.|.	.|.	.|.	.|.	.|.	.|.	.|.	.|.	.|.	.|.	.|.	.|.	28|28	.|.	.|.	30|30	.|.	.|.	.|.	.|.	.|.	30|32	.|.	.|.	.|.	.|.	.|.	.|.	.|.	.|.	.|.	.|.	.|.	30|32	.|.	.|.	.|.	.|.	.|.	.|.	.|.	.|.
chr12:103113210-103113240	34|34	36|40	40|40	.|.	.|.	.|.	.|.	.|.	.|.	.|.	.|.	.|.	.|.	.|.	.|.	.|.	.|.	.|.	.|.	34|34	.|.	36|40	.|.	34|40	.|.	38|40	.|.	34|38	38|40	.|.	34|34	36|40	34|34	.|.	36|40	40|40	34|38	34|34	.|.	32|34	40|40	40|40	.|.	.|.	34|40	.|.	36|40	.|.	.|.
chr12:103443997-103444031	.|.	.|.	.|.	.|.	.|.	.|.	.|.	.|.	26|28	.|.	.|.	.|.	.|.	.|.	.|.	.|.	.|.	.|.	.|.	.|.	.|.	.|.	28|28	.|.	.|.	.|.	.|.	.|.	.|.	.|.	.|.	.|.	.|.	.|.	.|.	.|.	.|.	.|.	.|.	.|.	.|.	.|.	.|.	.|.	.|.	.|.	.|.	26|26	.|.
chr12:103914302-103914332	.|.	.|.	.|.	.|.	.|.	.|.	.|.	30|30	.|.	.|.	.|.	.|.	.|.	.|.	.|.	27|27	.|.	.|.	.|.	30|30	.|.	.|.	.|.	.|.	.|.	.|.	30|30	30|30	30|30	.|.	.|.	.|.	30|30	.|.	.|.	30|30	.|.	.|.	30|30	.|.	30|30	30|30	30|30	30|30	30|30	.|.	30|30	.|.	.|.
chr12:104095755-104095801	.|.	.|.	.|.	30|30	.|.	.|.	.|.	.|.	36|38	.|.	.|.	30|30	.|.	.|.	.|.	.|.	.|.	.|.	.|.	36|38	.|.	28|28	30|30	38|38	30|38	.|.	30|30	.|.	.|.	.|.	.|.	.|.	.|.	36|38	.|.	30|30	.|.	.|.	.|.	34|38	.|.	36|38	.|.	.|.	.|.	.|.	.|.	28|30	.|.
chr12:104264603-104264663	.|.	.|.	.|.	.|.	.|.	.|.	.|.	.|.	.|.	.|.	.|.	.|.	.|.	.|.	.|.	.|.	.|.	.|.	.|.	.|.	.|.	.|.	.|.	.|.	.|.	.|.	.|.	.|.	.|.	.|.	.|.	.|.	.|.	.|.	.|.	.|.	.|.	.|.	.|.	.|.	.|.	.|.	.|.	.|.	.|.	.|.	.|.	.|.	.|.
chr12:104401011-104401043	.|.	.|.	.|.	.|.	.|.	.|.	.|.	.|.	.|.	.|.	.|.	.|.	26|26	.|.	.|.	.|.	.|.	.|.	.|.	.|.	.|.	.|.	.|.	.|.	.|.	.|.	.|.	32|46	.|.	.|.	.|.	.|.	.|.	.|.	26|24	.|.	.|.	.|.	46|26	24|24	26|26	.|.	.|.	26|26	.|.	.|.	.|.	.|.	.|.
chr12:104465354-104465379	.|.	.|.	.|.	.|.	.|.	.|.	25|25	.|.	.|.	.|.	.|.	.|.	25|25	.|.	.|.	25|25	.|.	.|.	.|.	25|25	.|.	.|.	25|25	.|.	.|.	.|.	.|.	25|25	.|.	25|25	.|.	25|25	.|.	.|.	25|25	25|25	.|.	.|.	25|25	25|25	25|25	25|25	.|.	.|.	.|.	25|25	25|25	25|25	.|.
chr12:10451798-10451823	.|.	.|.	.|.	.|.	.|.	.|.	.|.	.|.	.|.	.|.	.|.	.|.	.|.	.|.	.|.	.|.	.|.	.|.	.|.	.|.	.|.	.|.	.|.	.|.	.|.	.|.	.|.	.|.	.|.	.|.	.|.	.|.	.|.	.|.	.|.	.|.	.|.	.|.	.|.	.|.	.|.	.|.	.|.	.|.	.|.	.|.	.|.	.|.	.|.
chr12:104635471-104635495	.|.	.|.	.|.	.|.	.|.	.|.	.|.	.|.	.|.	.|.	.|.	.|.	24|24	24|24	.|.	.|.	.|.	.|.	.|.	24|24	.|.	.|.	.|.	24|24	.|.	.|.	.|.	.|.	.|.	.|.	.|.	.|.	24|24	24|24	.|.	.|.	.|.	.|.	.|.	24|24	24|24	.|.	.|.	24|24	.|.	.|.	.|.	24|24	24|24
chr12:104867693-104867717	.|.	24|24	24|24	.|.	.|.	.|.	.|.	.|.	.|.	24|24	.|.	.|.	.|.	.|.	.|.	24|24	.|.	.|.	.|.	24|24	.|.	.|.	.|.	24|24	.|.	24|24	24|24	.|.	24|24	.|.	.|.	.|.	24|24	.|.	.|.	24|24	24|24	.|.	24|24	.|.	24|24	24|24	.|.	24|24	.|.	.|.	.|.	.|.	.|.
chr12:105167249-105167275	26|36	.|.	.|.	.|.	26|26	26|36	36|38	26|38	26|38	36|38	36|38	26|38	26|38	36|38	26|26	26|36	26|26	26|26	.|.	26|40	26|26	36|40	26|38	.|.	26|42	26|40	26|40	38|40	26|36	26|26	26|40	.|.	26|38	.|.	.|.	26|40	26|40	38|40	34|40	26|38	26|38	26|40	26|38	26|40	26|38	34|38	26|40	26|26	26|38
chr12:105242674-105242700	.|.	.|.	.|.	.|.	.|.	.|.	.|.	.|.	.|.	.|.	.|.	.|.	.|.	.|.	.|.	.|.	.|.	.|.	.|.	22|22	.|.	.|.	.|.	.|.	.|.	.|.	.|.	.|.	.|.	.|.	.|.	.|.	.|.	.|.	.|.	.|.	.|.	.|.	.|.	.|.	.|.	.|.	.|.	.|.	.|.	.|.	.|.	.|.	.|.
chr12:105260159-105260193	.|.	.|.	.|.	.|.	.|.	.|.	.|.	.|.	.|.	.|.	.|.	.|.	28|30	.|.	.|.	.|.	.|.	.|.	.|.	.|.	.|.	.|.	.|.	.|.	.|.	20|22	.|.	.|.	.|.	.|.	.|.	.|.	.|.	.|.	.|.	.|.	.|.	.|.	.|.	.|.	.|.	28|30	.|.	.|.	.|.	.|.	.|.	.|.	.|.
chr12:105939418-105939468	.|.	26|26	.|.	.|.	.|.	.|.	.|.	.|.	.|.	.|.	.|.	.|.	.|.	.|.	.|.	.|.	.|.	48|54	.|.	.|.	.|.	.|.	.|.	.|.	.|.	.|.	.|.	.|.	.|.	.|.	.|.	.|.	52|56	.|.	.|.	.|.	.|.	.|.	.|.	.|.	.|.	.|.	.|.	.|.	.|.	.|.	.|.	.|.	.|.
chr12:106469064-106469096	.|.	.|.	.|.	58|54	.|.	.|.	.|.	.|.	.|.	.|.	.|.	.|.	.|.	62|56	.|.	.|.	.|.	.|.	.|.	.|.	.|.	62|56	.|.	.|.	38|36	.|.	.|.	.|.	.|.	.|.	36|34	.|.	.|.	.|.	.|.	.|.	.|.	.|.	.|.	60|56	.|.	.|.	.|.	.|.	.|.	36|34	.|.	.|.	.|.
chr12:107317913-107317943	30|30	.|.	.|.	.|.	.|.	.|.	.|.	.|.	.|.	.|.	.|.	.|.	.|.	.|.	.|.	.|.	.|.	.|.	.|.	.|.	.|.	.|.	30|30	.|.	.|.	.|.	.|.	30|30	30|30	.|.	30|30	.|.	30|30	.|.	.|.	.|.	30|30	30|30	30|30	.|.	30|30	30|30	.|.	30|30	.|.	30|30	.|.	.|.	.|.
chr12:107354813-107354843	30|30	30|30	.|.	.|.	30|30	.|.	30|30	.|.	.|.	30|30	30|30	30|25	.|.	30|30	.|.	.|.	.|.	.|.	30|30	30|30	30|30	.|.	.|.	.|.	.|.	.|.	.|.	30|30	.|.	.|.	30|30	.|.	.|.	.|.	30|30	30|30	.|.	.|.	30|30	30|30	30|30	30|30	30|30	30|30	30|30	30|30	.|.	30|30	30|30
chr12:107543517-107543553	.|.	.|.	36|33	.|.	.|.	.|.	.|.	.|.	.|.	.|.	.|.	.|.	.|.	.|.	.|.	.|.	.|.	.|.	.|.	.|.	.|.	.|.	.|.	.|.	.|.	.|.	.|.	36|36	.|.	.|.	.|.	.|.	36|36	.|.	.|.	.|.	.|.	.|.	.|.	.|.	.|.	.|.	.|.	.|.	.|.	.|.	.|.	.|.	.|.
chr12:107901843-107901887	44|44	.|.	.|.	.|.	.|.	32|32	.|.	.|.	.|.	.|.	.|.	32|32	.|.	.|.	44|44	.|.	.|.	.|.	32|32	.|.	44|44	44|44	.|.	.|.	32|32	44|44	44|44	44|44	44|32	.|.	44|32	.|.	44|44	32|32	.|.	32|32	44|44	32|32	44|44	44|44	32|32	44|44	44|44	.|.	44|32	44|44	32|32	44|44	.|.
chr12:107957867-107957913	.|.	.|.	.|.	.|.	.|.	.|.	.|.	.|.	.|.	.|.	.|.	.|.	.|.	.|.	.|.	.|.	.|.	.|.	.|.	.|.	.|.	.|.	.|.	.|.	.|.	.|.	.|.	.|.	.|.	.|.	.|.	.|.	.|.	.|.	.|.	.|.	.|.	.|.	.|.	.|.	.|.	.|.	.|.	.|.	.|.	.|.	.|.	.|.	.|.
chr12:107960425-107960461	.|.	.|.	.|.	.|.	.|.	28|42	.|.	.|.	.|.	.|.	40|42	.|.	26|28	.|.	.|.	.|.	.|.	.|.	.|.	.|.	.|.	.|.	28|28	.|.	.|.	.|.	.|.	.|.	28|28	.|.	.|.	28|28	.|.	.|.	.|.	36|40	.|.	.|.	36|40	.|.	36|40	40|40	.|.	.|.	.|.	40|42	40|42	.|.	.|.
chr12:108132655-108132691	.|.	32|34	.|.	.|.	32|34	32|34	.|.	32|34	.|.	.|.	.|.	32|34	.|.	.|.	32|34	.|.	.|.	.|.	.|.	.|.	.|.	.|.	32|34	30|30	.|.	.|.	26|30	.|.	.|.	.|.	.|.	.|.	32|34	.|.	.|.	.|.	30|30	30|30	34|34	34|34	.|.	28|28	34|32	28|32	28|30	.|.	.|.	.|.	.|.
chr12:108314341-108314369	.|.	.|.	.|.	.|.	.|.	.|.	.|.	.|.	.|.	26|26	.|.	.|.	.|.	.|.	30|30	.|.	.|.	.|.	26|30	.|.	.|.	.|.	28|30	.|.	.|.	.|.	.|.	.|.	30|30	.|.	26|26	.|.	.|.	.|.	.|.	.|.	.|.	.|.	.|.	.|.	.|.	.|.	.|.	.|.	.|.	.|.	.|.	30|30	.|.
chr12:109519428-109519468	.|.	.|.	36|34	.|.	.|.	.|.	.|.	.|.	.|.	.|.	.|.	.|.	36|34	.|.	.|.	.|.	.|.	.|.	.|.	28|30	.|.	28|30	.|.	.|.	28|30	28|30	.|.	28|34	.|.	.|.	.|.	.|.	30|32	36|34	.|.	28|28	.|.	36|34	.|.	36|24	.|.	.|.	.|.	36|34	28|26	30|32	36|34	30|32	28|34
chr12:110067898-110067932	.|.	34|38	.|.	38|40	.|.	38|40	36|40	.|.	.|.	36|40	.|.	.|.	34|36	.|.	34|40	34|38	.|.	.|.	.|.	34|38	34|36	.|.	34|36	36|38	34|38	32|36	.|.	34|36	32|36	.|.	36|38	.|.	.|.	.|.	.|.	34|36	34|38	.|.	36|38	32|36	34|38	34|38	34|36	34|36	.|.	36|38	34|36	.|.	.|.
chr12:110402425-110402481	.|.	44|46	.|.	.|.	.|.	.|.	.|.	.|.	.|.	.|.	.|.	44|44	.|.	.|.	.|.	48|46	.|.	.|.	.|.	42|44	.|.	.|.	42|46	.|.	.|.	.|.	.|.	.|.	.|.	.|.	62|44	.|.	.|.	.|.	.|.	40|44	.|.	.|.	.|.	.|.	.|.	.|.	.|.	.|.	.|.	.|.	.|.	.|.	.|.
chr12:111579031-111579059	.|.	.|.	.|.	.|.	.|.	.|.	.|.	30|30	.|.	.|.	.|.	.|.	.|.	.|.	.|.	.|.	.|.	.|.	.|.	24|26	.|.	24|24	.|.	.|.	.|.	.|.	.|.	.|.	24|24	.|.	.|.	.|.	28|24	28|28	.|.	.|.	28|26	28|28	.|.	.|.	24|24	.|.	.|.	.|.	.|.	.|.	.|.	.|.	.|.
chr12:111816923-111816967	.|.	.|.	.|.	.|.	.|.	.|.	.|.	.|.	.|.	.|.	.|.	.|.	.|.	.|.	30|32	.|.	.|.	.|.	.|.	.|.	.|.	.|.	.|.	.|.	30|34	32|34	.|.	.|.	.|.	.|.	.|.	.|.	.|.	.|.	.|.	.|.	.|.	.|.	.|.	.|.	.|.	.|.	.|.	.|.	.|.	.|.	.|.	.|.	.|.
chr12:112325618-112325658	32|34	.|.	.|.	.|.	.|.	28|30	.|.	.|.	.|.	.|.	.|.	.|.	.|.	.|.	30|30	.|.	.|.	.|.	.|.	30|34	.|.	.|.	.|.	28|30	.|.	.|.	28|30	.|.	.|.	.|.	.|.	.|.	32|34	.|.	.|.	30|34	.|.	.|.	.|.	32|34	30|36	.|.	.|.	.|.	.|.	.|.	.|.	.|.	.|.
chr12:112685781-112685809	.|.	.|.	.|.	.|.	.|.	.|.	.|.	.|.	.|.	.|.	.|.	.|.	.|.	.|.	.|.	.|.	.|.	22|22	.|.	22|22	.|.	.|.	.|.	.|.	.|.	.|.	.|.	.|.	.|.	.|.	.|.	.|.	.|.	.|.	.|.	.|.	.|.	.|.	.|.	.|.	.|.	.|.	.|.	.|.	.|.	.|.	.|.	.|.	.|.
chr12:112909258-112909294	.|.	.|.	.|.	.|.	32|34	.|.	32|34	.|.	.|.	.|.	.|.	26|28	.|.	.|.	.|.	.|.	.|.	.|.	.|.	28|34	28|28	.|.	.|.	.|.	.|.	28|28	34|34	.|.	34|34	.|.	.|.	32|34	.|.	.|.	.|.	.|.	.|.	.|.	30|34	.|.	.|.	.|.	.|.	.|.	.|.	.|.	.|.	.|.	.|.
chr12:113564938-113564962	.|.	.|.	.|.	.|.	24|24	.|.	24|24	.|.	.|.	.|.	.|.	.|.	.|.	.|.	.|.	.|.	.|.	.|.	.|.	.|.	.|.	24|24	.|.	.|.	.|.	.|.	.|.	.|.	.|.	.|.	.|.	.|.	.|.	.|.	.|.	24|24	.|.	.|.	24|24	24|24	24|24	.|.	24|24	.|.	24|24	.|.	24|24	.|.	.|.
chr12:113839179-113839215	36|36	36|36	36|36	.|.	.|.	.|.	.|.	36|36	36|36	.|.	.|.	.|.	.|.	.|.	.|.	.|.	.|.	.|.	.|.	.|.	36|36	.|.	36|36	.|.	.|.	.|.	36|36	.|.	36|36	.|.	36|36	.|.	36|36	.|.	.|.	36|36	36|36	.|.	36|36	.|.	.|.	36|36	36|36	36|36	.|.	36|36	36|36	.|.	.|.
chr12:114711206-114711236	.|.	36|38	.|.	.|.	.|.	.|.	.|.	.|.	.|.	.|.	.|.	.|.	.|.	.|.	.|.	.|.	.|.	36|38	.|.	.|.	.|.	.|.	.|.	36|38	36|38	36|38	.|.	.|.	30|38	.|.	.|.	.|.	36|38	.|.	.|.	.|.	.|.	34|36	.|.	.|.	.|.	.|.	.|.	.|.	.|.	.|.	.|.	.|.	.|.
chr12:115113438-115113480	.|.	28|28	.|.	.|.	.|.	.|.	.|.	.|.	.|.	.|.	.|.	28|28	.|.	.|.	.|.	.|.	.|.	.|.	.|.	.|.	.|.	.|.	.|.	.|.	.|.	24|28	.|.	.|.	.|.	.|.	.|.	.|.	.|.	.|.	.|.	.|.	.|.	.|.	.|.	24|28	.|.	.|.	.|.	.|.	.|.	.|.	.|.	.|.	.|.
chr12:115115825-115115861	.|.	.|.	.|.	.|.	.|.	40|42	.|.	.|.	42|44	.|.	.|.	40|42	36|34	.|.	.|.	.|.	.|.	.|.	.|.	42|42	.|.	.|.	.|.	.|.	.|.	.|.	36|38	.|.	.|.	.|.	.|.	.|.	.|.	.|.	.|.	36|34	.|.	.|.	36|34	.|.	36|34	.|.	40|42	.|.	40|42	.|.	.|.	.|.	.|.
chr12:115305473-115305497	.|.	27|27	.|.	.|.	.|.	.|.	.|.	.|.	.|.	24|24	.|.	.|.	.|.	.|.	.|.	.|.	.|.	.|.	.|.	.|.	.|.	27|27	.|.	.|.	24|24	.|.	.|.	.|.	.|.	.|.	.|.	.|.	.|.	.|.	.|.	.|.	.|.	.|.	.|.	.|.	.|.	.|.	.|.	.|.	.|.	.|.	.|.	.|.	.|.
chr12:115327874-115327906	26|28	22|22	.|.	22|22	.|.	.|.	.|.	.|.	.|.	.|.	.|.	22|26	.|.	.|.	.|.	.|.	.|.	.|.	.|.	.|.	.|.	.|.	.|.	26|28	.|.	22|22	.|.	.|.	.|.	.|.	.|.	26|28	.|.	26|28	.|.	.|.	26|28	.|.	.|.	26|28	22|28	22|22	.|.	.|.	.|.	28|28	.|.	.|.	.|.
chr12:115566493-115566525	.|.	.|.	44|46	.|.	.|.	.|.	.|.	.|.	.|.	.|.	.|.	.|.	.|.	.|.	.|.	.|.	.|.	.|.	.|.	.|.	.|.	.|.	.|.	.|.	.|.	.|.	.|.	.|.	.|.	.|.	.|.	.|.	.|.	.|.	.|.	.|.	.|.	.|.	.|.	.|.	.|.	.|.	.|.	.|.	.|.	.|.	.|.	.|.	.|.
chr12:115797497-115797527	.|.	.|.	.|.	32|32	.|.	.|.	.|.	.|.	.|.	.|.	.|.	.|.	.|.	.|.	.|.	.|.	.|.	.|.	.|.	.|.	.|.	.|.	26|26	.|.	.|.	.|.	.|.	32|32	.|.	.|.	.|.	.|.	.|.	.|.	.|.	.|.	30|32	.|.	.|.	.|.	30|32	.|.	.|.	.|.	.|.	.|.	.|.	.|.	.|.
chr12:115948102-115948130	.|.	.|.	.|.	.|.	.|.	.|.	.|.	.|.	.|.	.|.	.|.	.|.	.|.	.|.	.|.	.|.	.|.	.|.	.|.	.|.	.|.	.|.	.|.	28|28	.|.	.|.	.|.	.|.	.|.	.|.	.|.	.|.	.|.	.|.	.|.	.|.	.|.	.|.	.|.	.|.	.|.	.|.	.|.	.|.	.|.	.|.	.|.	.|.	.|.
chr12:116221024-116221054	.|.	.|.	.|.	.|.	.|.	.|.	.|.	.|.	.|.	.|.	.|.	.|.	.|.	.|.	.|.	.|.	.|.	30|28	.|.	.|.	.|.	.|.	30|28	.|.	.|.	.|.	.|.	20|20	.|.	.|.	20|20	.|.	.|.	.|.	.|.	20|20	.|.	.|.	30|28	.|.	.|.	.|.	.|.	.|.	.|.	.|.	.|.	.|.	.|.
chr12:116772109-116772147	30|32	.|.	.|.	.|.	.|.	.|.	.|.	.|.	30|32	.|.	.|.	.|.	.|.	.|.	.|.	.|.	.|.	.|.	30|32	30|32	.|.	.|.	.|.	.|.	.|.	.|.	.|.	30|32	.|.	.|.	.|.	.|.	.|.	.|.	30|32	.|.	.|.	.|.	.|.	.|.	.|.	.|.	30|32	.|.	.|.	.|.	30|32	.|.	.|.
chr12:116826768-116826804	.|.	.|.	.|.	.|.	.|.	.|.	.|.	.|.	.|.	.|.	.|.	.|.	.|.	.|.	.|.	.|.	.|.	.|.	.|.	36|32	32|34	.|.	.|.	34|34	.|.	.|.	30|30	.|.	30|30	.|.	.|.	.|.	.|.	.|.	.|.	.|.	30|34	.|.	30|30	.|.	.|.	.|.	30|30	28|30	.|.	.|.	30|30	.|.	.|.
chr12:1174646-1174686	.|.	.|.	.|.	.|.	30|32	.|.	.|.	.|.	.|.	.|.	.|.	.|.	.|.	.|.	.|.	.|.	.|.	.|.	.|.	.|.	.|.	.|.	.|.	.|.	.|.	.|.	.|.	.|.	30|32	.|.	.|.	.|.	.|.	.|.	.|.	.|.	.|.	.|.	.|.	.|.	32|32	.|.	.|.	.|.	.|.	.|.	.|.	32|32	.|.
chr12:118710110-118710134	.|.	.|.	.|.	.|.	.|.	.|.	.|.	.|.	.|.	.|.	.|.	.|.	.|.	.|.	.|.	.|.	.|.	.|.	.|.	.|.	.|.	.|.	.|.	.|.	.|.	.|.	.|.	.|.	.|.	.|.	.|.	.|.	.|.	.|.	.|.	.|.	.|.	.|.	.|.	.|.	.|.	.|.	.|.	.|.	.|.	.|.	.|.	.|.	.|.
chr12:119170361-119170421	.|.	.|.	52|56	.|.	.|.	.|.	.|.	.|.	.|.	52|56	.|.	52|56	.|.	.|.	.|.	.|.	.|.	.|.	.|.	.|.	.|.	.|.	.|.	.|.	.|.	.|.	.|.	.|.	.|.	.|.	.|.	.|.	.|.	.|.	.|.	.|.	.|.	.|.	.|.	.|.	52|58	.|.	.|.	.|.	.|.	.|.	.|.	.|.	.|.
chr12:119627107-119627147	.|.	44|42	.|.	.|.	.|.	36|38	44|42	.|.	.|.	.|.	.|.	44|44	.|.	.|.	44|44	.|.	.|.	.|.	.|.	42|42	.|.	38|42	38|38	.|.	.|.	44|42	.|.	44|42	44|44	.|.	.|.	.|.	44|38	.|.	.|.	38|42	.|.	44|42	38|38	.|.	44|38	44|42	38|38	.|.	.|.	.|.	40|44	.|.	.|.
chr12:120212362-120212388	.|.	.|.	.|.	.|.	.|.	.|.	.|.	.|.	.|.	.|.	.|.	.|.	.|.	.|.	.|.	.|.	.|.	.|.	.|.	.|.	.|.	.|.	16|16	.|.	16|16	.|.	.|.	.|.	.|.	.|.	.|.	.|.	.|.	.|.	.|.	.|.	.|.	.|.	.|.	.|.	.|.	.|.	.|.	.|.	.|.	.|.	.|.	.|.	.|.
chr12:120245824-120245848	.|.	.|.	.|.	.|.	.|.	.|.	.|.	.|.	.|.	.|.	.|.	.|.	.|.	.|.	.|.	.|.	24|24	.|.	.|.	.|.	.|.	.|.	.|.	.|.	.|.	.|.	.|.	.|.	.|.	.|.	.|.	.|.	.|.	.|.	.|.	24|24	.|.	.|.	.|.	.|.	.|.	.|.	.|.	24|24	.|.	.|.	.|.	.|.	.|.
chr12:120399811-120399837	.|.	.|.	.|.	.|.	.|.	.|.	.|.	.|.	.|.	.|.	.|.	.|.	.|.	.|.	.|.	.|.	.|.	.|.	.|.	.|.	.|.	.|.	.|.	.|.	.|.	.|.	.|.	.|.	.|.	.|.	.|.	.|.	.|.	.|.	.|.	.|.	26|25	.|.	.|.	.|.	.|.	.|.	.|.	.|.	.|.	.|.	.|.	.|.	.|.
chr12:12255598-12255638	38|38	.|.	.|.	50|56	.|.	.|.	.|.	.|.	48|52	50|42	.|.	40|38	.|.	.|.	50|42	40|38	.|.	36|38	.|.	36|50	38|50	50|52	50|42	48|50	50|50	46|50	46|50	.|.	.|.	36|38	46|50	48|52	36|38	50|50	36|38	48|50	38|50	36|38	38|50	38|50	48|50	36|38	46|50	48|50	48|52	38|50	48|52	48|50	.|.
chr12:122723317-122723353	.|.	.|.	.|.	.|.	.|.	.|.	.|.	.|.	.|.	.|.	.|.	.|.	.|.	.|.	.|.	.|.	.|.	.|.	.|.	.|.	22|22	.|.	.|.	.|.	22|22	.|.	.|.	.|.	.|.	.|.	.|.	.|.	.|.	.|.	.|.	.|.	.|.	.|.	.|.	.|.	.|.	.|.	.|.	.|.	.|.	.|.	.|.	.|.	.|.
chr12:123089080-123089104	.|.	.|.	.|.	.|.	.|.	.|.	.|.	24|24	.|.	.|.	.|.	.|.	.|.	.|.	.|.	.|.	.|.	.|.	.|.	.|.	.|.	.|.	.|.	.|.	.|.	.|.	.|.	.|.	.|.	.|.	.|.	.|.	.|.	.|.	.|.	.|.	.|.	.|.	.|.	.|.	.|.	.|.	.|.	.|.	.|.	.|.	.|.	.|.	.|.
chr12:125937622-125937660	.|.	36|38	.|.	.|.	.|.	.|.	.|.	.|.	.|.	.|.	.|.	.|.	.|.	30|32	38|40	30|32	.|.	.|.	.|.	38|38	.|.	.|.	.|.	.|.	32|32	.|.	.|.	.|.	.|.	.|.	30|32	.|.	.|.	.|.	.|.	.|.	.|.	.|.	.|.	30|30	.|.	.|.	.|.	.|.	.|.	30|32	.|.	36|40	.|.
chr12:126199937-126199975	.|.	.|.	.|.	.|.	.|.	.|.	.|.	.|.	.|.	.|.	.|.	.|.	.|.	.|.	.|.	.|.	.|.	.|.	.|.	.|.	.|.	.|.	.|.	.|.	.|.	30|30	.|.	34|36	.|.	.|.	.|.	.|.	34|36	.|.	.|.	.|.	.|.	.|.	.|.	.|.	.|.	.|.	.|.	.|.	34|36	.|.	.|.	.|.	.|.
chr12:126222810-126222866	.|.	.|.	.|.	.|.	.|.	.|.	.|.	44|48	.|.	.|.	.|.	.|.	.|.	.|.	.|.	.|.	.|.	.|.	.|.	.|.	.|.	.|.	.|.	.|.	.|.	.|.	.|.	.|.	.|.	.|.	.|.	.|.	.|.	.|.	.|.	.|.	.|.	.|.	.|.	.|.	.|.	.|.	.|.	.|.	.|.	.|.	.|.	.|.	.|.
chr12:126255155-126255187	.|.	.|.	.|.	.|.	.|.	.|.	.|.	.|.	.|.	.|.	.|.	.|.	.|.	.|.	.|.	.|.	.|.	.|.	.|.	.|.	40|40	.|.	.|.	.|.	38|40	.|.	.|.	.|.	.|.	.|.	.|.	.|.	44|46	.|.	.|.	.|.	.|.	38|40	44|46	.|.	.|.	44|46	.|.	.|.	.|.	44|46	.|.	.|.	.|.
chr12:126430034-126430062	.|.	.|.	.|.	.|.	.|.	28|28	.|.	.|.	.|.	28|28	.|.	.|.	.|.	.|.	.|.	.|.	.|.	.|.	.|.	.|.	.|.	.|.	.|.	.|.	.|.	.|.	28|28	.|.	.|.	.|.	.|.	.|.	.|.	.|.	.|.	.|.	.|.	.|.	.|.	.|.	.|.	.|.	.|.	.|.	.|.	.|.	.|.	.|.	.|.
chr12:12678665-12678695	.|.	.|.	.|.	.|.	.|.	.|.	.|.	.|.	.|.	.|.	.|.	32|32	.|.	.|.	.|.	.|.	.|.	.|.	.|.	.|.	.|.	.|.	.|.	.|.	.|.	.|.	.|.	.|.	32|32	.|.	.|.	.|.	.|.	.|.	.|.	.|.	.|.	.|.	.|.	.|.	.|.	.|.	.|.	28|28	.|.	.|.	.|.	.|.	.|.
chr12:127001452-127001488	.|.	.|.	.|.	.|.	.|.	.|.	.|.	.|.	.|.	.|.	.|.	.|.	.|.	.|.	.|.	.|.	.|.	.|.	26|26	.|.	.|.	.|.	.|.	.|.	.|.	.|.	34|34	.|.	.|.	.|.	.|.	.|.	.|.	.|.	.|.	.|.	.|.	.|.	.|.	.|.	.|.	.|.	34|34	.|.	.|.	.|.	.|.	.|.	.|.
chr12:127813362-127813386	.|.	.|.	.|.	.|.	.|.	.|.	.|.	.|.	24|24	24|24	.|.	.|.	.|.	.|.	.|.	.|.	.|.	.|.	.|.	24|28	.|.	.|.	24|24	.|.	28|28	.|.	.|.	.|.	24|24	.|.	.|.	.|.	24|24	.|.	.|.	24|24	.|.	.|.	.|.	24|26	.|.	28|28	24|28	24|24	.|.	26|26	.|.	.|.	28|28
chr12:127859429-127859463	30|30	.|.	.|.	34|32	.|.	.|.	.|.	.|.	.|.	.|.	.|.	.|.	.|.	.|.	.|.	.|.	.|.	30|30	.|.	.|.	.|.	.|.	28|30	.|.	.|.	.|.	34|32	.|.	.|.	.|.	.|.	.|.	.|.	.|.	.|.	.|.	.|.	.|.	.|.	.|.	.|.	.|.	.|.	.|.	.|.	.|.	.|.	.|.	.|.
chr12:128290964-128290988	.|.	.|.	.|.	.|.	.|.	.|.	.|.	.|.	.|.	.|.	.|.	.|.	.|.	24|24	.|.	.|.	.|.	.|.	.|.	.|.	.|.	.|.	.|.	24|24	.|.	.|.	.|.	.|.	.|.	.|.	.|.	.|.	.|.	.|.	.|.	.|.	.|.	24|24	.|.	.|.	24|24	.|.	.|.	.|.	.|.	.|.	24|24	.|.	.|.
chr12:128566707-128566737	52|54	.|.	34|34	.|.	.|.	.|.	.|.	.|.	.|.	52|54	.|.	34|34	.|.	.|.	.|.	.|.	.|.	.|.	.|.	.|.	.|.	.|.	.|.	.|.	.|.	34|34	.|.	50|52	.|.	.|.	.|.	.|.	.|.	.|.	34|54	34|34	52|54	.|.	.|.	52|54	34|52	34|54	32|32	34|34	32|34	.|.	.|.	34|54	.|.
chr12:128694665-128694695	.|.	.|.	.|.	.|.	.|.	.|.	.|.	.|.	.|.	.|.	.|.	.|.	.|.	.|.	.|.	.|.	.|.	.|.	.|.	.|.	.|.	.|.	.|.	.|.	.|.	.|.	.|.	20|22	.|.	.|.	.|.	.|.	.|.	.|.	.|.	.|.	.|.	.|.	.|.	.|.	.|.	.|.	.|.	.|.	.|.	.|.	.|.	.|.	.|.
chr12:128843038-128843070	.|.	.|.	.|.	42|44	.|.	.|.	.|.	.|.	.|.	.|.	.|.	.|.	.|.	.|.	40|44	.|.	.|.	.|.	.|.	.|.	38|42	.|.	30|42	.|.	.|.	40|42	.|.	38|40	38|42	.|.	.|.	.|.	38|42	.|.	40|44	.|.	40|42	32|30	.|.	.|.	40|42	.|.	.|.	.|.	32|30	32|30	.|.	.|.	.|.
chr12:129967490-129967536	50|50	.|.	.|.	.|.	.|.	.|.	.|.	.|.	.|.	.|.	.|.	.|.	.|.	.|.	.|.	.|.	.|.	.|.	.|.	.|.	.|.	.|.	.|.	.|.	.|.	.|.	.|.	.|.	.|.	.|.	56|60	.|.	.|.	.|.	.|.	.|.	.|.	.|.	50|52	.|.	.|.	50|52	50|52	.|.	.|.	.|.	.|.	52|56	.|.
chr12:13327291-13327315	.|.	.|.	.|.	.|.	24|24	.|.	28|28	.|.	.|.	.|.	.|.	.|.	.|.	.|.	26|28	.|.	.|.	.|.	.|.	.|.	.|.	.|.	.|.	.|.	.|.	.|.	.|.	.|.	26|28	.|.	.|.	.|.	.|.	.|.	.|.	.|.	.|.	.|.	.|.	.|.	.|.	.|.	.|.	.|.	.|.	.|.	.|.	.|.	.|.
chr12:133318770-133318806	.|.	.|.	36|38	.|.	28|28	.|.	.|.	.|.	.|.	.|.	.|.	.|.	.|.	.|.	28|28	.|.	.|.	.|.	.|.	36|34	.|.	.|.	.|.	.|.	28|28	.|.	.|.	.|.	.|.	.|.	.|.	.|.	.|.	.|.	.|.	.|.	.|.	.|.	.|.	.|.	.|.	.|.	.|.	.|.	.|.	.|.	.|.	28|28	.|.
chr12:13619469-13619499	.|.	.|.	.|.	.|.	.|.	.|.	.|.	.|.	.|.	.|.	.|.	.|.	.|.	.|.	.|.	.|.	.|.	.|.	.|.	.|.	.|.	.|.	.|.	.|.	.|.	.|.	.|.	.|.	.|.	.|.	.|.	.|.	.|.	.|.	.|.	.|.	.|.	.|.	.|.	.|.	.|.	.|.	.|.	.|.	.|.	.|.	.|.	.|.	.|.
chr12:13795123-13795155	.|.	.|.	.|.	.|.	24|24	.|.	.|.	.|.	.|.	.|.	.|.	.|.	24|24	.|.	24|24	.|.	.|.	24|24	.|.	24|24	.|.	.|.	24|24	24|24	.|.	.|.	.|.	.|.	.|.	.|.	24|24	.|.	24|24	.|.	.|.	24|24	24|24	.|.	.|.	24|24	.|.	.|.	.|.	24|24	.|.	.|.	.|.	.|.	.|.
chr12:14347332-14347359	.|.	.|.	.|.	.|.	.|.	24|24	.|.	.|.	.|.	24|24	30|30	.|.	.|.	.|.	.|.	.|.	.|.	.|.	.|.	.|.	30|30	.|.	.|.	.|.	24|24	.|.	.|.	.|.	.|.	.|.	.|.	.|.	.|.	.|.	.|.	30|30	.|.	.|.	.|.	.|.	.|.	.|.	.|.	.|.	24|24	.|.	.|.	.|.	.|.
chr12:14561050-14561076	.|.	.|.	.|.	.|.	.|.	.|.	.|.	.|.	.|.	.|.	.|.	.|.	.|.	.|.	.|.	.|.	.|.	.|.	.|.	.|.	.|.	.|.	.|.	.|.	.|.	.|.	.|.	.|.	.|.	.|.	.|.	.|.	.|.	.|.	.|.	.|.	.|.	.|.	28|30	.|.	.|.	.|.	.|.	.|.	.|.	.|.	.|.	.|.	.|.
chr12:14575246-14575290	30|32	.|.	.|.	.|.	30|32	.|.	.|.	.|.	.|.	.|.	.|.	.|.	.|.	.|.	.|.	30|32	.|.	.|.	30|32	.|.	.|.	.|.	.|.	.|.	.|.	30|32	.|.	.|.	.|.	.|.	30|32	.|.	.|.	.|.	.|.	32|32	.|.	.|.	30|32	.|.	.|.	.|.	.|.	.|.	.|.	.|.	.|.	.|.	.|.
chr12:14626224-14626262	50|52	.|.	.|.	34|36	.|.	.|.	.|.	.|.	.|.	.|.	.|.	.|.	.|.	50|52	.|.	.|.	48|52	.|.	.|.	.|.	50|52	.|.	52|54	.|.	.|.	.|.	.|.	.|.	52|52	.|.	.|.	.|.	.|.	.|.	.|.	.|.	.|.	.|.	50|52	50|52	.|.	.|.	.|.	.|.	.|.	.|.	.|.	.|.	.|.
chr12:14886928-14886972	.|.	34|40	.|.	.|.	.|.	.|.	34|40	.|.	.|.	.|.	.|.	.|.	.|.	36|32	.|.	38|42	.|.	.|.	.|.	34|38	36|32	.|.	.|.	36|32	36|32	.|.	34|40	36|32	36|32	.|.	34|40	36|40	34|38	.|.	.|.	.|.	34|40	34|40	.|.	.|.	36|32	38|32	.|.	36|32	34|40	.|.	.|.	34|40	.|.
chr12:15056001-15056035	.|.	.|.	.|.	.|.	.|.	38|40	.|.	40|42	.|.	34|36	.|.	.|.	.|.	.|.	.|.	.|.	.|.	42|46	.|.	38|40	.|.	.|.	40|46	.|.	.|.	.|.	34|38	40|40	42|46	.|.	.|.	44|46	.|.	.|.	.|.	.|.	.|.	.|.	.|.	.|.	.|.	38|40	42|46	42|46	42|46	.|.	.|.	.|.	.|.
chr12:15364218-15364262	36|36	.|.	.|.	46|48	.|.	.|.	.|.	36|36	.|.	.|.	.|.	36|48	.|.	36|46	.|.	.|.	.|.	36|36	.|.	36|50	36|36	36|36	36|36	44|48	.|.	36|36	48|50	.|.	36|48	.|.	36|48	.|.	44|48	.|.	.|.	34|36	.|.	44|46	46|48	.|.	36|46	46|48	.|.	.|.	46|48	.|.	34|34	36|36	.|.
chr12:15548743-15548773	.|.	.|.	.|.	.|.	.|.	.|.	.|.	.|.	.|.	.|.	30|28	.|.	.|.	.|.	.|.	30|28	.|.	.|.	.|.	.|.	.|.	.|.	.|.	.|.	.|.	.|.	.|.	.|.	.|.	.|.	.|.	.|.	.|.	.|.	.|.	.|.	.|.	.|.	.|.	.|.	.|.	.|.	.|.	.|.	.|.	.|.	.|.	.|.	.|.
chr12:16149091-16149125	.|.	.|.	.|.	.|.	.|.	.|.	.|.	.|.	.|.	.|.	.|.	.|.	.|.	.|.	38|40	.|.	.|.	.|.	.|.	.|.	.|.	.|.	.|.	.|.	.|.	.|.	.|.	.|.	.|.	.|.	.|.	.|.	.|.	.|.	.|.	.|.	.|.	.|.	.|.	.|.	38|40	.|.	.|.	.|.	.|.	.|.	.|.	28|28	.|.
chr12:16697155-16697197	.|.	.|.	.|.	.|.	.|.	.|.	.|.	.|.	.|.	.|.	.|.	.|.	.|.	.|.	.|.	.|.	.|.	.|.	.|.	42|38	.|.	.|.	.|.	.|.	42|40	.|.	.|.	.|.	46|48	42|40	.|.	44|46	46|48	.|.	.|.	.|.	.|.	46|48	.|.	.|.	.|.	.|.	.|.	.|.	.|.	.|.	.|.	.|.	.|.
chr12:16884326-16884352	.|.	.|.	.|.	.|.	.|.	.|.	.|.	.|.	.|.	.|.	.|.	.|.	.|.	.|.	.|.	.|.	.|.	.|.	.|.	.|.	.|.	.|.	.|.	.|.	.|.	.|.	.|.	.|.	.|.	.|.	.|.	.|.	.|.	.|.	.|.	.|.	.|.	22|24	.|.	.|.	.|.	.|.	.|.	.|.	.|.	.|.	.|.	.|.	.|.
chr12:17015127-17015171	.|.	44|48	.|.	.|.	48|48	.|.	44|48	48|48	.|.	.|.	.|.	.|.	48|48	.|.	.|.	.|.	.|.	.|.	.|.	44|48	44|44	.|.	.|.	.|.	.|.	44|48	44|48	.|.	.|.	.|.	44|48	44|44	.|.	.|.	.|.	.|.	.|.	44|40	44|48	48|48	44|44	44|44	44|48	44|52	44|48	48|48	44|40	44|48	.|.
chr12:17655847-17655875	.|.	.|.	.|.	.|.	.|.	.|.	.|.	.|.	.|.	.|.	.|.	.|.	.|.	.|.	.|.	.|.	.|.	.|.	28|30	.|.	.|.	.|.	.|.	.|.	24|26	.|.	.|.	.|.	.|.	.|.	.|.	.|.	.|.	.|.	.|.	.|.	.|.	.|.	30|30	.|.	.|.	.|.	24|26	30|30	.|.	.|.	.|.	.|.	.|.
chr12:17911189-17911215	.|.	.|.	.|.	.|.	32|32	.|.	.|.	.|.	.|.	.|.	.|.	.|.	.|.	.|.	.|.	.|.	.|.	.|.	.|.	.|.	.|.	.|.	.|.	.|.	.|.	.|.	.|.	.|.	30|32	.|.	.|.	.|.	.|.	.|.	.|.	.|.	.|.	.|.	.|.	.|.	.|.	.|.	.|.	.|.	22|22	.|.	.|.	.|.	.|.
chr12:18324618-18324650	.|.	.|.	.|.	.|.	.|.	.|.	.|.	.|.	.|.	.|.	.|.	.|.	.|.	.|.	.|.	.|.	.|.	.|.	.|.	.|.	.|.	.|.	.|.	.|.	.|.	.|.	.|.	.|.	.|.	.|.	.|.	.|.	.|.	.|.	.|.	.|.	26|28	.|.	.|.	.|.	.|.	.|.	.|.	.|.	.|.	.|.	.|.	.|.	.|.
chr12:18628307-18628343	.|.	.|.	.|.	.|.	.|.	.|.	.|.	.|.	34|34	.|.	.|.	.|.	.|.	36|36	.|.	.|.	.|.	.|.	.|.	36|34	.|.	.|.	.|.	.|.	36|34	.|.	.|.	.|.	.|.	.|.	.|.	.|.	36|36	.|.	36|34	.|.	.|.	.|.	.|.	.|.	.|.	.|.	.|.	.|.	.|.	.|.	.|.	.|.	.|.
chr12:18971470-18971512	.|.	.|.	.|.	.|.	.|.	.|.	.|.	.|.	.|.	.|.	.|.	.|.	.|.	.|.	.|.	.|.	.|.	.|.	.|.	.|.	.|.	.|.	.|.	.|.	.|.	.|.	.|.	.|.	.|.	.|.	.|.	.|.	.|.	.|.	.|.	.|.	.|.	.|.	.|.	.|.	.|.	.|.	.|.	.|.	.|.	.|.	.|.	.|.	.|.
chr12:19034553-19034591	.|.	38|56	56|60	.|.	.|.	.|.	.|.	40|54	52|56	.|.	.|.	.|.	.|.	.|.	.|.	.|.	.|.	.|.	.|.	.|.	.|.	.|.	40|40	.|.	38|40	.|.	.|.	.|.	.|.	.|.	.|.	54|58	.|.	.|.	.|.	.|.	.|.	.|.	38|40	40|56	.|.	.|.	.|.	.|.	.|.	.|.	.|.	40|42	.|.
chr12:19040118-19040146	.|.	.|.	.|.	.|.	.|.	.|.	.|.	.|.	28|30	.|.	.|.	.|.	28|30	.|.	.|.	.|.	.|.	.|.	.|.	.|.	.|.	.|.	.|.	.|.	.|.	.|.	28|30	.|.	.|.	.|.	.|.	.|.	32|32	.|.	.|.	28|30	.|.	.|.	.|.	.|.	.|.	.|.	30|30	30|30	.|.	.|.	30|30	.|.	30|30
chr12:19316603-19316627	.|.	.|.	.|.	.|.	.|.	.|.	.|.	28|28	.|.	.|.	.|.	.|.	.|.	.|.	.|.	.|.	.|.	.|.	.|.	.|.	.|.	.|.	.|.	.|.	.|.	.|.	.|.	.|.	.|.	.|.	.|.	.|.	.|.	.|.	.|.	.|.	.|.	28|28	.|.	.|.	.|.	.|.	.|.	.|.	.|.	.|.	.|.	.|.	.|.
chr12:19730166-19730200	.|.	.|.	.|.	.|.	.|.	.|.	.|.	.|.	.|.	.|.	.|.	.|.	.|.	.|.	.|.	.|.	.|.	.|.	.|.	.|.	.|.	.|.	.|.	.|.	.|.	.|.	.|.	.|.	30|32	.|.	.|.	.|.	.|.	26|26	.|.	.|.	.|.	.|.	.|.	.|.	24|26	.|.	.|.	.|.	.|.	.|.	.|.	.|.	.|.
chr12:19796994-19797042	.|.	.|.	.|.	.|.	.|.	.|.	.|.	.|.	.|.	.|.	.|.	28|32	.|.	.|.	.|.	.|.	.|.	.|.	.|.	.|.	.|.	.|.	32|32	.|.	.|.	.|.	.|.	.|.	.|.	.|.	.|.	.|.	.|.	.|.	.|.	.|.	.|.	.|.	30|30	.|.	.|.	.|.	.|.	.|.	.|.	.|.	.|.	.|.	.|.
chr12:20202178-20202203	.|.	.|.	.|.	.|.	.|.	.|.	.|.	.|.	.|.	.|.	.|.	.|.	.|.	.|.	.|.	.|.	.|.	.|.	.|.	.|.	.|.	.|.	.|.	.|.	.|.	.|.	.|.	.|.	.|.	.|.	.|.	.|.	.|.	.|.	.|.	40|40	.|.	.|.	.|.	.|.	.|.	.|.	.|.	.|.	.|.	.|.	.|.	.|.	.|.
chr12:20314530-20314556	.|.	.|.	.|.	.|.	.|.	26|26	.|.	.|.	26|26	26|26	.|.	26|26	.|.	26|26	26|26	26|26	.|.	.|.	.|.	26|26	26|26	.|.	.|.	.|.	.|.	26|26	26|26	.|.	26|26	.|.	.|.	.|.	26|26	.|.	26|26	26|26	26|26	.|.	.|.	.|.	.|.	.|.	.|.	26|26	26|26	.|.	.|.	.|.	.|.
chr12:21013533-21013569	.|.	.|.	.|.	.|.	.|.	.|.	.|.	.|.	.|.	.|.	.|.	.|.	.|.	.|.	.|.	.|.	24|26	.|.	.|.	.|.	.|.	26|26	.|.	.|.	.|.	.|.	.|.	26|26	.|.	.|.	.|.	.|.	.|.	.|.	.|.	.|.	.|.	.|.	.|.	.|.	.|.	.|.	.|.	.|.	.|.	.|.	.|.	.|.	.|.
chr12:21409025-21409063	.|.	.|.	.|.	.|.	.|.	.|.	.|.	.|.	.|.	.|.	.|.	.|.	.|.	.|.	.|.	.|.	.|.	.|.	.|.	.|.	.|.	.|.	.|.	.|.	.|.	.|.	.|.	.|.	.|.	.|.	.|.	.|.	.|.	.|.	.|.	.|.	.|.	.|.	.|.	.|.	.|.	42|44	.|.	.|.	.|.	.|.	.|.	.|.	.|.
chr12:21683242-21683267	.|.	.|.	.|.	.|.	.|.	.|.	.|.	.|.	.|.	.|.	.|.	.|.	.|.	.|.	.|.	.|.	.|.	.|.	.|.	.|.	.|.	.|.	.|.	.|.	.|.	25|25	.|.	.|.	.|.	.|.	.|.	.|.	.|.	.|.	.|.	.|.	.|.	25|25	.|.	.|.	.|.	.|.	.|.	.|.	.|.	.|.	.|.	.|.	.|.
chr12:217257-217287	30|30	30|30	.|.	.|.	.|.	.|.	.|.	.|.	.|.	.|.	.|.	.|.	.|.	.|.	.|.	.|.	.|.	.|.	.|.	.|.	.|.	.|.	.|.	.|.	.|.	30|30	.|.	.|.	.|.	.|.	.|.	.|.	.|.	.|.	.|.	.|.	.|.	.|.	.|.	30|30	.|.	.|.	.|.	.|.	.|.	.|.	.|.	.|.	.|.
chr12:22178617-22178655	.|.	.|.	.|.	.|.	.|.	.|.	.|.	.|.	.|.	34|36	.|.	.|.	.|.	.|.	.|.	.|.	.|.	.|.	.|.	.|.	.|.	.|.	.|.	.|.	.|.	.|.	.|.	.|.	.|.	.|.	.|.	.|.	.|.	.|.	.|.	.|.	.|.	.|.	.|.	.|.	.|.	.|.	.|.	.|.	.|.	.|.	.|.	.|.	.|.
chr12:22351456-22351502	.|.	.|.	.|.	.|.	.|.	40|42	.|.	.|.	38|40	.|.	38|40	.|.	.|.	.|.	34|38	38|40	40|42	.|.	.|.	40|42	.|.	.|.	42|42	.|.	.|.	.|.	.|.	.|.	.|.	.|.	.|.	.|.	.|.	.|.	.|.	40|42	40|42	.|.	.|.	.|.	.|.	.|.	.|.	.|.	.|.	.|.	.|.	.|.	.|.
chr12:23282808-23282836	.|.	26|26	.|.	.|.	.|.	.|.	.|.	.|.	.|.	.|.	.|.	.|.	.|.	.|.	.|.	.|.	.|.	28|30	.|.	.|.	28|30	.|.	.|.	.|.	.|.	.|.	.|.	.|.	.|.	.|.	28|30	.|.	28|30	.|.	.|.	.|.	.|.	.|.	.|.	.|.	30|30	.|.	.|.	28|30	.|.	.|.	.|.	28|30	.|.
chr12:23681751-23681779	28|24	28|28	.|.	24|24	.|.	24|24	28|28	24|24	.|.	.|.	.|.	28|24	24|24	.|.	28|28	.|.	.|.	.|.	.|.	.|.	.|.	.|.	.|.	.|.	.|.	.|.	.|.	.|.	.|.	.|.	28|28	.|.	28|28	24|24	.|.	.|.	20|24	24|24	28|24	.|.	28|24	24|24	24|24	.|.	.|.	28|28	24|24	28|24	24|24
chr12:24152074-24152110	.|.	.|.	.|.	.|.	32|34	.|.	.|.	34|36	.|.	34|36	.|.	.|.	.|.	.|.	.|.	.|.	.|.	.|.	.|.	.|.	34|36	.|.	.|.	34|36	34|36	.|.	.|.	.|.	34|34	.|.	.|.	.|.	.|.	.|.	32|36	.|.	.|.	.|.	32|34	.|.	.|.	.|.	.|.	.|.	.|.	.|.	.|.	34|36	.|.
chr12:24978045-24978069	.|.	.|.	.|.	.|.	.|.	.|.	.|.	18|18	.|.	.|.	.|.	.|.	.|.	.|.	.|.	.|.	.|.	.|.	.|.	.|.	.|.	.|.	.|.	.|.	20|18	.|.	.|.	.|.	.|.	.|.	.|.	.|.	.|.	.|.	.|.	18|18	.|.	.|.	.|.	.|.	18|20	.|.	.|.	.|.	.|.	.|.	.|.	.|.	.|.
chr12:25237474-25237502	.|.	.|.	.|.	28|30	.|.	.|.	.|.	.|.	.|.	.|.	.|.	28|30	.|.	.|.	.|.	.|.	.|.	.|.	.|.	.|.	.|.	.|.	.|.	.|.	.|.	.|.	.|.	.|.	30|30	.|.	28|30	.|.	.|.	.|.	.|.	.|.	.|.	.|.	.|.	.|.	.|.	.|.	.|.	.|.	.|.	.|.	.|.	.|.	.|.
chr12:25648183-25648217	.|.	.|.	.|.	.|.	.|.	.|.	.|.	.|.	.|.	.|.	.|.	.|.	.|.	.|.	.|.	42|42	.|.	.|.	.|.	46|48	.|.	.|.	.|.	.|.	.|.	.|.	.|.	.|.	52|56	.|.	.|.	.|.	.|.	.|.	.|.	.|.	44|46	.|.	.|.	.|.	.|.	.|.	46|46	.|.	.|.	.|.	.|.	.|.	.|.
chr12:25670641-25670680	.|.	.|.	.|.	.|.	.|.	.|.	.|.	.|.	.|.	.|.	.|.	.|.	.|.	.|.	.|.	.|.	.|.	.|.	.|.	.|.	.|.	.|.	.|.	.|.	.|.	.|.	.|.	.|.	.|.	.|.	.|.	.|.	.|.	.|.	.|.	.|.	.|.	.|.	.|.	.|.	.|.	.|.	.|.	.|.	.|.	.|.	.|.	.|.	.|.
chr12:25872986-25873016	.|.	46|48	.|.	46|50	.|.	.|.	.|.	.|.	.|.	.|.	.|.	46|48	.|.	.|.	.|.	46|48	.|.	.|.	.|.	.|.	.|.	.|.	.|.	.|.	.|.	.|.	.|.	46|48	.|.	.|.	.|.	.|.	50|52	.|.	.|.	.|.	.|.	.|.	.|.	.|.	.|.	.|.	.|.	.|.	.|.	.|.	.|.	.|.	.|.
chr12:26210033-26210059	.|.	.|.	.|.	.|.	.|.	28|28	.|.	.|.	.|.	.|.	.|.	36|36	.|.	.|.	.|.	.|.	.|.	.|.	.|.	36|36	.|.	.|.	.|.	.|.	.|.	.|.	.|.	.|.	28|28	.|.	.|.	.|.	.|.	.|.	.|.	.|.	.|.	.|.	.|.	.|.	.|.	.|.	.|.	.|.	.|.	.|.	.|.	.|.	.|.
chr12:26233375-26233413	.|.	.|.	.|.	38|38	.|.	.|.	.|.	.|.	.|.	.|.	.|.	.|.	.|.	.|.	.|.	42|42	.|.	.|.	.|.	42|42	.|.	.|.	38|40	.|.	.|.	.|.	.|.	.|.	.|.	.|.	.|.	.|.	.|.	.|.	.|.	38|36	.|.	.|.	.|.	.|.	.|.	38|38	.|.	38|38	.|.	40|40	.|.	.|.	.|.
chr12:26662891-26662937	.|.	.|.	.|.	.|.	.|.	.|.	.|.	.|.	.|.	.|.	.|.	.|.	.|.	.|.	.|.	.|.	.|.	.|.	.|.	.|.	.|.	.|.	.|.	.|.	.|.	.|.	.|.	.|.	.|.	.|.	.|.	.|.	.|.	.|.	.|.	.|.	.|.	.|.	.|.	.|.	.|.	.|.	.|.	.|.	.|.	.|.	.|.	.|.	.|.
chr12:26865567-26865607	.|.	.|.	.|.	.|.	.|.	.|.	20|20	.|.	.|.	.|.	.|.	.|.	.|.	.|.	.|.	20|20	.|.	.|.	.|.	24|24	.|.	24|24	.|.	.|.	.|.	24|24	.|.	.|.	.|.	.|.	.|.	.|.	.|.	.|.	.|.	.|.	.|.	.|.	.|.	.|.	.|.	.|.	24|24	.|.	.|.	.|.	.|.	.|.	.|.
chr12:26899755-26899781	.|.	28|28	.|.	.|.	.|.	.|.	28|28	.|.	.|.	.|.	.|.	.|.	.|.	28|28	.|.	.|.	.|.	.|.	.|.	.|.	28|28	.|.	28|28	.|.	.|.	.|.	.|.	.|.	.|.	.|.	.|.	.|.	.|.	.|.	.|.	.|.	28|28	.|.	.|.	.|.	.|.	.|.	.|.	.|.	.|.	.|.	.|.	.|.	.|.
chr12:26943519-26943551	44|46	.|.	.|.	.|.	.|.	.|.	.|.	.|.	.|.	.|.	.|.	.|.	.|.	.|.	.|.	.|.	.|.	.|.	.|.	.|.	.|.	.|.	.|.	.|.	.|.	.|.	.|.	.|.	.|.	.|.	.|.	.|.	.|.	.|.	.|.	.|.	.|.	.|.	.|.	.|.	.|.	.|.	.|.	.|.	.|.	42|46	.|.	.|.	.|.
chr12:28403886-28403922	.|.	.|.	.|.	.|.	.|.	.|.	.|.	.|.	.|.	.|.	.|.	.|.	.|.	.|.	.|.	.|.	.|.	.|.	.|.	.|.	.|.	.|.	.|.	.|.	.|.	.|.	.|.	32|34	.|.	.|.	.|.	.|.	.|.	.|.	30|34	.|.	.|.	.|.	.|.	.|.	.|.	.|.	.|.	30|32	.|.	.|.	.|.	.|.	.|.
chr12:28568597-28568621	.|.	.|.	.|.	.|.	.|.	.|.	.|.	.|.	.|.	.|.	.|.	.|.	.|.	.|.	.|.	.|.	22|22	.|.	.|.	.|.	22|22	.|.	22|22	.|.	.|.	.|.	.|.	.|.	.|.	.|.	.|.	.|.	.|.	.|.	.|.	.|.	.|.	.|.	.|.	.|.	.|.	.|.	.|.	.|.	.|.	.|.	.|.	.|.	.|.
chr12:28752072-28752120	.|.	.|.	.|.	.|.	.|.	.|.	.|.	.|.	32|34	.|.	.|.	.|.	.|.	.|.	.|.	48|46	48|48	.|.	.|.	.|.	.|.	.|.	.|.	.|.	.|.	48|44	48|48	.|.	48|48	.|.	.|.	.|.	.|.	.|.	.|.	48|46	48|46	.|.	.|.	30|32	34|36	.|.	.|.	.|.	.|.	.|.	46|46	.|.	.|.
chr12:28788454-28788478	.|.	.|.	.|.	.|.	.|.	.|.	.|.	.|.	.|.	.|.	.|.	.|.	.|.	.|.	.|.	.|.	.|.	.|.	30|30	.|.	30|30	.|.	.|.	.|.	.|.	.|.	.|.	.|.	.|.	.|.	.|.	.|.	.|.	.|.	.|.	36|36	.|.	.|.	.|.	.|.	.|.	.|.	.|.	.|.	.|.	.|.	.|.	.|.	.|.
chr12:28871535-28871575	46|46	.|.	.|.	.|.	.|.	.|.	.|.	.|.	.|.	.|.	.|.	.|.	.|.	.|.	.|.	.|.	.|.	.|.	.|.	.|.	.|.	.|.	.|.	.|.	.|.	.|.	.|.	.|.	.|.	.|.	.|.	.|.	.|.	.|.	.|.	.|.	.|.	.|.	.|.	.|.	.|.	.|.	.|.	.|.	.|.	.|.	.|.	.|.	.|.
chr12:2896806-2896832	.|.	.|.	.|.	.|.	.|.	.|.	.|.	.|.	.|.	.|.	.|.	.|.	.|.	.|.	.|.	.|.	.|.	.|.	.|.	.|.	.|.	.|.	.|.	.|.	.|.	.|.	.|.	.|.	.|.	.|.	.|.	.|.	.|.	.|.	.|.	.|.	.|.	.|.	.|.	.|.	.|.	.|.	.|.	.|.	.|.	.|.	.|.	24|24	.|.
chr12:29176186-29176214	.|.	26|26	.|.	26|26	.|.	.|.	.|.	.|.	.|.	.|.	38|40	26|26	.|.	26|26	.|.	.|.	.|.	.|.	.|.	.|.	.|.	.|.	.|.	.|.	.|.	.|.	.|.	26|26	26|26	.|.	.|.	.|.	.|.	.|.	.|.	.|.	.|.	.|.	.|.	.|.	.|.	.|.	.|.	.|.	.|.	.|.	.|.	38|40	.|.
chr12:29392385-29392415	.|.	.|.	.|.	.|.	.|.	.|.	.|.	.|.	.|.	.|.	.|.	.|.	.|.	.|.	.|.	.|.	.|.	.|.	.|.	.|.	.|.	.|.	.|.	.|.	.|.	.|.	.|.	.|.	.|.	.|.	30|30	.|.	.|.	.|.	.|.	34|36	.|.	.|.	.|.	.|.	.|.	.|.	.|.	.|.	.|.	.|.	.|.	.|.	.|.
chr12:29396935-29396963	.|.	.|.	.|.	.|.	.|.	.|.	.|.	.|.	.|.	.|.	.|.	.|.	.|.	.|.	.|.	.|.	.|.	.|.	.|.	.|.	.|.	.|.	.|.	.|.	.|.	28|28	.|.	.|.	.|.	.|.	.|.	.|.	.|.	.|.	.|.	.|.	28|28	.|.	.|.	.|.	.|.	.|.	.|.	.|.	28|28	.|.	.|.	.|.	.|.
chr12:29602209-29602253	.|.	26|30	.|.	.|.	.|.	.|.	.|.	.|.	.|.	.|.	.|.	30|30	.|.	.|.	.|.	.|.	.|.	.|.	.|.	.|.	.|.	.|.	.|.	.|.	.|.	.|.	.|.	.|.	.|.	.|.	.|.	.|.	.|.	.|.	.|.	.|.	.|.	.|.	.|.	.|.	.|.	.|.	.|.	.|.	.|.	.|.	.|.	.|.	.|.
chr12:29675487-29675519	.|.	26|26	26|26	.|.	26|26	.|.	.|.	.|.	24|24	.|.	.|.	.|.	26|26	26|28	.|.	.|.	.|.	.|.	.|.	.|.	.|.	.|.	.|.	.|.	.|.	24|26	.|.	.|.	.|.	.|.	.|.	26|26	.|.	.|.	.|.	.|.	.|.	24|24	.|.	.|.	.|.	.|.	26|26	.|.	.|.	24|24	.|.	26|26	26|28
chr12:30146227-30146253	24|24	.|.	.|.	.|.	.|.	.|.	.|.	.|.	.|.	.|.	.|.	26|26	.|.	.|.	.|.	.|.	.|.	.|.	.|.	.|.	.|.	.|.	.|.	.|.	.|.	.|.	.|.	.|.	.|.	.|.	.|.	.|.	26|26	.|.	.|.	.|.	.|.	.|.	.|.	.|.	.|.	.|.	.|.	.|.	26|26	.|.	.|.	.|.	.|.
chr12:32320941-32320971	.|.	28|28	.|.	.|.	.|.	.|.	.|.	.|.	.|.	.|.	.|.	.|.	.|.	.|.	28|28	.|.	.|.	28|28	.|.	28|28	.|.	.|.	.|.	28|28	.|.	26|28	28|28	28|28	.|.	.|.	.|.	26|28	26|28	28|28	.|.	28|28	26|28	.|.	.|.	28|28	28|28	26|28	.|.	28|28	.|.	28|28	28|28	.|.	26|28
chr12:3769995-3770053	.|.	.|.	.|.	.|.	.|.	.|.	.|.	.|.	.|.	.|.	.|.	.|.	.|.	.|.	.|.	.|.	.|.	.|.	.|.	.|.	.|.	.|.	.|.	.|.	.|.	.|.	.|.	.|.	.|.	.|.	.|.	.|.	.|.	.|.	.|.	.|.	.|.	.|.	.|.	.|.	.|.	.|.	.|.	46|48	.|.	.|.	44|48	.|.	.|.
chr12:38995649-38995673	.|.	.|.	26|26	.|.	.|.	.|.	.|.	.|.	.|.	.|.	.|.	.|.	.|.	.|.	.|.	.|.	.|.	.|.	.|.	.|.	.|.	.|.	.|.	.|.	.|.	.|.	.|.	32|34	.|.	.|.	.|.	.|.	.|.	24|26	.|.	.|.	.|.	24|26	.|.	.|.	.|.	.|.	.|.	.|.	32|36	.|.	.|.	.|.	.|.
chr12:39317458-39317484	.|.	.|.	.|.	.|.	.|.	.|.	.|.	.|.	.|.	.|.	.|.	.|.	.|.	.|.	.|.	26|26	.|.	.|.	.|.	.|.	.|.	.|.	.|.	.|.	.|.	26|24	.|.	26|26	.|.	.|.	26|24	.|.	.|.	.|.	.|.	.|.	26|28	.|.	.|.	.|.	.|.	.|.	.|.	.|.	.|.	.|.	.|.	.|.	.|.
chr12:39452628-39452662	.|.	.|.	.|.	.|.	.|.	.|.	.|.	.|.	26|26	.|.	.|.	.|.	22|26	24|24	24|26	.|.	.|.	.|.	.|.	26|26	.|.	.|.	26|28	.|.	.|.	26|26	24|26	.|.	26|26	.|.	.|.	26|26	24|24	.|.	26|28	.|.	.|.	.|.	26|26	.|.	26|26	.|.	.|.	26|26	.|.	26|26	.|.	26|26	.|.
chr12:39532681-39532721	.|.	.|.	.|.	40|38	.|.	38|42	28|28	.|.	.|.	.|.	.|.	.|.	.|.	.|.	.|.	.|.	.|.	28|28	.|.	28|28	28|28	.|.	40|42	.|.	28|42	.|.	.|.	.|.	.|.	.|.	40|38	.|.	38|42	.|.	.|.	.|.	.|.	40|42	.|.	.|.	38|42	.|.	.|.	.|.	.|.	28|42	.|.	.|.	.|.
chr12:39844138-39844164	22|22	.|.	.|.	.|.	.|.	.|.	.|.	.|.	.|.	.|.	.|.	.|.	.|.	.|.	.|.	.|.	.|.	.|.	.|.	.|.	.|.	.|.	.|.	22|24	.|.	.|.	22|22	.|.	.|.	.|.	22|22	.|.	.|.	.|.	.|.	22|24	.|.	.|.	.|.	.|.	.|.	.|.	.|.	.|.	.|.	.|.	.|.	.|.	.|.
chr12:40126871-40126897	40|42	.|.	.|.	.|.	.|.	.|.	.|.	.|.	26|26	.|.	40|40	26|40	26|26	26|26	26|26	.|.	.|.	.|.	.|.	38|40	38|40	38|40	.|.	.|.	.|.	26|40	26|26	.|.	26|26	.|.	.|.	.|.	26|26	26|26	.|.	26|26	.|.	.|.	38|42	26|40	26|40	.|.	26|26	26|26	.|.	26|40	.|.	.|.	.|.
chr12:40631625-40631649	.|.	20|20	.|.	.|.	.|.	.|.	.|.	.|.	.|.	.|.	.|.	.|.	.|.	20|20	.|.	.|.	.|.	.|.	.|.	24|24	.|.	.|.	.|.	.|.	.|.	.|.	.|.	.|.	.|.	.|.	.|.	.|.	.|.	24|24	.|.	.|.	.|.	.|.	.|.	.|.	.|.	.|.	.|.	.|.	.|.	.|.	.|.	.|.	.|.
chr12:41100848-41100890	.|.	22|24	.|.	.|.	22|24	.|.	.|.	.|.	.|.	22|24	.|.	.|.	.|.	28|26	28|26	22|24	.|.	22|24	.|.	28|30	.|.	.|.	30|30	24|24	22|24	22|24	22|24	.|.	24|30	.|.	.|.	.|.	.|.	22|30	.|.	.|.	28|30	.|.	24|20	.|.	.|.	22|24	28|30	22|20	.|.	22|24	24|30	.|.	.|.
chr12:41266014-41266062	.|.	.|.	.|.	.|.	48|44	.|.	.|.	.|.	.|.	.|.	.|.	.|.	.|.	.|.	.|.	.|.	.|.	.|.	.|.	.|.	.|.	.|.	.|.	.|.	.|.	.|.	.|.	.|.	32|34	.|.	.|.	.|.	.|.	.|.	.|.	.|.	.|.	.|.	.|.	.|.	.|.	30|30	.|.	.|.	.|.	.|.	.|.	.|.	.|.
chr12:41341584-41341630	.|.	.|.	.|.	.|.	.|.	.|.	.|.	.|.	.|.	.|.	.|.	.|.	.|.	.|.	.|.	.|.	.|.	.|.	.|.	.|.	.|.	.|.	.|.	.|.	46|48	.|.	.|.	.|.	.|.	.|.	.|.	.|.	.|.	.|.	.|.	.|.	.|.	.|.	.|.	.|.	.|.	.|.	.|.	.|.	.|.	.|.	.|.	.|.	.|.
chr12:41358327-41358361	.|.	.|.	.|.	.|.	.|.	.|.	.|.	.|.	.|.	.|.	.|.	.|.	.|.	.|.	26|26	.|.	.|.	.|.	.|.	.|.	.|.	.|.	38|38	.|.	.|.	.|.	.|.	.|.	.|.	.|.	24|26	.|.	.|.	.|.	36|38	.|.	.|.	.|.	.|.	.|.	26|26	.|.	.|.	.|.	.|.	.|.	.|.	.|.	.|.
chr12:41458571-41458603	.|.	.|.	.|.	.|.	.|.	.|.	.|.	.|.	28|36	.|.	.|.	40|40	.|.	.|.	.|.	.|.	.|.	40|40	.|.	.|.	.|.	.|.	.|.	.|.	.|.	32|40	32|40	40|40	.|.	.|.	32|40	.|.	32|32	40|40	.|.	.|.	.|.	.|.	.|.	.|.	.|.	40|40	.|.	40|40	.|.	.|.	40|40	.|.	32|40
chr12:41914421-41914465	.|.	24|24	.|.	.|.	.|.	.|.	.|.	.|.	.|.	.|.	.|.	34|36	.|.	.|.	.|.	.|.	.|.	.|.	.|.	.|.	.|.	.|.	.|.	.|.	34|36	.|.	22|22	22|22	22|22	.|.	.|.	.|.	.|.	.|.	.|.	.|.	.|.	.|.	.|.	.|.	.|.	.|.	.|.	22|22	.|.	.|.	.|.	.|.	.|.
chr12:42098656-42098680	.|.	24|24	.|.	24|24	.|.	.|.	.|.	.|.	24|24	.|.	.|.	.|.	.|.	.|.	.|.	.|.	24|24	.|.	.|.	24|24	24|24	.|.	.|.	24|24	.|.	24|24	24|24	.|.	.|.	.|.	24|24	.|.	.|.	.|.	.|.	.|.	24|24	24|24	.|.	.|.	24|24	.|.	.|.	24|24	.|.	.|.	24|20	.|.	.|.
chr12:4222051-4222079	.|.	28|28	28|28	28|28	.|.	.|.	.|.	.|.	.|.	.|.	28|28	.|.	.|.	.|.	.|.	.|.	.|.	.|.	.|.	.|.	28|28	.|.	.|.	28|28	28|28	.|.	.|.	.|.	.|.	.|.	.|.	.|.	.|.	.|.	.|.	.|.	.|.	.|.	.|.	.|.	.|.	.|.	.|.	.|.	.|.	.|.	.|.	.|.	.|.
chr12:42243436-42243460	27|27	24|27	.|.	.|.	27|27	.|.	.|.	24|24	24|27	24|27	.|.	24|24	.|.	.|.	24|27	24|27	.|.	24|24	24|27	27|27	24|27	27|27	24|24	27|27	24|27	27|27	24|27	24|24	21|21	27|27	27|27	.|.	27|27	.|.	24|27	24|27	24|27	24|24	24|27	27|27	24|27	24|27	24|27	24|27	24|27	24|27	24|27	24|24	24|27
chr12:42327347-42327389	.|.	.|.	.|.	.|.	.|.	.|.	.|.	.|.	.|.	.|.	.|.	.|.	.|.	.|.	.|.	26|26	.|.	.|.	.|.	.|.	.|.	.|.	.|.	.|.	.|.	.|.	.|.	.|.	.|.	.|.	.|.	.|.	.|.	.|.	.|.	.|.	.|.	.|.	.|.	.|.	.|.	.|.	.|.	.|.	.|.	.|.	.|.	.|.	.|.
chr12:42617133-42617157	.|.	.|.	.|.	.|.	.|.	.|.	.|.	.|.	.|.	.|.	.|.	.|.	.|.	.|.	.|.	.|.	.|.	.|.	.|.	.|.	.|.	.|.	.|.	.|.	.|.	.|.	.|.	.|.	.|.	18|18	.|.	.|.	.|.	.|.	.|.	.|.	.|.	.|.	.|.	.|.	22|22	.|.	.|.	.|.	.|.	.|.	.|.	.|.	.|.
chr12:42655991-42656017	.|.	.|.	.|.	.|.	.|.	.|.	.|.	22|22	.|.	.|.	.|.	.|.	.|.	.|.	.|.	.|.	.|.	.|.	.|.	.|.	.|.	.|.	.|.	.|.	.|.	24|24	.|.	.|.	22|22	.|.	.|.	.|.	.|.	.|.	.|.	24|24	24|24	.|.	.|.	.|.	.|.	.|.	.|.	.|.	.|.	.|.	.|.	.|.	.|.
chr12:42771892-42771952	.|.	.|.	.|.	.|.	.|.	.|.	.|.	.|.	.|.	.|.	.|.	.|.	.|.	.|.	48|48	.|.	.|.	.|.	.|.	.|.	40|40	.|.	.|.	.|.	.|.	.|.	.|.	.|.	.|.	.|.	.|.	.|.	.|.	.|.	.|.	.|.	48|48	.|.	.|.	.|.	.|.	.|.	.|.	.|.	.|.	.|.	.|.	.|.	.|.
chr12:42954570-42954620	.|.	.|.	.|.	.|.	.|.	.|.	.|.	.|.	.|.	.|.	.|.	.|.	.|.	.|.	.|.	.|.	.|.	.|.	.|.	.|.	.|.	.|.	.|.	.|.	.|.	.|.	.|.	.|.	22|22	.|.	.|.	.|.	.|.	.|.	.|.	.|.	.|.	.|.	.|.	26|26	.|.	.|.	.|.	.|.	.|.	.|.	.|.	.|.	.|.
chr12:43402322-43402354	.|.	.|.	.|.	.|.	.|.	.|.	.|.	.|.	.|.	.|.	.|.	.|.	.|.	38|40	.|.	.|.	36|38	.|.	.|.	.|.	.|.	.|.	.|.	.|.	.|.	.|.	.|.	.|.	.|.	.|.	.|.	.|.	.|.	.|.	.|.	.|.	.|.	.|.	.|.	.|.	.|.	.|.	.|.	.|.	36|38	.|.	.|.	.|.	.|.
chr12:44081967-44082001	.|.	.|.	.|.	.|.	.|.	.|.	.|.	.|.	.|.	.|.	.|.	38|40	.|.	.|.	.|.	.|.	.|.	.|.	.|.	40|44	.|.	.|.	.|.	.|.	.|.	.|.	.|.	36|42	.|.	.|.	.|.	.|.	.|.	.|.	.|.	.|.	.|.	42|42	.|.	36|44	.|.	34|36	.|.	.|.	.|.	.|.	.|.	.|.	.|.
chr12:44436564-44436612	.|.	.|.	.|.	.|.	.|.	.|.	.|.	.|.	.|.	.|.	.|.	.|.	.|.	.|.	.|.	.|.	.|.	.|.	44|44	44|58	58|60	.|.	.|.	42|44	44|44	.|.	.|.	.|.	.|.	.|.	.|.	.|.	.|.	46|46	.|.	.|.	.|.	.|.	.|.	.|.	.|.	.|.	.|.	46|46	.|.	46|46	.|.	46|56	.|.
chr12:44683008-44683048	.|.	.|.	.|.	.|.	.|.	.|.	.|.	.|.	.|.	.|.	.|.	.|.	.|.	.|.	.|.	30|30	.|.	.|.	.|.	.|.	.|.	.|.	.|.	.|.	.|.	.|.	.|.	.|.	.|.	.|.	.|.	.|.	.|.	.|.	.|.	.|.	.|.	.|.	.|.	.|.	.|.	.|.	.|.	.|.	.|.	.|.	.|.	.|.	.|.
chr12:44944329-44944373	.|.	44|44	.|.	.|.	.|.	.|.	.|.	.|.	.|.	44|44	44|44	.|.	.|.	.|.	.|.	.|.	.|.	.|.	.|.	48|48	.|.	.|.	44|44	.|.	.|.	.|.	48|48	.|.	44|44	.|.	44|44	.|.	.|.	.|.	.|.	48|48	.|.	.|.	44|44	44|44	.|.	44|44	48|48	.|.	44|44	44|44	.|.	.|.	48|48
chr12:45044536-45044568	32|32	.|.	.|.	.|.	.|.	.|.	32|32	32|32	.|.	.|.	.|.	.|.	.|.	.|.	.|.	32|32	.|.	.|.	.|.	.|.	.|.	.|.	.|.	.|.	.|.	.|.	.|.	.|.	32|32	.|.	32|32	.|.	32|32	32|32	.|.	.|.	.|.	.|.	32|32	.|.	.|.	32|32	.|.	32|32	32|32	.|.	32|32	.|.	.|.
chr12:45201113-45201139	.|.	.|.	.|.	.|.	.|.	.|.	.|.	.|.	.|.	.|.	.|.	22|22	.|.	.|.	.|.	.|.	.|.	.|.	.|.	.|.	.|.	.|.	22|22	.|.	.|.	.|.	.|.	.|.	.|.	.|.	18|18	.|.	18|18	.|.	.|.	.|.	18|18	.|.	.|.	.|.	.|.	.|.	.|.	22|22	.|.	.|.	.|.	.|.	18|18
chr12:45312300-45312348	.|.	.|.	.|.	.|.	.|.	.|.	.|.	.|.	.|.	54|56	.|.	52|52	.|.	54|56	.|.	54|56	.|.	.|.	.|.	50|56	.|.	.|.	50|52	.|.	.|.	.|.	52|56	.|.	52|56	.|.	.|.	.|.	.|.	.|.	.|.	.|.	.|.	.|.	.|.	.|.	.|.	.|.	.|.	54|56	.|.	.|.	.|.	.|.	.|.
chr12:46007821-46007849	.|.	28|28	.|.	.|.	.|.	.|.	.|.	.|.	.|.	.|.	.|.	.|.	.|.	.|.	.|.	.|.	.|.	.|.	.|.	.|.	.|.	.|.	.|.	.|.	.|.	28|28	.|.	.|.	28|28	.|.	.|.	.|.	.|.	.|.	.|.	.|.	28|28	.|.	.|.	.|.	.|.	.|.	.|.	28|28	28|28	.|.	.|.	.|.	.|.
chr12:4638062-4638104	.|.	.|.	.|.	.|.	.|.	.|.	.|.	.|.	.|.	.|.	.|.	.|.	.|.	.|.	.|.	.|.	.|.	.|.	.|.	.|.	.|.	.|.	.|.	.|.	.|.	.|.	42|62	42|60	.|.	.|.	.|.	.|.	.|.	.|.	.|.	.|.	.|.	.|.	60|62	.|.	.|.	.|.	.|.	.|.	.|.	.|.	.|.	.|.	.|.
chr12:46419432-46419472	38|38	34|36	.|.	40|36	34|36	.|.	34|36	.|.	40|38	.|.	.|.	40|38	.|.	.|.	36|38	40|38	.|.	.|.	.|.	.|.	.|.	40|38	34|36	.|.	40|36	40|38	40|38	.|.	.|.	.|.	.|.	.|.	36|38	.|.	.|.	40|36	36|38	40|36	36|38	.|.	36|38	40|38	.|.	.|.	.|.	.|.	.|.	.|.	.|.
chr12:46783217-46783247	.|.	.|.	.|.	.|.	.|.	.|.	26|28	.|.	.|.	.|.	.|.	.|.	.|.	.|.	.|.	.|.	.|.	.|.	.|.	.|.	.|.	.|.	24|26	26|28	.|.	24|28	24|26	24|26	26|28	.|.	26|28	26|28	.|.	.|.	.|.	.|.	24|26	.|.	.|.	.|.	.|.	.|.	.|.	.|.	.|.	24|28	26|26	.|.	.|.
chr12:46829976-46830006	.|.	.|.	.|.	.|.	.|.	.|.	.|.	.|.	.|.	.|.	.|.	.|.	.|.	.|.	.|.	.|.	.|.	.|.	.|.	.|.	.|.	.|.	.|.	.|.	.|.	.|.	.|.	.|.	.|.	.|.	.|.	.|.	.|.	.|.	.|.	.|.	.|.	.|.	.|.	.|.	.|.	.|.	.|.	.|.	.|.	.|.	.|.	.|.	.|.
chr12:46970033-46970061	.|.	30|30	.|.	.|.	.|.	.|.	.|.	.|.	.|.	.|.	.|.	.|.	.|.	.|.	28|30	.|.	24|24	.|.	.|.	.|.	.|.	.|.	.|.	.|.	22|24	.|.	.|.	.|.	.|.	.|.	.|.	.|.	.|.	.|.	.|.	.|.	.|.	.|.	.|.	.|.	.|.	.|.	.|.	.|.	.|.	.|.	.|.	.|.	.|.
chr12:47026215-47026242	.|.	.|.	.|.	.|.	.|.	.|.	.|.	.|.	.|.	.|.	.|.	.|.	39|39	.|.	.|.	.|.	.|.	.|.	.|.	.|.	.|.	.|.	.|.	.|.	33|33	.|.	.|.	.|.	.|.	.|.	39|39	.|.	.|.	.|.	.|.	.|.	.|.	.|.	.|.	.|.	.|.	.|.	.|.	.|.	.|.	.|.	.|.	.|.	.|.
chr12:48031853-48031889	.|.	.|.	.|.	.|.	.|.	.|.	.|.	.|.	.|.	.|.	.|.	.|.	.|.	.|.	.|.	.|.	.|.	.|.	.|.	.|.	.|.	.|.	.|.	.|.	.|.	.|.	.|.	.|.	.|.	.|.	.|.	.|.	.|.	.|.	.|.	.|.	.|.	.|.	.|.	.|.	.|.	.|.	.|.	.|.	.|.	.|.	.|.	.|.	.|.
chr12:4806919-4806967	.|.	.|.	36|36	.|.	.|.	46|48	.|.	.|.	.|.	.|.	.|.	.|.	.|.	.|.	.|.	36|48	.|.	.|.	.|.	36|32	.|.	.|.	48|44	.|.	.|.	.|.	.|.	.|.	48|50	.|.	.|.	46|48	34|36	.|.	.|.	.|.	.|.	48|44	.|.	.|.	36|36	48|48	.|.	38|48	36|48	.|.	48|44	48|44	.|.
chr12:48590294-48590318	.|.	.|.	.|.	.|.	.|.	.|.	.|.	.|.	24|24	.|.	.|.	.|.	.|.	.|.	.|.	.|.	.|.	.|.	.|.	.|.	.|.	.|.	.|.	.|.	.|.	.|.	.|.	.|.	.|.	.|.	.|.	.|.	.|.	.|.	.|.	.|.	.|.	.|.	.|.	.|.	.|.	.|.	20|20	.|.	.|.	.|.	.|.	.|.	20|20
chr12:4968381-4968427	28|30	.|.	.|.	28|30	46|44	.|.	.|.	.|.	.|.	.|.	.|.	28|30	.|.	.|.	.|.	46|42	.|.	.|.	.|.	42|44	.|.	46|44	.|.	28|30	28|30	.|.	.|.	.|.	28|30	.|.	46|42	40|44	44|24	.|.	.|.	28|28	.|.	.|.	.|.	42|44	.|.	.|.	46|42	28|30	.|.	.|.	.|.	.|.	30|32
chr12:50607807-50607833	.|.	.|.	.|.	.|.	.|.	.|.	.|.	.|.	.|.	.|.	.|.	.|.	.|.	.|.	.|.	.|.	.|.	.|.	.|.	.|.	.|.	.|.	.|.	.|.	.|.	.|.	.|.	.|.	.|.	.|.	.|.	.|.	.|.	.|.	.|.	.|.	.|.	.|.	.|.	.|.	28|28	.|.	.|.	.|.	.|.	.|.	.|.	.|.	.|.
chr12:51885524-51885562	32|36	32|36	32|36	.|.	38|34	38|34	34|36	.|.	.|.	38|34	.|.	.|.	32|36	.|.	.|.	34|36	.|.	.|.	.|.	.|.	34|36	.|.	.|.	.|.	34|36	34|36	.|.	.|.	.|.	.|.	34|36	.|.	34|36	.|.	.|.	.|.	38|34	.|.	.|.	32|34	34|30	38|34	38|34	.|.	.|.	32|36	34|36	38|36	.|.
chr12:53370981-53371005	.|.	.|.	.|.	.|.	.|.	.|.	.|.	.|.	.|.	.|.	.|.	.|.	.|.	.|.	.|.	.|.	.|.	.|.	.|.	.|.	.|.	.|.	24|24	.|.	.|.	.|.	24|24	.|.	24|20	.|.	.|.	.|.	.|.	24|24	24|24	.|.	.|.	.|.	.|.	.|.	.|.	.|.	.|.	.|.	.|.	.|.	.|.	.|.	.|.
chr12:53544058-53544090	.|.	.|.	.|.	.|.	.|.	.|.	30|30	.|.	.|.	.|.	.|.	.|.	30|30	.|.	.|.	.|.	.|.	.|.	.|.	32|32	.|.	32|30	.|.	.|.	30|30	.|.	.|.	.|.	30|30	.|.	30|30	.|.	.|.	.|.	30|30	.|.	.|.	.|.	32|30	.|.	30|30	30|30	.|.	30|30	.|.	.|.	.|.	28|28	.|.
chr12:53606521-53606563	.|.	.|.	.|.	.|.	.|.	.|.	.|.	.|.	.|.	.|.	.|.	.|.	.|.	.|.	.|.	.|.	.|.	.|.	.|.	.|.	.|.	42|44	.|.	.|.	42|40	.|.	.|.	.|.	34|34	.|.	.|.	.|.	42|44	.|.	.|.	.|.	.|.	.|.	.|.	.|.	.|.	.|.	.|.	.|.	.|.	.|.	.|.	.|.	.|.
chr12:5478855-5478881	.|.	.|.	.|.	.|.	.|.	.|.	.|.	.|.	.|.	.|.	.|.	.|.	.|.	.|.	.|.	.|.	.|.	.|.	.|.	.|.	.|.	.|.	.|.	.|.	.|.	.|.	.|.	.|.	.|.	.|.	.|.	.|.	.|.	.|.	.|.	.|.	.|.	.|.	26|24	.|.	.|.	.|.	.|.	.|.	.|.	.|.	.|.	.|.	.|.
chr12:54817953-54817981	.|.	.|.	.|.	.|.	.|.	.|.	28|28	.|.	.|.	.|.	.|.	28|28	.|.	.|.	.|.	.|.	.|.	.|.	.|.	.|.	.|.	.|.	24|24	.|.	.|.	.|.	.|.	.|.	.|.	.|.	.|.	.|.	.|.	.|.	.|.	.|.	.|.	.|.	.|.	.|.	24|24	.|.	.|.	.|.	.|.	.|.	.|.	.|.	.|.
chr12:5490858-5490892	28|28	.|.	.|.	22|24	20|22	.|.	.|.	28|28	.|.	.|.	26|26	28|28	28|28	28|28	24|24	24|24	.|.	.|.	.|.	24|28	24|28	24|28	.|.	.|.	24|24	22|24	24|28	24|24	22|24	.|.	28|28	.|.	24|28	22|24	.|.	24|28	.|.	22|24	22|24	22|24	24|28	24|28	24|28	24|28	.|.	24|28	24|28	.|.	24|28
chr12:5501637-5501664	.|.	.|.	.|.	.|.	.|.	.|.	.|.	.|.	.|.	.|.	.|.	.|.	27|27	.|.	.|.	.|.	.|.	.|.	.|.	.|.	.|.	.|.	.|.	.|.	.|.	.|.	27|27	.|.	.|.	.|.	.|.	.|.	.|.	.|.	.|.	.|.	.|.	.|.	.|.	.|.	.|.	.|.	.|.	.|.	.|.	.|.	.|.	.|.	.|.
chr12:5512160-5512196	.|.	.|.	.|.	.|.	.|.	.|.	.|.	.|.	40|44	.|.	.|.	.|.	.|.	.|.	.|.	.|.	.|.	.|.	.|.	38|42	.|.	.|.	40|42	.|.	34|38	.|.	.|.	34|38	40|42	.|.	36|38	.|.	.|.	.|.	.|.	.|.	40|42	.|.	.|.	36|38	36|42	36|40	.|.	.|.	.|.	38|42	.|.	.|.	.|.
chr12:5522432-5522472	.|.	.|.	.|.	42|44	.|.	.|.	.|.	.|.	.|.	.|.	.|.	.|.	.|.	.|.	.|.	.|.	.|.	.|.	.|.	.|.	.|.	.|.	42|44	.|.	.|.	.|.	.|.	.|.	.|.	.|.	.|.	.|.	.|.	.|.	.|.	.|.	.|.	.|.	.|.	.|.	.|.	.|.	.|.	.|.	.|.	.|.	.|.	.|.	.|.
chr12:55444564-55444594	.|.	.|.	.|.	.|.	.|.	.|.	.|.	.|.	.|.	.|.	.|.	.|.	.|.	30|28	.|.	.|.	.|.	.|.	.|.	.|.	.|.	.|.	.|.	.|.	.|.	.|.	.|.	.|.	.|.	.|.	.|.	.|.	.|.	24|22	.|.	.|.	.|.	.|.	.|.	.|.	.|.	.|.	.|.	.|.	.|.	.|.	.|.	.|.	.|.
chr12:55459028-55459056	.|.	.|.	.|.	32|32	32|32	.|.	.|.	.|.	28|32	.|.	.|.	.|.	.|.	.|.	.|.	.|.	.|.	32|32	.|.	28|26	28|28	.|.	32|32	.|.	32|32	28|28	.|.	32|32	32|32	.|.	32|32	.|.	32|32	.|.	.|.	28|32	.|.	.|.	32|32	.|.	28|32	28|26	.|.	32|32	.|.	30|34	28|32	.|.	.|.
chr12:55709880-55709914	.|.	.|.	.|.	.|.	.|.	.|.	.|.	.|.	.|.	.|.	.|.	.|.	.|.	.|.	.|.	.|.	.|.	.|.	.|.	.|.	.|.	.|.	.|.	.|.	.|.	.|.	.|.	.|.	.|.	.|.	.|.	.|.	.|.	.|.	.|.	.|.	.|.	.|.	.|.	.|.	.|.	.|.	.|.	.|.	.|.	.|.	.|.	.|.	.|.
chr12:55970736-55970780	.|.	52|52	.|.	.|.	.|.	.|.	.|.	.|.	.|.	.|.	.|.	.|.	44|44	.|.	.|.	.|.	.|.	.|.	52|52	.|.	.|.	.|.	.|.	.|.	.|.	.|.	.|.	.|.	.|.	.|.	.|.	52|52	.|.	.|.	.|.	.|.	.|.	44|44	.|.	.|.	.|.	.|.	.|.	.|.	.|.	.|.	.|.	.|.	.|.
chr12:57156057-57156093	.|.	.|.	.|.	.|.	.|.	.|.	.|.	.|.	.|.	.|.	.|.	.|.	.|.	.|.	.|.	.|.	.|.	.|.	.|.	.|.	.|.	.|.	.|.	.|.	.|.	.|.	.|.	.|.	.|.	.|.	.|.	.|.	.|.	.|.	.|.	.|.	.|.	.|.	.|.	.|.	.|.	.|.	.|.	.|.	.|.	.|.	.|.	.|.	.|.
chr12:5744765-5744795	.|.	.|.	.|.	.|.	36|38	.|.	.|.	.|.	.|.	.|.	.|.	.|.	.|.	.|.	.|.	.|.	.|.	.|.	.|.	38|28	.|.	.|.	.|.	.|.	.|.	.|.	32|32	.|.	.|.	.|.	.|.	32|32	.|.	.|.	.|.	.|.	.|.	.|.	.|.	36|38	.|.	36|36	.|.	.|.	.|.	.|.	.|.	.|.	.|.
chr12:57770861-57770889	.|.	.|.	.|.	.|.	.|.	.|.	.|.	.|.	.|.	.|.	.|.	.|.	.|.	.|.	.|.	.|.	.|.	.|.	.|.	.|.	.|.	.|.	.|.	.|.	.|.	.|.	.|.	.|.	.|.	.|.	.|.	.|.	.|.	.|.	.|.	.|.	.|.	.|.	.|.	.|.	.|.	.|.	.|.	.|.	.|.	.|.	.|.	.|.	.|.
chr12:58604722-58604746	.|.	24|24	.|.	.|.	.|.	.|.	.|.	.|.	.|.	.|.	.|.	.|.	.|.	.|.	.|.	.|.	.|.	.|.	.|.	.|.	.|.	.|.	.|.	.|.	.|.	.|.	.|.	.|.	24|22	.|.	.|.	.|.	.|.	.|.	.|.	.|.	.|.	.|.	.|.	24|24	.|.	.|.	.|.	.|.	.|.	.|.	.|.	.|.	.|.
chr12:58944465-58944489	.|.	.|.	.|.	24|24	.|.	.|.	.|.	.|.	.|.	.|.	.|.	.|.	.|.	24|24	.|.	.|.	.|.	.|.	.|.	.|.	.|.	.|.	.|.	.|.	.|.	.|.	.|.	.|.	24|24	.|.	.|.	.|.	24|24	.|.	24|24	.|.	.|.	.|.	.|.	24|24	24|24	.|.	.|.	.|.	.|.	.|.	.|.	.|.	.|.
chr12:58959186-58959210	.|.	.|.	.|.	24|24	.|.	.|.	.|.	.|.	.|.	.|.	.|.	.|.	.|.	.|.	.|.	.|.	.|.	.|.	.|.	.|.	.|.	.|.	.|.	.|.	.|.	.|.	.|.	.|.	.|.	.|.	.|.	.|.	.|.	.|.	.|.	.|.	.|.	.|.	.|.	.|.	.|.	.|.	.|.	.|.	.|.	.|.	.|.	.|.	.|.
chr12:59013493-59013527	.|.	34|40	36|38	34|32	36|40	.|.	.|.	34|36	34|32	36|40	34|32	.|.	.|.	.|.	34|32	.|.	.|.	.|.	.|.	.|.	.|.	.|.	.|.	.|.	36|38	.|.	.|.	.|.	.|.	.|.	.|.	.|.	.|.	.|.	34|34	34|32	.|.	.|.	.|.	34|32	34|40	.|.	34|34	.|.	.|.	.|.	.|.	.|.	34|40
chr12:59524660-59524688	.|.	.|.	.|.	.|.	24|24	24|24	24|24	.|.	22|24	.|.	.|.	24|24	24|24	24|24	24|24	.|.	.|.	.|.	.|.	22|24	.|.	24|24	.|.	.|.	24|24	.|.	.|.	.|.	.|.	.|.	24|24	.|.	24|24	.|.	.|.	.|.	22|22	.|.	24|24	24|24	24|24	24|24	.|.	24|24	.|.	.|.	24|24	24|24	.|.
chr12:60287774-60287812	.|.	.|.	.|.	.|.	.|.	26|28	.|.	26|28	.|.	.|.	.|.	.|.	.|.	.|.	.|.	.|.	.|.	.|.	.|.	38|28	26|28	36|40	.|.	26|36	.|.	38|26	26|28	.|.	.|.	26|28	28|24	.|.	.|.	.|.	26|28	.|.	.|.	.|.	.|.	26|28	.|.	.|.	26|36	28|28	28|24	.|.	.|.	26|24	.|.
chr12:60791819-60791855	.|.	.|.	.|.	.|.	.|.	.|.	.|.	.|.	.|.	.|.	.|.	.|.	.|.	.|.	.|.	.|.	.|.	.|.	.|.	.|.	.|.	.|.	.|.	.|.	.|.	.|.	.|.	.|.	36|38	.|.	.|.	.|.	.|.	.|.	.|.	28|28	.|.	.|.	.|.	.|.	.|.	.|.	.|.	.|.	.|.	.|.	.|.	.|.	.|.
chr12:60889411-60889447	.|.	.|.	.|.	.|.	.|.	.|.	.|.	.|.	.|.	.|.	.|.	.|.	.|.	36|36	.|.	.|.	.|.	.|.	.|.	.|.	.|.	.|.	.|.	.|.	.|.	.|.	.|.	.|.	.|.	.|.	.|.	.|.	.|.	.|.	.|.	.|.	.|.	.|.	.|.	.|.	.|.	.|.	.|.	.|.	.|.	.|.	.|.	.|.	.|.
chr12:60968342-60968384	.|.	30|30	.|.	.|.	30|30	.|.	.|.	42|40	.|.	.|.	.|.	.|.	42|40	.|.	.|.	.|.	.|.	.|.	.|.	.|.	.|.	.|.	.|.	.|.	.|.	.|.	.|.	.|.	.|.	.|.	.|.	.|.	.|.	.|.	.|.	.|.	.|.	.|.	.|.	.|.	.|.	.|.	.|.	.|.	.|.	.|.	.|.	.|.	.|.
chr12:61662408-61662436	.|.	.|.	.|.	.|.	.|.	.|.	.|.	28|28	.|.	.|.	.|.	28|28	.|.	.|.	.|.	.|.	.|.	.|.	.|.	.|.	24|24	.|.	28|28	20|24	28|28	.|.	28|24	28|28	.|.	28|28	.|.	.|.	28|28	.|.	.|.	.|.	28|28	.|.	.|.	28|28	28|28	.|.	.|.	.|.	.|.	.|.	.|.	28|28	.|.
chr12:61670413-61670445	.|.	.|.	.|.	.|.	.|.	.|.	.|.	.|.	.|.	.|.	.|.	.|.	.|.	.|.	.|.	.|.	36|40	.|.	.|.	.|.	.|.	.|.	.|.	.|.	38|40	.|.	28|28	.|.	.|.	.|.	.|.	.|.	.|.	.|.	.|.	.|.	.|.	.|.	.|.	.|.	.|.	.|.	.|.	.|.	.|.	.|.	.|.	.|.	.|.
chr12:62132071-62132109	.|.	38|38	.|.	.|.	.|.	.|.	.|.	50|52	50|52	.|.	.|.	.|.	.|.	.|.	.|.	.|.	.|.	.|.	.|.	50|52	.|.	.|.	.|.	.|.	.|.	.|.	.|.	.|.	.|.	.|.	48|48	.|.	.|.	.|.	.|.	.|.	.|.	.|.	.|.	.|.	.|.	.|.	.|.	.|.	.|.	.|.	.|.	.|.	.|.
chr12:62220119-62220143	.|.	.|.	.|.	.|.	.|.	.|.	.|.	26|28	.|.	.|.	.|.	.|.	.|.	.|.	.|.	.|.	.|.	.|.	.|.	.|.	.|.	.|.	.|.	.|.	.|.	.|.	.|.	.|.	.|.	.|.	.|.	.|.	.|.	.|.	.|.	.|.	20|22	26|28	.|.	.|.	.|.	.|.	.|.	.|.	.|.	.|.	.|.	.|.	.|.
chr12:62369295-62369325	.|.	.|.	.|.	.|.	.|.	.|.	.|.	.|.	.|.	.|.	.|.	36|38	.|.	.|.	.|.	.|.	.|.	.|.	.|.	.|.	.|.	.|.	.|.	.|.	30|26	.|.	.|.	.|.	.|.	.|.	.|.	32|34	.|.	.|.	.|.	.|.	34|34	.|.	.|.	.|.	.|.	.|.	.|.	.|.	.|.	.|.	.|.	.|.	.|.
chr12:62423592-62423622	24|24	.|.	.|.	.|.	.|.	.|.	.|.	.|.	.|.	.|.	.|.	34|40	.|.	.|.	.|.	.|.	.|.	.|.	34|38	.|.	.|.	.|.	24|26	36|38	.|.	.|.	.|.	.|.	24|26	.|.	.|.	24|24	.|.	.|.	.|.	.|.	.|.	.|.	.|.	.|.	34|38	.|.	.|.	.|.	.|.	.|.	.|.	.|.	.|.
chr12:62623628-62623655	.|.	27|27	.|.	.|.	27|27	.|.	.|.	.|.	27|27	.|.	.|.	27|27	27|27	27|27	27|27	.|.	.|.	27|27	.|.	27|27	27|27	.|.	.|.	27|27	27|27	27|27	.|.	27|27	27|27	27|27	27|27	.|.	27|27	27|27	.|.	.|.	.|.	27|27	27|27	27|27	27|27	27|27	.|.	.|.	27|27	27|27	27|27	27|27	.|.
chr12:62683478-62683518	.|.	32|32	.|.	.|.	.|.	.|.	.|.	.|.	.|.	.|.	.|.	.|.	.|.	.|.	.|.	.|.	32|34	.|.	.|.	50|54	.|.	.|.	.|.	52|54	.|.	.|.	.|.	.|.	.|.	.|.	.|.	.|.	.|.	.|.	.|.	.|.	.|.	.|.	.|.	.|.	.|.	.|.	.|.	.|.	.|.	.|.	.|.	.|.	.|.
chr12:63096324-63096360	30|30	.|.	30|30	.|.	.|.	.|.	28|30	30|30	.|.	24|24	.|.	.|.	.|.	.|.	.|.	.|.	.|.	.|.	.|.	.|.	.|.	.|.	.|.	.|.	.|.	.|.	.|.	.|.	.|.	.|.	28|30	.|.	.|.	22|22	.|.	.|.	22|22	.|.	.|.	28|32	22|22	.|.	.|.	.|.	.|.	22|22	.|.	.|.	.|.
chr12:63142309-63142347	.|.	32|32	.|.	.|.	.|.	.|.	.|.	42|48	.|.	.|.	.|.	.|.	.|.	.|.	.|.	.|.	.|.	.|.	.|.	.|.	.|.	38|46	.|.	32|34	.|.	.|.	38|34	32|34	34|36	.|.	42|48	34|34	34|46	.|.	.|.	34|46	.|.	44|48	46|50	46|48	34|48	44|48	34|46	34|36	44|48	44|48	44|48	.|.	.|.
chr12:63284497-63284535	.|.	.|.	.|.	.|.	.|.	.|.	.|.	.|.	.|.	36|36	.|.	.|.	36|38	.|.	.|.	.|.	.|.	.|.	.|.	.|.	28|30	.|.	.|.	.|.	.|.	.|.	.|.	.|.	.|.	.|.	30|36	.|.	.|.	.|.	.|.	.|.	.|.	.|.	.|.	.|.	.|.	.|.	.|.	26|28	.|.	.|.	.|.	.|.	.|.
chr12:63343421-63343451	.|.	.|.	.|.	.|.	.|.	.|.	.|.	.|.	.|.	.|.	.|.	.|.	.|.	.|.	.|.	.|.	.|.	.|.	.|.	.|.	.|.	.|.	.|.	.|.	.|.	.|.	.|.	.|.	.|.	.|.	.|.	.|.	.|.	.|.	.|.	.|.	.|.	.|.	.|.	.|.	.|.	.|.	.|.	.|.	.|.	.|.	.|.	.|.	.|.
chr12:63550133-63550173	.|.	.|.	.|.	.|.	.|.	.|.	.|.	.|.	.|.	.|.	.|.	.|.	.|.	.|.	.|.	.|.	.|.	.|.	.|.	.|.	.|.	.|.	.|.	.|.	.|.	.|.	.|.	.|.	.|.	.|.	.|.	40|36	.|.	.|.	.|.	.|.	.|.	.|.	.|.	.|.	.|.	.|.	.|.	.|.	.|.	40|38	.|.	.|.	.|.
chr12:63550480-63550530	.|.	.|.	.|.	.|.	.|.	.|.	.|.	.|.	.|.	.|.	.|.	.|.	.|.	.|.	.|.	.|.	.|.	.|.	.|.	.|.	.|.	.|.	.|.	.|.	.|.	.|.	.|.	.|.	.|.	.|.	.|.	.|.	.|.	.|.	.|.	.|.	.|.	.|.	.|.	.|.	.|.	.|.	.|.	.|.	34|36	.|.	.|.	.|.	.|.
chr12:63767752-63767780	.|.	.|.	.|.	.|.	.|.	.|.	.|.	.|.	.|.	.|.	.|.	.|.	.|.	.|.	.|.	.|.	.|.	.|.	.|.	.|.	.|.	.|.	.|.	.|.	.|.	.|.	.|.	.|.	.|.	.|.	.|.	.|.	.|.	.|.	.|.	.|.	.|.	24|24	.|.	.|.	.|.	.|.	.|.	.|.	.|.	.|.	.|.	.|.	.|.
chr12:64433408-64433440	58|62	.|.	.|.	.|.	.|.	.|.	.|.	.|.	.|.	.|.	.|.	.|.	34|36	.|.	.|.	.|.	.|.	.|.	.|.	34|62	.|.	.|.	.|.	.|.	40|66	.|.	.|.	.|.	.|.	.|.	.|.	34|36	34|36	.|.	.|.	.|.	56|60	32|36	.|.	.|.	34|36	.|.	36|36	58|64	.|.	.|.	56|56	.|.	.|.
chr12:65083000-65083026	22|22	.|.	.|.	.|.	22|22	.|.	.|.	.|.	.|.	.|.	.|.	.|.	.|.	.|.	32|36	.|.	.|.	.|.	.|.	.|.	.|.	.|.	.|.	.|.	22|36	.|.	.|.	.|.	22|22	.|.	22|22	.|.	22|22	.|.	22|22	34|36	34|36	.|.	.|.	.|.	22|36	28|36	22|22	22|22	.|.	22|36	.|.	22|36	.|.
chr12:65506184-65506230	.|.	.|.	.|.	.|.	.|.	.|.	.|.	.|.	.|.	.|.	.|.	.|.	.|.	.|.	.|.	.|.	.|.	.|.	.|.	.|.	48|48	.|.	.|.	.|.	.|.	44|48	.|.	.|.	.|.	.|.	.|.	.|.	.|.	.|.	46|48	.|.	.|.	48|48	50|52	.|.	.|.	.|.	.|.	.|.	.|.	.|.	.|.	.|.	.|.
chr12:66019092-66019124	.|.	.|.	28|30	.|.	.|.	.|.	.|.	.|.	.|.	.|.	.|.	.|.	.|.	32|28	.|.	.|.	.|.	.|.	32|28	.|.	.|.	28|30	.|.	.|.	.|.	.|.	28|30	32|28	.|.	.|.	.|.	.|.	.|.	.|.	.|.	.|.	.|.	.|.	.|.	28|28	.|.	.|.	.|.	28|30	28|28	.|.	28|28	26|26	26|30
chr12:66142295-66142327	.|.	.|.	.|.	.|.	.|.	.|.	.|.	32|32	.|.	.|.	.|.	.|.	.|.	.|.	.|.	.|.	.|.	.|.	.|.	32|32	32|32	.|.	.|.	.|.	.|.	.|.	.|.	.|.	.|.	.|.	.|.	.|.	.|.	.|.	.|.	.|.	.|.	.|.	.|.	.|.	.|.	.|.	.|.	.|.	.|.	.|.	.|.	.|.	.|.
chr12:66441822-66441860	.|.	.|.	.|.	.|.	.|.	46|50	.|.	.|.	.|.	.|.	.|.	.|.	.|.	48|52	44|50	.|.	.|.	.|.	.|.	32|32	.|.	.|.	.|.	32|42	30|32	44|48	34|36	.|.	.|.	.|.	32|34	.|.	34|50	.|.	.|.	.|.	.|.	.|.	.|.	32|48	32|52	.|.	.|.	.|.	.|.	.|.	.|.	.|.	.|.
chr12:67896921-67896946	.|.	.|.	.|.	.|.	.|.	.|.	.|.	.|.	.|.	.|.	.|.	25|25	.|.	.|.	.|.	.|.	.|.	.|.	.|.	.|.	.|.	.|.	25|25	.|.	.|.	24|24	.|.	.|.	.|.	.|.	.|.	.|.	.|.	.|.	.|.	.|.	.|.	.|.	.|.	.|.	.|.	25|24	.|.	.|.	25|25	.|.	.|.	.|.	.|.
chr12:68129586-68129622	.|.	.|.	.|.	.|.	.|.	.|.	.|.	.|.	.|.	.|.	.|.	.|.	.|.	.|.	.|.	.|.	.|.	.|.	.|.	.|.	.|.	44|46	.|.	.|.	.|.	44|46	.|.	.|.	.|.	.|.	.|.	.|.	.|.	.|.	.|.	.|.	.|.	.|.	.|.	.|.	.|.	.|.	.|.	.|.	.|.	.|.	.|.	.|.	.|.
chr12:68150328-68150362	30|32	.|.	.|.	.|.	28|32	.|.	.|.	.|.	28|32	.|.	.|.	30|26	.|.	.|.	.|.	30|26	.|.	.|.	.|.	28|32	.|.	.|.	28|32	.|.	28|32	30|26	.|.	.|.	.|.	.|.	.|.	.|.	.|.	.|.	.|.	28|30	.|.	.|.	28|32	.|.	28|30	.|.	.|.	.|.	28|32	30|26	30|26	30|26	.|.
chr12:68267412-68267437	.|.	.|.	.|.	.|.	25|25	25|25	.|.	.|.	.|.	.|.	.|.	.|.	.|.	.|.	.|.	.|.	.|.	.|.	.|.	.|.	.|.	.|.	.|.	.|.	25|25	.|.	25|25	.|.	.|.	.|.	.|.	.|.	.|.	.|.	.|.	25|25	.|.	.|.	.|.	.|.	.|.	.|.	.|.	.|.	25|25	.|.	.|.	.|.	.|.
chr12:68327341-68327385	.|.	.|.	.|.	.|.	.|.	.|.	.|.	.|.	.|.	.|.	.|.	.|.	.|.	52|56	.|.	.|.	.|.	.|.	.|.	.|.	.|.	.|.	.|.	.|.	.|.	54|58	.|.	.|.	52|54	.|.	.|.	.|.	.|.	.|.	.|.	.|.	.|.	.|.	.|.	.|.	.|.	52|56	.|.	.|.	.|.	.|.	.|.	.|.	.|.
chr12:68449279-68449304	.|.	.|.	.|.	.|.	.|.	.|.	.|.	.|.	.|.	.|.	.|.	.|.	.|.	.|.	.|.	.|.	.|.	.|.	25|25	.|.	.|.	.|.	.|.	.|.	.|.	.|.	.|.	.|.	.|.	.|.	25|25	.|.	.|.	.|.	.|.	.|.	.|.	.|.	.|.	.|.	.|.	.|.	.|.	.|.	.|.	.|.	.|.	.|.	.|.
chr12:68475783-68475809	.|.	.|.	.|.	.|.	.|.	.|.	.|.	.|.	.|.	.|.	.|.	.|.	.|.	.|.	26|26	.|.	.|.	.|.	.|.	.|.	.|.	.|.	.|.	.|.	.|.	.|.	.|.	.|.	.|.	.|.	.|.	.|.	.|.	.|.	.|.	.|.	.|.	.|.	.|.	.|.	.|.	.|.	.|.	.|.	.|.	.|.	.|.	.|.	.|.
chr12:68552494-68552522	32|32	32|32	26|32	30|32	26|26	32|32	32|32	26|32	26|26	26|32	.|.	26|32	26|32	.|.	26|30	26|26	.|.	.|.	.|.	26|32	26|26	.|.	26|26	.|.	.|.	26|32	26|32	.|.	26|32	.|.	24|26	.|.	26|32	26|26	.|.	26|32	26|32	22|26	26|32	30|32	26|32	26|32	26|26	26|26	.|.	26|26	26|26	26|32	26|26
chr12:69316940-69316994	.|.	.|.	.|.	.|.	.|.	.|.	.|.	.|.	.|.	.|.	.|.	.|.	.|.	.|.	.|.	.|.	.|.	42|46	.|.	.|.	.|.	.|.	.|.	.|.	.|.	.|.	.|.	.|.	.|.	.|.	.|.	.|.	.|.	.|.	.|.	.|.	.|.	.|.	.|.	.|.	.|.	.|.	.|.	.|.	.|.	.|.	.|.	.|.	.|.
chr12:69666649-69666677	.|.	28|28	.|.	.|.	.|.	.|.	28|28	.|.	.|.	.|.	.|.	.|.	.|.	.|.	.|.	.|.	.|.	.|.	.|.	.|.	.|.	.|.	.|.	.|.	28|26	.|.	.|.	.|.	.|.	.|.	.|.	.|.	28|28	.|.	.|.	.|.	.|.	.|.	26|26	.|.	.|.	.|.	.|.	.|.	28|26	.|.	.|.	.|.	.|.
chr12:70148123-70148149	.|.	.|.	.|.	.|.	.|.	.|.	.|.	.|.	.|.	.|.	.|.	.|.	.|.	22|22	.|.	.|.	.|.	.|.	.|.	.|.	.|.	.|.	.|.	.|.	.|.	.|.	.|.	.|.	18|20	.|.	.|.	.|.	.|.	.|.	.|.	.|.	.|.	.|.	.|.	.|.	.|.	.|.	.|.	.|.	.|.	.|.	.|.	.|.	.|.
chr12:70423508-70423546	.|.	.|.	.|.	.|.	.|.	.|.	.|.	.|.	.|.	.|.	.|.	38|36	.|.	.|.	.|.	.|.	.|.	.|.	.|.	36|30	.|.	.|.	.|.	.|.	.|.	.|.	34|36	34|36	.|.	.|.	36|30	.|.	.|.	.|.	.|.	.|.	.|.	38|34	36|36	.|.	.|.	.|.	.|.	.|.	.|.	.|.	.|.	.|.	.|.
chr12:70508233-70508260	.|.	.|.	.|.	.|.	.|.	.|.	.|.	24|24	.|.	.|.	.|.	.|.	.|.	.|.	.|.	.|.	.|.	.|.	.|.	.|.	.|.	.|.	.|.	.|.	.|.	.|.	24|24	.|.	.|.	.|.	.|.	.|.	.|.	.|.	.|.	.|.	.|.	.|.	.|.	.|.	.|.	.|.	.|.	.|.	.|.	.|.	.|.	.|.	.|.
chr12:70513755-70513781	.|.	.|.	30|30	.|.	.|.	.|.	.|.	.|.	.|.	.|.	.|.	.|.	.|.	.|.	.|.	.|.	.|.	.|.	.|.	44|44	.|.	.|.	.|.	.|.	.|.	.|.	.|.	.|.	.|.	.|.	.|.	.|.	.|.	.|.	.|.	.|.	.|.	.|.	.|.	30|30	.|.	.|.	30|30	.|.	.|.	.|.	.|.	.|.	.|.
chr12:70601740-70601768	.|.	.|.	.|.	.|.	.|.	36|36	.|.	.|.	.|.	.|.	.|.	.|.	.|.	.|.	30|30	.|.	.|.	.|.	.|.	30|30	.|.	.|.	.|.	34|34	.|.	34|34	30|30	.|.	.|.	.|.	30|30	30|32	.|.	.|.	.|.	.|.	30|30	.|.	34|34	.|.	.|.	.|.	28|28	30|30	.|.	.|.	.|.	.|.	.|.
chr12:71102595-71102625	.|.	.|.	.|.	.|.	.|.	.|.	.|.	.|.	.|.	.|.	.|.	.|.	.|.	.|.	.|.	.|.	.|.	.|.	.|.	.|.	.|.	.|.	.|.	.|.	.|.	.|.	.|.	.|.	.|.	.|.	.|.	.|.	.|.	.|.	.|.	.|.	.|.	.|.	.|.	.|.	.|.	.|.	.|.	.|.	.|.	.|.	.|.	.|.	24|26
chr12:72156881-72156909	22|22	.|.	.|.	.|.	.|.	.|.	24|26	.|.	.|.	22|22	.|.	28|26	.|.	.|.	.|.	.|.	.|.	.|.	.|.	.|.	.|.	.|.	.|.	.|.	.|.	22|22	.|.	24|26	.|.	.|.	.|.	.|.	.|.	.|.	.|.	.|.	.|.	.|.	.|.	.|.	.|.	.|.	.|.	.|.	.|.	.|.	.|.	.|.	.|.
chr12:72489914-72489946	.|.	.|.	.|.	.|.	.|.	.|.	.|.	.|.	.|.	.|.	.|.	44|46	.|.	.|.	.|.	.|.	.|.	.|.	.|.	.|.	.|.	.|.	.|.	.|.	26|46	44|46	.|.	44|46	.|.	.|.	26|28	.|.	.|.	.|.	.|.	.|.	.|.	.|.	.|.	.|.	26|26	.|.	44|46	44|46	44|46	.|.	44|46	.|.	.|.
chr12:72768072-72768112	.|.	.|.	.|.	30|32	42|44	.|.	.|.	.|.	.|.	.|.	.|.	.|.	.|.	.|.	.|.	.|.	30|32	.|.	.|.	30|32	42|44	.|.	.|.	.|.	.|.	.|.	.|.	.|.	.|.	.|.	38|42	.|.	.|.	.|.	.|.	.|.	.|.	.|.	.|.	.|.	.|.	.|.	.|.	.|.	40|44	.|.	.|.	.|.	.|.
chr12:73606272-73606314	40|40	.|.	.|.	.|.	.|.	40|40	.|.	.|.	.|.	.|.	.|.	.|.	.|.	.|.	.|.	.|.	.|.	38|40	.|.	.|.	.|.	.|.	.|.	.|.	.|.	.|.	.|.	.|.	.|.	.|.	.|.	.|.	.|.	.|.	.|.	.|.	.|.	.|.	.|.	.|.	.|.	.|.	.|.	.|.	.|.	.|.	.|.	.|.	.|.
chr12:73635942-73635968	.|.	.|.	.|.	.|.	.|.	24|24	.|.	.|.	.|.	24|24	.|.	.|.	.|.	.|.	.|.	.|.	.|.	.|.	.|.	26|26	.|.	.|.	.|.	.|.	.|.	.|.	.|.	.|.	.|.	.|.	.|.	.|.	24|24	.|.	.|.	.|.	.|.	.|.	.|.	.|.	.|.	.|.	.|.	.|.	.|.	.|.	.|.	.|.	.|.
chr12:73639227-73639259	.|.	.|.	.|.	.|.	32|34	.|.	.|.	.|.	.|.	.|.	.|.	.|.	.|.	.|.	.|.	.|.	.|.	.|.	.|.	32|34	.|.	.|.	28|30	.|.	.|.	.|.	.|.	.|.	.|.	.|.	.|.	.|.	32|34	.|.	.|.	.|.	.|.	.|.	.|.	.|.	.|.	.|.	.|.	.|.	.|.	.|.	.|.	.|.	.|.
chr12:7401297-7401321	.|.	.|.	.|.	24|24	.|.	24|24	.|.	.|.	.|.	.|.	.|.	24|24	.|.	.|.	.|.	.|.	.|.	.|.	.|.	24|24	.|.	.|.	24|24	.|.	24|24	.|.	24|24	.|.	.|.	.|.	.|.	.|.	.|.	.|.	.|.	.|.	.|.	.|.	24|24	.|.	.|.	24|24	24|24	.|.	.|.	.|.	.|.	.|.	.|.
chr12:74823707-74823739	28|30	.|.	.|.	.|.	.|.	.|.	.|.	.|.	24|30	.|.	.|.	.|.	.|.	.|.	.|.	.|.	.|.	.|.	.|.	.|.	.|.	.|.	.|.	.|.	26|26	.|.	.|.	.|.	.|.	.|.	.|.	.|.	.|.	.|.	.|.	.|.	.|.	.|.	.|.	.|.	.|.	.|.	.|.	.|.	.|.	.|.	.|.	.|.	.|.
chr12:74957679-74957723	.|.	.|.	34|42	.|.	28|30	.|.	28|30	.|.	.|.	.|.	.|.	36|36	.|.	38|42	.|.	.|.	.|.	.|.	.|.	.|.	.|.	.|.	.|.	.|.	.|.	36|42	.|.	.|.	.|.	.|.	.|.	.|.	.|.	.|.	.|.	.|.	.|.	.|.	.|.	38|42	.|.	.|.	.|.	.|.	.|.	44|38	.|.	34|42	.|.
chr12:75148932-75148964	.|.	.|.	.|.	.|.	.|.	.|.	.|.	.|.	.|.	.|.	.|.	.|.	.|.	.|.	.|.	.|.	.|.	.|.	.|.	.|.	.|.	.|.	.|.	.|.	.|.	.|.	.|.	.|.	.|.	.|.	.|.	.|.	.|.	.|.	.|.	.|.	.|.	.|.	.|.	.|.	.|.	.|.	.|.	.|.	.|.	.|.	.|.	.|.	.|.
chr12:75159245-75159277	.|.	.|.	.|.	.|.	.|.	.|.	.|.	.|.	.|.	.|.	.|.	.|.	.|.	.|.	.|.	.|.	.|.	.|.	.|.	.|.	.|.	.|.	.|.	.|.	.|.	32|32	.|.	.|.	.|.	.|.	.|.	.|.	.|.	.|.	.|.	32|32	.|.	.|.	.|.	.|.	.|.	.|.	.|.	.|.	.|.	.|.	.|.	.|.	.|.
chr12:75455346-75455392	32|32	.|.	.|.	.|.	.|.	.|.	.|.	.|.	.|.	.|.	.|.	.|.	.|.	42|44	.|.	.|.	.|.	.|.	.|.	.|.	.|.	.|.	.|.	.|.	.|.	44|48	.|.	.|.	.|.	.|.	32|32	.|.	.|.	.|.	.|.	.|.	.|.	.|.	.|.	.|.	.|.	.|.	32|32	.|.	.|.	.|.	.|.	.|.	.|.
chr12:75469818-75469860	.|.	.|.	.|.	.|.	.|.	.|.	.|.	42|34	.|.	.|.	.|.	.|.	.|.	34|36	.|.	.|.	40|44	.|.	.|.	.|.	.|.	.|.	.|.	.|.	.|.	.|.	.|.	.|.	.|.	.|.	.|.	.|.	.|.	.|.	.|.	.|.	.|.	.|.	.|.	.|.	.|.	.|.	.|.	.|.	.|.	.|.	.|.	.|.	.|.
chr12:75606912-75606946	.|.	.|.	.|.	.|.	.|.	.|.	.|.	.|.	.|.	.|.	.|.	32|32	.|.	.|.	.|.	.|.	.|.	40|42	.|.	44|44	.|.	.|.	.|.	.|.	.|.	.|.	.|.	.|.	.|.	.|.	.|.	.|.	26|32	.|.	.|.	40|44	.|.	.|.	.|.	.|.	30|32	.|.	.|.	34|30	.|.	.|.	32|32	.|.	.|.
chr12:75909026-75909064	38|40	.|.	.|.	.|.	.|.	.|.	.|.	.|.	.|.	.|.	.|.	.|.	.|.	.|.	.|.	.|.	.|.	.|.	.|.	.|.	.|.	.|.	.|.	.|.	.|.	.|.	.|.	.|.	.|.	.|.	.|.	.|.	.|.	.|.	.|.	.|.	.|.	.|.	.|.	.|.	.|.	.|.	.|.	.|.	.|.	.|.	.|.	.|.	.|.
chr12:75925839-75925875	30|32	.|.	.|.	.|.	.|.	.|.	.|.	.|.	.|.	.|.	.|.	.|.	.|.	.|.	.|.	.|.	.|.	.|.	.|.	.|.	.|.	.|.	30|32	.|.	22|22	.|.	.|.	.|.	.|.	.|.	.|.	.|.	.|.	.|.	.|.	.|.	30|32	.|.	.|.	24|20	.|.	.|.	.|.	30|32	.|.	.|.	.|.	.|.	.|.
chr12:76035954-76035994	.|.	.|.	.|.	.|.	.|.	.|.	.|.	.|.	.|.	.|.	.|.	.|.	.|.	40|44	.|.	.|.	.|.	.|.	.|.	.|.	.|.	44|44	.|.	.|.	.|.	.|.	.|.	.|.	.|.	.|.	.|.	.|.	.|.	42|46	.|.	.|.	.|.	.|.	.|.	.|.	.|.	.|.	.|.	.|.	.|.	.|.	.|.	.|.	.|.
chr12:76304736-76304774	32|32	.|.	32|34	.|.	32|34	.|.	32|34	32|34	32|32	.|.	.|.	32|34	32|34	.|.	.|.	.|.	32|34	.|.	.|.	.|.	.|.	.|.	.|.	.|.	.|.	32|34	34|34	32|34	32|34	.|.	.|.	.|.	.|.	.|.	.|.	32|34	32|34	.|.	32|34	.|.	32|34	.|.	.|.	.|.	32|34	32|34	.|.	.|.	.|.
chr12:76497103-76497139	.|.	.|.	.|.	.|.	.|.	.|.	.|.	.|.	.|.	.|.	.|.	.|.	.|.	40|44	.|.	40|42	.|.	.|.	.|.	38|40	.|.	.|.	.|.	.|.	.|.	.|.	36|40	.|.	.|.	.|.	.|.	.|.	38|42	.|.	.|.	40|42	40|42	38|42	.|.	.|.	38|42	.|.	40|42	.|.	36|42	40|42	.|.	40|42	.|.
chr12:76619888-76619926	.|.	.|.	.|.	.|.	.|.	.|.	.|.	.|.	.|.	.|.	.|.	.|.	.|.	.|.	.|.	.|.	.|.	.|.	.|.	.|.	.|.	.|.	.|.	.|.	.|.	.|.	.|.	.|.	.|.	.|.	.|.	.|.	.|.	.|.	.|.	.|.	.|.	.|.	.|.	.|.	.|.	.|.	.|.	.|.	.|.	.|.	.|.	.|.	.|.
chr12:76934267-76934307	.|.	.|.	.|.	.|.	.|.	.|.	.|.	.|.	.|.	.|.	.|.	.|.	.|.	.|.	.|.	.|.	.|.	.|.	.|.	30|32	.|.	.|.	.|.	.|.	.|.	.|.	.|.	.|.	.|.	.|.	.|.	.|.	.|.	.|.	.|.	.|.	.|.	.|.	.|.	.|.	.|.	.|.	.|.	.|.	.|.	.|.	.|.	.|.	.|.
chr12:77124378-77124404	.|.	.|.	.|.	.|.	.|.	.|.	.|.	.|.	.|.	.|.	.|.	.|.	26|24	.|.	.|.	.|.	.|.	.|.	.|.	.|.	.|.	.|.	.|.	.|.	.|.	.|.	.|.	26|26	.|.	.|.	.|.	.|.	26|26	.|.	.|.	.|.	.|.	.|.	.|.	.|.	.|.	.|.	.|.	.|.	.|.	.|.	.|.	.|.	.|.
chr12:77263309-77263359	.|.	.|.	.|.	38|40	.|.	.|.	.|.	.|.	.|.	.|.	.|.	.|.	.|.	.|.	.|.	.|.	.|.	.|.	.|.	.|.	.|.	.|.	.|.	.|.	.|.	.|.	.|.	.|.	.|.	.|.	.|.	.|.	.|.	.|.	.|.	.|.	.|.	.|.	.|.	.|.	.|.	.|.	.|.	.|.	.|.	.|.	.|.	.|.	.|.
chr12:77492005-77492043	.|.	34|36	.|.	.|.	.|.	.|.	.|.	.|.	.|.	.|.	.|.	.|.	.|.	.|.	.|.	.|.	.|.	.|.	.|.	.|.	.|.	.|.	.|.	.|.	.|.	.|.	38|36	.|.	.|.	.|.	.|.	.|.	.|.	.|.	38|32	.|.	.|.	.|.	38|36	.|.	.|.	.|.	.|.	.|.	38|34	.|.	38|34	.|.	.|.
chr12:77652143-77652185	.|.	.|.	.|.	.|.	.|.	.|.	.|.	.|.	.|.	.|.	.|.	.|.	.|.	.|.	.|.	.|.	.|.	.|.	.|.	.|.	.|.	.|.	.|.	.|.	.|.	.|.	.|.	38|40	.|.	.|.	.|.	.|.	.|.	.|.	36|38	.|.	.|.	.|.	.|.	.|.	38|38	.|.	.|.	.|.	40|42	.|.	.|.	.|.	.|.
chr12:77858222-77858252	.|.	.|.	.|.	.|.	.|.	.|.	.|.	30|30	.|.	.|.	.|.	.|.	.|.	30|30	.|.	.|.	30|30	.|.	.|.	.|.	.|.	.|.	.|.	.|.	.|.	.|.	.|.	.|.	.|.	.|.	.|.	30|30	30|30	.|.	.|.	.|.	.|.	.|.	.|.	.|.	.|.	.|.	.|.	.|.	.|.	.|.	.|.	.|.	.|.
chr12:78718593-78718623	.|.	.|.	34|34	.|.	28|28	28|28	.|.	28|28	34|34	.|.	.|.	34|34	.|.	34|34	.|.	30|34	28|28	32|34	.|.	28|34	28|28	28|28	.|.	.|.	28|36	34|34	26|26	32|34	.|.	34|34	28|28	.|.	28|34	28|28	.|.	.|.	28|34	34|34	28|28	28|36	28|34	28|28	.|.	28|28	28|34	28|32	.|.	.|.	.|.
chr12:78957292-78957338	.|.	.|.	.|.	.|.	.|.	.|.	.|.	.|.	.|.	.|.	.|.	.|.	.|.	.|.	.|.	.|.	.|.	.|.	.|.	40|44	.|.	40|42	.|.	.|.	.|.	.|.	.|.	.|.	.|.	42|44	.|.	.|.	.|.	.|.	.|.	.|.	.|.	.|.	.|.	.|.	.|.	.|.	.|.	.|.	.|.	.|.	.|.	.|.	.|.
chr12:79001207-79001251	.|.	42|46	.|.	.|.	.|.	.|.	.|.	.|.	.|.	.|.	.|.	.|.	.|.	.|.	.|.	46|50	.|.	.|.	.|.	.|.	.|.	.|.	44|46	44|42	.|.	.|.	.|.	.|.	44|48	.|.	44|40	.|.	.|.	.|.	.|.	.|.	.|.	.|.	.|.	.|.	.|.	.|.	.|.	.|.	.|.	.|.	.|.	.|.	.|.
chr12:79335174-79335214	.|.	.|.	.|.	.|.	.|.	.|.	.|.	.|.	.|.	.|.	.|.	.|.	.|.	.|.	.|.	.|.	.|.	.|.	.|.	.|.	.|.	.|.	.|.	.|.	.|.	.|.	.|.	.|.	.|.	.|.	.|.	.|.	.|.	.|.	.|.	.|.	.|.	.|.	.|.	.|.	.|.	46|48	.|.	.|.	.|.	.|.	.|.	.|.	.|.
chr12:79760674-79760726	.|.	.|.	.|.	.|.	.|.	.|.	.|.	.|.	.|.	.|.	.|.	.|.	.|.	.|.	.|.	.|.	.|.	.|.	.|.	.|.	.|.	.|.	52|50	.|.	.|.	.|.	.|.	.|.	.|.	.|.	.|.	.|.	.|.	.|.	.|.	.|.	.|.	.|.	.|.	.|.	.|.	.|.	.|.	.|.	.|.	.|.	.|.	48|50	.|.
chr12:80155234-80155266	.|.	.|.	.|.	.|.	32|32	.|.	.|.	.|.	.|.	32|32	.|.	.|.	.|.	.|.	32|32	.|.	.|.	.|.	.|.	.|.	.|.	.|.	.|.	34|34	.|.	.|.	.|.	32|32	.|.	.|.	.|.	.|.	.|.	.|.	.|.	32|30	.|.	.|.	.|.	.|.	32|30	34|34	.|.	.|.	.|.	.|.	.|.	.|.	.|.
chr12:81204172-81204216	32|36	36|36	.|.	.|.	36|36	.|.	.|.	.|.	34|36	.|.	34|36	34|36	36|36	.|.	36|36	.|.	.|.	.|.	34|36	34|36	34|36	34|36	34|36	.|.	34|36	.|.	34|36	.|.	34|36	34|36	.|.	.|.	34|36	.|.	34|36	34|36	34|36	.|.	34|36	34|36	.|.	.|.	34|36	.|.	.|.	.|.	.|.	34|36	.|.
chr12:81214409-81214437	.|.	.|.	.|.	.|.	.|.	.|.	.|.	.|.	.|.	.|.	.|.	.|.	.|.	.|.	.|.	.|.	.|.	.|.	.|.	34|36	.|.	.|.	.|.	.|.	34|36	.|.	.|.	34|36	34|36	.|.	.|.	.|.	.|.	.|.	.|.	.|.	.|.	.|.	.|.	.|.	.|.	.|.	.|.	.|.	.|.	.|.	26|24	.|.	.|.
chr12:81620743-81620769	.|.	.|.	.|.	.|.	.|.	.|.	.|.	22|22	.|.	.|.	.|.	.|.	.|.	.|.	.|.	.|.	.|.	.|.	.|.	.|.	.|.	.|.	.|.	.|.	.|.	.|.	.|.	.|.	.|.	.|.	.|.	.|.	.|.	.|.	.|.	.|.	.|.	.|.	.|.	.|.	22|22	.|.	.|.	.|.	.|.	.|.	.|.	.|.	.|.
chr12:81621177-81621201	.|.	.|.	28|28	.|.	28|28	.|.	.|.	.|.	.|.	.|.	.|.	.|.	36|36	.|.	.|.	.|.	.|.	.|.	.|.	.|.	.|.	.|.	.|.	.|.	28|28	.|.	.|.	.|.	.|.	.|.	.|.	.|.	.|.	.|.	.|.	.|.	.|.	.|.	.|.	.|.	.|.	.|.	.|.	.|.	.|.	.|.	.|.	.|.	.|.
chr12:81820442-81820466	.|.	.|.	.|.	.|.	.|.	.|.	.|.	.|.	.|.	.|.	.|.	.|.	.|.	.|.	.|.	.|.	.|.	.|.	.|.	24|24	.|.	.|.	.|.	.|.	.|.	.|.	.|.	.|.	.|.	.|.	.|.	.|.	.|.	.|.	.|.	.|.	24|24	.|.	.|.	.|.	.|.	.|.	.|.	.|.	.|.	.|.	.|.	.|.	.|.
chr12:82012032-82012060	.|.	26|32	30|32	.|.	28|30	28|30	30|32	.|.	30|32	.|.	.|.	.|.	.|.	.|.	.|.	30|32	.|.	.|.	.|.	30|32	.|.	.|.	30|32	30|32	.|.	30|32	.|.	.|.	30|32	.|.	.|.	.|.	28|30	.|.	.|.	24|26	.|.	.|.	30|32	.|.	28|30	.|.	28|30	28|30	28|30	.|.	.|.	28|30	.|.
chr12:82029699-82029723	.|.	.|.	.|.	.|.	.|.	.|.	.|.	24|24	.|.	.|.	.|.	24|24	.|.	.|.	.|.	.|.	.|.	.|.	.|.	.|.	.|.	.|.	.|.	.|.	.|.	.|.	.|.	.|.	.|.	.|.	.|.	.|.	.|.	.|.	.|.	.|.	.|.	.|.	.|.	.|.	.|.	.|.	.|.	.|.	.|.	.|.	.|.	.|.	.|.
chr12:82611263-82611307	.|.	.|.	.|.	.|.	.|.	.|.	40|40	.|.	.|.	.|.	.|.	.|.	.|.	.|.	.|.	.|.	.|.	.|.	.|.	40|40	.|.	.|.	40|40	.|.	.|.	.|.	.|.	.|.	.|.	.|.	.|.	.|.	.|.	.|.	44|44	.|.	.|.	.|.	.|.	.|.	.|.	.|.	.|.	.|.	.|.	.|.	.|.	.|.	.|.
chr12:83219633-83219657	.|.	.|.	.|.	.|.	.|.	.|.	.|.	.|.	.|.	.|.	.|.	.|.	.|.	.|.	.|.	.|.	.|.	.|.	.|.	24|22	.|.	.|.	24|22	.|.	.|.	24|22	24|22	.|.	24|22	.|.	.|.	20|22	.|.	.|.	.|.	.|.	.|.	.|.	.|.	24|22	.|.	.|.	24|22	20|22	.|.	.|.	20|22	.|.	.|.
chr12:83266992-83267028	.|.	.|.	.|.	.|.	.|.	.|.	.|.	.|.	.|.	.|.	.|.	.|.	.|.	.|.	.|.	.|.	.|.	.|.	.|.	.|.	.|.	.|.	.|.	.|.	.|.	.|.	.|.	.|.	.|.	.|.	.|.	32|32	.|.	.|.	.|.	.|.	.|.	.|.	.|.	.|.	.|.	.|.	.|.	.|.	.|.	32|32	.|.	30|32	.|.
chr12:83572743-83572768	.|.	.|.	.|.	.|.	.|.	.|.	.|.	.|.	.|.	.|.	.|.	35|35	.|.	.|.	.|.	.|.	.|.	.|.	.|.	.|.	.|.	.|.	.|.	.|.	.|.	.|.	.|.	.|.	.|.	25|25	.|.	.|.	.|.	.|.	.|.	.|.	.|.	.|.	.|.	.|.	.|.	.|.	.|.	.|.	.|.	.|.	.|.	.|.	.|.
chr12:83730974-83731018	.|.	.|.	.|.	.|.	.|.	.|.	.|.	.|.	.|.	.|.	.|.	.|.	40|42	.|.	.|.	.|.	.|.	.|.	.|.	.|.	.|.	.|.	.|.	.|.	.|.	.|.	.|.	.|.	.|.	.|.	.|.	.|.	.|.	.|.	.|.	.|.	.|.	.|.	.|.	.|.	.|.	.|.	.|.	.|.	.|.	.|.	.|.	.|.	.|.
chr12:83838095-83838129	.|.	.|.	.|.	.|.	.|.	.|.	.|.	.|.	.|.	.|.	.|.	.|.	.|.	.|.	.|.	.|.	.|.	.|.	.|.	.|.	.|.	.|.	.|.	.|.	.|.	.|.	.|.	.|.	.|.	.|.	.|.	.|.	.|.	.|.	.|.	.|.	34|32	.|.	.|.	.|.	.|.	.|.	.|.	.|.	.|.	.|.	.|.	.|.	.|.
chr12:83867050-83867074	.|.	.|.	24|24	.|.	12|12	12|12	24|24	24|24	.|.	.|.	24|24	.|.	.|.	.|.	12|12	.|.	.|.	.|.	.|.	12|12	.|.	24|24	.|.	12|12	24|24	.|.	24|24	24|24	24|12	.|.	24|24	.|.	12|12	.|.	.|.	.|.	.|.	.|.	.|.	.|.	.|.	.|.	24|24	.|.	.|.	.|.	.|.	.|.	.|.
chr12:83936501-83936527	.|.	.|.	.|.	.|.	.|.	.|.	.|.	.|.	.|.	.|.	.|.	.|.	.|.	.|.	.|.	.|.	.|.	.|.	.|.	.|.	.|.	.|.	.|.	.|.	.|.	.|.	.|.	.|.	.|.	.|.	.|.	.|.	.|.	.|.	.|.	.|.	.|.	.|.	.|.	.|.	.|.	.|.	.|.	.|.	.|.	.|.	.|.	.|.	.|.
chr12:84539337-84539367	.|.	.|.	.|.	.|.	.|.	.|.	.|.	.|.	.|.	.|.	.|.	.|.	26|28	.|.	.|.	.|.	.|.	.|.	24|26	.|.	.|.	.|.	.|.	.|.	.|.	.|.	.|.	.|.	.|.	.|.	.|.	.|.	.|.	.|.	.|.	.|.	.|.	.|.	.|.	.|.	.|.	.|.	.|.	.|.	.|.	.|.	.|.	.|.	.|.
chr12:849306-849342	.|.	.|.	.|.	.|.	.|.	.|.	.|.	.|.	.|.	.|.	.|.	.|.	.|.	.|.	.|.	.|.	.|.	.|.	.|.	.|.	.|.	.|.	.|.	.|.	.|.	.|.	26|28	.|.	.|.	.|.	.|.	.|.	.|.	.|.	.|.	.|.	.|.	.|.	.|.	.|.	.|.	.|.	.|.	.|.	.|.	.|.	.|.	.|.	.|.
chr12:85168004-85168034	.|.	.|.	.|.	.|.	.|.	.|.	.|.	.|.	.|.	.|.	.|.	.|.	.|.	.|.	.|.	.|.	.|.	.|.	.|.	.|.	.|.	.|.	.|.	.|.	.|.	.|.	.|.	.|.	.|.	22|22	.|.	22|22	.|.	.|.	.|.	.|.	.|.	.|.	.|.	.|.	22|22	.|.	.|.	.|.	.|.	.|.	.|.	.|.	.|.
chr12:85750173-85750199	.|.	.|.	.|.	.|.	.|.	.|.	14|14	.|.	.|.	.|.	.|.	.|.	.|.	.|.	.|.	.|.	.|.	.|.	.|.	.|.	.|.	.|.	.|.	.|.	.|.	.|.	.|.	.|.	.|.	.|.	.|.	.|.	.|.	.|.	.|.	.|.	.|.	.|.	.|.	.|.	.|.	.|.	.|.	.|.	.|.	.|.	.|.	.|.	.|.
chr12:85870981-85871017	.|.	.|.	.|.	.|.	.|.	.|.	.|.	.|.	.|.	.|.	.|.	.|.	.|.	.|.	.|.	.|.	.|.	.|.	.|.	.|.	.|.	.|.	.|.	.|.	.|.	.|.	.|.	.|.	.|.	.|.	.|.	.|.	.|.	.|.	.|.	.|.	.|.	.|.	.|.	.|.	.|.	.|.	44|48	.|.	.|.	.|.	.|.	.|.	.|.
chr12:859440-859465	25|25	.|.	.|.	25|25	25|25	.|.	.|.	25|25	25|25	25|25	.|.	.|.	25|25	.|.	25|25	.|.	.|.	.|.	.|.	25|25	.|.	.|.	25|25	25|25	.|.	25|25	25|25	.|.	25|25	.|.	.|.	.|.	25|25	25|25	.|.	25|25	.|.	.|.	25|25	.|.	25|25	.|.	25|25	25|25	.|.	.|.	25|25	.|.	.|.
chr12:86352802-86352867	.|.	70|70	70|70	.|.	70|70	.|.	.|.	.|.	.|.	.|.	.|.	.|.	.|.	.|.	.|.	.|.	.|.	.|.	.|.	.|.	.|.	.|.	.|.	.|.	.|.	.|.	.|.	.|.	.|.	.|.	.|.	.|.	.|.	.|.	.|.	.|.	.|.	.|.	.|.	.|.	.|.	.|.	.|.	.|.	.|.	.|.	.|.	.|.	.|.
chr12:86371559-86371613	.|.	.|.	.|.	18|18	.|.	.|.	.|.	18|18	.|.	.|.	.|.	.|.	.|.	.|.	.|.	.|.	.|.	18|18	.|.	.|.	46|48	.|.	48|50	.|.	46|48	.|.	46|48	.|.	.|.	.|.	46|48	.|.	48|50	.|.	.|.	.|.	.|.	50|52	.|.	.|.	.|.	.|.	.|.	.|.	.|.	.|.	.|.	.|.	.|.
chr12:86397525-86397552	.|.	.|.	.|.	.|.	.|.	.|.	27|27	.|.	.|.	.|.	.|.	.|.	.|.	.|.	.|.	.|.	.|.	.|.	.|.	.|.	.|.	.|.	.|.	.|.	.|.	.|.	.|.	.|.	.|.	.|.	.|.	.|.	.|.	.|.	.|.	.|.	27|27	.|.	.|.	.|.	.|.	.|.	.|.	.|.	.|.	.|.	.|.	.|.	.|.
chr12:86465804-86465838	.|.	.|.	.|.	.|.	.|.	.|.	.|.	.|.	.|.	.|.	.|.	.|.	.|.	.|.	.|.	.|.	.|.	.|.	.|.	.|.	.|.	.|.	.|.	.|.	.|.	34|32	.|.	34|36	.|.	.|.	.|.	.|.	.|.	.|.	.|.	.|.	.|.	.|.	.|.	.|.	.|.	.|.	24|24	.|.	.|.	.|.	.|.	.|.	.|.
chr12:86596792-86596832	.|.	.|.	.|.	.|.	.|.	.|.	.|.	.|.	.|.	.|.	.|.	.|.	.|.	.|.	.|.	.|.	.|.	.|.	.|.	.|.	.|.	.|.	.|.	.|.	.|.	.|.	.|.	.|.	.|.	28|30	.|.	.|.	.|.	.|.	38|42	.|.	.|.	.|.	.|.	.|.	.|.	.|.	.|.	.|.	.|.	.|.	.|.	.|.	.|.
chr12:86652062-86652114	.|.	56|56	.|.	.|.	.|.	.|.	.|.	.|.	.|.	.|.	.|.	.|.	.|.	.|.	.|.	.|.	.|.	.|.	.|.	.|.	.|.	.|.	.|.	52|52	.|.	.|.	.|.	.|.	.|.	.|.	52|52	.|.	.|.	.|.	.|.	.|.	.|.	.|.	.|.	.|.	.|.	.|.	.|.	.|.	.|.	.|.	.|.	.|.	.|.
chr12:86720074-86720110	.|.	.|.	.|.	.|.	.|.	.|.	.|.	.|.	.|.	.|.	.|.	.|.	.|.	.|.	.|.	.|.	.|.	.|.	.|.	.|.	.|.	.|.	.|.	.|.	.|.	.|.	.|.	.|.	.|.	.|.	28|30	.|.	28|30	.|.	.|.	.|.	30|32	.|.	.|.	.|.	.|.	.|.	28|30	.|.	.|.	.|.	.|.	30|32	.|.
chr12:86996660-86996690	.|.	.|.	.|.	.|.	.|.	.|.	.|.	.|.	.|.	.|.	.|.	.|.	.|.	.|.	.|.	.|.	.|.	.|.	.|.	.|.	.|.	.|.	.|.	.|.	.|.	.|.	.|.	.|.	.|.	.|.	.|.	.|.	.|.	.|.	.|.	.|.	.|.	.|.	.|.	.|.	.|.	.|.	.|.	.|.	.|.	.|.	.|.	24|26	.|.
chr12:87174789-87174813	.|.	.|.	.|.	.|.	.|.	.|.	.|.	.|.	.|.	.|.	.|.	.|.	.|.	.|.	.|.	.|.	.|.	.|.	.|.	.|.	.|.	.|.	.|.	.|.	.|.	.|.	.|.	.|.	.|.	20|20	.|.	.|.	.|.	.|.	.|.	.|.	.|.	.|.	.|.	.|.	.|.	.|.	.|.	24|22	.|.	.|.	.|.	.|.	22|22
chr12:87523994-87524034	.|.	.|.	.|.	.|.	.|.	.|.	.|.	.|.	.|.	.|.	.|.	.|.	.|.	.|.	.|.	.|.	.|.	.|.	.|.	.|.	.|.	.|.	.|.	.|.	.|.	.|.	.|.	.|.	.|.	.|.	.|.	.|.	.|.	28|32	.|.	.|.	.|.	.|.	30|32	.|.	.|.	.|.	.|.	.|.	.|.	.|.	.|.	.|.	.|.
chr12:88190400-88190426	.|.	26|26	26|26	.|.	.|.	.|.	.|.	.|.	.|.	30|30	.|.	.|.	.|.	.|.	.|.	.|.	.|.	.|.	.|.	.|.	.|.	.|.	.|.	.|.	.|.	.|.	.|.	.|.	.|.	.|.	.|.	.|.	30|30	.|.	.|.	.|.	.|.	.|.	.|.	.|.	.|.	26|28	.|.	.|.	.|.	.|.	.|.	.|.	.|.
chr12:88203183-88203215	.|.	.|.	.|.	.|.	.|.	.|.	.|.	.|.	.|.	.|.	.|.	28|30	.|.	.|.	.|.	.|.	.|.	.|.	.|.	.|.	.|.	.|.	.|.	.|.	28|30	.|.	.|.	.|.	.|.	.|.	.|.	.|.	28|28	.|.	.|.	.|.	.|.	.|.	28|30	28|30	.|.	.|.	.|.	.|.	.|.	.|.	30|30	.|.	.|.
chr12:88845171-88845203	.|.	.|.	24|28	.|.	26|26	.|.	.|.	28|30	28|30	.|.	.|.	.|.	24|26	.|.	.|.	.|.	.|.	.|.	.|.	.|.	26|30	.|.	.|.	.|.	.|.	.|.	.|.	.|.	.|.	.|.	.|.	.|.	.|.	.|.	.|.	26|30	26|26	.|.	26|26	.|.	28|28	26|30	28|30	.|.	28|30	.|.	30|30	28|30	.|.
chr12:88913376-88913400	.|.	.|.	.|.	.|.	.|.	.|.	.|.	.|.	.|.	.|.	.|.	.|.	.|.	.|.	.|.	.|.	.|.	.|.	.|.	.|.	.|.	.|.	.|.	.|.	.|.	.|.	.|.	.|.	.|.	.|.	.|.	.|.	.|.	.|.	.|.	.|.	.|.	.|.	.|.	24|24	24|24	.|.	.|.	.|.	.|.	.|.	.|.	.|.	.|.
chr12:89976316-89976340	24|24	.|.	.|.	24|24	24|24	.|.	.|.	24|24	.|.	.|.	.|.	.|.	24|24	.|.	.|.	.|.	.|.	.|.	.|.	24|24	24|24	.|.	24|24	24|24	24|24	.|.	24|24	.|.	.|.	.|.	24|24	.|.	24|24	.|.	.|.	.|.	.|.	.|.	24|24	.|.	24|24	.|.	24|24	.|.	.|.	.|.	.|.	.|.	.|.
chr12:90194787-90194821	.|.	.|.	.|.	.|.	.|.	.|.	.|.	.|.	.|.	.|.	.|.	.|.	.|.	.|.	.|.	.|.	.|.	.|.	.|.	.|.	30|32	.|.	.|.	.|.	30|32	.|.	.|.	.|.	.|.	.|.	.|.	.|.	.|.	30|32	.|.	.|.	.|.	.|.	.|.	36|40	.|.	.|.	.|.	.|.	.|.	.|.	.|.	.|.	.|.
chr12:90256283-90256311	28|30	28|30	28|30	.|.	.|.	28|30	.|.	28|26	28|26	.|.	28|30	26|28	28|26	.|.	28|30	.|.	28|30	.|.	28|30	.|.	.|.	.|.	.|.	28|30	.|.	28|26	28|26	28|26	.|.	.|.	28|28	28|26	28|28	.|.	28|30	28|26	28|30	.|.	28|26	28|30	28|26	28|30	28|30	.|.	28|30	28|30	28|24	28|26	.|.
chr12:90465768-90465792	.|.	.|.	.|.	50|52	.|.	.|.	.|.	.|.	.|.	.|.	.|.	.|.	.|.	.|.	.|.	.|.	48|50	.|.	.|.	48|48	.|.	.|.	46|48	.|.	.|.	.|.	.|.	48|48	.|.	48|50	48|48	.|.	.|.	.|.	.|.	.|.	48|48	.|.	.|.	46|46	.|.	.|.	.|.	.|.	48|50	.|.	.|.	.|.	.|.
chr12:90748910-90748952	.|.	.|.	.|.	.|.	.|.	.|.	.|.	.|.	.|.	.|.	.|.	.|.	.|.	56|46	.|.	.|.	.|.	.|.	.|.	48|54	.|.	.|.	.|.	.|.	.|.	.|.	.|.	.|.	50|52	.|.	.|.	.|.	.|.	.|.	.|.	.|.	.|.	.|.	.|.	.|.	.|.	.|.	.|.	.|.	.|.	.|.	.|.	.|.	.|.
chr12:90850342-90850372	.|.	.|.	.|.	.|.	.|.	.|.	.|.	.|.	.|.	.|.	.|.	.|.	.|.	.|.	.|.	.|.	.|.	.|.	.|.	30|30	.|.	30|30	30|30	.|.	30|30	.|.	.|.	.|.	.|.	.|.	30|30	.|.	30|30	.|.	30|30	30|30	.|.	.|.	30|30	.|.	30|30	.|.	.|.	.|.	30|30	.|.	.|.	.|.	.|.
chr12:91083480-91083512	.|.	.|.	.|.	.|.	.|.	.|.	.|.	.|.	.|.	.|.	.|.	.|.	.|.	.|.	.|.	.|.	.|.	.|.	26|26	.|.	.|.	.|.	.|.	.|.	.|.	.|.	32|34	.|.	.|.	.|.	.|.	.|.	.|.	.|.	.|.	.|.	.|.	.|.	.|.	.|.	26|26	.|.	.|.	.|.	.|.	.|.	.|.	.|.	.|.
chr12:91561599-91561623	24|24	.|.	24|24	.|.	24|24	.|.	.|.	.|.	.|.	.|.	24|24	24|24	.|.	.|.	24|24	24|24	24|24	.|.	.|.	24|24	24|23	24|24	24|24	.|.	.|.	24|24	24|24	24|24	.|.	.|.	24|24	.|.	24|24	24|24	24|24	24|24	24|24	24|24	.|.	24|24	.|.	.|.	.|.	24|24	24|24	24|24	24|24	24|24	.|.
chr12:91724727-91724759	.|.	.|.	.|.	.|.	.|.	.|.	.|.	.|.	.|.	.|.	.|.	.|.	.|.	.|.	.|.	.|.	.|.	.|.	.|.	.|.	.|.	20|22	.|.	.|.	20|22	.|.	.|.	.|.	.|.	.|.	.|.	.|.	.|.	.|.	.|.	.|.	.|.	.|.	.|.	.|.	.|.	.|.	.|.	.|.	.|.	.|.	.|.	.|.	.|.
chr12:91996593-91996633	.|.	.|.	.|.	.|.	.|.	.|.	.|.	.|.	.|.	.|.	.|.	.|.	.|.	.|.	.|.	.|.	.|.	.|.	.|.	52|48	.|.	.|.	.|.	.|.	.|.	38|34	.|.	.|.	.|.	.|.	.|.	.|.	.|.	.|.	.|.	.|.	.|.	.|.	.|.	.|.	.|.	.|.	.|.	.|.	56|48	.|.	.|.	.|.	.|.
chr12:92758828-92758853	.|.	.|.	.|.	.|.	.|.	.|.	.|.	.|.	.|.	.|.	.|.	.|.	20|20	.|.	20|20	.|.	.|.	.|.	.|.	.|.	.|.	.|.	20|20	.|.	.|.	.|.	.|.	.|.	20|20	20|20	20|20	.|.	.|.	.|.	.|.	20|20	.|.	.|.	.|.	.|.	.|.	.|.	.|.	.|.	.|.	.|.	.|.	.|.	.|.
chr12:93155778-93155802	.|.	24|24	24|24	24|24	.|.	.|.	.|.	24|24	24|24	.|.	.|.	.|.	.|.	.|.	.|.	24|24	.|.	.|.	.|.	24|24	.|.	.|.	.|.	24|24	.|.	24|24	24|24	24|24	24|24	.|.	24|24	.|.	24|24	24|24	.|.	24|24	24|24	.|.	24|24	24|24	24|24	24|24	24|24	24|24	24|24	24|24	24|24	24|24	24|24
chr12:93164772-93164798	.|.	.|.	.|.	.|.	.|.	.|.	.|.	.|.	.|.	.|.	.|.	.|.	.|.	.|.	.|.	.|.	.|.	.|.	.|.	32|36	.|.	.|.	.|.	.|.	.|.	.|.	.|.	.|.	.|.	.|.	.|.	.|.	.|.	.|.	.|.	.|.	.|.	.|.	.|.	.|.	.|.	.|.	.|.	.|.	.|.	.|.	.|.	.|.	.|.
chr12:93572995-93573033	.|.	.|.	.|.	.|.	.|.	.|.	.|.	.|.	.|.	.|.	.|.	.|.	.|.	.|.	.|.	.|.	.|.	.|.	.|.	.|.	34|36	.|.	.|.	.|.	.|.	.|.	.|.	.|.	.|.	.|.	.|.	.|.	.|.	.|.	.|.	.|.	.|.	.|.	.|.	.|.	.|.	.|.	.|.	.|.	.|.	.|.	.|.	34|36	.|.
chr12:93803447-93803472	.|.	.|.	.|.	.|.	.|.	.|.	.|.	.|.	.|.	.|.	.|.	.|.	.|.	.|.	.|.	.|.	.|.	.|.	.|.	.|.	.|.	.|.	.|.	25|25	25|25	.|.	.|.	.|.	25|25	25|25	.|.	.|.	.|.	.|.	.|.	25|25	.|.	.|.	.|.	.|.	.|.	.|.	.|.	.|.	.|.	.|.	.|.	.|.	.|.
chr12:93853048-93853088	.|.	.|.	36|32	.|.	.|.	.|.	.|.	.|.	.|.	.|.	.|.	.|.	.|.	.|.	40|40	.|.	.|.	.|.	.|.	.|.	.|.	40|40	40|40	.|.	.|.	.|.	.|.	.|.	.|.	.|.	.|.	.|.	.|.	.|.	.|.	.|.	40|40	.|.	.|.	.|.	.|.	40|36	.|.	.|.	.|.	.|.	40|40	.|.	.|.
chr12:94240357-94240401	.|.	.|.	.|.	.|.	.|.	.|.	.|.	.|.	.|.	.|.	.|.	.|.	.|.	.|.	.|.	.|.	.|.	.|.	.|.	.|.	.|.	.|.	46|48	44|42	.|.	.|.	.|.	.|.	.|.	.|.	.|.	.|.	46|48	.|.	.|.	.|.	.|.	.|.	.|.	.|.	.|.	.|.	.|.	.|.	.|.	.|.	.|.	.|.	.|.
chr12:9436051-9436083	.|.	.|.	.|.	.|.	.|.	.|.	.|.	.|.	.|.	.|.	26|28	.|.	.|.	.|.	.|.	.|.	.|.	.|.	.|.	.|.	.|.	.|.	.|.	22|22	.|.	.|.	.|.	.|.	.|.	.|.	.|.	.|.	.|.	.|.	.|.	.|.	.|.	.|.	.|.	.|.	.|.	.|.	.|.	.|.	.|.	.|.	.|.	.|.	.|.
chr12:94488513-94488541	.|.	.|.	.|.	.|.	.|.	.|.	.|.	28|24	.|.	28|28	.|.	26|26	.|.	.|.	.|.	.|.	.|.	.|.	.|.	.|.	.|.	.|.	.|.	26|26	.|.	28|26	.|.	.|.	.|.	.|.	.|.	26|26	.|.	.|.	.|.	.|.	.|.	28|28	.|.	28|28	28|28	.|.	24|26	.|.	.|.	.|.	28|26	28|22	.|.
chr12:94807601-94807641	.|.	.|.	.|.	.|.	.|.	.|.	.|.	.|.	.|.	.|.	.|.	.|.	.|.	.|.	.|.	.|.	.|.	.|.	.|.	.|.	.|.	.|.	.|.	.|.	.|.	.|.	.|.	48|50	.|.	.|.	.|.	.|.	.|.	.|.	.|.	.|.	.|.	.|.	.|.	.|.	.|.	.|.	.|.	.|.	.|.	.|.	.|.	.|.	.|.
chr12:95123655-95123693	.|.	.|.	32|34	.|.	.|.	.|.	.|.	.|.	32|34	.|.	.|.	34|34	.|.	34|34	.|.	.|.	.|.	.|.	.|.	.|.	.|.	30|30	30|30	.|.	.|.	.|.	.|.	30|30	34|34	.|.	34|34	30|30	.|.	.|.	.|.	.|.	30|30	34|34	34|34	.|.	30|34	.|.	.|.	.|.	.|.	.|.	.|.	.|.	28|28
chr12:95571684-95571716	.|.	.|.	.|.	.|.	.|.	.|.	.|.	.|.	.|.	.|.	32|32	.|.	.|.	.|.	.|.	.|.	.|.	.|.	.|.	.|.	.|.	32|32	.|.	.|.	32|32	.|.	32|32	.|.	.|.	.|.	.|.	.|.	.|.	.|.	.|.	.|.	.|.	.|.	.|.	.|.	.|.	.|.	.|.	.|.	.|.	.|.	32|32	.|.	32|32
chr12:96945263-96945301	.|.	.|.	.|.	42|42	.|.	.|.	.|.	.|.	.|.	.|.	.|.	.|.	.|.	.|.	.|.	.|.	.|.	.|.	.|.	.|.	38|38	.|.	.|.	.|.	.|.	.|.	.|.	.|.	.|.	.|.	.|.	40|40	.|.	.|.	.|.	.|.	.|.	.|.	.|.	.|.	.|.	.|.	.|.	.|.	.|.	.|.	.|.	.|.	.|.
chr12:97317566-97317608	.|.	.|.	.|.	.|.	.|.	.|.	.|.	.|.	.|.	.|.	.|.	.|.	.|.	.|.	.|.	.|.	.|.	.|.	.|.	.|.	.|.	.|.	.|.	.|.	.|.	.|.	.|.	.|.	.|.	.|.	.|.	28|28	.|.	.|.	.|.	.|.	.|.	.|.	.|.	.|.	.|.	.|.	.|.	.|.	.|.	.|.	.|.	30|30	.|.
chr12:97465865-97465897	24|26	26|26	.|.	.|.	.|.	.|.	.|.	.|.	24|24	.|.	.|.	.|.	.|.	.|.	.|.	.|.	.|.	.|.	.|.	24|26	24|26	.|.	.|.	.|.	.|.	24|26	.|.	.|.	24|26	.|.	.|.	.|.	.|.	.|.	.|.	24|26	.|.	.|.	.|.	.|.	24|26	.|.	.|.	.|.	.|.	.|.	24|26	.|.	.|.
chr12:97793597-97793629	.|.	30|30	.|.	26|26	.|.	.|.	.|.	.|.	.|.	.|.	.|.	.|.	.|.	.|.	.|.	.|.	.|.	.|.	.|.	26|30	.|.	.|.	28|30	.|.	.|.	.|.	.|.	.|.	.|.	.|.	.|.	.|.	26|26	.|.	.|.	28|30	28|30	.|.	30|30	30|30	30|30	.|.	.|.	.|.	26|26	30|30	.|.	.|.	.|.
chr12:97996943-97996971	.|.	.|.	.|.	.|.	.|.	.|.	.|.	.|.	.|.	22|22	22|22	.|.	.|.	.|.	.|.	.|.	.|.	.|.	.|.	.|.	.|.	.|.	.|.	.|.	22|22	.|.	28|22	.|.	28|28	.|.	.|.	.|.	28|26	.|.	.|.	.|.	.|.	.|.	.|.	.|.	.|.	28|22	.|.	28|22	.|.	.|.	28|24	28|22	.|.
chr12:98330771-98330827	.|.	.|.	.|.	.|.	.|.	.|.	.|.	.|.	.|.	.|.	.|.	.|.	.|.	.|.	.|.	.|.	.|.	.|.	.|.	.|.	.|.	.|.	.|.	.|.	.|.	.|.	.|.	.|.	.|.	.|.	52|58	.|.	.|.	.|.	.|.	.|.	56|64	.|.	64|66	.|.	.|.	.|.	.|.	.|.	.|.	.|.	.|.	.|.	.|.
chr12:99515099-99515135	.|.	.|.	.|.	.|.	40|44	.|.	.|.	.|.	.|.	.|.	.|.	.|.	.|.	.|.	.|.	.|.	.|.	.|.	.|.	32|30	.|.	.|.	.|.	.|.	.|.	.|.	.|.	.|.	.|.	.|.	42|44	.|.	.|.	.|.	.|.	.|.	.|.	.|.	.|.	.|.	.|.	.|.	.|.	.|.	.|.	32|34	.|.	.|.	.|.
chr12:99595699-99595723	.|.	.|.	.|.	.|.	.|.	.|.	.|.	.|.	.|.	.|.	.|.	.|.	.|.	.|.	.|.	.|.	.|.	.|.	.|.	.|.	.|.	.|.	.|.	.|.	.|.	.|.	.|.	.|.	.|.	.|.	.|.	.|.	.|.	.|.	.|.	.|.	.|.	.|.	.|.	.|.	.|.	.|.	.|.	.|.	.|.	.|.	.|.	.|.	.|.
chr13:100160658-100160698	.|.	.|.	.|.	.|.	.|.	.|.	.|.	.|.	.|.	.|.	.|.	.|.	.|.	.|.	.|.	.|.	.|.	.|.	.|.	.|.	.|.	.|.	.|.	.|.	.|.	.|.	.|.	.|.	.|.	.|.	.|.	.|.	.|.	.|.	.|.	.|.	.|.	.|.	36|36	32|36	.|.	.|.	.|.	.|.	.|.	.|.	.|.	.|.	.|.
chr13:100204845-100204873	.|.	.|.	.|.	.|.	.|.	.|.	.|.	.|.	28|28	28|28	.|.	.|.	28|28	.|.	28|28	.|.	.|.	.|.	.|.	28|28	.|.	28|28	.|.	.|.	.|.	28|28	.|.	28|28	.|.	.|.	.|.	.|.	28|28	.|.	.|.	.|.	.|.	28|28	28|28	.|.	28|28	.|.	.|.	28|28	.|.	.|.	.|.	28|28	.|.
chr13:100445287-100445321	.|.	.|.	.|.	.|.	.|.	.|.	.|.	.|.	.|.	.|.	.|.	36|38	.|.	.|.	.|.	.|.	.|.	.|.	.|.	.|.	.|.	.|.	.|.	36|38	.|.	.|.	.|.	.|.	.|.	.|.	.|.	.|.	.|.	.|.	.|.	.|.	.|.	.|.	32|32	.|.	.|.	36|38	.|.	.|.	.|.	.|.	.|.	.|.	.|.
chr13:100777389-100777415	.|.	.|.	.|.	.|.	.|.	.|.	.|.	.|.	.|.	.|.	.|.	.|.	.|.	.|.	.|.	.|.	.|.	.|.	.|.	.|.	.|.	.|.	36|38	.|.	.|.	.|.	.|.	.|.	.|.	.|.	.|.	.|.	.|.	.|.	.|.	.|.	.|.	.|.	.|.	.|.	.|.	.|.	.|.	.|.	.|.	.|.	.|.	.|.	.|.
chr13:101176628-101176666	.|.	.|.	.|.	.|.	.|.	.|.	.|.	.|.	.|.	.|.	.|.	.|.	.|.	.|.	.|.	.|.	.|.	.|.	.|.	.|.	.|.	.|.	.|.	.|.	.|.	.|.	40|44	.|.	.|.	.|.	.|.	.|.	.|.	.|.	.|.	.|.	.|.	.|.	.|.	.|.	.|.	.|.	.|.	.|.	.|.	.|.	.|.	.|.	.|.
chr13:101202553-101202609	.|.	.|.	.|.	.|.	.|.	44|44	.|.	.|.	.|.	.|.	.|.	42|44	.|.	.|.	.|.	.|.	.|.	.|.	42|44	.|.	.|.	.|.	40|38	.|.	.|.	.|.	.|.	40|38	.|.	.|.	.|.	.|.	.|.	.|.	.|.	.|.	42|44	.|.	42|44	.|.	44|46	40|36	.|.	.|.	42|44	.|.	.|.	.|.	.|.
chr13:101264908-101264948	.|.	.|.	.|.	.|.	.|.	.|.	.|.	.|.	.|.	34|36	.|.	.|.	36|36	.|.	32|32	.|.	.|.	.|.	.|.	32|36	.|.	.|.	.|.	.|.	.|.	.|.	.|.	.|.	.|.	.|.	32|32	.|.	32|32	.|.	.|.	36|36	.|.	.|.	32|32	.|.	.|.	.|.	.|.	32|34	.|.	.|.	34|36	32|32	.|.
chr13:101271582-101271628	.|.	.|.	.|.	.|.	.|.	.|.	.|.	.|.	36|38	.|.	.|.	.|.	.|.	.|.	.|.	.|.	.|.	.|.	.|.	.|.	.|.	.|.	.|.	36|34	.|.	38|34	.|.	.|.	.|.	.|.	.|.	.|.	.|.	.|.	.|.	.|.	.|.	.|.	.|.	.|.	.|.	.|.	.|.	.|.	.|.	.|.	.|.	.|.	.|.
chr13:101592219-101592255	28|28	.|.	.|.	.|.	.|.	.|.	.|.	28|26	.|.	28|26	.|.	28|28	.|.	28|26	.|.	.|.	.|.	.|.	.|.	28|26	.|.	.|.	.|.	.|.	.|.	.|.	28|26	.|.	.|.	.|.	.|.	.|.	28|28	28|28	.|.	28|26	.|.	.|.	.|.	28|26	.|.	28|28	.|.	.|.	28|28	28|28	28|28	.|.	28|28
chr13:101939215-101939249	.|.	.|.	.|.	.|.	.|.	.|.	.|.	.|.	.|.	.|.	.|.	.|.	.|.	.|.	.|.	.|.	.|.	.|.	.|.	.|.	.|.	28|32	.|.	.|.	.|.	.|.	.|.	.|.	.|.	.|.	.|.	.|.	.|.	.|.	.|.	.|.	.|.	.|.	.|.	.|.	.|.	.|.	.|.	.|.	.|.	.|.	.|.	.|.	.|.
chr13:101951777-101951805	.|.	.|.	.|.	.|.	.|.	.|.	28|28	28|28	.|.	.|.	.|.	.|.	.|.	.|.	.|.	.|.	.|.	.|.	.|.	.|.	.|.	.|.	28|28	.|.	.|.	.|.	.|.	.|.	.|.	.|.	.|.	.|.	.|.	.|.	.|.	28|24	.|.	.|.	28|28	.|.	.|.	.|.	.|.	.|.	.|.	.|.	.|.	.|.	.|.
chr13:102550691-102550725	.|.	.|.	.|.	.|.	.|.	34|32	.|.	.|.	.|.	.|.	.|.	.|.	.|.	.|.	.|.	.|.	.|.	.|.	.|.	.|.	.|.	.|.	.|.	.|.	.|.	.|.	.|.	.|.	.|.	.|.	.|.	.|.	.|.	.|.	.|.	34|30	.|.	34|32	.|.	.|.	.|.	.|.	.|.	.|.	.|.	.|.	.|.	.|.	.|.
chr13:102818155-102818179	.|.	.|.	.|.	.|.	.|.	.|.	.|.	.|.	.|.	.|.	.|.	.|.	24|21	.|.	.|.	.|.	.|.	24|21	.|.	.|.	.|.	.|.	.|.	24|24	.|.	.|.	.|.	.|.	.|.	.|.	.|.	.|.	24|24	.|.	24|24	.|.	24|21	.|.	24|24	24|24	24|24	24|24	.|.	.|.	24|21	.|.	24|24	24|24	.|.
chr13:103335918-103335952	.|.	.|.	.|.	.|.	.|.	.|.	.|.	.|.	.|.	.|.	.|.	26|28	.|.	.|.	.|.	.|.	.|.	.|.	.|.	.|.	26|28	.|.	.|.	.|.	.|.	.|.	.|.	.|.	26|28	.|.	.|.	.|.	.|.	.|.	.|.	.|.	.|.	.|.	.|.	.|.	.|.	.|.	.|.	.|.	.|.	.|.	.|.	.|.	.|.
chr13:103873974-103874006	.|.	.|.	.|.	.|.	.|.	34|36	.|.	.|.	.|.	.|.	32|32	.|.	.|.	.|.	.|.	.|.	.|.	.|.	.|.	.|.	.|.	.|.	.|.	.|.	.|.	.|.	.|.	.|.	.|.	.|.	.|.	.|.	.|.	.|.	.|.	.|.	.|.	.|.	.|.	.|.	.|.	.|.	.|.	.|.	.|.	.|.	.|.	.|.	.|.
chr13:104178603-104178649	.|.	.|.	.|.	.|.	.|.	.|.	.|.	.|.	.|.	.|.	.|.	.|.	.|.	.|.	.|.	46|48	.|.	.|.	.|.	40|44	.|.	.|.	.|.	.|.	.|.	.|.	.|.	.|.	.|.	.|.	.|.	.|.	.|.	.|.	.|.	.|.	.|.	.|.	.|.	.|.	.|.	.|.	.|.	.|.	.|.	.|.	.|.	.|.	.|.
chr13:104210578-104210602	.|.	.|.	.|.	.|.	.|.	.|.	.|.	.|.	.|.	.|.	.|.	24|24	.|.	.|.	.|.	.|.	.|.	.|.	.|.	.|.	.|.	.|.	.|.	.|.	.|.	.|.	.|.	.|.	.|.	.|.	.|.	.|.	.|.	.|.	.|.	.|.	.|.	.|.	.|.	.|.	.|.	.|.	.|.	.|.	.|.	.|.	.|.	.|.	.|.
chr13:104261023-104261063	.|.	.|.	.|.	.|.	.|.	26|28	.|.	.|.	.|.	.|.	.|.	.|.	.|.	.|.	.|.	.|.	.|.	.|.	.|.	.|.	.|.	.|.	.|.	.|.	.|.	.|.	.|.	.|.	.|.	.|.	.|.	.|.	.|.	.|.	.|.	.|.	.|.	.|.	.|.	.|.	.|.	.|.	.|.	.|.	.|.	.|.	30|32	.|.	.|.
chr13:104267796-104267832	.|.	.|.	.|.	.|.	.|.	.|.	.|.	.|.	.|.	.|.	.|.	.|.	.|.	.|.	.|.	.|.	.|.	.|.	.|.	.|.	.|.	.|.	.|.	.|.	.|.	.|.	22|24	.|.	.|.	.|.	.|.	.|.	22|24	.|.	.|.	.|.	.|.	.|.	.|.	.|.	.|.	.|.	.|.	.|.	.|.	.|.	.|.	.|.	.|.
chr13:104514221-104514249	24|26	.|.	.|.	.|.	.|.	.|.	.|.	.|.	.|.	.|.	.|.	.|.	24|26	.|.	.|.	.|.	.|.	.|.	.|.	.|.	.|.	24|26	.|.	.|.	.|.	.|.	.|.	24|26	24|26	.|.	24|26	26|26	24|26	.|.	.|.	.|.	.|.	.|.	.|.	24|26	24|26	.|.	.|.	24|26	.|.	22|26	24|26	24|26	.|.
chr13:105151235-105151263	.|.	.|.	.|.	.|.	.|.	16|16	.|.	.|.	.|.	.|.	.|.	.|.	.|.	.|.	.|.	.|.	16|16	.|.	.|.	.|.	.|.	.|.	.|.	.|.	.|.	.|.	.|.	.|.	28|30	16|16	30|30	.|.	.|.	.|.	.|.	16|16	.|.	.|.	.|.	.|.	16|30	.|.	.|.	16|16	.|.	.|.	.|.	.|.	.|.
chr13:105183650-105183676	.|.	.|.	.|.	.|.	.|.	.|.	.|.	.|.	.|.	.|.	.|.	.|.	.|.	.|.	.|.	.|.	.|.	.|.	.|.	.|.	.|.	22|24	.|.	.|.	.|.	.|.	.|.	.|.	.|.	.|.	.|.	.|.	.|.	.|.	.|.	.|.	.|.	.|.	.|.	.|.	.|.	.|.	.|.	.|.	.|.	.|.	.|.	.|.	.|.
chr13:105296999-105297033	30|30	.|.	28|30	.|.	.|.	26|30	.|.	.|.	28|30	.|.	.|.	30|32	.|.	.|.	.|.	.|.	.|.	.|.	.|.	28|30	28|30	.|.	30|32	28|30	.|.	30|32	.|.	.|.	.|.	.|.	28|30	.|.	.|.	.|.	.|.	30|32	.|.	.|.	.|.	30|32	.|.	.|.	.|.	28|30	.|.	.|.	28|30	28|30	.|.
chr13:105361163-105361193	.|.	.|.	26|28	.|.	.|.	.|.	.|.	.|.	.|.	24|26	.|.	26|28	.|.	.|.	.|.	.|.	.|.	.|.	.|.	.|.	.|.	24|26	.|.	26|28	.|.	26|28	.|.	.|.	.|.	.|.	.|.	.|.	24|26	.|.	.|.	24|26	24|26	.|.	24|26	24|26	26|28	.|.	26|28	26|28	26|28	26|26	24|26	.|.	26|28
chr13:105661431-105661461	.|.	.|.	.|.	.|.	.|.	.|.	.|.	.|.	.|.	.|.	.|.	.|.	.|.	.|.	.|.	.|.	.|.	.|.	.|.	.|.	.|.	.|.	26|28	.|.	26|28	.|.	.|.	.|.	.|.	.|.	.|.	.|.	.|.	.|.	.|.	.|.	.|.	.|.	.|.	.|.	.|.	.|.	.|.	.|.	.|.	.|.	.|.	.|.	.|.
chr13:105724327-105724351	.|.	.|.	.|.	.|.	.|.	.|.	18|18	.|.	.|.	.|.	.|.	18|18	.|.	.|.	.|.	.|.	.|.	.|.	.|.	.|.	.|.	18|18	.|.	.|.	18|18	.|.	18|18	.|.	.|.	.|.	.|.	.|.	.|.	.|.	18|18	18|18	18|18	.|.	18|18	.|.	18|18	.|.	.|.	.|.	.|.	.|.	16|18	.|.	.|.
chr13:106011424-106011460	.|.	.|.	.|.	.|.	.|.	.|.	.|.	.|.	.|.	.|.	.|.	.|.	.|.	.|.	.|.	.|.	.|.	.|.	.|.	.|.	.|.	.|.	.|.	.|.	.|.	.|.	.|.	.|.	.|.	.|.	.|.	.|.	30|30	.|.	.|.	30|30	.|.	.|.	.|.	.|.	48|50	.|.	.|.	.|.	48|50	.|.	.|.	.|.	.|.
chr13:106265375-106265399	22|26	26|26	24|26	22|22	26|26	.|.	24|26	24|26	22|22	24|26	.|.	22|22	22|22	.|.	22|26	20|20	.|.	22|22	.|.	22|26	24|26	22|26	22|26	22|22	.|.	22|22	22|26	22|22	22|22	.|.	22|22	24|26	22|22	22|22	26|26	22|26	24|26	.|.	22|22	22|22	22|26	22|22	22|26	22|22	.|.	22|22	22|26	26|26	20|22
chr13:106833520-106833544	.|.	.|.	26|26	.|.	.|.	.|.	.|.	26|26	26|26	.|.	.|.	.|.	.|.	.|.	.|.	.|.	.|.	.|.	26|26	.|.	26|26	.|.	.|.	.|.	26|26	26|26	.|.	.|.	26|26	.|.	.|.	.|.	.|.	.|.	.|.	.|.	.|.	.|.	.|.	.|.	.|.	.|.	26|26	26|26	.|.	24|26	24|26	.|.	.|.
chr13:106891663-106891687	.|.	.|.	.|.	.|.	.|.	.|.	.|.	.|.	.|.	.|.	.|.	.|.	.|.	.|.	.|.	.|.	.|.	.|.	.|.	.|.	.|.	.|.	.|.	.|.	.|.	22|22	.|.	.|.	.|.	.|.	.|.	.|.	.|.	.|.	.|.	.|.	.|.	.|.	.|.	.|.	.|.	.|.	.|.	.|.	.|.	.|.	.|.	.|.	.|.
chr13:107115954-107115990	.|.	26|28	.|.	.|.	.|.	.|.	.|.	.|.	.|.	.|.	.|.	.|.	.|.	.|.	.|.	.|.	.|.	.|.	.|.	40|40	38|40	28|28	28|28	36|38	.|.	28|28	28|40	.|.	.|.	.|.	42|42	.|.	.|.	.|.	28|28	28|28	.|.	.|.	28|28	.|.	28|28	.|.	.|.	.|.	.|.	.|.	.|.	40|42	.|.
chr13:108074821-108074851	.|.	.|.	.|.	.|.	.|.	.|.	.|.	.|.	.|.	.|.	.|.	.|.	27|27	30|30	.|.	.|.	.|.	.|.	.|.	.|.	30|30	.|.	.|.	.|.	.|.	.|.	.|.	.|.	.|.	.|.	.|.	.|.	30|30	.|.	.|.	.|.	.|.	.|.	.|.	.|.	30|30	.|.	27|27	.|.	.|.	.|.	.|.	.|.	.|.
chr13:108098753-108098783	34|28	28|28	.|.	34|26	34|34	34|34	34|34	.|.	34|34	34|34	.|.	28|28	.|.	.|.	.|.	.|.	.|.	.|.	28|28	34|28	28|28	.|.	34|34	34|28	34|28	34|28	34|28	28|28	28|28	.|.	28|28	.|.	34|28	34|28	34|28	34|28	34|28	.|.	34|28	34|28	34|28	34|28	34|28	34|28	34|34	34|28	34|28	.|.	34|34
chr13:108348899-108348937	.|.	.|.	.|.	.|.	.|.	.|.	.|.	.|.	.|.	.|.	.|.	.|.	.|.	.|.	.|.	.|.	.|.	.|.	.|.	.|.	.|.	.|.	.|.	.|.	.|.	.|.	.|.	32|32	.|.	.|.	.|.	.|.	.|.	.|.	.|.	.|.	32|32	.|.	32|32	.|.	.|.	.|.	.|.	.|.	.|.	.|.	.|.	.|.	.|.
chr13:108373457-108373497	.|.	.|.	.|.	.|.	.|.	.|.	.|.	.|.	.|.	.|.	.|.	.|.	.|.	.|.	.|.	.|.	.|.	.|.	.|.	.|.	.|.	.|.	.|.	.|.	.|.	.|.	.|.	.|.	.|.	.|.	.|.	.|.	.|.	.|.	34|36	.|.	.|.	.|.	.|.	.|.	.|.	.|.	.|.	.|.	.|.	.|.	.|.	.|.	.|.
chr13:108476325-108476352	.|.	.|.	.|.	.|.	27|27	.|.	.|.	27|27	.|.	27|27	.|.	.|.	.|.	.|.	.|.	.|.	.|.	.|.	.|.	.|.	.|.	.|.	.|.	.|.	.|.	.|.	.|.	.|.	.|.	.|.	.|.	.|.	.|.	.|.	.|.	.|.	.|.	.|.	.|.	.|.	.|.	.|.	.|.	.|.	.|.	.|.	.|.	.|.	.|.
chr13:108571509-108571539	.|.	25|25	.|.	.|.	.|.	.|.	.|.	.|.	.|.	.|.	.|.	25|25	.|.	.|.	.|.	.|.	.|.	.|.	.|.	.|.	.|.	.|.	.|.	.|.	.|.	25|25	.|.	.|.	.|.	.|.	.|.	.|.	.|.	.|.	.|.	.|.	.|.	25|25	25|25	.|.	.|.	.|.	.|.	.|.	.|.	.|.	.|.	.|.	.|.
chr13:108612305-108612337	.|.	.|.	.|.	.|.	.|.	.|.	.|.	.|.	.|.	.|.	.|.	.|.	.|.	.|.	.|.	.|.	.|.	.|.	.|.	.|.	.|.	.|.	.|.	.|.	.|.	.|.	.|.	.|.	.|.	.|.	.|.	.|.	.|.	.|.	.|.	.|.	.|.	.|.	.|.	.|.	.|.	.|.	.|.	.|.	.|.	.|.	.|.	.|.	.|.
chr13:108679722-108679748	.|.	.|.	24|24	.|.	.|.	.|.	.|.	.|.	.|.	.|.	.|.	.|.	.|.	.|.	.|.	.|.	26|26	.|.	24|24	.|.	.|.	26|26	.|.	24|24	.|.	.|.	.|.	.|.	.|.	.|.	.|.	.|.	.|.	.|.	.|.	.|.	.|.	.|.	.|.	.|.	.|.	.|.	.|.	24|24	.|.	.|.	.|.	.|.	.|.
chr13:108721670-108721696	.|.	.|.	.|.	.|.	.|.	.|.	.|.	.|.	.|.	.|.	.|.	26|26	.|.	.|.	.|.	.|.	.|.	.|.	.|.	22|24	.|.	.|.	.|.	.|.	.|.	.|.	24|24	.|.	.|.	.|.	.|.	24|26	.|.	.|.	.|.	.|.	.|.	.|.	.|.	.|.	24|24	.|.	.|.	.|.	.|.	.|.	.|.	.|.	.|.
chr13:108910232-108910262	.|.	.|.	.|.	.|.	.|.	.|.	.|.	.|.	.|.	.|.	.|.	.|.	30|28	.|.	.|.	.|.	30|32	.|.	30|32	.|.	.|.	30|32	.|.	32|34	.|.	30|32	30|32	30|32	.|.	.|.	30|32	30|32	30|32	30|32	.|.	.|.	.|.	.|.	.|.	.|.	.|.	30|32	30|32	30|28	.|.	.|.	.|.	32|32	30|32
chr13:109227017-109227057	.|.	.|.	.|.	.|.	.|.	.|.	.|.	40|38	.|.	.|.	.|.	.|.	.|.	.|.	.|.	30|32	.|.	.|.	.|.	32|28	.|.	.|.	.|.	40|42	.|.	.|.	.|.	.|.	.|.	.|.	40|42	30|32	.|.	.|.	.|.	.|.	.|.	.|.	.|.	.|.	30|32	40|42	.|.	.|.	.|.	.|.	.|.	.|.	.|.
chr13:109277132-109277174	.|.	.|.	34|36	.|.	.|.	.|.	.|.	.|.	.|.	.|.	.|.	.|.	.|.	.|.	.|.	.|.	30|30	.|.	.|.	.|.	.|.	.|.	.|.	.|.	.|.	.|.	.|.	.|.	.|.	.|.	.|.	.|.	.|.	.|.	.|.	.|.	.|.	.|.	.|.	.|.	.|.	.|.	.|.	.|.	.|.	.|.	.|.	.|.	.|.
chr13:109310774-109310806	.|.	.|.	.|.	.|.	.|.	.|.	.|.	.|.	.|.	.|.	.|.	.|.	40|42	.|.	.|.	.|.	.|.	.|.	.|.	.|.	.|.	.|.	.|.	.|.	.|.	.|.	.|.	.|.	.|.	.|.	.|.	.|.	.|.	.|.	.|.	.|.	.|.	.|.	.|.	.|.	.|.	.|.	.|.	.|.	38|42	.|.	.|.	.|.	.|.
chr13:109328720-109328754	.|.	28|28	.|.	.|.	.|.	.|.	.|.	.|.	.|.	.|.	.|.	.|.	.|.	.|.	.|.	.|.	.|.	.|.	44|48	42|46	.|.	.|.	.|.	.|.	.|.	.|.	.|.	.|.	.|.	.|.	.|.	.|.	.|.	.|.	.|.	.|.	.|.	.|.	.|.	.|.	.|.	.|.	44|48	40|48	.|.	.|.	.|.	.|.	.|.
chr13:110114870-110114894	.|.	.|.	.|.	.|.	.|.	.|.	.|.	.|.	.|.	.|.	.|.	.|.	.|.	.|.	.|.	.|.	.|.	.|.	.|.	42|44	.|.	.|.	.|.	.|.	30|44	.|.	.|.	.|.	.|.	.|.	.|.	.|.	30|30	.|.	.|.	.|.	.|.	.|.	42|44	.|.	.|.	.|.	.|.	.|.	.|.	.|.	.|.	.|.	.|.
chr13:110428100-110428146	.|.	.|.	.|.	.|.	.|.	.|.	.|.	.|.	.|.	.|.	.|.	38|40	.|.	.|.	.|.	.|.	.|.	.|.	.|.	32|32	30|32	.|.	.|.	.|.	30|32	.|.	30|32	.|.	30|32	.|.	36|40	.|.	.|.	.|.	.|.	32|40	38|38	.|.	.|.	30|32	30|34	36|40	.|.	.|.	.|.	.|.	.|.	.|.	.|.
chr13:111499285-111499311	.|.	.|.	.|.	.|.	.|.	.|.	30|32	.|.	.|.	.|.	.|.	.|.	.|.	.|.	.|.	.|.	.|.	22|22	.|.	.|.	.|.	.|.	.|.	.|.	.|.	.|.	.|.	.|.	.|.	.|.	.|.	.|.	.|.	.|.	.|.	.|.	.|.	.|.	.|.	.|.	.|.	.|.	28|30	.|.	.|.	.|.	.|.	.|.	.|.
chr13:113129834-113129862	28|28	24|24	.|.	26|26	24|26	24|24	.|.	26|26	26|26	26|26	24|24	24|26	24|24	26|26	.|.	24|24	.|.	.|.	.|.	24|26	24|24	26|26	26|26	24|24	26|26	24|24	24|26	24|26	24|26	.|.	24|26	24|24	24|26	24|26	24|26	26|26	24|26	22|24	24|26	24|26	24|26	24|26	24|26	24|24	.|.	24|26	24|26	24|24	26|26
chr13:19490699-19490733	.|.	.|.	.|.	.|.	.|.	.|.	.|.	.|.	.|.	.|.	.|.	.|.	.|.	.|.	.|.	.|.	.|.	.|.	.|.	.|.	.|.	.|.	.|.	.|.	.|.	.|.	.|.	.|.	.|.	.|.	.|.	.|.	.|.	.|.	.|.	.|.	.|.	.|.	.|.	.|.	.|.	.|.	.|.	.|.	.|.	32|34	.|.	34|36	.|.
chr13:19555280-19555310	.|.	.|.	.|.	.|.	.|.	.|.	.|.	.|.	.|.	.|.	.|.	.|.	.|.	24|24	.|.	.|.	.|.	.|.	22|24	.|.	.|.	.|.	.|.	.|.	.|.	.|.	.|.	.|.	.|.	.|.	.|.	.|.	.|.	.|.	.|.	.|.	.|.	.|.	.|.	.|.	.|.	.|.	.|.	.|.	.|.	.|.	.|.	.|.	.|.
chr13:19674953-19674991	.|.	20|20	20|20	.|.	.|.	.|.	.|.	.|.	34|34	34|34	.|.	.|.	.|.	.|.	.|.	.|.	.|.	.|.	.|.	32|34	20|34	.|.	.|.	20|34	.|.	20|20	32|34	34|34	34|34	.|.	34|34	.|.	20|34	.|.	.|.	20|20	32|34	.|.	.|.	.|.	20|34	34|34	20|20	34|34	20|34	32|34	20|20	20|20	.|.
chr13:19921378-19921410	24|26	.|.	26|26	.|.	.|.	24|26	.|.	.|.	24|26	.|.	.|.	.|.	.|.	.|.	26|28	28|34	.|.	.|.	.|.	32|26	32|34	.|.	32|34	24|26	.|.	.|.	32|34	.|.	.|.	.|.	30|34	.|.	.|.	26|26	.|.	.|.	.|.	.|.	24|26	.|.	26|26	.|.	.|.	24|26	32|34	32|34	.|.	32|34	.|.
chr13:20825713-20825737	.|.	.|.	24|24	24|24	.|.	.|.	.|.	.|.	.|.	24|24	.|.	.|.	.|.	.|.	.|.	.|.	.|.	.|.	.|.	24|24	.|.	.|.	.|.	.|.	.|.	.|.	.|.	24|24	24|24	.|.	24|24	.|.	24|24	.|.	.|.	.|.	.|.	24|24	.|.	24|24	24|24	.|.	24|24	.|.	.|.	24|24	.|.	24|24	24|24
chr13:21040821-21040849	50|48	.|.	.|.	.|.	.|.	.|.	.|.	.|.	50|48	.|.	.|.	.|.	.|.	42|40	.|.	.|.	.|.	.|.	.|.	.|.	.|.	.|.	.|.	.|.	.|.	.|.	.|.	.|.	.|.	.|.	.|.	.|.	.|.	.|.	.|.	.|.	.|.	.|.	.|.	.|.	.|.	.|.	.|.	42|42	.|.	.|.	.|.	.|.	.|.
chr13:21689510-21689538	.|.	.|.	.|.	.|.	.|.	.|.	.|.	.|.	.|.	.|.	.|.	.|.	.|.	.|.	.|.	.|.	24|26	.|.	.|.	.|.	.|.	26|26	.|.	.|.	.|.	.|.	.|.	.|.	.|.	.|.	.|.	.|.	.|.	.|.	.|.	.|.	.|.	.|.	.|.	.|.	.|.	.|.	.|.	.|.	.|.	.|.	.|.	.|.	.|.
chr13:22383064-22383100	.|.	.|.	.|.	.|.	.|.	.|.	.|.	.|.	.|.	.|.	.|.	.|.	.|.	.|.	.|.	.|.	.|.	.|.	.|.	46|48	.|.	40|40	.|.	.|.	.|.	40|40	.|.	38|40	44|46	.|.	.|.	.|.	.|.	.|.	.|.	.|.	.|.	.|.	.|.	36|40	40|40	.|.	.|.	44|48	.|.	.|.	50|52	.|.	.|.
chr13:22463641-22463677	.|.	.|.	.|.	.|.	.|.	.|.	.|.	.|.	.|.	.|.	.|.	.|.	.|.	.|.	.|.	.|.	.|.	.|.	.|.	22|22	.|.	.|.	.|.	.|.	.|.	.|.	22|24	.|.	30|30	.|.	.|.	.|.	.|.	.|.	.|.	.|.	.|.	.|.	.|.	.|.	.|.	.|.	30|30	.|.	.|.	.|.	.|.	20|24	.|.
chr13:22734923-22734973	58|60	.|.	.|.	.|.	.|.	58|60	.|.	.|.	.|.	.|.	.|.	.|.	.|.	.|.	.|.	.|.	.|.	.|.	58|60	58|60	.|.	38|36	.|.	.|.	54|60	.|.	.|.	.|.	38|36	.|.	.|.	.|.	38|38	.|.	.|.	.|.	.|.	.|.	.|.	.|.	.|.	.|.	.|.	.|.	.|.	.|.	.|.	.|.	.|.
chr13:22740466-22740510	.|.	.|.	.|.	.|.	.|.	.|.	.|.	.|.	.|.	.|.	.|.	.|.	.|.	.|.	.|.	.|.	.|.	.|.	.|.	.|.	.|.	44|46	.|.	.|.	60|64	.|.	.|.	.|.	.|.	.|.	.|.	.|.	.|.	.|.	.|.	.|.	.|.	.|.	.|.	.|.	.|.	.|.	.|.	.|.	.|.	.|.	.|.	.|.	.|.
chr13:22842598-22842640	.|.	38|40	.|.	.|.	.|.	.|.	.|.	42|42	.|.	.|.	42|32	32|32	.|.	.|.	.|.	.|.	32|32	.|.	42|40	32|32	.|.	42|32	.|.	32|32	42|32	.|.	.|.	28|32	42|42	.|.	.|.	32|32	42|40	.|.	.|.	42|42	.|.	.|.	.|.	.|.	42|42	.|.	42|42	.|.	42|40	.|.	42|36	.|.	.|.
chr13:24345669-24345707	.|.	.|.	.|.	26|26	24|26	.|.	.|.	.|.	.|.	.|.	.|.	.|.	.|.	.|.	.|.	.|.	.|.	.|.	.|.	.|.	.|.	.|.	.|.	.|.	24|26	.|.	.|.	.|.	.|.	.|.	.|.	.|.	.|.	.|.	.|.	.|.	26|28	.|.	.|.	.|.	.|.	.|.	.|.	.|.	24|26	.|.	.|.	.|.	.|.
chr13:24420965-24420992	.|.	.|.	.|.	.|.	.|.	.|.	.|.	.|.	.|.	.|.	.|.	.|.	.|.	.|.	.|.	.|.	.|.	.|.	.|.	.|.	.|.	.|.	24|24	.|.	24|24	.|.	.|.	.|.	.|.	.|.	.|.	.|.	.|.	.|.	.|.	.|.	.|.	.|.	.|.	.|.	.|.	.|.	.|.	.|.	.|.	.|.	.|.	.|.	.|.
chr13:24449166-24449202	.|.	.|.	.|.	.|.	.|.	.|.	.|.	32|34	.|.	30|34	.|.	.|.	34|34	.|.	.|.	30|34	.|.	.|.	.|.	.|.	.|.	.|.	36|36	.|.	.|.	32|34	30|34	.|.	.|.	.|.	.|.	.|.	.|.	.|.	.|.	.|.	.|.	.|.	.|.	.|.	.|.	.|.	.|.	.|.	.|.	.|.	.|.	.|.	.|.
chr13:25112734-25112778	36|36	.|.	.|.	.|.	.|.	.|.	.|.	.|.	.|.	44|44	.|.	.|.	.|.	.|.	30|30	.|.	.|.	.|.	.|.	.|.	.|.	.|.	.|.	44|42	30|32	.|.	.|.	44|42	.|.	.|.	.|.	.|.	30|30	.|.	44|46	30|32	44|42	.|.	42|46	.|.	44|42	44|32	30|30	44|44	.|.	42|46	44|42	.|.	.|.
chr13:25725787-25725817	.|.	.|.	.|.	.|.	.|.	.|.	.|.	.|.	.|.	.|.	.|.	.|.	.|.	.|.	.|.	.|.	.|.	.|.	30|32	.|.	.|.	.|.	.|.	.|.	.|.	.|.	28|32	.|.	20|20	.|.	.|.	.|.	20|20	.|.	.|.	.|.	.|.	.|.	.|.	.|.	.|.	.|.	.|.	.|.	32|34	.|.	.|.	.|.	.|.
chr13:25793980-25794016	.|.	.|.	.|.	.|.	36|38	.|.	.|.	.|.	.|.	36|38	.|.	.|.	.|.	36|38	.|.	34|38	.|.	.|.	.|.	.|.	.|.	.|.	.|.	.|.	.|.	26|28	.|.	.|.	36|38	.|.	.|.	.|.	.|.	.|.	.|.	.|.	.|.	.|.	.|.	.|.	.|.	.|.	.|.	.|.	.|.	.|.	.|.	.|.	.|.
chr13:26486293-26486333	.|.	.|.	.|.	.|.	.|.	.|.	.|.	.|.	.|.	.|.	.|.	.|.	.|.	.|.	.|.	.|.	.|.	.|.	30|36	.|.	.|.	.|.	.|.	.|.	.|.	.|.	34|34	.|.	.|.	.|.	.|.	.|.	.|.	.|.	.|.	.|.	.|.	.|.	.|.	32|32	.|.	.|.	.|.	.|.	.|.	.|.	.|.	.|.	.|.
chr13:27318738-27318768	.|.	.|.	.|.	.|.	.|.	.|.	.|.	.|.	.|.	.|.	.|.	.|.	.|.	.|.	.|.	.|.	.|.	.|.	.|.	.|.	.|.	.|.	.|.	.|.	.|.	.|.	.|.	.|.	.|.	.|.	.|.	.|.	.|.	.|.	.|.	.|.	.|.	.|.	.|.	.|.	.|.	.|.	.|.	.|.	.|.	.|.	.|.	.|.	.|.
chr13:28247003-28247041	.|.	.|.	32|34	.|.	.|.	.|.	.|.	.|.	.|.	.|.	.|.	.|.	.|.	.|.	.|.	.|.	.|.	.|.	.|.	.|.	.|.	.|.	.|.	.|.	.|.	.|.	.|.	36|36	.|.	.|.	.|.	.|.	.|.	.|.	.|.	.|.	.|.	.|.	.|.	.|.	.|.	.|.	.|.	.|.	.|.	.|.	.|.	34|36	.|.
chr13:28325310-28325360	.|.	.|.	.|.	.|.	.|.	.|.	.|.	.|.	.|.	.|.	.|.	34|34	.|.	.|.	.|.	.|.	.|.	.|.	.|.	.|.	.|.	.|.	.|.	.|.	.|.	.|.	.|.	.|.	.|.	.|.	.|.	.|.	.|.	.|.	.|.	.|.	.|.	.|.	.|.	.|.	.|.	.|.	.|.	.|.	.|.	.|.	.|.	.|.	.|.
chr13:28859571-28859595	.|.	.|.	.|.	.|.	.|.	.|.	.|.	.|.	24|24	.|.	.|.	.|.	.|.	.|.	24|24	.|.	.|.	.|.	.|.	.|.	.|.	.|.	.|.	.|.	.|.	.|.	.|.	24|24	.|.	.|.	.|.	.|.	.|.	.|.	.|.	.|.	.|.	.|.	.|.	.|.	.|.	.|.	.|.	.|.	.|.	.|.	.|.	.|.	.|.
chr13:29957354-29957390	.|.	.|.	.|.	.|.	.|.	.|.	.|.	.|.	.|.	.|.	.|.	.|.	.|.	.|.	.|.	.|.	.|.	.|.	.|.	.|.	.|.	36|38	.|.	.|.	.|.	.|.	.|.	.|.	38|38	.|.	.|.	.|.	.|.	.|.	.|.	.|.	.|.	36|38	.|.	.|.	.|.	.|.	.|.	.|.	.|.	.|.	.|.	.|.	.|.
chr13:30415397-30415421	.|.	.|.	.|.	.|.	20|20	.|.	.|.	.|.	.|.	.|.	.|.	.|.	.|.	.|.	.|.	.|.	.|.	.|.	.|.	.|.	.|.	20|20	.|.	.|.	20|22	.|.	.|.	.|.	.|.	.|.	.|.	.|.	.|.	.|.	.|.	.|.	.|.	.|.	.|.	.|.	.|.	.|.	.|.	.|.	.|.	.|.	.|.	.|.	.|.
chr13:30558583-30558613	25|25	.|.	.|.	.|.	.|.	.|.	.|.	.|.	.|.	.|.	.|.	.|.	.|.	.|.	.|.	.|.	.|.	.|.	.|.	30|30	.|.	.|.	30|30	.|.	.|.	.|.	.|.	30|30	.|.	.|.	.|.	.|.	.|.	.|.	.|.	30|30	.|.	.|.	.|.	.|.	30|30	25|25	.|.	30|30	.|.	.|.	.|.	.|.	.|.
chr13:30956769-30956793	.|.	.|.	.|.	.|.	24|24	.|.	.|.	.|.	.|.	.|.	.|.	.|.	.|.	.|.	.|.	.|.	.|.	.|.	.|.	.|.	24|24	.|.	.|.	.|.	.|.	.|.	24|24	.|.	.|.	24|24	.|.	.|.	.|.	.|.	.|.	.|.	.|.	.|.	.|.	.|.	.|.	.|.	.|.	.|.	.|.	.|.	.|.	24|24	24|24
chr13:31252529-31252563	34|32	.|.	.|.	.|.	34|32	.|.	.|.	28|28	.|.	.|.	.|.	.|.	.|.	.|.	34|32	.|.	.|.	.|.	.|.	.|.	.|.	.|.	32|32	.|.	.|.	30|30	.|.	.|.	.|.	32|32	28|30	.|.	.|.	.|.	.|.	28|28	.|.	30|32	.|.	.|.	.|.	.|.	.|.	28|28	.|.	28|32	.|.	.|.	.|.
chr13:31394433-31394473	.|.	36|40	.|.	.|.	32|32	.|.	.|.	.|.	.|.	.|.	.|.	.|.	38|40	.|.	30|36	.|.	.|.	.|.	.|.	.|.	.|.	38|40	.|.	.|.	.|.	.|.	30|32	.|.	32|32	40|36	40|34	.|.	36|42	32|34	32|34	.|.	.|.	.|.	.|.	.|.	30|34	.|.	32|34	40|38	32|34	.|.	.|.	38|30	36|40
chr13:31969860-31969886	.|.	.|.	.|.	.|.	.|.	.|.	.|.	.|.	.|.	.|.	.|.	26|24	.|.	.|.	.|.	.|.	.|.	.|.	.|.	.|.	.|.	.|.	.|.	.|.	.|.	22|24	.|.	.|.	.|.	.|.	.|.	.|.	.|.	.|.	.|.	.|.	.|.	.|.	.|.	.|.	.|.	.|.	.|.	.|.	.|.	.|.	.|.	.|.	.|.
chr13:32588310-32588358	.|.	.|.	.|.	.|.	.|.	.|.	.|.	.|.	.|.	.|.	.|.	52|56	.|.	.|.	.|.	.|.	.|.	.|.	.|.	.|.	.|.	.|.	.|.	.|.	.|.	.|.	.|.	.|.	.|.	.|.	.|.	.|.	.|.	.|.	.|.	.|.	.|.	.|.	.|.	.|.	.|.	.|.	.|.	.|.	.|.	.|.	.|.	.|.	.|.
chr13:32744660-32744685	.|.	.|.	.|.	.|.	.|.	.|.	.|.	.|.	.|.	.|.	25|25	.|.	.|.	.|.	.|.	.|.	.|.	.|.	.|.	.|.	.|.	.|.	.|.	.|.	25|25	.|.	.|.	.|.	25|25	.|.	.|.	.|.	.|.	.|.	.|.	.|.	.|.	.|.	25|25	25|25	.|.	.|.	.|.	.|.	.|.	.|.	.|.	.|.	.|.
chr13:32753640-32753678	.|.	.|.	.|.	.|.	.|.	.|.	.|.	.|.	.|.	.|.	.|.	.|.	.|.	40|42	.|.	.|.	.|.	.|.	.|.	42|44	40|42	.|.	.|.	.|.	.|.	.|.	.|.	.|.	.|.	.|.	38|42	.|.	.|.	.|.	.|.	.|.	.|.	.|.	.|.	.|.	.|.	.|.	.|.	.|.	.|.	.|.	.|.	.|.	.|.
chr13:33771553-33771583	.|.	.|.	34|38	.|.	.|.	.|.	.|.	.|.	.|.	.|.	.|.	.|.	.|.	.|.	.|.	.|.	.|.	.|.	.|.	.|.	.|.	.|.	.|.	.|.	.|.	.|.	.|.	.|.	.|.	.|.	.|.	.|.	.|.	.|.	.|.	.|.	.|.	.|.	.|.	.|.	.|.	.|.	.|.	.|.	.|.	.|.	.|.	.|.	.|.
chr13:33780503-33780533	.|.	.|.	.|.	.|.	26|28	.|.	.|.	.|.	.|.	.|.	.|.	.|.	.|.	.|.	.|.	.|.	.|.	.|.	.|.	26|28	.|.	.|.	.|.	.|.	.|.	.|.	.|.	.|.	.|.	.|.	.|.	.|.	.|.	.|.	.|.	.|.	.|.	.|.	.|.	.|.	.|.	.|.	.|.	.|.	.|.	.|.	.|.	.|.	.|.
chr13:33855543-33855577	.|.	28|28	.|.	.|.	.|.	.|.	.|.	.|.	.|.	.|.	.|.	.|.	.|.	.|.	.|.	.|.	.|.	.|.	.|.	.|.	.|.	.|.	.|.	.|.	.|.	44|46	42|44	.|.	.|.	.|.	.|.	.|.	.|.	.|.	.|.	.|.	.|.	.|.	.|.	.|.	28|28	.|.	.|.	.|.	.|.	.|.	.|.	.|.	.|.
chr13:34630063-34630087	.|.	.|.	.|.	.|.	.|.	.|.	.|.	.|.	.|.	.|.	.|.	.|.	.|.	.|.	.|.	.|.	.|.	.|.	.|.	.|.	.|.	22|22	26|26	22|22	.|.	26|26	24|26	.|.	26|26	.|.	.|.	.|.	.|.	.|.	.|.	22|22	.|.	.|.	.|.	26|26	26|26	.|.	.|.	.|.	.|.	.|.	22|22	.|.	.|.
chr13:35272127-35272173	.|.	.|.	.|.	42|40	.|.	42|40	.|.	.|.	42|40	.|.	.|.	.|.	.|.	.|.	.|.	.|.	.|.	.|.	.|.	.|.	.|.	.|.	.|.	.|.	.|.	.|.	50|54	.|.	50|54	.|.	.|.	.|.	.|.	.|.	.|.	.|.	.|.	50|52	.|.	.|.	.|.	50|54	.|.	.|.	.|.	.|.	48|52	.|.	.|.
chr13:35724930-35724965	.|.	.|.	.|.	.|.	40|40	40|40	.|.	.|.	.|.	35|35	.|.	40|40	.|.	35|35	40|40	.|.	40|40	.|.	.|.	.|.	.|.	.|.	35|35	40|40	.|.	.|.	.|.	.|.	.|.	.|.	.|.	.|.	35|35	.|.	.|.	40|40	.|.	.|.	35|35	40|40	.|.	.|.	35|35	.|.	.|.	.|.	40|40	35|40	40|40
chr13:35924865-35924909	.|.	.|.	.|.	.|.	.|.	.|.	46|50	48|48	.|.	.|.	.|.	.|.	.|.	.|.	.|.	.|.	.|.	.|.	.|.	.|.	.|.	48|48	.|.	.|.	.|.	46|50	.|.	.|.	.|.	.|.	.|.	.|.	.|.	46|48	.|.	.|.	.|.	.|.	.|.	.|.	.|.	.|.	.|.	46|50	.|.	.|.	.|.	.|.	.|.
chr13:36169084-36169128	.|.	.|.	.|.	.|.	.|.	.|.	.|.	.|.	.|.	.|.	.|.	.|.	.|.	.|.	.|.	.|.	.|.	.|.	.|.	.|.	.|.	.|.	.|.	.|.	.|.	.|.	.|.	.|.	.|.	.|.	.|.	.|.	.|.	.|.	.|.	.|.	.|.	38|40	.|.	38|40	36|38	.|.	.|.	.|.	.|.	.|.	.|.	.|.	.|.
chr13:36483734-36483776	.|.	.|.	.|.	.|.	.|.	.|.	.|.	.|.	.|.	.|.	.|.	.|.	.|.	.|.	.|.	.|.	.|.	.|.	.|.	.|.	.|.	.|.	.|.	.|.	.|.	.|.	.|.	.|.	.|.	.|.	.|.	25|26	.|.	.|.	.|.	.|.	.|.	.|.	.|.	.|.	.|.	.|.	.|.	.|.	.|.	.|.	.|.	.|.	.|.
chr13:36904566-36904590	24|22	.|.	.|.	.|.	.|.	.|.	.|.	.|.	.|.	24|22	.|.	.|.	20|22	20|22	20|22	.|.	.|.	.|.	.|.	24|22	.|.	24|22	.|.	20|22	24|22	.|.	24|22	.|.	20|22	24|22	.|.	24|22	.|.	.|.	.|.	.|.	24|22	.|.	20|22	.|.	22|22	20|22	20|22	22|22	20|22	.|.	.|.	20|22	.|.
chr13:37055172-37055240	.|.	.|.	.|.	.|.	.|.	.|.	.|.	52|52	.|.	.|.	.|.	52|52	60|60	60|60	.|.	.|.	.|.	.|.	.|.	52|52	.|.	52|52	.|.	52|60	.|.	.|.	.|.	52|60	60|60	.|.	60|60	.|.	.|.	.|.	.|.	60|60	52|52	.|.	60|60	.|.	52|60	.|.	.|.	.|.	.|.	52|60	60|60	.|.	.|.
chr13:37474821-37474863	30|30	.|.	.|.	.|.	.|.	.|.	.|.	.|.	.|.	.|.	.|.	.|.	.|.	.|.	.|.	.|.	.|.	.|.	.|.	.|.	.|.	.|.	.|.	.|.	.|.	.|.	.|.	.|.	.|.	.|.	28|30	.|.	.|.	.|.	.|.	.|.	30|30	.|.	.|.	30|30	.|.	.|.	.|.	.|.	.|.	.|.	.|.	.|.	.|.
chr13:37555111-37555136	.|.	.|.	.|.	.|.	.|.	.|.	.|.	.|.	.|.	.|.	25|25	.|.	.|.	.|.	.|.	.|.	.|.	.|.	.|.	.|.	.|.	.|.	.|.	.|.	.|.	25|25	.|.	25|25	.|.	.|.	25|25	.|.	.|.	25|25	25|25	.|.	.|.	25|25	.|.	.|.	.|.	.|.	.|.	25|25	.|.	.|.	25|25	25|25	.|.
chr13:37871031-37871055	.|.	.|.	.|.	.|.	.|.	.|.	.|.	.|.	.|.	.|.	.|.	.|.	.|.	.|.	.|.	.|.	.|.	.|.	.|.	.|.	.|.	.|.	.|.	.|.	.|.	26|26	.|.	.|.	.|.	.|.	.|.	.|.	.|.	.|.	.|.	.|.	.|.	.|.	.|.	.|.	.|.	.|.	.|.	.|.	.|.	.|.	.|.	.|.	.|.
chr13:37929207-37929231	.|.	24|24	24|24	.|.	.|.	.|.	.|.	.|.	.|.	.|.	.|.	.|.	.|.	.|.	.|.	.|.	.|.	.|.	.|.	.|.	.|.	.|.	.|.	.|.	.|.	.|.	.|.	24|24	.|.	.|.	.|.	.|.	24|24	.|.	.|.	.|.	.|.	.|.	24|24	.|.	24|24	24|24	24|24	.|.	24|24	.|.	24|24	24|24	24|24
chr13:37971520-37971562	.|.	.|.	.|.	.|.	.|.	.|.	.|.	.|.	32|34	.|.	.|.	.|.	.|.	.|.	.|.	.|.	.|.	.|.	.|.	.|.	.|.	.|.	.|.	.|.	32|34	.|.	.|.	.|.	.|.	.|.	.|.	.|.	34|34	.|.	.|.	.|.	.|.	.|.	.|.	.|.	.|.	.|.	.|.	.|.	.|.	.|.	.|.	.|.	.|.
chr13:38010811-38010835	.|.	.|.	.|.	.|.	.|.	.|.	.|.	.|.	.|.	.|.	.|.	.|.	.|.	.|.	.|.	.|.	.|.	.|.	.|.	.|.	.|.	.|.	24|24	.|.	.|.	.|.	.|.	.|.	.|.	.|.	.|.	.|.	.|.	.|.	.|.	.|.	.|.	.|.	.|.	.|.	.|.	.|.	.|.	.|.	.|.	.|.	.|.	.|.	.|.
chr13:38345695-38345725	.|.	.|.	.|.	20|20	26|28	.|.	.|.	.|.	.|.	.|.	.|.	.|.	.|.	.|.	.|.	.|.	.|.	.|.	.|.	20|20	.|.	.|.	20|20	.|.	.|.	.|.	.|.	.|.	.|.	.|.	26|28	.|.	20|20	.|.	.|.	.|.	.|.	.|.	.|.	.|.	.|.	.|.	.|.	.|.	.|.	.|.	.|.	.|.	.|.
chr13:38360426-38360470	.|.	30|30	.|.	.|.	.|.	.|.	.|.	.|.	.|.	.|.	.|.	.|.	.|.	.|.	.|.	.|.	.|.	.|.	.|.	.|.	.|.	.|.	.|.	.|.	.|.	.|.	.|.	.|.	.|.	.|.	.|.	.|.	.|.	.|.	.|.	.|.	28|30	.|.	.|.	.|.	.|.	.|.	.|.	30|34	.|.	.|.	34|34	.|.	.|.
chr13:38366860-38366896	.|.	32|32	.|.	.|.	.|.	.|.	.|.	.|.	.|.	.|.	.|.	.|.	.|.	.|.	.|.	.|.	.|.	.|.	.|.	.|.	.|.	.|.	32|32	.|.	.|.	.|.	.|.	.|.	.|.	.|.	.|.	.|.	.|.	.|.	.|.	.|.	30|32	.|.	.|.	.|.	.|.	.|.	.|.	.|.	.|.	.|.	.|.	.|.	.|.
chr13:38738617-38738669	.|.	.|.	.|.	.|.	.|.	36|36	.|.	.|.	.|.	.|.	.|.	.|.	.|.	.|.	.|.	.|.	.|.	40|40	.|.	.|.	.|.	.|.	.|.	.|.	.|.	.|.	.|.	.|.	.|.	36|40	.|.	.|.	.|.	.|.	.|.	.|.	.|.	.|.	.|.	.|.	.|.	.|.	.|.	.|.	.|.	.|.	.|.	.|.	.|.
chr13:38895100-38895128	.|.	.|.	.|.	.|.	.|.	.|.	.|.	.|.	.|.	.|.	.|.	.|.	.|.	.|.	.|.	.|.	.|.	28|28	28|28	.|.	.|.	.|.	28|28	.|.	.|.	.|.	.|.	.|.	.|.	.|.	.|.	.|.	.|.	.|.	.|.	.|.	.|.	.|.	.|.	.|.	28|28	.|.	.|.	.|.	.|.	.|.	.|.	.|.	.|.
chr13:39186793-39186847	.|.	.|.	.|.	.|.	.|.	.|.	.|.	.|.	.|.	.|.	.|.	.|.	.|.	.|.	.|.	.|.	.|.	.|.	.|.	46|50	.|.	.|.	.|.	.|.	.|.	.|.	.|.	.|.	.|.	.|.	40|44	.|.	.|.	.|.	.|.	.|.	.|.	.|.	.|.	.|.	.|.	.|.	.|.	.|.	.|.	.|.	.|.	.|.	.|.
chr13:39326001-39326033	.|.	.|.	.|.	.|.	.|.	.|.	22|22	.|.	.|.	.|.	.|.	22|22	.|.	.|.	.|.	.|.	.|.	.|.	.|.	.|.	.|.	.|.	.|.	.|.	.|.	.|.	.|.	.|.	24|26	.|.	.|.	.|.	.|.	.|.	.|.	.|.	22|22	24|26	.|.	.|.	.|.	.|.	.|.	.|.	.|.	.|.	.|.	.|.	.|.
chr13:39592610-39592654	.|.	.|.	.|.	.|.	.|.	.|.	.|.	.|.	.|.	.|.	.|.	.|.	.|.	.|.	.|.	.|.	.|.	.|.	.|.	.|.	.|.	.|.	.|.	46|46	.|.	44|46	.|.	.|.	.|.	.|.	.|.	.|.	.|.	.|.	.|.	.|.	.|.	.|.	.|.	.|.	.|.	.|.	.|.	.|.	.|.	.|.	.|.	.|.	.|.
chr13:39788681-39788717	.|.	.|.	.|.	.|.	.|.	.|.	.|.	.|.	.|.	.|.	.|.	.|.	.|.	.|.	30|32	.|.	.|.	.|.	.|.	36|28	.|.	.|.	.|.	.|.	.|.	.|.	38|38	.|.	.|.	.|.	.|.	.|.	36|40	.|.	.|.	.|.	.|.	.|.	.|.	.|.	.|.	.|.	.|.	.|.	.|.	.|.	.|.	.|.	.|.
chr13:40137228-40137276	.|.	.|.	.|.	.|.	.|.	.|.	.|.	.|.	.|.	.|.	.|.	.|.	.|.	.|.	.|.	54|56	.|.	.|.	.|.	48|52	.|.	46|44	46|52	.|.	.|.	.|.	54|56	.|.	50|54	.|.	50|54	.|.	.|.	.|.	.|.	.|.	.|.	.|.	.|.	.|.	.|.	.|.	.|.	.|.	.|.	.|.	.|.	.|.	.|.
chr13:40212682-40212726	.|.	.|.	.|.	.|.	.|.	.|.	.|.	.|.	36|38	.|.	.|.	.|.	.|.	.|.	.|.	.|.	.|.	.|.	.|.	32|34	.|.	.|.	.|.	.|.	.|.	32|34	36|38	.|.	.|.	.|.	.|.	.|.	38|40	.|.	.|.	36|38	.|.	.|.	.|.	.|.	.|.	.|.	34|36	.|.	36|38	36|38	.|.	.|.	.|.
chr13:40879185-40879209	.|.	.|.	.|.	.|.	24|24	.|.	.|.	.|.	.|.	.|.	.|.	.|.	.|.	.|.	.|.	.|.	.|.	.|.	.|.	.|.	.|.	.|.	.|.	.|.	.|.	.|.	.|.	.|.	.|.	27|27	.|.	.|.	.|.	.|.	.|.	.|.	.|.	.|.	.|.	.|.	.|.	.|.	.|.	.|.	.|.	.|.	.|.	.|.	.|.
chr13:41104089-41104119	22|24	.|.	.|.	.|.	.|.	.|.	.|.	.|.	.|.	.|.	.|.	22|24	.|.	.|.	.|.	.|.	.|.	.|.	.|.	.|.	.|.	.|.	.|.	.|.	.|.	.|.	24|28	.|.	.|.	.|.	.|.	.|.	.|.	.|.	.|.	.|.	.|.	.|.	.|.	.|.	.|.	.|.	.|.	.|.	.|.	.|.	.|.	.|.	.|.
chr13:41436114-41436146	.|.	.|.	.|.	.|.	.|.	.|.	.|.	.|.	.|.	30|30	.|.	.|.	28|30	.|.	.|.	28|28	.|.	.|.	.|.	.|.	.|.	.|.	.|.	.|.	.|.	.|.	.|.	.|.	.|.	.|.	.|.	.|.	.|.	.|.	32|32	.|.	.|.	.|.	.|.	.|.	.|.	.|.	.|.	.|.	.|.	30|32	.|.	.|.	.|.
chr13:41732142-41732184	.|.	.|.	.|.	.|.	.|.	.|.	.|.	.|.	.|.	.|.	.|.	.|.	.|.	.|.	.|.	.|.	.|.	.|.	.|.	.|.	.|.	.|.	.|.	.|.	.|.	.|.	.|.	.|.	.|.	.|.	.|.	.|.	.|.	.|.	.|.	.|.	.|.	.|.	.|.	.|.	.|.	.|.	.|.	.|.	.|.	.|.	.|.	.|.	.|.
chr13:41845190-41845228	.|.	.|.	.|.	.|.	.|.	.|.	.|.	.|.	.|.	.|.	.|.	.|.	.|.	30|32	.|.	.|.	.|.	40|42	.|.	.|.	.|.	.|.	.|.	.|.	.|.	.|.	40|42	.|.	.|.	.|.	.|.	.|.	.|.	30|32	.|.	.|.	.|.	.|.	.|.	.|.	.|.	.|.	.|.	40|42	.|.	.|.	.|.	.|.	.|.
chr13:42118865-42118909	.|.	40|42	.|.	.|.	.|.	.|.	34|34	.|.	.|.	.|.	.|.	.|.	.|.	.|.	32|34	.|.	.|.	.|.	.|.	40|42	.|.	.|.	.|.	34|34	34|34	.|.	.|.	.|.	.|.	.|.	30|34	.|.	32|32	.|.	.|.	34|34	.|.	40|42	40|42	.|.	38|42	40|42	.|.	42|42	30|34	.|.	.|.	.|.	.|.
chr13:42170924-42170968	34|36	.|.	.|.	.|.	32|30	32|36	34|38	32|36	32|36	34|30	32|34	32|28	.|.	34|30	.|.	.|.	.|.	.|.	32|36	32|36	34|30	34|30	34|38	.|.	32|28	34|30	32|36	34|38	34|30	.|.	32|36	34|30	32|36	.|.	32|28	34|38	36|30	.|.	34|30	34|30	32|36	32|38	32|36	32|30	34|38	32|36	32|36	32|36	32|38
chr13:42303934-42303978	56|58	.|.	.|.	.|.	.|.	.|.	.|.	.|.	.|.	.|.	.|.	.|.	.|.	.|.	.|.	.|.	.|.	.|.	.|.	.|.	.|.	.|.	34|36	.|.	.|.	.|.	.|.	.|.	.|.	.|.	.|.	56|60	.|.	.|.	.|.	.|.	.|.	.|.	34|34	.|.	.|.	.|.	.|.	.|.	50|54	.|.	.|.	.|.	.|.
chr13:42894042-42894086	.|.	.|.	.|.	.|.	.|.	.|.	.|.	.|.	.|.	.|.	.|.	.|.	54|58	.|.	.|.	.|.	.|.	.|.	.|.	.|.	60|64	.|.	.|.	.|.	52|62	.|.	.|.	48|52	50|52	.|.	54|64	.|.	56|58	.|.	.|.	54|60	.|.	.|.	.|.	.|.	.|.	.|.	.|.	.|.	.|.	.|.	.|.	.|.	54|56
chr13:43501126-43501164	30|34	30|32	.|.	.|.	38|34	.|.	32|36	.|.	.|.	.|.	.|.	38|34	.|.	.|.	.|.	.|.	.|.	.|.	.|.	28|32	30|34	38|34	.|.	34|36	32|36	32|34	.|.	.|.	.|.	38|34	30|34	38|34	32|36	.|.	30|34	.|.	.|.	.|.	.|.	.|.	.|.	.|.	.|.	38|34	.|.	.|.	36|40	.|.	.|.
chr13:43984761-43984787	.|.	.|.	.|.	.|.	.|.	.|.	.|.	.|.	.|.	.|.	.|.	.|.	.|.	.|.	.|.	26|24	.|.	.|.	.|.	.|.	.|.	.|.	.|.	.|.	.|.	.|.	.|.	.|.	.|.	.|.	.|.	26|24	.|.	26|26	.|.	.|.	.|.	.|.	.|.	.|.	.|.	.|.	.|.	26|26	.|.	.|.	.|.	.|.	.|.
chr13:44255822-44255868	40|42	.|.	.|.	.|.	.|.	.|.	.|.	36|38	.|.	.|.	.|.	.|.	.|.	.|.	.|.	.|.	.|.	.|.	.|.	.|.	.|.	.|.	.|.	.|.	.|.	.|.	.|.	.|.	.|.	.|.	.|.	.|.	.|.	.|.	.|.	.|.	.|.	.|.	.|.	.|.	.|.	.|.	.|.	.|.	.|.	36|38	.|.	.|.	.|.
chr13:44629329-44629363	.|.	.|.	.|.	.|.	.|.	.|.	.|.	.|.	.|.	.|.	.|.	.|.	.|.	.|.	.|.	.|.	.|.	.|.	.|.	.|.	.|.	.|.	.|.	.|.	.|.	.|.	.|.	.|.	.|.	.|.	.|.	.|.	.|.	.|.	.|.	.|.	.|.	.|.	.|.	.|.	.|.	.|.	.|.	.|.	.|.	.|.	.|.	.|.	.|.
chr13:44692730-44692764	.|.	24|26	24|26	24|26	.|.	.|.	.|.	.|.	24|26	24|26	.|.	.|.	.|.	.|.	24|26	24|26	24|26	.|.	.|.	24|26	.|.	.|.	.|.	24|26	.|.	24|26	.|.	24|26	.|.	.|.	.|.	.|.	24|26	.|.	.|.	24|26	24|26	.|.	.|.	.|.	.|.	24|26	.|.	24|26	24|26	.|.	24|26	24|26	.|.
chr13:44694379-44694404	.|.	20|20	.|.	.|.	.|.	.|.	.|.	.|.	.|.	.|.	.|.	.|.	.|.	.|.	.|.	.|.	.|.	.|.	.|.	.|.	.|.	.|.	.|.	.|.	.|.	.|.	20|20	20|20	.|.	.|.	.|.	.|.	20|20	20|20	20|20	20|20	.|.	.|.	.|.	20|20	.|.	.|.	.|.	.|.	.|.	20|20	20|20	.|.	.|.
chr13:44777245-44777291	.|.	.|.	.|.	.|.	.|.	.|.	.|.	.|.	.|.	.|.	.|.	.|.	.|.	.|.	.|.	.|.	.|.	.|.	.|.	.|.	.|.	.|.	.|.	.|.	.|.	.|.	.|.	34|34	.|.	.|.	.|.	.|.	.|.	.|.	.|.	.|.	.|.	.|.	.|.	.|.	.|.	.|.	50|52	.|.	.|.	.|.	.|.	.|.	.|.
chr13:45305281-45305313	.|.	.|.	.|.	.|.	.|.	.|.	.|.	.|.	.|.	.|.	.|.	.|.	.|.	.|.	.|.	.|.	.|.	.|.	.|.	.|.	.|.	.|.	.|.	.|.	.|.	24|26	.|.	.|.	.|.	.|.	.|.	.|.	.|.	.|.	.|.	.|.	.|.	.|.	.|.	.|.	.|.	.|.	.|.	.|.	.|.	.|.	20|20	.|.	.|.
chr13:45340963-45341003	.|.	.|.	.|.	.|.	.|.	.|.	.|.	.|.	.|.	34|32	.|.	.|.	.|.	.|.	.|.	.|.	.|.	.|.	.|.	.|.	.|.	.|.	.|.	.|.	.|.	.|.	.|.	.|.	.|.	.|.	.|.	.|.	.|.	.|.	.|.	.|.	.|.	.|.	.|.	34|32	.|.	.|.	.|.	.|.	.|.	.|.	.|.	34|30	.|.
chr13:46421757-46421783	.|.	.|.	.|.	.|.	.|.	.|.	26|26	.|.	30|30	30|30	.|.	26|26	26|26	.|.	.|.	.|.	.|.	.|.	.|.	26|26	.|.	.|.	.|.	.|.	.|.	.|.	28|28	.|.	26|24	.|.	.|.	28|28	26|26	.|.	.|.	.|.	26|30	.|.	30|30	26|26	.|.	.|.	.|.	26|26	26|26	28|30	28|30	.|.	.|.
chr13:47141627-47141661	.|.	.|.	.|.	.|.	.|.	.|.	.|.	.|.	.|.	.|.	.|.	.|.	.|.	.|.	.|.	.|.	44|46	.|.	.|.	.|.	.|.	44|46	.|.	.|.	.|.	.|.	.|.	.|.	.|.	.|.	.|.	.|.	.|.	.|.	.|.	.|.	.|.	.|.	.|.	.|.	.|.	.|.	.|.	.|.	.|.	.|.	36|36	.|.	.|.
chr13:47174753-47174789	.|.	.|.	.|.	.|.	.|.	.|.	.|.	.|.	.|.	.|.	44|46	.|.	.|.	.|.	.|.	.|.	.|.	.|.	.|.	.|.	.|.	.|.	.|.	44|44	.|.	.|.	.|.	.|.	.|.	.|.	.|.	.|.	.|.	.|.	.|.	.|.	.|.	.|.	.|.	.|.	.|.	.|.	.|.	.|.	.|.	44|46	.|.	.|.	.|.
chr13:47256071-47256101	34|34	.|.	.|.	.|.	.|.	.|.	.|.	.|.	.|.	.|.	.|.	.|.	.|.	.|.	.|.	.|.	.|.	.|.	.|.	.|.	.|.	.|.	.|.	.|.	.|.	.|.	.|.	.|.	38|40	.|.	.|.	.|.	.|.	34|34	.|.	.|.	.|.	.|.	.|.	.|.	.|.	.|.	38|40	.|.	.|.	.|.	.|.	.|.	.|.
chr13:47671099-47671127	.|.	.|.	.|.	.|.	.|.	.|.	.|.	.|.	.|.	.|.	.|.	.|.	.|.	.|.	.|.	.|.	.|.	.|.	.|.	.|.	.|.	.|.	.|.	.|.	.|.	.|.	.|.	.|.	.|.	.|.	.|.	.|.	.|.	.|.	.|.	.|.	.|.	.|.	.|.	.|.	.|.	.|.	.|.	.|.	.|.	.|.	.|.	.|.	.|.
chr13:47767531-47767575	.|.	.|.	.|.	.|.	.|.	.|.	.|.	.|.	.|.	.|.	.|.	.|.	.|.	.|.	.|.	.|.	.|.	.|.	.|.	.|.	.|.	.|.	.|.	.|.	.|.	.|.	.|.	.|.	.|.	.|.	.|.	46|50	.|.	.|.	.|.	.|.	.|.	.|.	.|.	.|.	.|.	.|.	.|.	.|.	.|.	.|.	.|.	.|.	.|.
chr13:47968575-47968611	.|.	.|.	.|.	.|.	.|.	32|34	.|.	.|.	.|.	.|.	.|.	.|.	32|38	.|.	.|.	.|.	.|.	.|.	.|.	36|34	32|34	.|.	.|.	.|.	.|.	.|.	.|.	.|.	.|.	.|.	.|.	.|.	.|.	.|.	.|.	.|.	.|.	.|.	36|34	.|.	30|34	.|.	.|.	36|36	.|.	.|.	.|.	.|.	.|.
chr13:48424331-48424355	.|.	24|24	.|.	.|.	.|.	.|.	.|.	.|.	.|.	.|.	.|.	.|.	.|.	.|.	23|23	.|.	.|.	.|.	.|.	.|.	.|.	.|.	.|.	.|.	.|.	.|.	.|.	.|.	.|.	.|.	.|.	.|.	.|.	.|.	.|.	.|.	24|24	.|.	24|24	.|.	.|.	24|23	.|.	24|24	.|.	.|.	23|23	24|24	.|.
chr13:48519778-48519820	.|.	.|.	30|30	.|.	.|.	.|.	.|.	.|.	.|.	.|.	.|.	.|.	.|.	.|.	.|.	.|.	.|.	.|.	.|.	.|.	30|34	44|48	.|.	.|.	.|.	.|.	.|.	.|.	.|.	.|.	.|.	.|.	.|.	.|.	.|.	.|.	32|32	.|.	32|46	.|.	.|.	.|.	.|.	30|32	.|.	30|32	.|.	.|.	.|.
chr13:48757973-48758019	.|.	.|.	.|.	.|.	.|.	.|.	.|.	.|.	.|.	.|.	.|.	.|.	.|.	.|.	.|.	.|.	.|.	.|.	.|.	.|.	30|32	.|.	.|.	.|.	.|.	.|.	.|.	.|.	.|.	.|.	.|.	.|.	.|.	.|.	.|.	.|.	.|.	.|.	.|.	.|.	.|.	54|60	.|.	.|.	.|.	30|32	.|.	.|.	.|.
chr13:49360079-49360129	.|.	.|.	.|.	.|.	34|38	.|.	.|.	.|.	34|36	.|.	.|.	.|.	.|.	.|.	.|.	.|.	.|.	.|.	.|.	.|.	.|.	.|.	.|.	36|26	.|.	.|.	34|36	.|.	.|.	.|.	40|40	.|.	.|.	.|.	.|.	.|.	.|.	36|40	.|.	.|.	.|.	.|.	.|.	.|.	.|.	.|.	.|.	.|.	.|.
chr13:49375540-49375570	.|.	.|.	.|.	.|.	.|.	.|.	.|.	.|.	.|.	.|.	.|.	.|.	.|.	.|.	.|.	.|.	.|.	.|.	.|.	26|28	.|.	.|.	.|.	.|.	.|.	.|.	.|.	.|.	.|.	.|.	.|.	.|.	.|.	.|.	.|.	.|.	.|.	.|.	.|.	.|.	.|.	.|.	.|.	26|24	26|24	.|.	.|.	.|.	.|.
chr13:49911868-49911910	32|34	32|34	.|.	30|30	.|.	.|.	30|34	34|34	32|34	32|34	.|.	30|32	.|.	30|32	32|34	.|.	.|.	.|.	.|.	30|34	30|30	.|.	.|.	.|.	30|30	.|.	26|30	28|28	.|.	.|.	30|34	.|.	32|34	.|.	32|34	30|34	32|34	32|34	30|30	.|.	.|.	30|30	32|34	28|30	28|34	30|32	.|.	.|.	.|.
chr13:50967158-50967188	.|.	.|.	.|.	.|.	.|.	.|.	30|30	.|.	.|.	30|30	.|.	30|30	.|.	30|30	.|.	30|30	.|.	30|30	.|.	30|25	.|.	.|.	30|30	.|.	.|.	30|30	.|.	30|30	30|30	.|.	30|30	.|.	30|30	.|.	.|.	.|.	.|.	.|.	30|30	.|.	.|.	30|30	.|.	.|.	.|.	.|.	30|30	30|30	.|.
chr13:50997926-50997951	.|.	.|.	.|.	.|.	.|.	.|.	.|.	.|.	.|.	.|.	.|.	.|.	.|.	.|.	.|.	.|.	.|.	.|.	.|.	.|.	.|.	.|.	25|25	.|.	.|.	.|.	.|.	.|.	25|25	.|.	.|.	.|.	.|.	.|.	.|.	.|.	.|.	.|.	.|.	.|.	.|.	.|.	.|.	.|.	.|.	.|.	.|.	.|.	.|.
chr13:51297551-51297581	.|.	.|.	.|.	.|.	.|.	.|.	.|.	.|.	.|.	.|.	.|.	.|.	.|.	.|.	.|.	.|.	.|.	.|.	.|.	.|.	.|.	.|.	.|.	.|.	.|.	.|.	.|.	.|.	.|.	.|.	.|.	.|.	.|.	.|.	.|.	.|.	.|.	26|28	.|.	.|.	.|.	.|.	.|.	.|.	.|.	.|.	.|.	.|.	.|.
chr13:51506091-51506119	.|.	.|.	.|.	.|.	.|.	.|.	34|34	.|.	.|.	.|.	.|.	32|34	.|.	.|.	.|.	.|.	.|.	.|.	.|.	.|.	.|.	34|36	.|.	.|.	.|.	.|.	.|.	.|.	.|.	.|.	.|.	.|.	.|.	.|.	.|.	.|.	.|.	34|34	.|.	.|.	.|.	.|.	.|.	.|.	.|.	.|.	.|.	.|.	.|.
chr13:51715231-51715275	.|.	.|.	.|.	36|36	.|.	.|.	.|.	.|.	.|.	.|.	.|.	38|40	.|.	.|.	.|.	.|.	.|.	.|.	.|.	36|36	.|.	.|.	.|.	.|.	.|.	.|.	.|.	.|.	.|.	.|.	.|.	.|.	44|38	.|.	.|.	.|.	.|.	.|.	.|.	.|.	.|.	.|.	44|40	.|.	34|36	.|.	.|.	34|36	.|.
chr13:51949870-51949902	.|.	.|.	.|.	.|.	.|.	.|.	.|.	.|.	.|.	.|.	26|28	.|.	.|.	.|.	.|.	.|.	.|.	.|.	26|26	26|26	.|.	.|.	.|.	26|26	26|26	26|26	.|.	.|.	.|.	.|.	26|26	.|.	.|.	.|.	.|.	.|.	.|.	.|.	.|.	.|.	.|.	.|.	.|.	26|26	.|.	.|.	.|.	.|.	.|.
chr13:52292695-52292739	.|.	.|.	.|.	.|.	.|.	.|.	.|.	.|.	.|.	.|.	.|.	.|.	.|.	.|.	.|.	.|.	.|.	.|.	.|.	.|.	.|.	44|42	.|.	.|.	44|44	.|.	.|.	.|.	.|.	.|.	.|.	.|.	.|.	.|.	.|.	.|.	.|.	.|.	.|.	.|.	.|.	.|.	.|.	.|.	.|.	58|62	.|.	.|.	.|.
chr13:53332980-53333014	.|.	44|46	34|34	.|.	.|.	.|.	.|.	44|46	34|34	.|.	.|.	.|.	44|46	.|.	.|.	.|.	.|.	.|.	.|.	34|48	.|.	.|.	46|48	34|36	.|.	44|48	34|32	.|.	46|48	.|.	46|48	.|.	34|34	.|.	.|.	32|32	.|.	.|.	.|.	44|46	44|46	.|.	.|.	.|.	42|46	.|.	34|34	.|.	.|.
chr13:53397077-53397102	.|.	.|.	.|.	.|.	.|.	.|.	.|.	.|.	.|.	.|.	.|.	.|.	.|.	.|.	.|.	.|.	.|.	.|.	.|.	.|.	.|.	.|.	.|.	.|.	.|.	.|.	.|.	.|.	25|25	.|.	.|.	.|.	25|25	.|.	.|.	.|.	.|.	.|.	.|.	.|.	.|.	.|.	.|.	.|.	.|.	.|.	.|.	.|.	.|.
chr13:53985275-53985319	.|.	.|.	.|.	.|.	.|.	.|.	.|.	40|42	40|42	.|.	.|.	.|.	.|.	.|.	.|.	.|.	.|.	.|.	.|.	38|42	36|34	.|.	.|.	.|.	40|42	40|42	.|.	.|.	.|.	.|.	40|42	.|.	.|.	.|.	.|.	44|42	38|40	.|.	.|.	.|.	.|.	38|40	.|.	.|.	36|40	.|.	40|38	.|.	.|.
chr13:54526359-54526391	30|30	.|.	.|.	.|.	.|.	.|.	.|.	.|.	.|.	.|.	.|.	.|.	.|.	.|.	.|.	.|.	.|.	.|.	.|.	.|.	.|.	.|.	.|.	.|.	.|.	28|30	.|.	.|.	.|.	.|.	.|.	.|.	.|.	.|.	.|.	.|.	.|.	.|.	.|.	.|.	.|.	.|.	.|.	.|.	.|.	.|.	.|.	.|.	.|.
chr13:54604817-54604845	.|.	.|.	.|.	.|.	.|.	.|.	.|.	.|.	.|.	.|.	.|.	.|.	.|.	.|.	.|.	.|.	.|.	.|.	.|.	.|.	.|.	.|.	.|.	.|.	.|.	.|.	.|.	.|.	.|.	28|28	.|.	.|.	.|.	.|.	.|.	.|.	.|.	.|.	.|.	.|.	.|.	.|.	.|.	.|.	.|.	.|.	28|28	.|.	.|.
chr13:55230651-55230684	.|.	.|.	.|.	.|.	.|.	.|.	.|.	.|.	.|.	.|.	.|.	.|.	.|.	.|.	.|.	.|.	.|.	.|.	.|.	.|.	.|.	.|.	.|.	.|.	.|.	.|.	.|.	.|.	.|.	.|.	33|33	.|.	.|.	.|.	.|.	33|33	.|.	.|.	.|.	.|.	.|.	.|.	.|.	.|.	30|30	.|.	33|33	.|.	.|.
chr13:55788006-55788054	.|.	38|40	.|.	.|.	.|.	.|.	.|.	.|.	.|.	.|.	.|.	.|.	.|.	.|.	.|.	.|.	.|.	.|.	.|.	.|.	.|.	.|.	.|.	.|.	.|.	.|.	.|.	.|.	.|.	.|.	.|.	.|.	.|.	38|40	.|.	.|.	.|.	.|.	.|.	40|42	.|.	.|.	.|.	.|.	.|.	.|.	38|40	.|.	.|.
chr13:55821130-55821162	.|.	.|.	.|.	.|.	38|42	.|.	.|.	.|.	.|.	36|36	.|.	32|36	.|.	.|.	.|.	.|.	.|.	.|.	.|.	.|.	.|.	.|.	.|.	.|.	.|.	.|.	.|.	36|36	.|.	.|.	.|.	.|.	.|.	38|38	.|.	.|.	.|.	.|.	.|.	.|.	.|.	.|.	.|.	.|.	.|.	.|.	.|.	.|.	.|.
chr13:55878172-55878206	.|.	.|.	.|.	.|.	.|.	.|.	48|50	.|.	44|46	.|.	.|.	40|42	.|.	.|.	.|.	.|.	.|.	.|.	.|.	50|50	.|.	.|.	.|.	.|.	.|.	.|.	.|.	.|.	.|.	.|.	38|40	.|.	.|.	.|.	.|.	.|.	.|.	.|.	.|.	.|.	.|.	.|.	.|.	.|.	.|.	48|50	.|.	.|.	.|.
chr13:56487901-56487945	32|32	.|.	.|.	.|.	.|.	.|.	.|.	.|.	.|.	.|.	.|.	.|.	.|.	.|.	.|.	.|.	.|.	.|.	.|.	34|34	.|.	.|.	.|.	32|34	.|.	.|.	.|.	.|.	.|.	.|.	.|.	.|.	.|.	.|.	.|.	.|.	.|.	.|.	.|.	.|.	.|.	.|.	.|.	.|.	.|.	.|.	.|.	.|.	.|.
chr13:56502627-56502661	.|.	.|.	.|.	.|.	.|.	.|.	.|.	.|.	.|.	.|.	.|.	.|.	.|.	.|.	.|.	.|.	.|.	.|.	.|.	.|.	.|.	.|.	.|.	.|.	.|.	.|.	.|.	.|.	.|.	.|.	.|.	36|40	.|.	.|.	.|.	.|.	.|.	.|.	.|.	.|.	.|.	.|.	.|.	.|.	.|.	.|.	.|.	.|.	.|.
chr13:56601410-56601438	.|.	.|.	.|.	.|.	.|.	32|34	.|.	.|.	.|.	.|.	.|.	.|.	.|.	28|26	.|.	.|.	.|.	.|.	.|.	.|.	.|.	.|.	.|.	.|.	.|.	.|.	.|.	.|.	.|.	.|.	.|.	.|.	.|.	.|.	.|.	.|.	.|.	.|.	.|.	.|.	.|.	.|.	.|.	.|.	.|.	.|.	.|.	.|.	.|.
chr13:56647334-56647372	.|.	.|.	.|.	.|.	.|.	.|.	.|.	.|.	.|.	.|.	.|.	.|.	.|.	.|.	.|.	.|.	.|.	.|.	.|.	.|.	38|40	.|.	.|.	.|.	.|.	.|.	.|.	38|40	38|40	.|.	.|.	.|.	.|.	.|.	.|.	.|.	.|.	.|.	38|40	.|.	.|.	.|.	.|.	38|40	38|40	.|.	.|.	.|.	.|.
chr13:56789972-56790008	.|.	.|.	.|.	.|.	.|.	.|.	.|.	28|30	.|.	30|30	.|.	.|.	38|38	.|.	.|.	.|.	.|.	.|.	.|.	.|.	.|.	.|.	.|.	.|.	.|.	32|38	.|.	.|.	.|.	.|.	.|.	.|.	.|.	.|.	.|.	.|.	.|.	.|.	.|.	.|.	.|.	.|.	.|.	.|.	28|30	38|38	.|.	36|38	.|.
chr13:57195291-57195317	.|.	.|.	.|.	.|.	26|28	.|.	.|.	.|.	.|.	.|.	.|.	.|.	.|.	.|.	.|.	.|.	.|.	.|.	.|.	.|.	.|.	.|.	.|.	.|.	.|.	.|.	.|.	.|.	.|.	.|.	.|.	.|.	.|.	.|.	.|.	.|.	.|.	.|.	.|.	.|.	.|.	.|.	.|.	.|.	.|.	.|.	.|.	.|.	.|.
chr13:57357756-57357786	26|28	.|.	.|.	.|.	.|.	.|.	.|.	26|26	32|34	.|.	.|.	.|.	.|.	.|.	.|.	.|.	.|.	.|.	.|.	26|32	.|.	.|.	32|32	.|.	.|.	.|.	.|.	.|.	.|.	.|.	.|.	.|.	26|26	26|26	.|.	32|32	32|32	.|.	.|.	32|32	26|26	.|.	.|.	.|.	.|.	32|32	.|.	28|32	.|.
chr13:57659842-57659890	.|.	.|.	.|.	.|.	.|.	.|.	.|.	.|.	.|.	.|.	.|.	.|.	.|.	.|.	.|.	.|.	.|.	.|.	.|.	.|.	.|.	.|.	.|.	.|.	.|.	.|.	.|.	.|.	.|.	.|.	.|.	.|.	.|.	.|.	.|.	.|.	44|46	.|.	.|.	.|.	.|.	.|.	.|.	.|.	.|.	.|.	.|.	.|.	.|.
chr13:57979053-57979083	.|.	.|.	.|.	.|.	.|.	.|.	.|.	.|.	.|.	.|.	.|.	.|.	.|.	.|.	.|.	.|.	.|.	.|.	.|.	.|.	.|.	.|.	.|.	.|.	.|.	.|.	.|.	.|.	.|.	.|.	.|.	.|.	.|.	.|.	.|.	.|.	.|.	.|.	.|.	.|.	.|.	.|.	.|.	.|.	.|.	.|.	.|.	.|.	.|.
chr13:58203242-58203276	30|30	.|.	.|.	.|.	.|.	.|.	.|.	.|.	30|30	.|.	24|24	.|.	24|24	.|.	.|.	30|30	.|.	.|.	.|.	.|.	.|.	.|.	.|.	24|24	.|.	.|.	.|.	.|.	30|30	.|.	.|.	.|.	24|24	.|.	.|.	24|24	26|30	.|.	.|.	.|.	.|.	.|.	.|.	.|.	.|.	24|24	.|.	.|.	.|.
chr13:58334858-58334888	.|.	.|.	.|.	.|.	.|.	.|.	.|.	.|.	.|.	.|.	.|.	.|.	.|.	.|.	.|.	.|.	.|.	.|.	.|.	.|.	.|.	.|.	.|.	.|.	.|.	.|.	.|.	.|.	.|.	.|.	.|.	.|.	.|.	.|.	.|.	.|.	.|.	.|.	.|.	.|.	.|.	.|.	.|.	.|.	.|.	.|.	.|.	.|.	.|.
chr13:58548779-58548813	.|.	.|.	.|.	.|.	.|.	.|.	48|50	.|.	.|.	.|.	.|.	.|.	.|.	.|.	.|.	.|.	.|.	.|.	.|.	48|52	.|.	.|.	42|56	.|.	.|.	.|.	.|.	.|.	40|44	.|.	.|.	40|42	46|50	.|.	.|.	.|.	.|.	.|.	.|.	48|52	.|.	.|.	.|.	.|.	.|.	.|.	.|.	46|50	.|.
chr13:58665399-58665447	.|.	.|.	.|.	.|.	.|.	.|.	.|.	.|.	.|.	.|.	.|.	.|.	.|.	.|.	.|.	.|.	.|.	.|.	.|.	.|.	.|.	.|.	.|.	.|.	.|.	.|.	.|.	.|.	.|.	.|.	.|.	.|.	.|.	.|.	38|36	.|.	.|.	.|.	.|.	.|.	.|.	.|.	.|.	.|.	.|.	.|.	.|.	.|.	.|.
chr13:58775757-58775793	36|32	36|32	.|.	.|.	.|.	.|.	36|34	.|.	32|32	.|.	36|32	36|32	.|.	36|34	32|34	.|.	.|.	32|32	.|.	36|32	36|36	32|34	36|32	.|.	36|32	36|34	36|36	36|36	36|32	.|.	32|32	36|36	.|.	32|32	36|34	36|32	36|32	34|34	36|32	36|32	36|32	36|32	36|32	36|32	36|34	36|34	32|34	32|34	32|34
chr13:58902417-58902465	40|42	36|38	.|.	40|42	44|46	.|.	38|42	38|42	42|44	42|44	.|.	40|44	40|42	42|44	38|42	40|44	.|.	.|.	.|.	40|42	.|.	38|40	40|42	38|40	40|42	40|42	40|42	.|.	40|42	.|.	38|42	.|.	38|42	40|42	38|42	38|42	38|42	.|.	38|44	40|42	40|42	38|42	40|42	40|42	40|42	40|42	.|.	42|34	38|42
chr13:59053277-59053303	.|.	.|.	26|26	.|.	26|26	26|26	.|.	.|.	26|26	.|.	.|.	26|26	26|26	26|26	.|.	26|26	.|.	26|26	.|.	26|24	.|.	26|26	26|26	26|26	26|26	.|.	26|26	26|26	26|26	.|.	26|26	.|.	26|24	.|.	.|.	26|26	26|26	26|26	26|26	.|.	26|28	26|26	.|.	26|26	26|26	26|26	26|26	26|26	26|26
chr13:59195443-59195487	.|.	.|.	.|.	.|.	.|.	.|.	.|.	.|.	.|.	.|.	.|.	44|54	.|.	.|.	.|.	.|.	.|.	.|.	.|.	.|.	.|.	.|.	44|54	.|.	.|.	.|.	.|.	.|.	.|.	.|.	.|.	.|.	.|.	28|30	.|.	.|.	.|.	.|.	.|.	.|.	.|.	.|.	.|.	52|52	.|.	.|.	.|.	.|.	.|.
chr13:59226560-59226588	.|.	.|.	.|.	.|.	.|.	.|.	.|.	.|.	.|.	.|.	.|.	.|.	.|.	.|.	22|22	.|.	.|.	28|30	.|.	.|.	.|.	.|.	.|.	.|.	.|.	.|.	.|.	.|.	.|.	.|.	.|.	.|.	.|.	.|.	22|24	.|.	.|.	.|.	.|.	.|.	.|.	.|.	.|.	.|.	.|.	.|.	.|.	.|.	.|.
chr13:60133447-60133483	.|.	.|.	.|.	.|.	.|.	.|.	.|.	.|.	.|.	.|.	.|.	.|.	.|.	.|.	.|.	.|.	.|.	.|.	.|.	24|26	26|26	.|.	.|.	.|.	.|.	.|.	.|.	.|.	.|.	.|.	.|.	.|.	.|.	.|.	.|.	.|.	.|.	.|.	.|.	.|.	.|.	.|.	.|.	.|.	.|.	.|.	.|.	.|.	.|.
chr13:60522974-60523038	56|60	.|.	.|.	.|.	.|.	.|.	.|.	.|.	.|.	.|.	.|.	.|.	.|.	.|.	.|.	.|.	.|.	52|52	.|.	.|.	.|.	.|.	.|.	.|.	.|.	.|.	.|.	.|.	.|.	.|.	.|.	.|.	.|.	.|.	.|.	52|52	.|.	.|.	.|.	.|.	.|.	.|.	.|.	.|.	.|.	.|.	.|.	.|.	.|.
chr13:60674041-60674105	.|.	.|.	.|.	.|.	.|.	.|.	.|.	.|.	.|.	.|.	.|.	.|.	.|.	.|.	.|.	.|.	.|.	.|.	.|.	.|.	.|.	.|.	.|.	.|.	.|.	.|.	72|72	72|72	.|.	.|.	.|.	.|.	.|.	64|72	.|.	.|.	.|.	.|.	.|.	.|.	.|.	68|72	.|.	.|.	.|.	.|.	.|.	.|.	.|.
chr13:60678700-60678728	.|.	.|.	.|.	.|.	.|.	.|.	.|.	.|.	.|.	.|.	.|.	.|.	.|.	.|.	.|.	.|.	.|.	.|.	.|.	.|.	.|.	.|.	.|.	.|.	.|.	.|.	.|.	.|.	.|.	.|.	.|.	.|.	.|.	.|.	.|.	.|.	.|.	.|.	.|.	.|.	.|.	.|.	24|26	.|.	.|.	.|.	.|.	26|24	.|.
chr13:60792413-60792455	.|.	.|.	.|.	.|.	.|.	.|.	.|.	.|.	.|.	.|.	.|.	.|.	.|.	.|.	.|.	.|.	.|.	.|.	.|.	.|.	.|.	.|.	.|.	.|.	.|.	.|.	.|.	.|.	.|.	.|.	.|.	.|.	.|.	.|.	.|.	34|36	.|.	.|.	.|.	.|.	.|.	.|.	.|.	.|.	.|.	.|.	.|.	.|.	.|.
chr13:61141478-61141503	.|.	.|.	25|25	.|.	.|.	25|25	.|.	.|.	.|.	.|.	.|.	.|.	.|.	.|.	25|25	25|25	.|.	.|.	.|.	.|.	25|25	.|.	.|.	.|.	.|.	.|.	.|.	.|.	.|.	.|.	.|.	.|.	.|.	.|.	25|25	.|.	.|.	.|.	.|.	.|.	.|.	.|.	.|.	.|.	.|.	.|.	25|25	.|.	.|.
chr13:61210178-61210210	.|.	.|.	.|.	.|.	.|.	.|.	.|.	.|.	.|.	.|.	.|.	.|.	.|.	.|.	.|.	.|.	.|.	.|.	.|.	.|.	.|.	.|.	.|.	.|.	.|.	.|.	.|.	.|.	.|.	.|.	.|.	.|.	.|.	.|.	.|.	.|.	.|.	.|.	.|.	.|.	.|.	.|.	.|.	.|.	.|.	.|.	22|24	.|.	.|.
chr13:62360944-62360974	.|.	.|.	.|.	.|.	.|.	.|.	.|.	.|.	.|.	.|.	.|.	30|34	.|.	.|.	.|.	.|.	.|.	.|.	.|.	.|.	30|38	.|.	.|.	36|36	.|.	.|.	.|.	.|.	.|.	.|.	30|28	.|.	.|.	.|.	30|30	.|.	.|.	.|.	.|.	.|.	.|.	.|.	.|.	.|.	.|.	.|.	.|.	30|30	.|.
chr13:62805959-62805991	.|.	.|.	.|.	.|.	.|.	.|.	.|.	.|.	28|28	.|.	.|.	.|.	.|.	.|.	36|38	.|.	.|.	.|.	.|.	28|28	.|.	.|.	.|.	.|.	.|.	.|.	36|36	34|34	28|28	.|.	.|.	.|.	.|.	38|38	.|.	28|28	30|38	.|.	.|.	.|.	28|28	.|.	.|.	38|38	.|.	.|.	.|.	36|38	38|38
chr13:62864853-62864889	.|.	.|.	.|.	.|.	.|.	.|.	.|.	.|.	.|.	.|.	.|.	.|.	.|.	.|.	.|.	.|.	.|.	.|.	.|.	.|.	.|.	.|.	.|.	.|.	.|.	.|.	.|.	.|.	.|.	.|.	.|.	.|.	.|.	.|.	.|.	44|44	.|.	.|.	.|.	.|.	.|.	.|.	.|.	.|.	.|.	.|.	.|.	.|.	.|.
chr13:62919728-62919766	.|.	30|32	.|.	.|.	.|.	.|.	.|.	.|.	.|.	.|.	.|.	.|.	.|.	.|.	.|.	.|.	.|.	.|.	.|.	.|.	34|36	.|.	.|.	.|.	.|.	.|.	30|32	.|.	.|.	36|36	.|.	.|.	.|.	.|.	.|.	34|36	.|.	.|.	.|.	.|.	.|.	.|.	.|.	.|.	.|.	.|.	.|.	.|.	.|.
chr13:62970454-62970486	.|.	.|.	.|.	.|.	.|.	.|.	.|.	.|.	.|.	.|.	.|.	.|.	.|.	.|.	.|.	.|.	22|22	.|.	.|.	.|.	.|.	.|.	.|.	.|.	.|.	.|.	.|.	.|.	.|.	36|38	.|.	.|.	.|.	.|.	.|.	.|.	.|.	.|.	.|.	.|.	.|.	.|.	.|.	.|.	.|.	.|.	.|.	.|.	.|.
chr13:63146472-63146504	.|.	.|.	.|.	.|.	28|30	.|.	.|.	.|.	.|.	.|.	.|.	.|.	.|.	.|.	.|.	.|.	.|.	.|.	34|38	.|.	.|.	.|.	34|38	30|30	.|.	.|.	.|.	.|.	.|.	.|.	.|.	.|.	.|.	.|.	.|.	34|36	.|.	.|.	.|.	.|.	.|.	.|.	.|.	34|36	.|.	.|.	.|.	.|.	.|.
chr13:63279442-63279472	.|.	30|28	.|.	.|.	.|.	30|28	.|.	.|.	.|.	.|.	.|.	.|.	.|.	.|.	.|.	30|28	.|.	.|.	.|.	.|.	.|.	.|.	.|.	.|.	30|28	.|.	.|.	.|.	.|.	.|.	.|.	.|.	.|.	.|.	.|.	28|28	.|.	.|.	.|.	.|.	.|.	.|.	.|.	.|.	.|.	28|28	.|.	.|.	.|.
chr13:63326813-63326838	.|.	.|.	.|.	.|.	.|.	.|.	.|.	.|.	.|.	.|.	.|.	.|.	.|.	.|.	.|.	.|.	.|.	.|.	.|.	.|.	.|.	25|25	.|.	.|.	.|.	.|.	.|.	.|.	.|.	.|.	.|.	.|.	.|.	.|.	.|.	.|.	.|.	.|.	.|.	.|.	.|.	.|.	.|.	.|.	25|25	.|.	.|.	.|.	.|.
chr13:63715738-63715762	.|.	.|.	.|.	.|.	.|.	.|.	.|.	.|.	.|.	.|.	.|.	.|.	.|.	.|.	.|.	.|.	.|.	.|.	.|.	.|.	.|.	.|.	30|30	.|.	.|.	.|.	.|.	.|.	.|.	.|.	.|.	.|.	.|.	.|.	.|.	.|.	.|.	.|.	.|.	.|.	.|.	.|.	.|.	.|.	.|.	.|.	.|.	.|.	.|.
chr13:63747756-63747788	.|.	.|.	.|.	.|.	.|.	.|.	.|.	.|.	.|.	.|.	.|.	.|.	.|.	.|.	.|.	.|.	.|.	.|.	.|.	.|.	.|.	.|.	.|.	.|.	.|.	.|.	.|.	.|.	.|.	.|.	.|.	.|.	.|.	.|.	.|.	.|.	.|.	.|.	.|.	.|.	.|.	.|.	.|.	.|.	.|.	.|.	.|.	.|.	.|.
chr13:63823338-63823370	.|.	.|.	.|.	40|40	.|.	38|40	.|.	36|40	.|.	34|34	32|34	.|.	.|.	.|.	.|.	32|32	.|.	.|.	.|.	.|.	40|40	36|40	.|.	.|.	.|.	.|.	32|32	.|.	40|40	.|.	34|40	32|32	38|40	.|.	.|.	.|.	34|40	32|32	.|.	32|32	32|34	32|40	.|.	.|.	.|.	.|.	36|38	.|.	32|30
chr13:64559692-64559724	.|.	.|.	.|.	.|.	.|.	.|.	.|.	.|.	.|.	.|.	.|.	.|.	.|.	.|.	.|.	26|28	.|.	.|.	.|.	.|.	.|.	.|.	.|.	.|.	.|.	.|.	.|.	.|.	.|.	.|.	.|.	32|34	.|.	.|.	.|.	34|34	.|.	.|.	.|.	.|.	.|.	.|.	.|.	.|.	.|.	.|.	.|.	32|34	.|.
chr13:65107337-65107361	.|.	.|.	.|.	.|.	.|.	.|.	.|.	.|.	.|.	.|.	.|.	.|.	.|.	.|.	.|.	.|.	24|26	.|.	.|.	.|.	.|.	.|.	.|.	.|.	.|.	.|.	.|.	.|.	.|.	.|.	.|.	.|.	.|.	.|.	.|.	.|.	.|.	.|.	.|.	.|.	.|.	24|24	.|.	.|.	.|.	.|.	.|.	.|.	.|.
chr13:65155139-65155169	.|.	.|.	.|.	.|.	.|.	24|24	.|.	.|.	.|.	.|.	.|.	.|.	.|.	.|.	.|.	.|.	.|.	.|.	.|.	.|.	.|.	.|.	.|.	.|.	.|.	.|.	.|.	.|.	.|.	.|.	.|.	.|.	.|.	.|.	.|.	.|.	26|26	.|.	.|.	.|.	.|.	.|.	.|.	.|.	.|.	.|.	.|.	.|.	.|.
chr13:65379553-65379583	.|.	.|.	.|.	.|.	.|.	.|.	.|.	.|.	.|.	.|.	.|.	.|.	.|.	.|.	.|.	.|.	.|.	.|.	.|.	.|.	.|.	.|.	.|.	.|.	.|.	30|26	30|30	30|32	.|.	.|.	.|.	.|.	.|.	.|.	.|.	30|30	.|.	.|.	.|.	.|.	.|.	28|28	.|.	30|30	.|.	.|.	.|.	.|.	.|.
chr13:66108901-66108933	24|24	.|.	.|.	.|.	.|.	.|.	.|.	.|.	.|.	.|.	.|.	.|.	.|.	.|.	.|.	.|.	.|.	.|.	.|.	.|.	.|.	.|.	.|.	.|.	.|.	.|.	.|.	.|.	.|.	24|26	.|.	.|.	.|.	.|.	.|.	.|.	.|.	.|.	.|.	.|.	.|.	.|.	28|28	.|.	.|.	.|.	.|.	.|.	.|.
chr13:66220000-66220028	.|.	.|.	.|.	.|.	.|.	.|.	.|.	28|28	.|.	.|.	.|.	.|.	.|.	.|.	.|.	.|.	.|.	28|28	.|.	.|.	.|.	.|.	.|.	.|.	.|.	.|.	.|.	.|.	.|.	.|.	.|.	.|.	.|.	.|.	.|.	.|.	.|.	.|.	.|.	.|.	.|.	.|.	.|.	.|.	.|.	.|.	.|.	.|.	.|.
chr13:66423899-66423935	.|.	.|.	.|.	36|34	.|.	.|.	.|.	.|.	.|.	.|.	.|.	32|34	.|.	.|.	.|.	.|.	.|.	.|.	.|.	36|34	36|34	.|.	36|34	.|.	.|.	36|34	.|.	.|.	.|.	.|.	.|.	.|.	.|.	.|.	.|.	.|.	.|.	.|.	.|.	.|.	.|.	.|.	.|.	36|32	.|.	.|.	.|.	.|.	36|34
chr13:66491295-66491319	24|24	24|24	24|24	.|.	24|24	24|24	.|.	24|24	24|24	24|24	.|.	24|24	.|.	24|24	24|24	24|24	.|.	24|24	24|24	24|24	.|.	24|24	.|.	24|24	24|24	24|24	24|24	24|24	.|.	.|.	24|24	.|.	24|24	24|24	24|24	24|24	24|24	24|24	24|24	24|24	24|24	24|24	24|24	.|.	24|24	24|24	24|24	24|24	24|24
chr13:66841394-66841430	.|.	.|.	.|.	28|28	.|.	28|28	.|.	.|.	.|.	26|28	.|.	32|34	.|.	30|30	.|.	32|34	32|34	.|.	.|.	.|.	.|.	28|28	.|.	.|.	.|.	.|.	.|.	32|34	32|34	.|.	32|34	.|.	28|28	32|34	28|28	28|34	28|28	.|.	.|.	32|34	32|34	28|34	36|34	.|.	.|.	.|.	28|28	32|34	28|28
chr13:67201083-67201119	.|.	28|38	.|.	.|.	.|.	.|.	.|.	28|30	.|.	36|38	.|.	28|30	36|40	.|.	26|28	.|.	.|.	28|30	.|.	28|38	.|.	36|38	.|.	28|30	.|.	.|.	30|38	38|38	.|.	.|.	.|.	.|.	28|30	.|.	.|.	.|.	.|.	.|.	36|40	.|.	.|.	.|.	.|.	28|28	36|38	28|38	.|.	30|40	.|.
chr13:67425707-67425739	.|.	.|.	.|.	.|.	28|28	.|.	.|.	.|.	.|.	.|.	.|.	.|.	28|28	.|.	.|.	.|.	.|.	.|.	.|.	28|30	.|.	28|28	.|.	28|28	.|.	.|.	.|.	.|.	.|.	28|28	28|28	.|.	.|.	.|.	.|.	.|.	28|28	.|.	28|28	.|.	.|.	28|28	.|.	28|28	28|28	28|28	.|.	.|.	.|.
chr13:67461166-67461210	.|.	.|.	.|.	.|.	.|.	.|.	.|.	.|.	.|.	.|.	.|.	.|.	.|.	.|.	.|.	.|.	.|.	.|.	.|.	.|.	30|40	.|.	30|30	.|.	.|.	.|.	.|.	.|.	.|.	.|.	.|.	.|.	.|.	.|.	.|.	.|.	.|.	.|.	.|.	.|.	.|.	.|.	.|.	.|.	.|.	.|.	.|.	.|.	.|.
chr13:67554210-67554262	.|.	.|.	.|.	.|.	.|.	.|.	.|.	.|.	.|.	.|.	.|.	.|.	.|.	.|.	.|.	.|.	.|.	.|.	64|64	.|.	.|.	.|.	.|.	.|.	.|.	.|.	.|.	56|56	.|.	.|.	.|.	.|.	.|.	.|.	.|.	.|.	.|.	.|.	.|.	.|.	.|.	.|.	.|.	.|.	.|.	.|.	.|.	.|.	.|.
chr13:67587396-67587428	.|.	.|.	.|.	.|.	.|.	.|.	.|.	.|.	.|.	24|28	.|.	.|.	.|.	.|.	.|.	.|.	.|.	.|.	.|.	.|.	.|.	.|.	.|.	.|.	.|.	.|.	.|.	.|.	.|.	.|.	.|.	.|.	.|.	.|.	.|.	.|.	.|.	.|.	.|.	.|.	.|.	.|.	.|.	.|.	.|.	.|.	.|.	.|.	.|.
chr13:68234487-68234514	.|.	.|.	.|.	.|.	.|.	.|.	.|.	.|.	.|.	.|.	.|.	.|.	.|.	.|.	.|.	.|.	.|.	27|27	.|.	.|.	.|.	.|.	.|.	27|27	.|.	.|.	.|.	27|27	.|.	.|.	27|27	.|.	.|.	.|.	.|.	.|.	.|.	.|.	27|27	27|27	.|.	.|.	.|.	.|.	.|.	.|.	.|.	.|.	.|.
chr13:68433850-68433874	.|.	.|.	.|.	.|.	.|.	24|22	.|.	.|.	.|.	.|.	.|.	.|.	24|22	.|.	.|.	.|.	.|.	.|.	.|.	24|22	.|.	.|.	.|.	.|.	.|.	.|.	.|.	24|22	.|.	.|.	.|.	24|22	.|.	.|.	.|.	24|22	.|.	.|.	.|.	.|.	.|.	.|.	.|.	.|.	.|.	.|.	.|.	.|.	.|.
chr13:68540420-68540446	.|.	.|.	.|.	.|.	.|.	.|.	.|.	.|.	.|.	.|.	.|.	.|.	.|.	.|.	.|.	.|.	.|.	.|.	.|.	.|.	.|.	.|.	.|.	.|.	.|.	.|.	.|.	.|.	.|.	.|.	.|.	.|.	.|.	.|.	.|.	.|.	.|.	.|.	.|.	.|.	.|.	.|.	.|.	.|.	.|.	.|.	.|.	.|.	.|.
chr13:69499723-69499753	.|.	.|.	.|.	.|.	.|.	.|.	.|.	.|.	.|.	.|.	.|.	.|.	.|.	.|.	.|.	.|.	.|.	.|.	.|.	.|.	.|.	.|.	.|.	28|30	.|.	.|.	.|.	.|.	30|30	.|.	30|30	.|.	.|.	22|24	.|.	.|.	.|.	.|.	.|.	.|.	.|.	.|.	.|.	.|.	.|.	.|.	24|24	.|.	.|.
chr13:69989651-69989675	.|.	.|.	.|.	.|.	.|.	.|.	.|.	.|.	.|.	.|.	24|24	.|.	.|.	.|.	.|.	.|.	.|.	.|.	.|.	.|.	.|.	.|.	.|.	24|24	.|.	.|.	.|.	.|.	.|.	24|24	.|.	.|.	.|.	.|.	.|.	.|.	.|.	.|.	24|24	.|.	.|.	.|.	.|.	.|.	.|.	.|.	.|.	.|.	.|.
chr13:70142648-70142684	.|.	.|.	.|.	.|.	.|.	.|.	.|.	.|.	.|.	.|.	.|.	32|32	.|.	.|.	.|.	.|.	.|.	32|34	.|.	.|.	.|.	.|.	.|.	.|.	.|.	.|.	.|.	.|.	.|.	.|.	.|.	.|.	.|.	.|.	.|.	.|.	.|.	.|.	.|.	.|.	.|.	.|.	.|.	.|.	.|.	.|.	.|.	32|34	.|.
chr13:70600835-70600875	.|.	.|.	.|.	.|.	.|.	.|.	.|.	.|.	.|.	.|.	.|.	.|.	.|.	.|.	.|.	.|.	.|.	.|.	.|.	.|.	.|.	.|.	.|.	.|.	.|.	.|.	.|.	.|.	.|.	.|.	.|.	.|.	.|.	.|.	.|.	.|.	.|.	.|.	.|.	.|.	.|.	.|.	.|.	.|.	.|.	.|.	.|.	.|.	.|.
chr13:70623960-70623985	.|.	.|.	.|.	.|.	25|25	.|.	.|.	.|.	.|.	.|.	.|.	.|.	.|.	.|.	.|.	.|.	.|.	.|.	.|.	25|25	.|.	.|.	.|.	25|25	.|.	.|.	25|25	.|.	25|25	.|.	.|.	25|25	25|25	.|.	.|.	25|25	.|.	.|.	.|.	.|.	25|25	25|25	.|.	.|.	.|.	.|.	25|25	25|25	.|.
chr13:70656443-70656501	.|.	.|.	.|.	.|.	.|.	.|.	.|.	42|44	.|.	.|.	.|.	.|.	.|.	.|.	.|.	.|.	.|.	40|40	40|42	.|.	.|.	40|42	.|.	.|.	.|.	.|.	40|40	.|.	.|.	.|.	.|.	.|.	.|.	.|.	.|.	42|42	.|.	.|.	.|.	.|.	.|.	.|.	.|.	.|.	.|.	.|.	.|.	.|.	.|.
chr13:70765841-70765877	.|.	.|.	.|.	.|.	.|.	.|.	.|.	.|.	.|.	.|.	.|.	.|.	.|.	.|.	.|.	.|.	.|.	.|.	30|30	26|26	.|.	.|.	.|.	.|.	.|.	.|.	24|26	.|.	.|.	.|.	.|.	.|.	.|.	.|.	.|.	.|.	.|.	.|.	.|.	.|.	.|.	.|.	.|.	.|.	.|.	.|.	.|.	.|.	.|.
chr13:70924035-70924081	.|.	.|.	.|.	.|.	34|34	.|.	.|.	.|.	34|36	.|.	.|.	.|.	.|.	.|.	.|.	.|.	.|.	.|.	.|.	.|.	.|.	.|.	34|36	.|.	.|.	.|.	.|.	.|.	.|.	.|.	34|38	.|.	.|.	36|38	.|.	.|.	.|.	.|.	.|.	.|.	.|.	.|.	.|.	.|.	.|.	36|36	.|.	.|.	.|.
chr13:71062931-71062955	.|.	.|.	.|.	.|.	26|26	.|.	.|.	.|.	.|.	.|.	.|.	.|.	.|.	.|.	.|.	.|.	.|.	.|.	.|.	.|.	.|.	.|.	.|.	.|.	.|.	.|.	.|.	.|.	.|.	.|.	24|26	.|.	.|.	.|.	.|.	.|.	.|.	.|.	.|.	.|.	26|26	.|.	.|.	.|.	.|.	.|.	.|.	.|.	.|.
chr13:71074495-71074543	.|.	.|.	.|.	.|.	.|.	.|.	.|.	.|.	.|.	.|.	.|.	.|.	.|.	.|.	.|.	.|.	.|.	.|.	.|.	.|.	.|.	.|.	.|.	.|.	.|.	.|.	.|.	.|.	.|.	.|.	.|.	.|.	.|.	.|.	.|.	.|.	.|.	.|.	.|.	40|44	.|.	.|.	.|.	.|.	.|.	.|.	.|.	.|.	.|.
chr13:71133160-71133190	.|.	.|.	.|.	.|.	.|.	.|.	.|.	.|.	.|.	.|.	.|.	.|.	.|.	.|.	.|.	.|.	.|.	.|.	.|.	.|.	.|.	.|.	.|.	.|.	.|.	.|.	.|.	.|.	.|.	.|.	.|.	.|.	.|.	.|.	.|.	.|.	.|.	.|.	.|.	30|30	.|.	.|.	.|.	.|.	.|.	.|.	.|.	.|.	.|.
chr13:71276081-71276119	.|.	.|.	.|.	.|.	.|.	.|.	.|.	.|.	.|.	.|.	.|.	.|.	.|.	.|.	54|56	.|.	.|.	.|.	.|.	.|.	.|.	.|.	.|.	.|.	.|.	.|.	.|.	.|.	.|.	.|.	.|.	.|.	.|.	.|.	.|.	.|.	.|.	.|.	.|.	.|.	.|.	.|.	.|.	.|.	.|.	.|.	.|.	.|.	.|.
chr13:71325856-71325880	.|.	.|.	.|.	.|.	.|.	.|.	.|.	.|.	.|.	.|.	.|.	.|.	.|.	.|.	.|.	.|.	.|.	.|.	.|.	.|.	.|.	.|.	24|24	.|.	.|.	.|.	.|.	.|.	.|.	.|.	.|.	24|24	.|.	.|.	.|.	.|.	.|.	.|.	.|.	.|.	.|.	.|.	.|.	.|.	.|.	.|.	.|.	.|.	.|.
chr13:71341128-71341158	.|.	.|.	.|.	.|.	.|.	.|.	.|.	.|.	.|.	.|.	.|.	.|.	28|28	.|.	30|26	.|.	.|.	.|.	.|.	.|.	.|.	.|.	.|.	.|.	.|.	.|.	26|28	.|.	30|28	.|.	.|.	.|.	.|.	.|.	.|.	.|.	30|28	.|.	.|.	.|.	.|.	.|.	.|.	.|.	30|28	.|.	.|.	.|.	.|.
chr13:71749743-71749773	.|.	26|26	.|.	.|.	.|.	.|.	.|.	.|.	.|.	.|.	.|.	.|.	.|.	.|.	.|.	.|.	.|.	.|.	.|.	.|.	.|.	.|.	.|.	.|.	.|.	32|34	.|.	.|.	.|.	.|.	.|.	.|.	.|.	.|.	.|.	.|.	.|.	26|26	.|.	.|.	26|26	.|.	.|.	.|.	32|34	.|.	.|.	.|.	.|.
chr13:71868979-71869015	.|.	.|.	.|.	.|.	.|.	.|.	.|.	.|.	.|.	.|.	.|.	.|.	.|.	.|.	.|.	.|.	.|.	.|.	14|14	.|.	.|.	.|.	.|.	.|.	.|.	.|.	.|.	.|.	.|.	.|.	.|.	.|.	.|.	.|.	.|.	.|.	.|.	.|.	.|.	.|.	.|.	.|.	.|.	.|.	.|.	.|.	.|.	.|.	.|.
chr13:72494665-72494693	.|.	26|30	.|.	.|.	.|.	.|.	.|.	.|.	.|.	.|.	.|.	.|.	.|.	40|44	.|.	.|.	.|.	.|.	38|42	.|.	.|.	.|.	.|.	.|.	40|42	.|.	.|.	32|42	.|.	.|.	.|.	.|.	.|.	.|.	.|.	.|.	34|36	.|.	.|.	.|.	.|.	.|.	.|.	.|.	.|.	.|.	.|.	38|42	.|.
chr13:72512031-72512059	.|.	.|.	.|.	.|.	.|.	.|.	.|.	.|.	.|.	24|24	.|.	.|.	.|.	.|.	.|.	.|.	.|.	.|.	.|.	.|.	.|.	.|.	.|.	.|.	.|.	.|.	.|.	.|.	.|.	.|.	.|.	.|.	.|.	.|.	.|.	.|.	.|.	.|.	.|.	.|.	.|.	.|.	.|.	.|.	.|.	.|.	.|.	.|.	.|.
chr13:72570097-72570131	.|.	.|.	.|.	.|.	.|.	.|.	.|.	.|.	.|.	.|.	.|.	.|.	.|.	.|.	.|.	.|.	.|.	.|.	.|.	.|.	.|.	.|.	.|.	.|.	.|.	.|.	.|.	.|.	.|.	.|.	.|.	.|.	.|.	.|.	.|.	.|.	.|.	.|.	.|.	.|.	.|.	.|.	.|.	.|.	.|.	.|.	.|.	.|.	.|.
chr13:73180646-73180694	.|.	.|.	.|.	.|.	.|.	.|.	.|.	.|.	.|.	.|.	.|.	.|.	.|.	.|.	.|.	.|.	.|.	.|.	.|.	.|.	.|.	.|.	46|50	.|.	.|.	.|.	.|.	.|.	48|42	.|.	.|.	.|.	.|.	.|.	.|.	.|.	.|.	.|.	.|.	.|.	.|.	.|.	.|.	.|.	.|.	.|.	.|.	.|.	.|.
chr13:73434446-73434490	.|.	30|30	.|.	.|.	.|.	.|.	.|.	.|.	.|.	.|.	.|.	.|.	.|.	.|.	.|.	.|.	.|.	.|.	.|.	.|.	.|.	.|.	.|.	.|.	.|.	.|.	.|.	.|.	.|.	.|.	.|.	.|.	.|.	.|.	.|.	.|.	.|.	.|.	.|.	.|.	.|.	.|.	.|.	28|30	.|.	.|.	.|.	.|.	.|.
chr13:73749765-73749793	.|.	28|28	.|.	.|.	.|.	.|.	.|.	28|28	.|.	.|.	.|.	.|.	.|.	.|.	.|.	.|.	.|.	.|.	.|.	.|.	.|.	.|.	.|.	.|.	28|28	.|.	.|.	.|.	.|.	.|.	.|.	.|.	.|.	.|.	28|28	.|.	.|.	.|.	.|.	.|.	.|.	.|.	.|.	.|.	.|.	.|.	.|.	.|.	28|28
chr13:73899510-73899538	.|.	.|.	.|.	.|.	.|.	.|.	.|.	.|.	.|.	.|.	.|.	.|.	.|.	.|.	.|.	.|.	.|.	.|.	.|.	.|.	.|.	.|.	.|.	.|.	.|.	24|24	.|.	28|30	.|.	.|.	.|.	.|.	.|.	.|.	.|.	.|.	.|.	24|24	.|.	.|.	.|.	.|.	.|.	.|.	.|.	.|.	.|.	.|.	.|.
chr13:74041937-74041979	.|.	.|.	.|.	.|.	.|.	.|.	.|.	.|.	44|46	42|46	.|.	50|48	.|.	.|.	.|.	.|.	44|48	44|46	.|.	.|.	.|.	.|.	44|48	.|.	44|48	.|.	42|48	48|48	.|.	.|.	44|46	.|.	42|46	.|.	.|.	44|46	44|46	.|.	44|48	.|.	.|.	.|.	44|48	.|.	44|48	.|.	40|44	.|.	.|.
chr13:74830825-74830855	.|.	.|.	.|.	.|.	.|.	.|.	.|.	42|44	.|.	.|.	.|.	.|.	42|44	.|.	.|.	.|.	.|.	42|44	.|.	26|44	.|.	.|.	.|.	.|.	.|.	.|.	26|26	42|44	.|.	.|.	.|.	.|.	.|.	.|.	.|.	26|26	26|26	42|44	.|.	.|.	26|44	.|.	26|44	42|44	.|.	24|26	.|.	38|44	.|.
chr13:75127912-75127948	.|.	.|.	.|.	.|.	.|.	.|.	.|.	.|.	.|.	26|28	.|.	.|.	.|.	.|.	.|.	.|.	.|.	.|.	.|.	.|.	26|28	.|.	.|.	.|.	.|.	.|.	.|.	.|.	.|.	.|.	.|.	.|.	.|.	.|.	.|.	.|.	.|.	.|.	.|.	20|20	.|.	.|.	.|.	.|.	.|.	.|.	.|.	.|.	.|.
chr13:75967252-75967292	.|.	.|.	.|.	.|.	.|.	.|.	.|.	.|.	.|.	.|.	.|.	.|.	.|.	.|.	.|.	.|.	.|.	.|.	.|.	.|.	.|.	.|.	.|.	.|.	.|.	.|.	.|.	.|.	.|.	.|.	.|.	.|.	.|.	.|.	.|.	.|.	.|.	.|.	.|.	34|36	.|.	.|.	.|.	.|.	.|.	.|.	.|.	.|.	.|.
chr13:75976790-75976832	.|.	.|.	.|.	.|.	.|.	.|.	.|.	38|40	.|.	.|.	.|.	.|.	.|.	.|.	.|.	.|.	.|.	.|.	.|.	.|.	.|.	.|.	.|.	.|.	36|36	.|.	.|.	.|.	42|38	.|.	36|38	.|.	.|.	.|.	.|.	.|.	.|.	.|.	.|.	.|.	.|.	.|.	.|.	.|.	.|.	.|.	32|38	.|.	.|.
chr13:76226750-76226794	.|.	.|.	.|.	.|.	.|.	.|.	.|.	.|.	.|.	.|.	.|.	.|.	.|.	.|.	34|36	.|.	.|.	32|34	.|.	.|.	.|.	.|.	30|32	.|.	.|.	.|.	.|.	.|.	.|.	30|32	.|.	.|.	.|.	.|.	.|.	.|.	.|.	.|.	.|.	.|.	.|.	.|.	.|.	.|.	.|.	.|.	.|.	.|.	.|.
chr13:76453474-76453516	.|.	.|.	.|.	.|.	.|.	44|46	.|.	.|.	34|36	.|.	.|.	.|.	.|.	.|.	.|.	.|.	.|.	.|.	.|.	.|.	.|.	.|.	.|.	.|.	42|44	.|.	.|.	.|.	.|.	.|.	.|.	.|.	.|.	.|.	.|.	.|.	.|.	.|.	.|.	42|44	.|.	.|.	.|.	.|.	.|.	.|.	.|.	.|.	.|.
chr13:76616669-76616695	.|.	.|.	.|.	.|.	.|.	.|.	.|.	.|.	.|.	30|32	.|.	.|.	.|.	.|.	.|.	.|.	.|.	.|.	.|.	.|.	.|.	.|.	.|.	30|32	.|.	.|.	.|.	.|.	.|.	.|.	.|.	.|.	.|.	.|.	.|.	.|.	.|.	.|.	.|.	.|.	.|.	.|.	.|.	.|.	.|.	.|.	.|.	.|.	.|.
chr13:76657628-76657658	22|22	.|.	.|.	.|.	22|22	.|.	38|38	.|.	22|38	36|38	36|38	22|22	.|.	.|.	22|38	22|22	.|.	.|.	.|.	36|38	.|.	36|38	.|.	.|.	22|38	34|36	22|22	.|.	22|38	.|.	34|38	.|.	.|.	.|.	.|.	.|.	22|22	36|38	.|.	.|.	38|36	22|38	.|.	.|.	.|.	36|38	32|38	22|38	.|.
chr13:77203619-77203643	.|.	.|.	.|.	.|.	.|.	.|.	.|.	.|.	.|.	.|.	.|.	.|.	.|.	.|.	.|.	18|18	.|.	.|.	.|.	.|.	.|.	24|24	.|.	.|.	.|.	.|.	.|.	.|.	.|.	.|.	.|.	.|.	.|.	.|.	.|.	.|.	.|.	.|.	.|.	.|.	.|.	.|.	.|.	.|.	.|.	.|.	.|.	.|.	.|.
chr13:78052278-78052314	36|30	36|32	.|.	.|.	34|28	.|.	.|.	36|32	.|.	36|30	.|.	36|32	.|.	.|.	.|.	36|32	.|.	.|.	.|.	32|28	.|.	.|.	.|.	34|30	.|.	.|.	.|.	34|30	.|.	.|.	.|.	.|.	.|.	36|30	.|.	.|.	.|.	.|.	36|32	.|.	36|32	34|30	.|.	34|30	.|.	.|.	.|.	34|30	.|.
chr13:78275866-78275890	.|.	24|24	.|.	.|.	.|.	.|.	.|.	24|24	.|.	.|.	.|.	.|.	.|.	.|.	.|.	.|.	.|.	.|.	.|.	.|.	.|.	.|.	24|24	.|.	.|.	.|.	.|.	.|.	.|.	.|.	.|.	24|24	.|.	.|.	.|.	.|.	.|.	.|.	.|.	.|.	24|24	.|.	.|.	.|.	.|.	.|.	.|.	.|.	.|.
chr13:78755494-78755532	.|.	38|36	.|.	.|.	38|38	.|.	.|.	.|.	.|.	38|36	.|.	38|38	.|.	.|.	38|40	38|40	.|.	38|38	.|.	38|38	.|.	.|.	.|.	.|.	.|.	38|38	.|.	.|.	38|40	.|.	.|.	.|.	36|40	.|.	.|.	.|.	.|.	.|.	.|.	.|.	.|.	38|38	.|.	.|.	.|.	.|.	.|.	.|.	.|.
chr13:79162512-79162546	.|.	34|32	.|.	.|.	.|.	.|.	.|.	.|.	.|.	.|.	.|.	.|.	.|.	26|26	.|.	.|.	.|.	.|.	.|.	30|32	.|.	26|26	.|.	.|.	24|26	.|.	.|.	.|.	30|32	26|26	.|.	.|.	28|32	.|.	.|.	24|26	.|.	26|26	24|26	.|.	26|26	34|30	.|.	.|.	26|26	.|.	.|.	.|.	.|.
chr13:79614977-79615015	.|.	.|.	.|.	.|.	.|.	.|.	.|.	.|.	.|.	.|.	.|.	36|40	.|.	.|.	.|.	.|.	.|.	.|.	.|.	.|.	.|.	.|.	.|.	.|.	.|.	.|.	.|.	.|.	.|.	.|.	.|.	.|.	.|.	.|.	.|.	.|.	.|.	.|.	.|.	.|.	.|.	.|.	.|.	.|.	.|.	.|.	.|.	.|.	.|.
chr13:79727559-79727603	.|.	.|.	.|.	.|.	32|34	.|.	.|.	.|.	.|.	34|36	.|.	.|.	.|.	.|.	.|.	.|.	.|.	.|.	.|.	.|.	.|.	.|.	34|36	.|.	.|.	34|34	.|.	34|34	.|.	.|.	.|.	.|.	.|.	.|.	.|.	.|.	.|.	.|.	32|34	.|.	.|.	.|.	.|.	.|.	.|.	.|.	.|.	.|.	.|.
chr13:80319167-80319209	.|.	.|.	.|.	.|.	.|.	.|.	.|.	.|.	.|.	.|.	.|.	.|.	.|.	.|.	46|46	.|.	.|.	.|.	.|.	.|.	.|.	50|52	.|.	.|.	.|.	.|.	.|.	.|.	34|36	.|.	.|.	.|.	.|.	.|.	.|.	.|.	.|.	.|.	.|.	.|.	.|.	.|.	.|.	46|50	.|.	.|.	.|.	.|.	.|.
chr13:81109275-81109319	.|.	40|44	.|.	.|.	.|.	40|44	.|.	.|.	.|.	.|.	.|.	.|.	.|.	.|.	.|.	.|.	.|.	.|.	.|.	42|44	.|.	40|44	42|44	.|.	.|.	.|.	.|.	.|.	.|.	.|.	44|48	42|44	.|.	.|.	.|.	.|.	.|.	.|.	40|44	40|44	.|.	40|44	.|.	40|44	.|.	.|.	.|.	38|44	.|.
chr13:81541492-81541526	.|.	.|.	.|.	.|.	.|.	.|.	.|.	.|.	.|.	.|.	.|.	.|.	.|.	.|.	.|.	.|.	.|.	.|.	.|.	.|.	.|.	.|.	.|.	.|.	.|.	.|.	.|.	.|.	.|.	.|.	.|.	.|.	.|.	.|.	.|.	.|.	.|.	.|.	.|.	.|.	.|.	.|.	.|.	24|26	.|.	.|.	.|.	.|.	.|.
chr13:81584976-81585020	.|.	.|.	.|.	.|.	46|48	.|.	.|.	.|.	.|.	.|.	.|.	.|.	.|.	.|.	44|48	.|.	.|.	.|.	.|.	.|.	.|.	.|.	46|46	.|.	42|46	.|.	.|.	.|.	44|46	.|.	44|46	.|.	44|48	.|.	.|.	44|42	48|50	.|.	44|46	46|48	48|50	.|.	44|46	46|50	.|.	.|.	.|.	.|.	46|48
chr13:81680268-81680300	34|36	.|.	.|.	28|28	.|.	.|.	.|.	.|.	.|.	.|.	.|.	.|.	34|36	.|.	34|36	.|.	32|36	.|.	.|.	.|.	.|.	.|.	.|.	34|36	34|36	.|.	.|.	30|36	.|.	.|.	.|.	.|.	26|30	.|.	.|.	26|28	38|38	.|.	36|38	28|30	.|.	36|38	.|.	36|38	.|.	.|.	.|.	.|.	.|.
chr13:81753657-81753695	.|.	56|58	.|.	.|.	.|.	.|.	.|.	.|.	.|.	.|.	.|.	.|.	.|.	.|.	.|.	.|.	56|58	.|.	.|.	56|58	.|.	.|.	56|58	.|.	.|.	.|.	.|.	.|.	.|.	38|38	.|.	.|.	48|52	.|.	.|.	.|.	.|.	.|.	.|.	.|.	.|.	.|.	.|.	.|.	.|.	50|52	48|50	.|.	.|.
chr13:82146932-82146966	.|.	.|.	.|.	.|.	.|.	.|.	.|.	.|.	.|.	38|42	.|.	.|.	.|.	.|.	.|.	.|.	.|.	.|.	.|.	.|.	30|32	.|.	.|.	.|.	.|.	.|.	30|30	.|.	.|.	.|.	.|.	.|.	.|.	.|.	.|.	.|.	.|.	.|.	.|.	.|.	.|.	.|.	.|.	30|32	.|.	.|.	.|.	.|.	.|.
chr13:82196384-82196408	.|.	.|.	.|.	.|.	.|.	.|.	.|.	.|.	.|.	.|.	.|.	24|26	.|.	.|.	.|.	.|.	.|.	.|.	.|.	.|.	.|.	.|.	.|.	.|.	.|.	.|.	.|.	.|.	.|.	.|.	.|.	.|.	.|.	.|.	.|.	.|.	.|.	.|.	.|.	.|.	.|.	.|.	.|.	.|.	.|.	.|.	.|.	.|.	.|.
chr13:82232487-82232519	.|.	.|.	.|.	.|.	.|.	.|.	.|.	.|.	.|.	.|.	.|.	.|.	.|.	.|.	.|.	.|.	.|.	.|.	.|.	.|.	.|.	.|.	.|.	.|.	.|.	.|.	.|.	.|.	.|.	.|.	.|.	.|.	.|.	.|.	.|.	.|.	.|.	.|.	.|.	.|.	.|.	.|.	.|.	.|.	.|.	.|.	.|.	.|.	.|.
chr13:82423212-82423236	.|.	.|.	.|.	.|.	.|.	.|.	.|.	.|.	.|.	.|.	.|.	.|.	.|.	.|.	.|.	.|.	.|.	.|.	.|.	.|.	.|.	.|.	.|.	.|.	24|24	.|.	.|.	.|.	.|.	.|.	.|.	.|.	.|.	.|.	.|.	.|.	.|.	.|.	.|.	.|.	.|.	.|.	.|.	.|.	.|.	.|.	.|.	.|.	.|.
chr13:82795551-82795575	.|.	.|.	.|.	.|.	.|.	.|.	.|.	.|.	.|.	.|.	.|.	.|.	.|.	.|.	.|.	.|.	.|.	.|.	.|.	.|.	.|.	24|24	.|.	.|.	.|.	.|.	.|.	.|.	.|.	.|.	.|.	24|24	.|.	.|.	.|.	24|24	.|.	.|.	.|.	.|.	.|.	.|.	.|.	.|.	.|.	.|.	.|.	.|.	.|.
chr13:82985894-82985920	.|.	.|.	.|.	.|.	.|.	.|.	.|.	.|.	.|.	.|.	.|.	.|.	.|.	.|.	.|.	.|.	.|.	.|.	.|.	.|.	.|.	.|.	.|.	.|.	.|.	.|.	.|.	.|.	.|.	.|.	.|.	.|.	.|.	.|.	.|.	.|.	.|.	26|28	.|.	.|.	.|.	.|.	.|.	.|.	.|.	.|.	.|.	.|.	.|.
chr13:83553330-83553358	.|.	28|28	.|.	.|.	.|.	.|.	.|.	.|.	.|.	.|.	24|24	.|.	.|.	.|.	.|.	24|24	.|.	.|.	.|.	28|28	.|.	.|.	28|28	.|.	24|24	28|28	28|28	.|.	24|24	.|.	24|24	.|.	28|28	.|.	.|.	28|26	.|.	.|.	.|.	24|24	24|24	.|.	28|28	24|24	.|.	.|.	.|.	.|.	24|24
chr13:83872675-83872719	.|.	.|.	.|.	.|.	.|.	.|.	48|50	.|.	.|.	.|.	.|.	.|.	.|.	.|.	.|.	.|.	.|.	.|.	.|.	.|.	.|.	.|.	.|.	50|50	48|52	48|50	.|.	.|.	50|50	.|.	50|50	.|.	.|.	.|.	.|.	.|.	.|.	.|.	.|.	48|50	.|.	.|.	.|.	.|.	.|.	.|.	.|.	38|40	.|.
chr13:83882292-83882316	.|.	.|.	.|.	.|.	.|.	.|.	.|.	.|.	.|.	28|28	.|.	.|.	.|.	.|.	.|.	.|.	.|.	.|.	.|.	.|.	.|.	26|28	.|.	.|.	.|.	.|.	.|.	.|.	.|.	.|.	22|22	.|.	.|.	.|.	.|.	.|.	.|.	.|.	.|.	.|.	.|.	.|.	.|.	.|.	.|.	.|.	.|.	.|.	.|.
chr13:83894197-83894221	.|.	.|.	.|.	.|.	.|.	.|.	.|.	.|.	.|.	24|24	.|.	.|.	.|.	.|.	.|.	.|.	.|.	.|.	.|.	.|.	.|.	.|.	.|.	.|.	.|.	24|24	.|.	.|.	.|.	.|.	.|.	.|.	.|.	.|.	24|24	.|.	.|.	.|.	.|.	.|.	.|.	.|.	.|.	.|.	.|.	.|.	.|.	.|.	.|.
chr13:84245388-84245418	.|.	.|.	.|.	.|.	.|.	.|.	.|.	.|.	.|.	.|.	.|.	.|.	.|.	.|.	.|.	.|.	.|.	.|.	.|.	.|.	.|.	.|.	.|.	.|.	.|.	.|.	30|28	.|.	.|.	.|.	.|.	30|28	.|.	.|.	.|.	.|.	30|30	.|.	.|.	.|.	.|.	.|.	.|.	.|.	.|.	.|.	.|.	.|.	.|.
chr13:84373964-84373998	.|.	.|.	.|.	.|.	.|.	.|.	.|.	.|.	.|.	.|.	.|.	28|30	.|.	.|.	.|.	.|.	.|.	.|.	.|.	.|.	.|.	.|.	.|.	.|.	30|30	.|.	.|.	.|.	.|.	.|.	.|.	.|.	.|.	.|.	.|.	.|.	.|.	.|.	.|.	.|.	.|.	.|.	.|.	.|.	.|.	.|.	.|.	.|.	.|.
chr13:84733868-84733896	.|.	.|.	.|.	.|.	.|.	.|.	.|.	.|.	.|.	.|.	.|.	.|.	.|.	.|.	.|.	.|.	.|.	.|.	.|.	.|.	.|.	.|.	28|28	.|.	.|.	.|.	.|.	.|.	28|28	.|.	.|.	.|.	.|.	.|.	.|.	.|.	.|.	28|28	.|.	.|.	.|.	.|.	.|.	.|.	.|.	.|.	28|28	.|.	.|.
chr13:84800565-84800607	.|.	.|.	.|.	.|.	.|.	.|.	.|.	.|.	.|.	.|.	.|.	.|.	.|.	.|.	.|.	.|.	.|.	.|.	.|.	.|.	.|.	.|.	.|.	.|.	.|.	.|.	.|.	.|.	.|.	.|.	.|.	.|.	.|.	.|.	.|.	.|.	.|.	.|.	.|.	.|.	.|.	.|.	.|.	.|.	.|.	.|.	.|.	.|.	.|.
chr13:85344738-85344782	.|.	.|.	.|.	.|.	.|.	.|.	.|.	44|36	34|36	.|.	.|.	.|.	.|.	.|.	.|.	.|.	.|.	.|.	34|36	44|42	.|.	.|.	.|.	36|36	.|.	44|42	.|.	.|.	34|36	.|.	.|.	42|42	44|42	.|.	44|46	.|.	.|.	.|.	.|.	44|42	34|36	32|36	.|.	.|.	.|.	34|36	34|36	.|.	44|40
chr13:85370951-85370989	.|.	.|.	.|.	.|.	.|.	.|.	.|.	.|.	.|.	.|.	.|.	44|40	.|.	.|.	.|.	.|.	.|.	.|.	.|.	.|.	.|.	.|.	.|.	.|.	.|.	.|.	.|.	.|.	.|.	.|.	.|.	.|.	.|.	.|.	.|.	.|.	.|.	.|.	.|.	.|.	.|.	.|.	.|.	.|.	.|.	.|.	.|.	.|.	.|.
chr13:85442490-85442540	.|.	.|.	.|.	.|.	.|.	.|.	.|.	.|.	.|.	.|.	.|.	.|.	.|.	.|.	30|34	.|.	.|.	.|.	.|.	34|34	.|.	28|26	.|.	28|26	28|26	.|.	28|26	32|34	.|.	.|.	.|.	.|.	.|.	.|.	.|.	.|.	.|.	.|.	.|.	.|.	28|26	.|.	28|26	28|26	.|.	.|.	.|.	.|.	32|34
chr13:85606426-85606472	.|.	40|40	.|.	.|.	.|.	.|.	.|.	.|.	.|.	38|38	.|.	.|.	.|.	38|40	.|.	.|.	.|.	.|.	.|.	42|42	.|.	.|.	.|.	38|40	.|.	.|.	.|.	.|.	.|.	.|.	.|.	.|.	.|.	.|.	.|.	.|.	.|.	.|.	.|.	.|.	38|40	.|.	.|.	.|.	.|.	38|40	38|40	38|40	.|.
chr13:85659560-85659590	.|.	.|.	.|.	.|.	.|.	.|.	.|.	.|.	.|.	.|.	.|.	.|.	.|.	.|.	.|.	.|.	.|.	.|.	.|.	.|.	.|.	.|.	.|.	.|.	.|.	24|28	.|.	.|.	.|.	.|.	.|.	.|.	.|.	26|26	.|.	28|28	.|.	.|.	.|.	.|.	.|.	.|.	.|.	.|.	26|26	.|.	.|.	.|.	.|.
chr13:85960441-85960473	26|26	.|.	.|.	.|.	.|.	.|.	.|.	.|.	26|26	26|26	.|.	.|.	.|.	.|.	.|.	.|.	.|.	.|.	.|.	.|.	26|26	22|22	.|.	.|.	.|.	.|.	.|.	.|.	.|.	.|.	.|.	.|.	22|22	.|.	.|.	.|.	.|.	.|.	.|.	.|.	.|.	.|.	.|.	.|.	.|.	.|.	.|.	.|.	.|.
chr13:86414226-86414254	.|.	30|32	.|.	.|.	.|.	.|.	.|.	.|.	.|.	.|.	.|.	.|.	.|.	.|.	.|.	.|.	.|.	.|.	.|.	.|.	.|.	.|.	.|.	.|.	.|.	.|.	.|.	.|.	.|.	.|.	30|32	.|.	.|.	.|.	.|.	.|.	.|.	.|.	.|.	.|.	.|.	.|.	.|.	.|.	28|30	.|.	.|.	.|.	.|.
chr13:86681329-86681353	.|.	.|.	.|.	.|.	.|.	.|.	36|36	.|.	.|.	.|.	.|.	.|.	.|.	.|.	.|.	.|.	.|.	.|.	.|.	.|.	.|.	.|.	.|.	.|.	.|.	.|.	.|.	.|.	20|20	.|.	.|.	.|.	.|.	.|.	.|.	36|36	.|.	36|36	.|.	.|.	.|.	.|.	.|.	.|.	.|.	.|.	.|.	.|.	.|.
chr13:87152499-87152539	.|.	24|26	.|.	.|.	.|.	.|.	26|26	26|26	.|.	26|26	.|.	24|26	26|26	.|.	.|.	.|.	.|.	.|.	.|.	28|28	28|28	.|.	.|.	.|.	28|28	.|.	.|.	28|28	26|30	.|.	26|26	.|.	24|26	.|.	.|.	26|26	26|28	26|28	.|.	.|.	26|26	.|.	26|26	.|.	.|.	26|26	26|26	26|26	26|26
chr13:87266252-87266290	.|.	.|.	.|.	.|.	.|.	.|.	.|.	.|.	.|.	.|.	.|.	.|.	.|.	.|.	.|.	.|.	.|.	.|.	.|.	.|.	.|.	.|.	.|.	.|.	.|.	.|.	.|.	.|.	.|.	32|34	.|.	.|.	.|.	.|.	.|.	.|.	.|.	.|.	32|34	.|.	.|.	.|.	.|.	34|36	.|.	.|.	.|.	.|.	.|.
chr13:87282961-87283005	26|28	.|.	.|.	28|32	.|.	30|32	32|32	32|32	28|32	28|28	.|.	32|32	28|32	.|.	32|32	28|32	28|32	.|.	.|.	26|32	30|32	28|28	28|32	32|32	30|32	.|.	30|32	.|.	28|28	32|32	32|32	28|28	26|30	.|.	.|.	28|30	26|28	26|28	26|30	30|30	28|30	28|30	28|30	28|28	.|.	30|32	28|30	28|28	28|32
chr13:87830685-87830719	.|.	.|.	.|.	.|.	.|.	.|.	.|.	30|26	.|.	.|.	.|.	.|.	.|.	.|.	.|.	.|.	.|.	.|.	.|.	.|.	.|.	.|.	.|.	.|.	.|.	.|.	.|.	.|.	.|.	.|.	.|.	.|.	30|28	.|.	.|.	.|.	.|.	.|.	.|.	.|.	.|.	.|.	.|.	.|.	.|.	.|.	.|.	.|.	.|.
chr13:88041256-88041284	.|.	.|.	.|.	.|.	.|.	.|.	.|.	.|.	32|32	.|.	.|.	.|.	30|32	.|.	.|.	.|.	.|.	.|.	.|.	32|32	.|.	.|.	.|.	.|.	.|.	.|.	.|.	.|.	.|.	.|.	.|.	.|.	.|.	.|.	.|.	30|32	.|.	.|.	.|.	.|.	.|.	.|.	.|.	.|.	.|.	30|32	.|.	.|.	.|.
chr13:88179263-88179311	.|.	.|.	.|.	.|.	.|.	.|.	.|.	.|.	.|.	.|.	40|44	.|.	.|.	.|.	.|.	.|.	.|.	.|.	.|.	.|.	.|.	.|.	.|.	.|.	.|.	42|38	.|.	.|.	.|.	.|.	.|.	.|.	.|.	.|.	.|.	.|.	.|.	.|.	.|.	.|.	.|.	.|.	.|.	.|.	.|.	.|.	.|.	.|.	.|.
chr13:88571441-88571465	.|.	.|.	.|.	.|.	.|.	.|.	.|.	.|.	.|.	.|.	.|.	.|.	.|.	.|.	.|.	.|.	.|.	.|.	.|.	.|.	.|.	.|.	.|.	.|.	.|.	.|.	.|.	.|.	.|.	.|.	.|.	.|.	.|.	.|.	.|.	.|.	.|.	.|.	.|.	.|.	.|.	.|.	.|.	.|.	.|.	.|.	.|.	.|.	.|.
chr13:88607123-88607149	.|.	.|.	.|.	.|.	22|22	.|.	.|.	.|.	.|.	.|.	.|.	.|.	.|.	.|.	.|.	.|.	.|.	.|.	.|.	.|.	.|.	.|.	.|.	26|26	.|.	.|.	.|.	.|.	.|.	.|.	.|.	.|.	.|.	.|.	.|.	.|.	.|.	.|.	.|.	.|.	.|.	.|.	.|.	.|.	.|.	.|.	.|.	.|.	.|.
chr13:89292260-89292285	.|.	.|.	.|.	.|.	.|.	.|.	.|.	.|.	.|.	.|.	.|.	.|.	.|.	.|.	.|.	.|.	.|.	.|.	.|.	.|.	.|.	.|.	25|20	.|.	.|.	.|.	.|.	.|.	.|.	.|.	.|.	.|.	.|.	.|.	.|.	25|25	.|.	.|.	.|.	.|.	.|.	.|.	.|.	.|.	.|.	.|.	.|.	.|.	.|.
chr13:89524701-89524743	30|32	.|.	30|32	.|.	.|.	.|.	.|.	.|.	.|.	.|.	.|.	.|.	.|.	.|.	42|40	30|32	.|.	.|.	28|30	.|.	.|.	.|.	.|.	.|.	30|32	.|.	28|32	30|32	.|.	.|.	38|42	.|.	.|.	.|.	.|.	30|32	.|.	.|.	.|.	.|.	30|32	.|.	.|.	30|32	.|.	.|.	.|.	40|44	42|40
chr13:89571096-89571124	.|.	.|.	.|.	.|.	.|.	.|.	.|.	.|.	.|.	.|.	.|.	28|28	28|26	28|28	.|.	.|.	.|.	.|.	.|.	.|.	.|.	.|.	.|.	.|.	.|.	.|.	.|.	.|.	.|.	.|.	.|.	.|.	.|.	.|.	.|.	.|.	.|.	.|.	.|.	.|.	28|30	.|.	.|.	.|.	.|.	.|.	.|.	.|.	.|.
chr13:90194622-90194646	.|.	.|.	.|.	.|.	.|.	.|.	.|.	.|.	.|.	.|.	.|.	.|.	.|.	.|.	.|.	.|.	.|.	.|.	.|.	.|.	.|.	.|.	.|.	.|.	.|.	.|.	.|.	.|.	.|.	.|.	.|.	.|.	.|.	.|.	.|.	.|.	.|.	.|.	28|30	.|.	28|30	.|.	.|.	.|.	.|.	.|.	.|.	.|.	.|.
chr13:90198137-90198171	.|.	.|.	.|.	.|.	.|.	.|.	.|.	.|.	.|.	.|.	.|.	.|.	.|.	30|32	.|.	.|.	.|.	.|.	.|.	28|30	28|28	.|.	26|30	.|.	28|28	.|.	.|.	28|30	.|.	.|.	28|30	.|.	.|.	.|.	.|.	28|30	.|.	.|.	28|30	30|32	28|32	30|32	.|.	.|.	28|30	.|.	.|.	.|.	.|.
chr13:90225824-90225848	.|.	.|.	.|.	.|.	24|24	.|.	.|.	.|.	24|24	.|.	.|.	.|.	.|.	.|.	.|.	.|.	.|.	.|.	.|.	24|24	.|.	.|.	.|.	.|.	.|.	.|.	.|.	.|.	.|.	.|.	.|.	.|.	.|.	.|.	.|.	.|.	.|.	.|.	.|.	.|.	.|.	.|.	.|.	.|.	.|.	.|.	.|.	24|24	.|.
chr13:90496973-90496999	.|.	24|24	.|.	.|.	.|.	24|24	.|.	.|.	.|.	.|.	.|.	.|.	.|.	.|.	.|.	.|.	.|.	.|.	.|.	26|28	.|.	.|.	.|.	.|.	.|.	.|.	.|.	.|.	24|24	.|.	.|.	26|28	.|.	.|.	.|.	.|.	.|.	.|.	.|.	.|.	.|.	.|.	.|.	.|.	.|.	.|.	.|.	.|.	.|.
chr13:90741756-90741788	.|.	.|.	.|.	.|.	.|.	.|.	.|.	.|.	.|.	.|.	.|.	.|.	.|.	.|.	.|.	.|.	.|.	.|.	.|.	.|.	.|.	.|.	.|.	.|.	32|34	.|.	32|34	.|.	.|.	.|.	32|34	.|.	34|34	.|.	.|.	34|34	.|.	.|.	.|.	.|.	.|.	.|.	.|.	.|.	.|.	.|.	.|.	.|.	.|.
chr13:90761726-90761754	.|.	28|42	28|26	40|42	.|.	38|40	.|.	28|42	28|42	28|42	.|.	28|42	38|44	28|28	28|46	36|42	40|44	.|.	40|44	28|44	28|26	28|28	38|44	28|42	40|44	28|44	28|46	28|44	28|44	.|.	28|44	.|.	42|46	.|.	26|26	26|44	44|46	26|26	26|44	26|44	26|44	26|46	26|42	26|46	.|.	26|44	26|44	26|44	28|44
chr13:91081694-91081722	.|.	.|.	.|.	.|.	28|30	34|36	.|.	.|.	.|.	.|.	34|36	.|.	.|.	.|.	.|.	.|.	.|.	.|.	.|.	.|.	28|30	30|30	28|30	.|.	.|.	.|.	.|.	.|.	.|.	.|.	.|.	.|.	.|.	.|.	.|.	.|.	.|.	.|.	.|.	28|30	.|.	.|.	.|.	.|.	.|.	.|.	.|.	.|.	.|.
chr13:91849620-91849672	.|.	.|.	.|.	.|.	.|.	.|.	48|50	.|.	.|.	.|.	.|.	.|.	.|.	.|.	.|.	46|50	.|.	.|.	.|.	44|48	.|.	.|.	42|46	.|.	.|.	.|.	.|.	.|.	.|.	.|.	.|.	.|.	.|.	.|.	.|.	44|46	.|.	.|.	.|.	.|.	.|.	.|.	.|.	.|.	.|.	.|.	.|.	.|.	.|.
chr13:92299324-92299366	.|.	.|.	.|.	.|.	.|.	.|.	.|.	.|.	.|.	.|.	.|.	.|.	.|.	.|.	.|.	.|.	.|.	.|.	.|.	.|.	.|.	.|.	.|.	.|.	.|.	.|.	.|.	.|.	.|.	40|40	.|.	.|.	.|.	.|.	.|.	.|.	.|.	.|.	.|.	.|.	.|.	.|.	.|.	40|40	.|.	.|.	.|.	.|.	.|.
chr13:92453507-92453547	.|.	.|.	.|.	.|.	.|.	.|.	.|.	.|.	.|.	.|.	.|.	.|.	.|.	.|.	.|.	.|.	.|.	.|.	.|.	.|.	.|.	.|.	.|.	.|.	.|.	.|.	34|34	.|.	.|.	.|.	.|.	.|.	.|.	.|.	.|.	.|.	.|.	.|.	.|.	.|.	.|.	.|.	.|.	34|34	.|.	.|.	.|.	.|.	.|.
chr13:92549589-92549623	.|.	.|.	.|.	.|.	24|26	.|.	.|.	.|.	.|.	.|.	.|.	22|26	.|.	.|.	.|.	24|26	.|.	.|.	.|.	28|28	.|.	.|.	.|.	26|28	.|.	.|.	26|28	.|.	.|.	.|.	.|.	.|.	26|28	.|.	.|.	.|.	.|.	26|28	.|.	.|.	.|.	.|.	.|.	26|28	.|.	.|.	.|.	.|.	.|.
chr13:93732281-93732327	.|.	30|28	.|.	.|.	.|.	.|.	.|.	.|.	.|.	.|.	.|.	.|.	.|.	.|.	.|.	.|.	.|.	.|.	.|.	.|.	.|.	.|.	.|.	.|.	.|.	.|.	26|22	26|22	.|.	.|.	.|.	.|.	.|.	.|.	.|.	.|.	32|28	.|.	.|.	30|32	.|.	.|.	.|.	.|.	.|.	.|.	.|.	.|.	.|.
chr13:93808430-93808464	38|40	.|.	.|.	30|32	.|.	.|.	.|.	.|.	32|32	.|.	.|.	.|.	.|.	.|.	.|.	.|.	.|.	.|.	.|.	28|32	.|.	.|.	.|.	.|.	36|38	.|.	.|.	.|.	.|.	.|.	.|.	.|.	.|.	.|.	.|.	.|.	.|.	.|.	.|.	.|.	.|.	.|.	.|.	.|.	.|.	.|.	.|.	.|.	32|38
chr13:93914178-93914220	.|.	.|.	.|.	.|.	.|.	.|.	.|.	.|.	.|.	.|.	.|.	36|38	.|.	.|.	.|.	.|.	.|.	.|.	.|.	38|40	.|.	.|.	.|.	.|.	36|38	.|.	.|.	.|.	.|.	.|.	38|38	.|.	.|.	.|.	.|.	.|.	34|38	.|.	.|.	.|.	.|.	.|.	.|.	.|.	.|.	.|.	.|.	.|.	.|.
chr13:94047047-94047071	.|.	.|.	.|.	.|.	.|.	.|.	.|.	.|.	.|.	.|.	.|.	.|.	.|.	.|.	.|.	.|.	.|.	.|.	.|.	.|.	.|.	.|.	.|.	.|.	.|.	.|.	.|.	.|.	.|.	.|.	.|.	.|.	.|.	.|.	.|.	.|.	.|.	.|.	.|.	.|.	.|.	.|.	.|.	.|.	.|.	.|.	.|.	.|.	.|.
chr13:94305828-94305866	.|.	.|.	.|.	.|.	.|.	.|.	.|.	.|.	.|.	.|.	.|.	.|.	.|.	.|.	.|.	.|.	.|.	.|.	.|.	.|.	.|.	.|.	.|.	.|.	.|.	.|.	.|.	.|.	.|.	.|.	.|.	.|.	.|.	.|.	.|.	.|.	.|.	.|.	.|.	.|.	32|34	.|.	.|.	.|.	.|.	.|.	.|.	.|.	.|.
chr13:94563659-94563689	.|.	.|.	.|.	24|22	.|.	.|.	.|.	24|22	.|.	.|.	.|.	.|.	.|.	.|.	.|.	.|.	.|.	.|.	.|.	.|.	.|.	.|.	.|.	.|.	.|.	.|.	24|22	.|.	24|26	.|.	.|.	.|.	24|22	.|.	24|22	.|.	.|.	.|.	.|.	.|.	.|.	.|.	24|26	.|.	.|.	24|22	.|.	.|.	.|.
chr13:95738341-95738373	.|.	.|.	.|.	.|.	38|38	.|.	38|64	.|.	.|.	.|.	.|.	.|.	.|.	.|.	.|.	.|.	.|.	.|.	.|.	38|38	.|.	.|.	.|.	.|.	38|38	38|38	.|.	.|.	.|.	.|.	38|38	.|.	.|.	.|.	.|.	.|.	.|.	.|.	.|.	64|62	.|.	.|.	.|.	.|.	.|.	.|.	.|.	.|.	.|.
chr13:95761645-95761673	.|.	.|.	38|42	.|.	.|.	.|.	.|.	40|42	.|.	.|.	28|30	38|42	.|.	.|.	.|.	.|.	36|40	.|.	38|38	36|38	.|.	.|.	.|.	28|30	30|30	36|40	30|30	.|.	.|.	.|.	30|40	38|42	.|.	38|42	.|.	.|.	.|.	.|.	36|42	38|42	26|30	.|.	.|.	.|.	28|30	40|44	28|30	.|.	.|.
chr13:95948389-95948437	.|.	.|.	.|.	.|.	.|.	.|.	.|.	32|34	.|.	32|32	.|.	32|34	.|.	.|.	.|.	.|.	.|.	.|.	.|.	.|.	.|.	.|.	.|.	.|.	.|.	32|34	.|.	.|.	.|.	.|.	.|.	.|.	.|.	.|.	.|.	32|34	.|.	.|.	32|34	.|.	32|34	.|.	.|.	.|.	.|.	.|.	.|.	.|.	.|.
chr13:96600472-96600506	.|.	.|.	.|.	.|.	.|.	.|.	.|.	.|.	.|.	.|.	.|.	.|.	.|.	.|.	.|.	.|.	.|.	.|.	.|.	.|.	.|.	.|.	.|.	.|.	.|.	.|.	.|.	.|.	.|.	.|.	.|.	.|.	.|.	.|.	.|.	.|.	.|.	.|.	.|.	.|.	.|.	.|.	.|.	.|.	.|.	.|.	.|.	.|.	.|.
chr13:96937164-96937228	.|.	.|.	.|.	52|52	.|.	.|.	.|.	.|.	.|.	.|.	.|.	.|.	.|.	.|.	.|.	.|.	.|.	.|.	.|.	.|.	.|.	.|.	.|.	.|.	.|.	.|.	.|.	.|.	.|.	52|52	52|52	.|.	.|.	.|.	.|.	.|.	.|.	.|.	.|.	68|68	.|.	68|68	.|.	48|52	.|.	.|.	.|.	.|.	.|.
chr13:97069986-97070014	.|.	.|.	.|.	.|.	.|.	34|34	.|.	.|.	.|.	.|.	.|.	.|.	.|.	.|.	.|.	40|38	.|.	.|.	.|.	.|.	.|.	.|.	.|.	.|.	.|.	.|.	40|38	.|.	.|.	.|.	.|.	.|.	.|.	.|.	.|.	.|.	.|.	.|.	30|34	.|.	.|.	.|.	.|.	.|.	.|.	.|.	.|.	.|.	.|.
chr13:97117201-97117241	40|38	.|.	.|.	.|.	36|38	.|.	.|.	.|.	.|.	.|.	.|.	.|.	.|.	.|.	.|.	.|.	.|.	.|.	.|.	34|38	.|.	.|.	40|40	.|.	38|38	.|.	40|38	34|38	.|.	.|.	.|.	.|.	.|.	.|.	.|.	.|.	.|.	40|38	40|38	40|36	.|.	36|38	.|.	.|.	40|38	36|38	36|38	.|.	36|38
chr13:97252583-97252613	.|.	.|.	.|.	.|.	.|.	.|.	.|.	.|.	.|.	.|.	.|.	.|.	.|.	.|.	.|.	.|.	.|.	.|.	.|.	.|.	.|.	.|.	.|.	.|.	.|.	.|.	.|.	26|30	.|.	.|.	.|.	.|.	.|.	.|.	34|34	.|.	.|.	.|.	.|.	34|34	.|.	.|.	.|.	.|.	.|.	.|.	.|.	46|48	.|.
chr13:97421988-97422028	40|30	30|30	40|38	.|.	30|30	.|.	30|30	36|38	40|30	40|40	.|.	30|30	30|30	40|36	40|38	30|30	.|.	40|40	.|.	40|38	30|30	40|36	40|38	.|.	40|30	30|30	40|30	40|30	40|30	.|.	.|.	.|.	40|30	40|36	30|30	40|34	34|38	.|.	40|30	40|30	40|30	40|40	40|30	40|30	40|30	40|40	40|30	40|38	30|30
chr13:97898529-97898563	.|.	.|.	.|.	.|.	.|.	.|.	.|.	.|.	.|.	.|.	.|.	.|.	30|32	.|.	.|.	.|.	.|.	.|.	.|.	30|32	.|.	.|.	.|.	.|.	.|.	.|.	.|.	.|.	.|.	.|.	.|.	.|.	.|.	.|.	.|.	.|.	.|.	.|.	.|.	.|.	.|.	.|.	.|.	.|.	.|.	.|.	.|.	.|.	.|.
chr13:98171080-98171112	22|22	.|.	.|.	.|.	.|.	.|.	.|.	.|.	.|.	.|.	.|.	.|.	.|.	.|.	.|.	.|.	.|.	.|.	.|.	.|.	.|.	.|.	.|.	.|.	.|.	.|.	.|.	.|.	.|.	.|.	.|.	.|.	.|.	.|.	.|.	.|.	.|.	.|.	.|.	.|.	.|.	.|.	.|.	.|.	.|.	.|.	.|.	.|.	.|.
chr13:98912136-98912174	48|50	52|56	.|.	.|.	.|.	.|.	.|.	.|.	.|.	.|.	.|.	46|46	.|.	.|.	.|.	.|.	.|.	.|.	.|.	.|.	50|54	.|.	50|54	.|.	.|.	.|.	52|54	.|.	.|.	.|.	.|.	.|.	.|.	.|.	.|.	.|.	.|.	.|.	.|.	.|.	.|.	50|54	50|54	.|.	.|.	.|.	.|.	.|.	.|.
chr13:98989792-98989842	.|.	.|.	.|.	.|.	.|.	36|36	.|.	.|.	.|.	.|.	.|.	.|.	.|.	.|.	.|.	.|.	.|.	.|.	.|.	36|36	.|.	.|.	.|.	.|.	.|.	.|.	.|.	.|.	.|.	.|.	50|48	.|.	.|.	.|.	.|.	.|.	.|.	.|.	.|.	.|.	.|.	.|.	.|.	.|.	.|.	.|.	.|.	.|.	.|.
chr13:99144330-99144364	24|24	.|.	.|.	.|.	.|.	.|.	.|.	.|.	24|26	.|.	.|.	.|.	.|.	.|.	.|.	.|.	.|.	.|.	.|.	26|26	.|.	.|.	.|.	.|.	24|24	.|.	.|.	.|.	.|.	24|26	.|.	.|.	.|.	.|.	.|.	.|.	22|24	.|.	.|.	.|.	22|24	.|.	.|.	.|.	22|24	24|24	.|.	.|.	24|26
chr13:99306890-99306928	.|.	.|.	.|.	.|.	.|.	30|32	.|.	.|.	.|.	.|.	.|.	.|.	.|.	.|.	.|.	.|.	.|.	.|.	.|.	.|.	.|.	.|.	.|.	.|.	.|.	.|.	.|.	.|.	.|.	.|.	30|34	.|.	.|.	.|.	.|.	.|.	.|.	.|.	32|36	30|34	32|32	30|34	.|.	.|.	.|.	.|.	32|36	28|32	.|.
chr13:99607117-99607151	.|.	.|.	.|.	.|.	.|.	.|.	.|.	.|.	.|.	.|.	32|32	.|.	.|.	.|.	.|.	.|.	.|.	.|.	.|.	32|32	.|.	.|.	32|32	.|.	38|40	.|.	.|.	.|.	32|32	.|.	38|40	.|.	.|.	.|.	.|.	40|40	.|.	.|.	32|32	38|40	38|40	.|.	40|40	.|.	.|.	.|.	.|.	.|.	.|.
chr13:99740946-99740982	.|.	.|.	.|.	.|.	.|.	30|32	.|.	.|.	.|.	30|32	.|.	30|32	.|.	.|.	.|.	.|.	.|.	.|.	.|.	.|.	.|.	.|.	.|.	28|32	.|.	.|.	24|26	.|.	30|32	.|.	.|.	.|.	.|.	.|.	.|.	.|.	.|.	.|.	.|.	.|.	.|.	.|.	.|.	.|.	.|.	.|.	.|.	.|.	.|.
chr14:100458297-100458333	.|.	.|.	.|.	.|.	.|.	.|.	.|.	.|.	.|.	.|.	.|.	.|.	.|.	.|.	36|38	.|.	.|.	.|.	.|.	38|38	.|.	38|38	.|.	.|.	.|.	.|.	.|.	38|42	.|.	.|.	.|.	.|.	.|.	38|42	.|.	38|38	.|.	.|.	.|.	40|40	.|.	.|.	.|.	38|42	.|.	.|.	.|.	.|.	.|.
chr14:103303455-103303479	.|.	.|.	.|.	.|.	.|.	.|.	.|.	.|.	26|26	.|.	.|.	.|.	.|.	.|.	.|.	.|.	.|.	.|.	.|.	.|.	.|.	.|.	.|.	.|.	.|.	.|.	.|.	.|.	.|.	.|.	.|.	.|.	.|.	.|.	.|.	.|.	.|.	.|.	.|.	.|.	.|.	.|.	.|.	.|.	.|.	.|.	.|.	.|.	26|26
chr14:103869663-103869709	.|.	.|.	.|.	.|.	.|.	.|.	.|.	34|32	.|.	.|.	.|.	.|.	.|.	.|.	34|32	.|.	.|.	.|.	.|.	.|.	.|.	.|.	.|.	.|.	34|32	.|.	.|.	.|.	.|.	.|.	.|.	.|.	.|.	.|.	.|.	.|.	.|.	.|.	.|.	.|.	.|.	.|.	.|.	.|.	.|.	.|.	.|.	.|.	.|.
chr14:104390790-104390822	.|.	.|.	.|.	.|.	32|34	.|.	.|.	.|.	.|.	.|.	.|.	.|.	.|.	.|.	.|.	.|.	.|.	.|.	.|.	.|.	.|.	32|36	.|.	34|36	.|.	.|.	.|.	.|.	.|.	.|.	.|.	.|.	.|.	32|34	34|36	.|.	.|.	34|36	.|.	.|.	34|36	.|.	34|36	.|.	.|.	34|36	34|36	34|36	34|36
chr14:104491086-104491126	.|.	.|.	.|.	.|.	.|.	.|.	.|.	.|.	.|.	.|.	.|.	.|.	.|.	.|.	.|.	.|.	.|.	.|.	.|.	.|.	.|.	.|.	.|.	.|.	.|.	24|24	.|.	.|.	.|.	.|.	.|.	.|.	.|.	.|.	.|.	.|.	.|.	.|.	.|.	.|.	.|.	.|.	.|.	.|.	.|.	.|.	.|.	.|.	.|.
chr14:105548865-105548901	.|.	.|.	.|.	.|.	.|.	.|.	.|.	.|.	.|.	.|.	.|.	.|.	.|.	.|.	.|.	.|.	.|.	.|.	.|.	40|42	.|.	.|.	.|.	.|.	.|.	.|.	.|.	.|.	.|.	.|.	.|.	.|.	.|.	.|.	.|.	.|.	.|.	.|.	.|.	.|.	.|.	.|.	.|.	42|42	.|.	.|.	.|.	.|.	.|.
chr14:106470451-106470477	.|.	.|.	.|.	.|.	.|.	.|.	.|.	.|.	.|.	.|.	.|.	.|.	.|.	.|.	.|.	.|.	.|.	.|.	.|.	.|.	.|.	.|.	.|.	.|.	.|.	.|.	.|.	26|28	.|.	.|.	.|.	.|.	.|.	.|.	.|.	.|.	.|.	.|.	.|.	.|.	.|.	.|.	.|.	.|.	.|.	.|.	.|.	.|.	.|.
chr14:106567480-106567514	.|.	.|.	.|.	.|.	.|.	.|.	.|.	.|.	.|.	.|.	.|.	.|.	.|.	.|.	.|.	.|.	.|.	.|.	.|.	.|.	.|.	.|.	.|.	.|.	.|.	.|.	.|.	.|.	.|.	.|.	.|.	.|.	.|.	.|.	.|.	.|.	.|.	.|.	.|.	.|.	.|.	.|.	.|.	.|.	.|.	.|.	.|.	.|.	.|.
chr14:106646665-106646705	.|.	.|.	.|.	.|.	40|36	.|.	.|.	.|.	.|.	.|.	.|.	.|.	.|.	40|32	.|.	.|.	.|.	.|.	.|.	.|.	.|.	.|.	.|.	36|38	.|.	.|.	.|.	.|.	40|36	.|.	40|36	.|.	.|.	.|.	.|.	.|.	.|.	.|.	.|.	.|.	32|32	.|.	.|.	.|.	.|.	32|30	.|.	.|.	32|30
chr14:106978628-106978666	.|.	.|.	.|.	.|.	.|.	.|.	.|.	.|.	.|.	.|.	.|.	.|.	.|.	38|42	.|.	.|.	.|.	.|.	.|.	.|.	.|.	.|.	38|42	.|.	.|.	40|42	.|.	.|.	30|30	38|42	.|.	.|.	38|40	.|.	.|.	38|40	.|.	.|.	.|.	30|30	.|.	.|.	.|.	36|40	.|.	36|40	36|40	.|.	.|.
chr14:20828664-20828688	.|.	.|.	.|.	24|24	.|.	.|.	.|.	.|.	.|.	.|.	.|.	24|24	.|.	.|.	.|.	.|.	.|.	.|.	.|.	.|.	.|.	.|.	.|.	.|.	24|24	.|.	24|24	.|.	.|.	.|.	.|.	.|.	24|24	.|.	.|.	.|.	.|.	.|.	24|16	.|.	.|.	.|.	24|24	.|.	.|.	.|.	.|.	.|.	.|.
chr14:21746892-21746917	.|.	.|.	.|.	.|.	.|.	.|.	.|.	.|.	25|25	.|.	.|.	.|.	.|.	.|.	.|.	.|.	.|.	25|25	.|.	.|.	.|.	.|.	.|.	.|.	.|.	25|25	.|.	.|.	.|.	.|.	.|.	.|.	.|.	.|.	.|.	.|.	.|.	.|.	.|.	.|.	.|.	.|.	.|.	.|.	.|.	.|.	.|.	.|.	.|.
chr14:22549451-22549491	.|.	.|.	34|36	.|.	.|.	.|.	.|.	34|36	.|.	.|.	.|.	.|.	.|.	.|.	.|.	.|.	.|.	.|.	.|.	.|.	.|.	.|.	.|.	.|.	.|.	.|.	.|.	.|.	.|.	.|.	.|.	.|.	.|.	.|.	.|.	.|.	.|.	.|.	.|.	.|.	.|.	.|.	.|.	.|.	.|.	.|.	.|.	.|.	.|.
chr14:23069738-23069782	.|.	.|.	.|.	.|.	.|.	.|.	.|.	.|.	.|.	.|.	.|.	38|38	.|.	.|.	.|.	36|38	.|.	.|.	.|.	28|40	.|.	.|.	.|.	.|.	.|.	28|28	38|40	.|.	28|38	.|.	38|40	.|.	.|.	.|.	.|.	38|40	28|28	36|40	.|.	38|40	38|40	38|40	38|40	.|.	.|.	.|.	36|40	.|.	.|.
chr14:25701804-25701840	.|.	.|.	.|.	.|.	.|.	.|.	.|.	.|.	.|.	30|30	.|.	.|.	.|.	.|.	.|.	.|.	.|.	.|.	.|.	.|.	.|.	.|.	.|.	.|.	.|.	.|.	.|.	.|.	.|.	.|.	.|.	.|.	.|.	.|.	.|.	.|.	.|.	.|.	.|.	.|.	.|.	.|.	.|.	.|.	.|.	.|.	.|.	.|.	.|.
chr14:26085351-26085395	.|.	.|.	.|.	.|.	.|.	.|.	.|.	.|.	.|.	.|.	.|.	.|.	.|.	.|.	.|.	.|.	.|.	.|.	.|.	.|.	.|.	.|.	.|.	.|.	.|.	.|.	.|.	.|.	.|.	.|.	.|.	.|.	.|.	.|.	.|.	.|.	.|.	.|.	.|.	.|.	.|.	.|.	.|.	.|.	.|.	.|.	36|36	.|.	.|.
chr14:26635487-26635529	.|.	.|.	.|.	.|.	.|.	.|.	.|.	.|.	.|.	.|.	38|36	.|.	34|34	.|.	.|.	.|.	.|.	.|.	.|.	.|.	.|.	.|.	.|.	40|36	.|.	.|.	.|.	.|.	.|.	.|.	.|.	.|.	.|.	.|.	.|.	.|.	.|.	38|40	.|.	.|.	.|.	.|.	.|.	.|.	.|.	.|.	.|.	.|.	.|.
chr14:27053087-27053127	.|.	.|.	.|.	.|.	.|.	.|.	.|.	.|.	34|34	.|.	.|.	.|.	.|.	.|.	.|.	.|.	.|.	.|.	.|.	.|.	.|.	.|.	.|.	.|.	.|.	.|.	.|.	28|34	.|.	.|.	.|.	.|.	.|.	.|.	.|.	32|34	.|.	.|.	34|34	.|.	.|.	.|.	.|.	34|34	.|.	.|.	.|.	.|.	.|.
chr14:27685245-27685289	.|.	.|.	.|.	.|.	.|.	.|.	.|.	.|.	.|.	.|.	.|.	30|30	.|.	.|.	.|.	.|.	28|30	.|.	.|.	.|.	.|.	.|.	.|.	.|.	.|.	28|30	.|.	.|.	.|.	.|.	.|.	.|.	.|.	.|.	30|30	.|.	.|.	.|.	.|.	.|.	.|.	.|.	.|.	.|.	.|.	.|.	.|.	30|30	.|.
chr14:27903861-27903885	.|.	.|.	.|.	.|.	.|.	.|.	18|18	.|.	.|.	.|.	.|.	.|.	.|.	.|.	.|.	.|.	.|.	.|.	.|.	18|18	.|.	.|.	.|.	20|20	.|.	.|.	.|.	.|.	18|18	.|.	.|.	.|.	.|.	.|.	.|.	.|.	.|.	.|.	20|20	.|.	.|.	.|.	.|.	.|.	.|.	.|.	.|.	.|.	.|.
chr14:28775893-28775923	.|.	.|.	.|.	.|.	.|.	.|.	.|.	.|.	.|.	.|.	.|.	.|.	.|.	.|.	.|.	.|.	.|.	.|.	.|.	.|.	.|.	.|.	.|.	.|.	.|.	.|.	.|.	24|26	.|.	.|.	.|.	.|.	.|.	.|.	.|.	.|.	.|.	.|.	.|.	.|.	.|.	.|.	.|.	24|26	.|.	.|.	.|.	.|.	.|.
chr14:29518031-29518059	.|.	.|.	.|.	.|.	.|.	.|.	.|.	.|.	.|.	.|.	.|.	26|26	.|.	.|.	.|.	.|.	.|.	.|.	.|.	.|.	.|.	.|.	.|.	.|.	24|26	.|.	.|.	.|.	.|.	.|.	26|26	.|.	.|.	.|.	.|.	24|24	.|.	.|.	.|.	.|.	.|.	.|.	.|.	.|.	.|.	.|.	.|.	.|.	.|.
chr14:29563869-29563903	.|.	.|.	.|.	.|.	.|.	.|.	.|.	.|.	.|.	.|.	.|.	.|.	.|.	.|.	.|.	.|.	.|.	.|.	.|.	30|28	.|.	.|.	28|30	.|.	.|.	.|.	.|.	.|.	.|.	.|.	.|.	.|.	.|.	.|.	.|.	28|30	.|.	.|.	.|.	.|.	.|.	.|.	.|.	.|.	.|.	.|.	.|.	.|.	.|.
chr14:29683173-29683201	.|.	24|24	.|.	.|.	.|.	.|.	.|.	.|.	.|.	.|.	.|.	.|.	.|.	.|.	.|.	.|.	.|.	22|24	24|24	.|.	24|24	.|.	.|.	.|.	22|24	.|.	.|.	.|.	.|.	.|.	.|.	.|.	22|24	.|.	.|.	.|.	.|.	22|24	.|.	.|.	.|.	22|24	.|.	.|.	24|24	.|.	.|.	.|.	.|.
chr14:29852060-29852084	.|.	18|18	.|.	.|.	18|18	.|.	.|.	.|.	.|.	.|.	18|18	24|20	.|.	.|.	18|18	20|22	.|.	.|.	.|.	22|22	.|.	.|.	.|.	.|.	.|.	18|22	.|.	18|18	.|.	.|.	.|.	.|.	22|22	18|18	.|.	18|22	18|18	22|22	20|22	18|22	22|22	.|.	.|.	22|22	20|22	.|.	.|.	.|.	.|.
chr14:29988637-29988665	.|.	.|.	.|.	.|.	.|.	.|.	.|.	.|.	.|.	.|.	.|.	.|.	.|.	28|28	.|.	.|.	.|.	.|.	.|.	.|.	.|.	.|.	.|.	.|.	.|.	.|.	.|.	.|.	.|.	.|.	.|.	.|.	.|.	.|.	.|.	28|28	.|.	.|.	.|.	.|.	.|.	.|.	.|.	.|.	.|.	.|.	.|.	.|.	.|.
chr14:30011470-30011512	44|46	.|.	.|.	.|.	.|.	.|.	.|.	.|.	.|.	.|.	.|.	.|.	.|.	.|.	.|.	.|.	.|.	.|.	.|.	.|.	.|.	.|.	.|.	.|.	.|.	.|.	.|.	.|.	44|48	.|.	44|48	.|.	.|.	.|.	.|.	.|.	.|.	.|.	.|.	.|.	.|.	.|.	.|.	.|.	.|.	.|.	.|.	.|.	.|.
chr14:30078712-30078744	34|36	32|32	.|.	.|.	.|.	.|.	.|.	.|.	.|.	.|.	.|.	.|.	.|.	.|.	.|.	.|.	.|.	.|.	.|.	32|38	36|40	34|34	32|34	.|.	.|.	.|.	.|.	.|.	.|.	.|.	38|40	.|.	.|.	.|.	.|.	.|.	.|.	.|.	.|.	.|.	32|38	36|40	.|.	.|.	30|34	36|40	.|.	.|.	.|.
chr14:30756751-30756777	.|.	26|26	.|.	.|.	26|26	.|.	.|.	26|26	26|24	.|.	.|.	.|.	.|.	.|.	.|.	.|.	.|.	.|.	.|.	.|.	.|.	26|26	.|.	.|.	26|26	.|.	.|.	.|.	26|26	26|26	.|.	.|.	.|.	26|26	.|.	26|26	.|.	.|.	26|26	.|.	26|26	.|.	.|.	.|.	.|.	26|26	.|.	26|26	26|26
chr14:30803551-30803581	.|.	.|.	.|.	26|26	24|26	.|.	.|.	.|.	.|.	.|.	24|28	.|.	.|.	.|.	.|.	.|.	.|.	.|.	.|.	.|.	.|.	.|.	28|26	.|.	.|.	.|.	.|.	.|.	.|.	.|.	.|.	.|.	.|.	.|.	.|.	26|26	24|26	.|.	28|26	.|.	.|.	.|.	.|.	26|26	24|26	.|.	.|.	28|26	.|.
chr14:30926936-30926978	.|.	36|38	.|.	.|.	.|.	.|.	42|38	.|.	.|.	42|44	.|.	.|.	.|.	34|38	.|.	42|40	.|.	.|.	.|.	.|.	40|44	36|36	.|.	.|.	.|.	.|.	44|44	.|.	36|38	.|.	.|.	.|.	36|38	.|.	.|.	.|.	.|.	36|38	.|.	.|.	36|44	42|44	36|38	40|44	38|44	.|.	36|38	36|38	42|38
chr14:30981900-30981924	24|24	.|.	.|.	.|.	.|.	.|.	.|.	.|.	.|.	.|.	.|.	.|.	24|24	.|.	.|.	.|.	.|.	.|.	.|.	.|.	.|.	.|.	.|.	.|.	.|.	.|.	.|.	.|.	.|.	.|.	24|24	.|.	.|.	.|.	.|.	.|.	.|.	.|.	.|.	.|.	.|.	.|.	24|24	.|.	.|.	.|.	.|.	.|.	.|.
chr14:31828493-31828531	.|.	.|.	.|.	.|.	.|.	38|42	.|.	.|.	38|42	36|42	.|.	.|.	.|.	.|.	.|.	.|.	.|.	.|.	38|42	.|.	.|.	.|.	.|.	.|.	.|.	40|42	.|.	.|.	.|.	.|.	.|.	38|40	.|.	.|.	.|.	.|.	.|.	.|.	.|.	.|.	38|42	.|.	.|.	.|.	38|42	.|.	40|44	.|.	.|.
chr14:32038395-32038419	24|24	23|23	23|23	.|.	24|23	24|23	24|23	23|23	23|23	.|.	.|.	23|23	23|23	23|23	.|.	.|.	.|.	23|23	.|.	24|23	23|23	.|.	24|23	24|24	24|23	24|23	24|23	24|23	24|23	.|.	24|24	.|.	24|23	24|23	.|.	24|23	24|23	23|23	24|23	24|23	24|23	24|23	24|23	24|23	24|23	24|23	24|23	24|23	.|.
chr14:32211443-32211485	.|.	.|.	.|.	.|.	.|.	.|.	38|40	.|.	.|.	.|.	.|.	.|.	40|40	.|.	.|.	42|40	.|.	.|.	.|.	.|.	.|.	.|.	.|.	.|.	.|.	.|.	.|.	.|.	.|.	.|.	.|.	.|.	.|.	.|.	.|.	.|.	.|.	.|.	.|.	36|38	.|.	.|.	.|.	.|.	42|40	.|.	.|.	.|.	.|.
chr14:33192765-33192797	28|28	.|.	.|.	.|.	26|28	.|.	.|.	.|.	28|28	.|.	.|.	26|26	.|.	.|.	.|.	.|.	24|26	.|.	.|.	.|.	.|.	24|26	26|26	26|26	.|.	.|.	.|.	.|.	.|.	.|.	.|.	26|26	.|.	.|.	.|.	.|.	.|.	.|.	24|26	26|26	.|.	.|.	.|.	26|26	.|.	.|.	.|.	.|.	26|26
chr14:33779996-33780040	.|.	.|.	.|.	.|.	.|.	.|.	28|28	.|.	.|.	.|.	.|.	.|.	.|.	.|.	.|.	.|.	.|.	.|.	28|42	28|28	.|.	.|.	.|.	.|.	.|.	.|.	.|.	.|.	.|.	.|.	28|28	.|.	.|.	.|.	.|.	.|.	.|.	.|.	.|.	.|.	.|.	.|.	44|40	.|.	.|.	40|38	.|.	.|.	.|.
chr14:33968141-33968195	.|.	.|.	.|.	30|28	.|.	.|.	.|.	26|28	.|.	.|.	.|.	.|.	.|.	.|.	.|.	.|.	.|.	.|.	.|.	.|.	.|.	.|.	.|.	.|.	.|.	.|.	.|.	.|.	30|28	.|.	24|30	.|.	.|.	.|.	.|.	.|.	.|.	.|.	.|.	.|.	.|.	.|.	.|.	.|.	.|.	.|.	.|.	.|.	.|.
chr14:36288362-36288390	.|.	.|.	.|.	.|.	.|.	.|.	.|.	.|.	.|.	.|.	.|.	.|.	.|.	.|.	.|.	.|.	.|.	.|.	.|.	.|.	.|.	.|.	.|.	.|.	.|.	.|.	.|.	.|.	.|.	.|.	.|.	.|.	.|.	.|.	.|.	.|.	.|.	.|.	.|.	.|.	.|.	.|.	.|.	.|.	.|.	.|.	.|.	.|.	.|.
chr14:36833451-36833475	.|.	.|.	.|.	.|.	.|.	.|.	.|.	.|.	.|.	.|.	.|.	.|.	.|.	.|.	.|.	.|.	24|24	.|.	.|.	.|.	.|.	.|.	24|24	.|.	.|.	24|24	.|.	.|.	.|.	.|.	.|.	.|.	.|.	.|.	.|.	.|.	.|.	.|.	.|.	.|.	.|.	.|.	.|.	.|.	.|.	24|24	.|.	.|.	.|.
chr14:36890971-36891003	.|.	.|.	.|.	.|.	.|.	.|.	.|.	.|.	.|.	.|.	.|.	.|.	.|.	.|.	.|.	.|.	.|.	.|.	.|.	.|.	.|.	.|.	.|.	.|.	.|.	.|.	.|.	.|.	.|.	.|.	.|.	30|30	.|.	.|.	.|.	.|.	.|.	.|.	.|.	.|.	.|.	.|.	.|.	.|.	.|.	.|.	.|.	.|.	.|.
chr14:37336995-37337027	.|.	.|.	30|32	.|.	.|.	.|.	.|.	.|.	.|.	.|.	.|.	.|.	.|.	.|.	.|.	.|.	.|.	.|.	.|.	.|.	.|.	.|.	.|.	.|.	.|.	.|.	.|.	26|26	.|.	.|.	.|.	.|.	26|26	.|.	.|.	.|.	.|.	.|.	.|.	.|.	.|.	.|.	.|.	30|32	30|32	.|.	.|.	.|.	.|.
chr14:38163184-38163220	.|.	.|.	.|.	.|.	.|.	.|.	.|.	.|.	.|.	.|.	.|.	.|.	.|.	.|.	.|.	.|.	.|.	.|.	.|.	.|.	.|.	.|.	32|32	.|.	.|.	.|.	.|.	.|.	.|.	.|.	32|32	.|.	.|.	.|.	.|.	.|.	.|.	.|.	32|32	.|.	.|.	.|.	.|.	.|.	.|.	.|.	.|.	32|32	.|.
chr14:38261981-38262023	.|.	.|.	34|34	.|.	.|.	32|32	.|.	.|.	.|.	.|.	.|.	.|.	.|.	.|.	.|.	.|.	.|.	.|.	.|.	.|.	.|.	.|.	.|.	30|30	.|.	.|.	.|.	.|.	.|.	.|.	30|30	.|.	.|.	.|.	.|.	32|34	.|.	.|.	.|.	.|.	.|.	.|.	.|.	.|.	.|.	.|.	.|.	.|.	.|.
chr14:38318120-38318172	.|.	.|.	.|.	.|.	.|.	.|.	.|.	.|.	.|.	.|.	.|.	.|.	.|.	40|42	.|.	.|.	.|.	.|.	.|.	40|40	.|.	.|.	.|.	.|.	.|.	.|.	.|.	.|.	.|.	.|.	.|.	.|.	.|.	.|.	.|.	.|.	.|.	.|.	.|.	.|.	.|.	.|.	.|.	.|.	.|.	.|.	.|.	.|.	.|.
chr14:38601743-38601771	.|.	.|.	.|.	.|.	.|.	.|.	.|.	.|.	.|.	.|.	.|.	.|.	.|.	.|.	.|.	.|.	.|.	.|.	.|.	.|.	.|.	.|.	.|.	.|.	.|.	.|.	.|.	.|.	.|.	.|.	.|.	.|.	.|.	.|.	.|.	.|.	.|.	.|.	.|.	.|.	.|.	.|.	.|.	.|.	.|.	.|.	.|.	.|.	.|.
chr14:38682319-38682353	.|.	30|30	.|.	.|.	.|.	.|.	28|30	.|.	.|.	.|.	.|.	.|.	.|.	.|.	.|.	.|.	.|.	28|30	.|.	.|.	.|.	.|.	.|.	.|.	26|28	26|28	.|.	.|.	.|.	.|.	.|.	.|.	26|28	.|.	.|.	.|.	.|.	.|.	.|.	.|.	.|.	.|.	.|.	.|.	.|.	.|.	.|.	.|.	.|.
chr14:38920364-38920396	.|.	.|.	.|.	.|.	.|.	.|.	.|.	.|.	38|40	.|.	.|.	.|.	38|40	.|.	.|.	.|.	.|.	.|.	.|.	.|.	.|.	.|.	.|.	.|.	.|.	42|44	.|.	.|.	.|.	.|.	.|.	38|38	40|42	.|.	.|.	.|.	.|.	38|40	.|.	.|.	38|40	.|.	.|.	.|.	.|.	.|.	.|.	.|.	.|.
chr14:39111903-39111933	.|.	28|28	.|.	.|.	.|.	24|28	24|24	.|.	26|28	.|.	26|26	.|.	.|.	24|24	24|24	.|.	.|.	.|.	.|.	24|28	.|.	28|28	.|.	.|.	24|24	.|.	.|.	.|.	24|24	.|.	26|28	.|.	24|28	.|.	.|.	24|24	24|24	.|.	24|24	.|.	24|24	24|24	26|26	.|.	24|28	24|28	.|.	.|.	.|.
chr14:39784014-39784040	.|.	.|.	.|.	.|.	.|.	.|.	.|.	.|.	.|.	.|.	.|.	.|.	.|.	.|.	.|.	.|.	.|.	.|.	.|.	.|.	.|.	.|.	.|.	.|.	.|.	.|.	.|.	.|.	.|.	.|.	.|.	.|.	.|.	.|.	.|.	.|.	.|.	.|.	38|40	.|.	.|.	.|.	.|.	.|.	.|.	.|.	.|.	.|.	.|.
chr14:40177861-40177887	.|.	.|.	.|.	.|.	28|28	.|.	.|.	.|.	.|.	30|30	.|.	.|.	28|28	.|.	.|.	.|.	.|.	.|.	.|.	.|.	.|.	26|28	.|.	.|.	.|.	.|.	.|.	.|.	.|.	.|.	30|30	28|28	.|.	.|.	.|.	.|.	.|.	.|.	.|.	.|.	.|.	.|.	28|28	.|.	.|.	.|.	.|.	.|.	.|.
chr14:40374751-40374777	.|.	30|30	.|.	.|.	28|30	30|30	30|30	.|.	28|28	28|30	28|28	.|.	.|.	.|.	30|30	.|.	.|.	28|28	.|.	28|30	30|30	26|28	28|28	28|28	.|.	28|30	30|30	28|28	28|28	28|28	28|28	.|.	28|30	.|.	30|30	28|30	.|.	30|30	.|.	28|28	28|30	28|30	.|.	28|30	.|.	26|28	.|.	30|30	.|.
chr14:41264459-41264495	.|.	.|.	.|.	.|.	.|.	.|.	.|.	36|38	.|.	.|.	.|.	.|.	.|.	.|.	.|.	36|34	.|.	.|.	.|.	36|38	36|38	.|.	.|.	.|.	36|38	36|38	36|38	34|34	.|.	.|.	36|38	.|.	.|.	36|38	.|.	36|38	36|36	36|34	.|.	.|.	.|.	.|.	36|34	.|.	.|.	36|34	.|.	.|.	.|.
chr14:41659958-41660002	.|.	.|.	.|.	.|.	.|.	.|.	.|.	.|.	.|.	.|.	.|.	.|.	.|.	.|.	.|.	.|.	.|.	.|.	.|.	.|.	.|.	.|.	.|.	.|.	.|.	.|.	.|.	.|.	.|.	.|.	.|.	.|.	.|.	.|.	30|32	.|.	.|.	.|.	.|.	.|.	.|.	.|.	.|.	.|.	.|.	.|.	.|.	.|.	.|.
chr14:41931017-41931041	.|.	.|.	.|.	.|.	.|.	.|.	.|.	.|.	.|.	.|.	.|.	.|.	.|.	.|.	.|.	.|.	.|.	.|.	.|.	.|.	.|.	.|.	.|.	.|.	.|.	.|.	.|.	.|.	.|.	.|.	.|.	.|.	.|.	.|.	.|.	.|.	.|.	.|.	.|.	.|.	.|.	.|.	.|.	.|.	16|16	.|.	.|.	.|.	.|.
chr14:42370635-42370669	.|.	.|.	.|.	.|.	.|.	.|.	.|.	.|.	.|.	.|.	.|.	.|.	.|.	.|.	.|.	.|.	.|.	.|.	.|.	.|.	.|.	.|.	.|.	.|.	.|.	.|.	.|.	.|.	28|28	.|.	.|.	.|.	.|.	.|.	.|.	.|.	.|.	.|.	.|.	.|.	.|.	.|.	.|.	.|.	.|.	.|.	34|32	.|.	.|.
chr14:42540114-42540170	.|.	.|.	.|.	.|.	.|.	.|.	.|.	.|.	.|.	.|.	.|.	.|.	.|.	.|.	.|.	.|.	.|.	.|.	.|.	.|.	.|.	.|.	.|.	.|.	.|.	.|.	.|.	.|.	.|.	.|.	.|.	.|.	.|.	.|.	.|.	.|.	.|.	.|.	.|.	.|.	.|.	.|.	.|.	.|.	.|.	.|.	28|32	.|.	.|.
chr14:43208128-43208152	20|20	.|.	.|.	.|.	.|.	.|.	20|20	.|.	.|.	24|24	.|.	.|.	.|.	.|.	.|.	.|.	.|.	.|.	.|.	20|20	20|20	.|.	20|20	.|.	.|.	.|.	.|.	.|.	.|.	.|.	24|24	.|.	.|.	.|.	.|.	20|20	20|20	.|.	.|.	.|.	20|20	.|.	.|.	.|.	20|20	24|24	.|.	.|.	24|24
chr14:43371113-43371149	.|.	.|.	.|.	.|.	.|.	.|.	.|.	.|.	.|.	.|.	.|.	44|44	.|.	.|.	.|.	.|.	.|.	.|.	42|42	.|.	.|.	.|.	.|.	.|.	.|.	.|.	.|.	.|.	.|.	.|.	.|.	.|.	.|.	.|.	.|.	.|.	.|.	.|.	.|.	.|.	.|.	.|.	.|.	.|.	.|.	.|.	40|42	.|.	.|.
chr14:43423052-43423076	.|.	.|.	.|.	.|.	28|28	.|.	.|.	28|28	.|.	28|28	.|.	28|28	28|28	.|.	.|.	.|.	20|20	.|.	.|.	.|.	.|.	.|.	.|.	.|.	.|.	.|.	20|20	.|.	.|.	.|.	20|28	.|.	28|28	.|.	.|.	.|.	28|28	.|.	.|.	20|28	.|.	28|28	.|.	.|.	.|.	.|.	.|.	20|28	.|.
chr14:43630610-43630650	.|.	.|.	34|34	.|.	34|34	.|.	.|.	.|.	.|.	.|.	.|.	.|.	.|.	.|.	.|.	36|36	.|.	.|.	.|.	.|.	32|34	.|.	.|.	.|.	34|34	.|.	.|.	.|.	.|.	.|.	.|.	.|.	.|.	.|.	.|.	.|.	.|.	.|.	.|.	.|.	32|34	.|.	32|34	.|.	.|.	32|34	.|.	.|.	.|.
chr14:43847960-43847996	30|32	.|.	.|.	.|.	.|.	.|.	.|.	.|.	.|.	.|.	.|.	.|.	.|.	.|.	.|.	.|.	.|.	.|.	.|.	32|32	.|.	.|.	.|.	.|.	32|32	.|.	.|.	.|.	.|.	.|.	.|.	.|.	.|.	.|.	.|.	.|.	.|.	.|.	.|.	.|.	.|.	.|.	.|.	.|.	.|.	.|.	.|.	.|.	.|.
chr14:43907746-43907784	32|32	.|.	.|.	.|.	.|.	.|.	.|.	.|.	.|.	.|.	.|.	.|.	.|.	.|.	.|.	.|.	.|.	.|.	.|.	.|.	.|.	.|.	.|.	32|32	.|.	.|.	.|.	.|.	.|.	.|.	.|.	.|.	.|.	.|.	.|.	.|.	.|.	.|.	.|.	.|.	.|.	.|.	.|.	.|.	.|.	.|.	.|.	.|.	.|.
chr14:44089109-44089133	.|.	.|.	.|.	.|.	.|.	.|.	.|.	.|.	.|.	.|.	.|.	.|.	.|.	.|.	.|.	.|.	.|.	.|.	.|.	.|.	.|.	.|.	.|.	24|24	.|.	.|.	.|.	24|24	.|.	.|.	.|.	.|.	24|24	.|.	.|.	24|24	24|23	24|24	.|.	.|.	24|24	24|24	.|.	.|.	.|.	.|.	.|.	.|.	.|.
chr14:44467654-44467694	.|.	.|.	.|.	.|.	.|.	.|.	.|.	.|.	.|.	.|.	.|.	.|.	.|.	.|.	.|.	.|.	.|.	.|.	.|.	.|.	.|.	.|.	30|30	.|.	.|.	.|.	.|.	.|.	.|.	.|.	.|.	.|.	.|.	.|.	.|.	.|.	.|.	.|.	.|.	.|.	.|.	.|.	.|.	.|.	.|.	.|.	.|.	.|.	26|28
chr14:44660391-44660433	.|.	.|.	.|.	.|.	.|.	.|.	.|.	.|.	38|40	.|.	.|.	.|.	36|38	.|.	.|.	.|.	.|.	.|.	.|.	.|.	.|.	.|.	.|.	.|.	.|.	.|.	.|.	.|.	.|.	.|.	.|.	.|.	.|.	.|.	.|.	.|.	.|.	.|.	.|.	.|.	40|40	.|.	.|.	.|.	.|.	.|.	.|.	.|.	.|.
chr14:44763052-44763094	.|.	.|.	.|.	.|.	.|.	.|.	.|.	42|44	46|48	.|.	.|.	.|.	.|.	.|.	.|.	.|.	.|.	.|.	.|.	48|48	.|.	.|.	50|50	.|.	.|.	.|.	.|.	.|.	.|.	.|.	.|.	.|.	.|.	.|.	.|.	.|.	.|.	50|52	.|.	44|40	.|.	.|.	.|.	.|.	.|.	.|.	54|52	.|.	.|.
chr14:44884170-44884194	.|.	.|.	.|.	.|.	.|.	.|.	.|.	.|.	.|.	.|.	.|.	24|24	.|.	.|.	.|.	.|.	.|.	.|.	.|.	.|.	.|.	24|24	24|24	.|.	24|24	.|.	.|.	24|24	.|.	.|.	.|.	.|.	.|.	.|.	.|.	.|.	24|24	.|.	.|.	.|.	.|.	.|.	.|.	.|.	.|.	.|.	.|.	24|24	.|.
chr14:44936744-44936784	.|.	.|.	.|.	.|.	.|.	40|40	.|.	.|.	.|.	.|.	.|.	.|.	.|.	.|.	.|.	.|.	.|.	.|.	.|.	.|.	.|.	.|.	.|.	.|.	.|.	.|.	.|.	.|.	.|.	.|.	.|.	.|.	.|.	.|.	.|.	.|.	.|.	.|.	.|.	.|.	.|.	.|.	.|.	.|.	.|.	.|.	.|.	.|.	.|.
chr14:44951316-44951360	.|.	.|.	.|.	.|.	.|.	.|.	32|36	.|.	.|.	.|.	.|.	.|.	.|.	.|.	.|.	.|.	.|.	.|.	.|.	.|.	.|.	.|.	32|34	.|.	.|.	.|.	.|.	.|.	32|34	.|.	.|.	.|.	.|.	32|34	.|.	.|.	32|34	.|.	.|.	.|.	30|34	.|.	.|.	.|.	.|.	.|.	.|.	.|.	.|.
chr14:45480988-45481014	.|.	26|28	.|.	.|.	.|.	.|.	.|.	.|.	.|.	.|.	.|.	.|.	.|.	20|22	.|.	.|.	.|.	.|.	.|.	.|.	.|.	.|.	.|.	.|.	20|22	.|.	.|.	.|.	.|.	.|.	.|.	.|.	.|.	.|.	.|.	.|.	28|30	.|.	.|.	.|.	.|.	.|.	.|.	.|.	.|.	.|.	.|.	20|22	.|.
chr14:45486609-45486637	.|.	.|.	.|.	28|26	.|.	.|.	.|.	.|.	28|26	28|26	.|.	.|.	28|26	.|.	28|26	.|.	.|.	28|26	.|.	.|.	28|26	.|.	28|26	24|30	28|26	28|26	.|.	28|26	.|.	28|26	.|.	.|.	28|28	26|26	.|.	28|26	.|.	.|.	.|.	28|28	28|26	28|26	.|.	.|.	28|26	.|.	28|26	.|.	.|.
chr14:46013301-46013328	.|.	.|.	.|.	.|.	.|.	.|.	.|.	.|.	.|.	.|.	.|.	.|.	.|.	.|.	.|.	.|.	.|.	.|.	.|.	.|.	.|.	.|.	.|.	.|.	.|.	27|27	.|.	27|27	.|.	.|.	.|.	.|.	.|.	.|.	.|.	.|.	.|.	.|.	.|.	.|.	.|.	.|.	.|.	.|.	.|.	.|.	.|.	.|.	.|.
chr14:46478928-46478952	.|.	.|.	.|.	.|.	.|.	.|.	.|.	.|.	.|.	.|.	.|.	.|.	.|.	.|.	.|.	.|.	.|.	.|.	.|.	.|.	.|.	.|.	16|18	.|.	.|.	.|.	.|.	.|.	.|.	.|.	.|.	.|.	.|.	.|.	.|.	.|.	.|.	.|.	.|.	.|.	.|.	.|.	.|.	.|.	.|.	.|.	.|.	.|.	.|.
chr14:46642023-46642048	.|.	.|.	.|.	.|.	.|.	.|.	.|.	.|.	.|.	.|.	.|.	.|.	.|.	.|.	.|.	.|.	.|.	25|25	.|.	.|.	.|.	.|.	.|.	.|.	25|25	.|.	.|.	.|.	.|.	.|.	25|25	25|25	.|.	.|.	.|.	.|.	.|.	.|.	.|.	.|.	.|.	.|.	.|.	.|.	.|.	.|.	.|.	.|.	.|.
chr14:46839444-46839468	.|.	.|.	.|.	.|.	.|.	.|.	.|.	.|.	.|.	.|.	.|.	.|.	.|.	.|.	.|.	.|.	.|.	.|.	.|.	24|24	.|.	.|.	.|.	24|24	.|.	.|.	.|.	.|.	.|.	.|.	.|.	.|.	.|.	.|.	24|24	.|.	.|.	.|.	.|.	.|.	.|.	.|.	.|.	.|.	.|.	.|.	.|.	.|.	.|.
chr14:46919353-46919381	.|.	.|.	.|.	.|.	.|.	.|.	.|.	.|.	.|.	.|.	.|.	.|.	.|.	.|.	.|.	.|.	.|.	.|.	48|48	40|40	48|48	40|40	.|.	.|.	.|.	.|.	.|.	.|.	.|.	.|.	.|.	.|.	.|.	.|.	.|.	.|.	.|.	.|.	.|.	.|.	.|.	48|48	.|.	.|.	40|40	.|.	.|.	.|.	.|.
chr14:47086453-47086489	.|.	.|.	.|.	.|.	.|.	.|.	.|.	.|.	30|30	.|.	.|.	.|.	.|.	.|.	.|.	.|.	.|.	.|.	.|.	.|.	.|.	.|.	.|.	.|.	.|.	.|.	.|.	.|.	.|.	.|.	.|.	.|.	.|.	.|.	.|.	.|.	.|.	.|.	.|.	.|.	.|.	.|.	.|.	.|.	.|.	.|.	26|28	.|.	.|.
chr14:47193736-47193772	36|34	.|.	24|28	.|.	.|.	.|.	.|.	36|34	.|.	.|.	.|.	.|.	.|.	.|.	.|.	.|.	.|.	.|.	.|.	36|34	.|.	.|.	.|.	.|.	.|.	.|.	.|.	.|.	.|.	.|.	.|.	.|.	.|.	.|.	.|.	.|.	.|.	.|.	.|.	.|.	.|.	.|.	36|34	.|.	.|.	36|34	.|.	.|.	.|.
chr14:47627566-47627602	.|.	.|.	.|.	.|.	.|.	.|.	.|.	.|.	.|.	.|.	.|.	.|.	.|.	.|.	.|.	.|.	.|.	.|.	.|.	.|.	.|.	.|.	.|.	.|.	.|.	.|.	32|34	.|.	.|.	.|.	.|.	.|.	.|.	.|.	.|.	.|.	.|.	.|.	.|.	.|.	.|.	.|.	.|.	.|.	.|.	.|.	.|.	.|.	.|.
chr14:48142835-48142873	.|.	.|.	.|.	.|.	38|38	38|38	.|.	38|34	.|.	.|.	.|.	.|.	.|.	.|.	.|.	.|.	.|.	.|.	.|.	38|38	38|36	.|.	.|.	.|.	.|.	38|36	.|.	.|.	.|.	.|.	34|36	.|.	38|36	.|.	.|.	32|36	.|.	.|.	38|38	.|.	.|.	.|.	.|.	36|36	.|.	.|.	.|.	.|.	.|.
chr14:48549491-48549535	.|.	.|.	.|.	.|.	.|.	.|.	.|.	36|36	.|.	.|.	.|.	.|.	.|.	.|.	.|.	.|.	.|.	.|.	.|.	.|.	.|.	.|.	.|.	.|.	.|.	36|36	.|.	36|36	.|.	.|.	.|.	.|.	.|.	.|.	.|.	.|.	.|.	.|.	.|.	.|.	.|.	.|.	.|.	.|.	.|.	.|.	.|.	.|.	.|.
chr14:48653106-48653142	24|24	.|.	.|.	.|.	26|24	.|.	.|.	.|.	26|24	.|.	.|.	.|.	26|26	.|.	32|34	32|34	.|.	26|24	.|.	36|34	36|34	26|26	.|.	.|.	.|.	.|.	.|.	26|24	26|26	.|.	36|34	.|.	36|26	.|.	26|24	.|.	.|.	.|.	36|34	26|26	32|34	.|.	.|.	.|.	.|.	.|.	.|.	.|.	.|.
chr14:49863321-49863355	.|.	28|28	28|30	.|.	.|.	.|.	.|.	.|.	.|.	.|.	.|.	.|.	.|.	.|.	.|.	.|.	.|.	.|.	30|30	30|30	.|.	.|.	.|.	.|.	.|.	.|.	.|.	.|.	.|.	.|.	.|.	.|.	.|.	.|.	.|.	.|.	.|.	.|.	.|.	.|.	28|28	.|.	.|.	.|.	.|.	.|.	.|.	28|28	.|.
chr14:50122176-50122208	.|.	28|28	.|.	.|.	26|28	.|.	.|.	.|.	.|.	.|.	28|28	.|.	34|36	.|.	.|.	.|.	.|.	.|.	.|.	.|.	.|.	.|.	.|.	36|36	.|.	.|.	.|.	.|.	.|.	.|.	.|.	.|.	.|.	.|.	.|.	.|.	.|.	.|.	.|.	.|.	.|.	.|.	.|.	.|.	.|.	.|.	.|.	.|.	.|.
chr14:50963533-50963563	.|.	.|.	.|.	.|.	.|.	.|.	.|.	.|.	.|.	.|.	.|.	.|.	.|.	.|.	.|.	.|.	.|.	.|.	.|.	.|.	.|.	.|.	.|.	.|.	.|.	.|.	.|.	.|.	.|.	30|30	30|30	.|.	.|.	30|30	.|.	.|.	.|.	.|.	.|.	30|30	.|.	30|30	.|.	.|.	.|.	.|.	30|30	.|.	.|.
chr14:51062236-51062260	.|.	.|.	.|.	.|.	.|.	16|16	.|.	.|.	.|.	.|.	.|.	.|.	.|.	.|.	.|.	.|.	22|22	.|.	.|.	.|.	.|.	.|.	.|.	16|16	.|.	22|22	.|.	.|.	.|.	.|.	.|.	.|.	.|.	16|16	.|.	.|.	.|.	.|.	16|22	22|22	.|.	.|.	.|.	.|.	.|.	.|.	.|.	.|.	.|.
chr14:51234770-51234816	.|.	.|.	.|.	.|.	.|.	.|.	.|.	.|.	.|.	.|.	.|.	.|.	.|.	.|.	.|.	.|.	.|.	.|.	.|.	.|.	38|34	.|.	.|.	.|.	.|.	.|.	.|.	.|.	38|38	.|.	.|.	.|.	.|.	.|.	.|.	.|.	.|.	.|.	.|.	.|.	.|.	.|.	.|.	.|.	.|.	.|.	.|.	.|.	.|.
chr14:52494351-52494385	.|.	.|.	.|.	.|.	28|28	.|.	.|.	.|.	.|.	.|.	.|.	.|.	.|.	.|.	.|.	.|.	.|.	.|.	.|.	.|.	.|.	.|.	.|.	28|28	.|.	.|.	.|.	24|24	.|.	.|.	24|24	.|.	.|.	28|28	.|.	.|.	.|.	.|.	.|.	.|.	.|.	.|.	.|.	.|.	.|.	.|.	.|.	.|.	.|.
chr14:52778615-52778651	.|.	30|32	.|.	.|.	30|32	.|.	36|38	.|.	.|.	.|.	.|.	.|.	.|.	.|.	.|.	.|.	30|32	.|.	.|.	.|.	.|.	.|.	36|38	28|32	36|38	.|.	36|38	.|.	30|32	.|.	36|38	.|.	32|40	.|.	.|.	32|40	30|32	32|32	30|32	.|.	30|32	36|38	.|.	.|.	.|.	30|32	30|32	30|32	.|.
chr14:52820900-52820926	.|.	.|.	.|.	.|.	.|.	.|.	.|.	.|.	.|.	.|.	.|.	.|.	.|.	.|.	.|.	.|.	.|.	.|.	.|.	.|.	.|.	.|.	.|.	.|.	.|.	.|.	.|.	.|.	.|.	.|.	.|.	.|.	.|.	.|.	.|.	.|.	.|.	.|.	.|.	.|.	.|.	.|.	.|.	.|.	.|.	.|.	.|.	.|.	.|.
chr14:52982387-52982427	.|.	.|.	.|.	.|.	.|.	.|.	.|.	.|.	.|.	.|.	.|.	.|.	.|.	.|.	.|.	.|.	.|.	.|.	.|.	.|.	.|.	.|.	.|.	.|.	.|.	.|.	.|.	.|.	.|.	.|.	.|.	.|.	.|.	.|.	.|.	.|.	.|.	.|.	28|26	.|.	.|.	.|.	.|.	.|.	.|.	.|.	.|.	.|.	.|.
chr14:53957821-53957867	.|.	.|.	.|.	50|52	.|.	.|.	.|.	.|.	.|.	.|.	.|.	.|.	.|.	.|.	.|.	.|.	.|.	.|.	.|.	46|44	.|.	.|.	46|42	.|.	.|.	.|.	.|.	.|.	.|.	.|.	.|.	.|.	.|.	.|.	.|.	.|.	.|.	.|.	.|.	.|.	.|.	.|.	.|.	.|.	.|.	.|.	.|.	.|.	.|.
chr14:55069041-55069093	.|.	.|.	.|.	.|.	.|.	.|.	.|.	.|.	.|.	.|.	.|.	.|.	34|36	.|.	.|.	.|.	.|.	.|.	.|.	.|.	62|68	.|.	36|38	.|.	.|.	.|.	36|66	.|.	40|66	.|.	.|.	36|38	.|.	.|.	.|.	36|38	.|.	.|.	.|.	48|68	68|38	.|.	68|38	.|.	.|.	.|.	68|36	.|.	.|.
chr14:55262688-55262740	.|.	.|.	.|.	.|.	.|.	.|.	.|.	.|.	.|.	.|.	.|.	.|.	.|.	.|.	.|.	.|.	.|.	.|.	.|.	.|.	.|.	32|34	.|.	.|.	32|34	.|.	38|36	.|.	.|.	.|.	.|.	.|.	.|.	.|.	.|.	.|.	.|.	.|.	.|.	.|.	.|.	.|.	.|.	.|.	.|.	.|.	.|.	.|.	.|.
chr14:56038887-56038915	28|28	.|.	28|28	.|.	28|28	28|28	.|.	.|.	.|.	.|.	.|.	.|.	.|.	28|28	28|28	.|.	.|.	.|.	.|.	.|.	.|.	.|.	28|28	28|28	28|28	28|28	.|.	28|28	28|28	.|.	.|.	.|.	28|28	.|.	.|.	28|28	.|.	.|.	28|28	.|.	28|28	.|.	.|.	28|28	.|.	.|.	.|.	.|.	28|28
chr14:56362243-56362273	.|.	.|.	.|.	.|.	.|.	32|32	.|.	.|.	.|.	.|.	.|.	.|.	.|.	.|.	.|.	.|.	.|.	.|.	.|.	32|32	.|.	.|.	32|32	.|.	.|.	.|.	.|.	24|24	.|.	.|.	32|32	.|.	34|34	30|30	.|.	.|.	.|.	.|.	.|.	.|.	32|32	32|32	.|.	.|.	.|.	.|.	.|.	32|32	.|.
chr14:56392015-56392039	24|24	.|.	.|.	.|.	.|.	.|.	.|.	.|.	.|.	.|.	.|.	.|.	.|.	.|.	.|.	.|.	.|.	.|.	.|.	24|24	.|.	.|.	.|.	.|.	.|.	.|.	24|24	.|.	24|24	.|.	24|24	.|.	.|.	.|.	.|.	.|.	.|.	.|.	.|.	24|24	24|24	.|.	.|.	.|.	.|.	24|24	.|.	.|.	.|.
chr14:58615564-58615598	.|.	.|.	.|.	.|.	38|42	42|42	.|.	.|.	38|40	.|.	.|.	.|.	.|.	.|.	.|.	.|.	.|.	.|.	42|44	40|44	38|40	38|42	40|44	.|.	.|.	.|.	.|.	.|.	.|.	38|40	38|44	.|.	40|42	.|.	.|.	.|.	.|.	.|.	.|.	44|46	42|44	38|40	42|44	.|.	36|40	40|42	.|.	.|.	.|.
chr14:58791993-58792018	25|25	.|.	.|.	.|.	.|.	.|.	.|.	.|.	.|.	.|.	.|.	.|.	.|.	.|.	.|.	.|.	.|.	.|.	.|.	.|.	.|.	.|.	.|.	25|25	.|.	.|.	25|25	.|.	25|25	.|.	25|25	.|.	.|.	.|.	.|.	25|25	.|.	.|.	25|25	25|25	.|.	.|.	.|.	.|.	25|25	.|.	.|.	.|.	.|.
chr14:59035010-59035034	.|.	.|.	.|.	.|.	.|.	22|22	.|.	22|22	.|.	.|.	.|.	.|.	24|22	.|.	.|.	.|.	.|.	.|.	.|.	22|22	.|.	.|.	20|20	.|.	.|.	.|.	.|.	.|.	.|.	.|.	.|.	.|.	.|.	.|.	22|22	.|.	20|20	.|.	.|.	22|22	20|20	.|.	.|.	.|.	22|22	20|20	20|22	20|20	.|.
chr14:59297981-59298029	.|.	.|.	.|.	.|.	.|.	.|.	.|.	.|.	.|.	.|.	.|.	.|.	.|.	.|.	.|.	.|.	.|.	.|.	.|.	.|.	.|.	.|.	.|.	.|.	.|.	.|.	.|.	.|.	38|42	.|.	.|.	.|.	.|.	.|.	44|40	44|40	.|.	.|.	.|.	.|.	.|.	.|.	.|.	.|.	.|.	.|.	.|.	.|.	.|.
chr14:59329910-59329946	.|.	.|.	.|.	40|40	40|40	48|48	48|44	.|.	.|.	.|.	.|.	.|.	.|.	.|.	.|.	.|.	.|.	.|.	.|.	.|.	.|.	.|.	48|48	40|40	.|.	.|.	.|.	.|.	.|.	.|.	48|48	40|40	.|.	.|.	.|.	.|.	48|48	.|.	.|.	.|.	.|.	40|40	40|40	40|40	.|.	40|40	.|.	.|.	.|.
chr14:59979523-59979565	.|.	.|.	.|.	.|.	.|.	.|.	.|.	.|.	.|.	.|.	.|.	.|.	.|.	.|.	.|.	.|.	.|.	.|.	.|.	.|.	.|.	.|.	.|.	36|32	.|.	.|.	.|.	.|.	36|36	.|.	.|.	.|.	.|.	.|.	.|.	.|.	.|.	.|.	.|.	.|.	.|.	.|.	.|.	.|.	.|.	44|46	.|.	.|.	.|.
chr14:60520101-60520139	.|.	.|.	.|.	.|.	.|.	.|.	.|.	.|.	.|.	.|.	.|.	.|.	.|.	.|.	.|.	.|.	.|.	.|.	28|28	.|.	.|.	.|.	28|28	.|.	.|.	.|.	.|.	.|.	26|28	.|.	.|.	.|.	.|.	26|28	.|.	.|.	.|.	.|.	.|.	.|.	.|.	.|.	.|.	.|.	.|.	.|.	.|.	.|.	.|.
chr14:61162007-61162051	.|.	.|.	.|.	.|.	.|.	.|.	.|.	.|.	.|.	.|.	.|.	.|.	.|.	.|.	.|.	.|.	.|.	.|.	.|.	.|.	.|.	.|.	.|.	.|.	.|.	.|.	.|.	.|.	.|.	.|.	.|.	.|.	.|.	.|.	.|.	.|.	.|.	.|.	.|.	.|.	.|.	.|.	.|.	.|.	.|.	.|.	.|.	.|.	.|.
chr14:61364813-61364859	.|.	42|46	32|34	.|.	.|.	.|.	.|.	.|.	.|.	.|.	.|.	.|.	.|.	.|.	.|.	32|34	.|.	.|.	.|.	.|.	.|.	.|.	.|.	.|.	.|.	.|.	.|.	.|.	.|.	.|.	.|.	.|.	34|38	.|.	.|.	34|34	.|.	.|.	.|.	.|.	.|.	.|.	.|.	.|.	.|.	.|.	.|.	.|.	.|.
chr14:61366766-61366800	.|.	.|.	.|.	.|.	.|.	.|.	38|34	.|.	38|36	.|.	36|36	32|26	.|.	.|.	.|.	36|34	.|.	.|.	.|.	30|30	.|.	.|.	.|.	.|.	.|.	.|.	.|.	38|38	38|36	.|.	38|34	.|.	.|.	.|.	.|.	38|34	.|.	.|.	.|.	.|.	.|.	.|.	.|.	.|.	.|.	.|.	.|.	30|30	.|.
chr14:61496981-61497017	.|.	.|.	.|.	.|.	.|.	.|.	34|34	30|32	.|.	.|.	.|.	32|32	32|34	.|.	.|.	.|.	.|.	.|.	.|.	30|32	.|.	.|.	.|.	30|32	.|.	.|.	32|32	.|.	32|32	.|.	32|32	.|.	.|.	32|32	.|.	.|.	32|32	.|.	.|.	32|32	.|.	.|.	32|32	32|32	32|32	32|32	32|32	32|32	.|.
chr14:62404744-62404776	.|.	34|36	.|.	30|34	.|.	.|.	34|36	.|.	36|38	.|.	.|.	.|.	.|.	.|.	.|.	.|.	.|.	.|.	.|.	.|.	.|.	.|.	.|.	36|36	.|.	.|.	34|36	.|.	.|.	.|.	32|32	.|.	.|.	34|34	.|.	.|.	34|36	.|.	.|.	34|36	36|36	.|.	.|.	34|34	.|.	.|.	.|.	.|.	.|.
chr14:62715290-62715336	.|.	.|.	40|40	.|.	.|.	.|.	.|.	.|.	.|.	.|.	.|.	.|.	.|.	.|.	.|.	.|.	.|.	.|.	.|.	36|36	.|.	36|40	38|40	.|.	.|.	.|.	.|.	.|.	36|36	.|.	38|40	.|.	.|.	.|.	36|36	.|.	36|36	.|.	.|.	40|40	40|42	.|.	.|.	.|.	.|.	.|.	36|40	40|40	.|.
chr14:62917843-62917883	26|26	30|30	.|.	.|.	.|.	.|.	.|.	.|.	26|30	.|.	.|.	.|.	26|26	.|.	.|.	.|.	30|30	.|.	.|.	26|30	30|30	.|.	30|30	26|28	26|26	.|.	.|.	.|.	.|.	.|.	.|.	.|.	26|26	.|.	24|26	.|.	26|26	.|.	.|.	.|.	26|30	30|30	28|30	.|.	26|26	.|.	30|30	.|.	.|.
chr14:62983749-62983775	.|.	.|.	.|.	32|32	.|.	.|.	.|.	.|.	.|.	.|.	.|.	.|.	.|.	.|.	.|.	.|.	.|.	.|.	.|.	.|.	.|.	.|.	.|.	32|34	.|.	30|32	32|32	.|.	32|34	.|.	.|.	.|.	.|.	.|.	.|.	.|.	32|34	.|.	.|.	.|.	.|.	.|.	.|.	.|.	.|.	.|.	.|.	.|.	.|.
chr14:63113461-63113495	26|28	.|.	.|.	.|.	34|38	.|.	34|38	.|.	.|.	.|.	.|.	.|.	.|.	34|38	.|.	36|38	.|.	.|.	.|.	28|28	.|.	.|.	34|38	.|.	.|.	28|28	28|28	26|28	.|.	.|.	26|28	.|.	.|.	.|.	.|.	.|.	.|.	.|.	.|.	32|36	.|.	.|.	.|.	.|.	.|.	.|.	32|36	28|28	.|.
chr14:63328355-63328393	.|.	.|.	.|.	.|.	.|.	.|.	.|.	.|.	.|.	.|.	.|.	22|22	.|.	.|.	.|.	.|.	.|.	.|.	.|.	.|.	.|.	.|.	.|.	.|.	.|.	.|.	.|.	.|.	.|.	.|.	.|.	38|40	22|22	.|.	.|.	.|.	.|.	.|.	.|.	.|.	.|.	.|.	42|44	.|.	22|22	.|.	.|.	22|22	.|.
chr14:64075384-64075416	.|.	.|.	.|.	.|.	.|.	.|.	.|.	.|.	.|.	.|.	.|.	.|.	.|.	.|.	.|.	.|.	.|.	.|.	.|.	38|48	.|.	.|.	44|48	46|48	46|48	.|.	.|.	36|36	.|.	44|48	.|.	.|.	.|.	.|.	.|.	.|.	.|.	.|.	.|.	.|.	.|.	44|48	44|48	.|.	.|.	.|.	.|.	.|.	.|.
chr14:64817294-64817324	.|.	.|.	.|.	.|.	.|.	.|.	.|.	.|.	.|.	.|.	.|.	.|.	.|.	.|.	.|.	.|.	.|.	.|.	.|.	.|.	.|.	.|.	.|.	.|.	.|.	.|.	.|.	.|.	.|.	.|.	.|.	.|.	.|.	.|.	.|.	.|.	.|.	.|.	.|.	.|.	.|.	.|.	26|28	.|.	.|.	.|.	.|.	.|.	.|.
chr14:64958915-64958939	.|.	.|.	.|.	.|.	.|.	.|.	.|.	.|.	.|.	.|.	.|.	.|.	.|.	.|.	.|.	.|.	.|.	.|.	27|27	27|27	27|27	.|.	.|.	.|.	.|.	.|.	27|27	.|.	.|.	.|.	27|27	.|.	27|27	.|.	.|.	.|.	27|27	.|.	.|.	.|.	.|.	.|.	27|27	27|27	.|.	27|27	.|.	.|.	27|27
chr14:65739529-65739557	.|.	.|.	.|.	.|.	.|.	.|.	.|.	.|.	.|.	.|.	.|.	.|.	.|.	.|.	.|.	24|26	.|.	.|.	.|.	.|.	.|.	.|.	.|.	.|.	.|.	.|.	.|.	.|.	.|.	.|.	.|.	.|.	.|.	.|.	.|.	.|.	.|.	.|.	.|.	.|.	.|.	.|.	24|26	.|.	.|.	22|26	.|.	.|.	.|.
chr14:65832046-65832078	.|.	.|.	.|.	.|.	.|.	.|.	36|38	.|.	.|.	36|38	26|26	.|.	.|.	.|.	.|.	.|.	26|26	.|.	.|.	.|.	.|.	.|.	.|.	.|.	.|.	.|.	26|26	36|38	.|.	.|.	.|.	.|.	.|.	.|.	.|.	26|24	36|38	.|.	.|.	.|.	34|38	36|38	.|.	26|26	.|.	26|26	.|.	26|24	.|.
chr14:66110383-66110433	.|.	.|.	.|.	.|.	.|.	.|.	.|.	.|.	.|.	.|.	.|.	.|.	.|.	.|.	.|.	.|.	.|.	.|.	.|.	.|.	.|.	.|.	.|.	.|.	.|.	.|.	.|.	.|.	.|.	.|.	.|.	.|.	.|.	.|.	.|.	.|.	.|.	.|.	.|.	.|.	.|.	.|.	.|.	.|.	.|.	.|.	.|.	.|.	.|.
chr14:66684302-66684327	.|.	.|.	.|.	.|.	25|25	.|.	.|.	.|.	.|.	.|.	.|.	.|.	.|.	.|.	.|.	.|.	25|25	.|.	.|.	.|.	.|.	.|.	.|.	.|.	.|.	.|.	.|.	.|.	25|25	.|.	.|.	.|.	.|.	.|.	.|.	.|.	.|.	.|.	.|.	.|.	.|.	.|.	.|.	25|25	.|.	25|25	.|.	.|.	.|.
chr14:66820091-66820123	.|.	28|30	.|.	28|28	.|.	.|.	30|30	28|28	.|.	.|.	28|28	.|.	.|.	.|.	.|.	.|.	.|.	.|.	.|.	.|.	.|.	.|.	.|.	.|.	28|30	.|.	.|.	.|.	.|.	.|.	.|.	28|28	.|.	.|.	.|.	.|.	.|.	.|.	.|.	30|30	.|.	.|.	.|.	.|.	.|.	.|.	.|.	.|.	.|.
chr14:66970227-66970259	.|.	32|30	.|.	.|.	.|.	.|.	.|.	.|.	.|.	.|.	.|.	.|.	.|.	.|.	.|.	.|.	.|.	.|.	.|.	.|.	.|.	.|.	.|.	.|.	.|.	.|.	.|.	.|.	.|.	.|.	32|30	.|.	.|.	.|.	.|.	.|.	.|.	.|.	.|.	.|.	.|.	.|.	.|.	.|.	.|.	32|30	.|.	.|.	.|.
chr14:67039200-67039224	.|.	.|.	.|.	.|.	.|.	.|.	.|.	.|.	.|.	.|.	.|.	.|.	.|.	.|.	.|.	.|.	.|.	.|.	.|.	.|.	.|.	.|.	.|.	.|.	.|.	.|.	.|.	.|.	.|.	.|.	20|22	.|.	22|22	.|.	.|.	.|.	.|.	.|.	.|.	.|.	.|.	.|.	22|22	.|.	.|.	.|.	.|.	.|.	.|.
chr14:68623172-68623212	.|.	.|.	26|26	.|.	.|.	.|.	.|.	.|.	24|36	34|36	26|26	.|.	.|.	30|36	.|.	34|36	.|.	.|.	.|.	.|.	.|.	.|.	.|.	34|36	.|.	.|.	34|36	.|.	26|36	.|.	.|.	.|.	34|38	.|.	.|.	34|36	36|36	.|.	.|.	26|26	.|.	26|26	.|.	36|36	26|36	36|38	34|36	.|.	.|.
chr14:69077560-69077602	.|.	.|.	.|.	.|.	.|.	.|.	.|.	.|.	.|.	.|.	.|.	.|.	.|.	.|.	.|.	.|.	.|.	.|.	.|.	.|.	.|.	.|.	.|.	32|34	.|.	.|.	.|.	.|.	.|.	.|.	.|.	.|.	.|.	.|.	.|.	.|.	.|.	.|.	.|.	.|.	.|.	.|.	.|.	.|.	.|.	.|.	.|.	.|.	.|.
chr14:70212711-70212765	.|.	.|.	.|.	.|.	.|.	.|.	.|.	34|30	36|40	.|.	.|.	.|.	.|.	.|.	.|.	.|.	36|40	36|40	.|.	.|.	.|.	34|30	.|.	.|.	.|.	.|.	.|.	.|.	.|.	32|34	.|.	.|.	32|34	.|.	.|.	.|.	.|.	.|.	.|.	.|.	.|.	.|.	.|.	.|.	.|.	.|.	.|.	.|.	.|.
chr14:70750674-70750710	.|.	.|.	.|.	.|.	.|.	.|.	36|32	.|.	36|34	.|.	.|.	.|.	.|.	.|.	32|34	.|.	.|.	.|.	.|.	.|.	.|.	.|.	.|.	30|32	.|.	36|34	.|.	.|.	.|.	.|.	.|.	.|.	32|32	36|34	.|.	36|34	.|.	32|32	36|34	36|34	30|32	30|32	30|32	.|.	.|.	30|32	.|.	36|36	34|38
chr14:71206219-71206243	.|.	.|.	.|.	.|.	.|.	.|.	.|.	.|.	.|.	26|26	.|.	.|.	.|.	.|.	.|.	.|.	.|.	.|.	.|.	.|.	.|.	.|.	.|.	.|.	.|.	.|.	.|.	.|.	26|26	.|.	.|.	.|.	.|.	.|.	.|.	.|.	.|.	.|.	.|.	.|.	.|.	.|.	.|.	.|.	.|.	.|.	.|.	.|.	.|.
chr14:71420959-71420984	25|25	25|25	25|25	.|.	.|.	25|25	.|.	.|.	.|.	25|25	.|.	.|.	25|25	.|.	.|.	.|.	.|.	.|.	25|25	25|25	.|.	.|.	.|.	.|.	.|.	.|.	25|25	25|25	25|25	.|.	25|25	.|.	.|.	.|.	.|.	.|.	25|25	25|25	.|.	25|25	.|.	.|.	.|.	.|.	25|25	25|25	.|.	25|25	.|.
chr14:71478857-71478881	.|.	.|.	.|.	.|.	.|.	.|.	24|24	24|24	.|.	20|20	.|.	.|.	.|.	.|.	.|.	.|.	.|.	.|.	.|.	16|20	.|.	.|.	.|.	.|.	20|20	20|20	.|.	.|.	.|.	.|.	20|20	.|.	20|20	.|.	.|.	24|24	.|.	.|.	24|20	.|.	24|24	.|.	.|.	.|.	.|.	.|.	.|.	.|.	.|.
chr14:71895109-71895133	.|.	.|.	.|.	.|.	.|.	.|.	.|.	.|.	.|.	.|.	.|.	.|.	.|.	.|.	.|.	.|.	.|.	.|.	.|.	.|.	.|.	.|.	.|.	.|.	.|.	.|.	.|.	.|.	.|.	.|.	.|.	.|.	.|.	.|.	.|.	.|.	.|.	.|.	.|.	.|.	.|.	.|.	.|.	.|.	.|.	.|.	.|.	.|.	.|.
chr14:72520978-72521003	.|.	.|.	.|.	.|.	.|.	.|.	.|.	.|.	.|.	.|.	.|.	.|.	.|.	.|.	.|.	.|.	.|.	.|.	.|.	.|.	25|25	.|.	.|.	.|.	.|.	25|25	25|25	25|25	25|25	.|.	.|.	.|.	.|.	.|.	.|.	.|.	.|.	.|.	25|25	.|.	.|.	.|.	.|.	.|.	20|20	.|.	.|.	.|.	.|.
chr14:72532471-72532496	.|.	.|.	.|.	.|.	25|25	.|.	.|.	.|.	.|.	.|.	.|.	25|25	.|.	.|.	.|.	.|.	.|.	.|.	.|.	.|.	.|.	.|.	.|.	.|.	.|.	.|.	.|.	.|.	.|.	.|.	.|.	.|.	.|.	.|.	.|.	25|25	.|.	.|.	.|.	.|.	.|.	.|.	.|.	.|.	.|.	.|.	.|.	.|.	.|.
chr14:72651077-72651119	48|50	.|.	.|.	.|.	.|.	.|.	.|.	.|.	.|.	.|.	.|.	.|.	.|.	.|.	.|.	.|.	.|.	.|.	.|.	.|.	.|.	.|.	44|46	48|52	46|50	.|.	.|.	.|.	.|.	.|.	.|.	.|.	46|48	.|.	.|.	.|.	46|48	.|.	42|52	.|.	.|.	.|.	.|.	.|.	.|.	.|.	.|.	.|.	.|.
chr14:75506462-75506490	.|.	.|.	.|.	.|.	.|.	.|.	.|.	.|.	.|.	.|.	.|.	.|.	.|.	.|.	.|.	.|.	.|.	.|.	.|.	22|24	.|.	.|.	.|.	.|.	.|.	.|.	.|.	.|.	.|.	.|.	.|.	.|.	.|.	.|.	.|.	.|.	24|26	.|.	.|.	.|.	.|.	.|.	.|.	.|.	.|.	.|.	.|.	.|.	.|.
chr14:75533885-75533929	.|.	.|.	.|.	.|.	.|.	.|.	.|.	.|.	.|.	.|.	.|.	.|.	.|.	.|.	.|.	.|.	.|.	.|.	.|.	.|.	32|34	.|.	.|.	.|.	.|.	.|.	.|.	.|.	.|.	.|.	.|.	.|.	.|.	.|.	.|.	.|.	.|.	.|.	.|.	.|.	.|.	.|.	.|.	.|.	.|.	.|.	.|.	.|.	.|.
chr14:75613611-75613647	.|.	.|.	.|.	.|.	36|36	.|.	.|.	.|.	.|.	.|.	.|.	.|.	.|.	.|.	.|.	.|.	.|.	.|.	.|.	.|.	.|.	.|.	44|44	.|.	.|.	.|.	.|.	.|.	.|.	.|.	.|.	.|.	.|.	.|.	.|.	.|.	.|.	.|.	.|.	.|.	.|.	.|.	.|.	.|.	.|.	.|.	.|.	.|.	.|.
chr14:75760034-75760074	.|.	.|.	.|.	.|.	.|.	.|.	.|.	.|.	.|.	.|.	.|.	.|.	.|.	.|.	.|.	.|.	.|.	.|.	.|.	.|.	.|.	.|.	.|.	.|.	.|.	.|.	.|.	44|48	.|.	.|.	.|.	.|.	.|.	.|.	.|.	.|.	.|.	.|.	.|.	.|.	.|.	.|.	34|30	.|.	.|.	.|.	.|.	.|.	.|.
chr14:76176742-76176780	.|.	.|.	.|.	.|.	.|.	.|.	.|.	.|.	.|.	.|.	.|.	.|.	.|.	.|.	.|.	.|.	34|36	.|.	.|.	.|.	.|.	.|.	30|32	.|.	.|.	.|.	.|.	.|.	30|32	.|.	.|.	.|.	.|.	.|.	.|.	.|.	.|.	.|.	.|.	.|.	.|.	.|.	.|.	.|.	.|.	.|.	.|.	.|.	.|.
chr14:76292639-76292675	.|.	.|.	.|.	.|.	.|.	.|.	.|.	.|.	.|.	.|.	.|.	.|.	.|.	.|.	.|.	.|.	.|.	.|.	.|.	.|.	.|.	.|.	.|.	.|.	.|.	.|.	.|.	.|.	.|.	.|.	.|.	.|.	.|.	.|.	.|.	.|.	.|.	.|.	.|.	.|.	.|.	.|.	.|.	.|.	.|.	.|.	.|.	.|.	.|.
chr14:76323724-76323760	.|.	.|.	.|.	.|.	.|.	.|.	.|.	.|.	.|.	.|.	.|.	.|.	.|.	.|.	.|.	.|.	.|.	.|.	.|.	.|.	44|44	.|.	.|.	.|.	44|44	.|.	.|.	.|.	.|.	.|.	.|.	.|.	.|.	.|.	.|.	.|.	40|40	44|44	.|.	.|.	.|.	.|.	.|.	44|44	.|.	.|.	.|.	.|.	.|.
chr14:76907000-76907024	.|.	.|.	.|.	.|.	.|.	24|24	.|.	24|24	.|.	.|.	.|.	.|.	24|24	.|.	.|.	.|.	.|.	.|.	.|.	.|.	.|.	.|.	.|.	.|.	.|.	24|24	.|.	.|.	24|24	.|.	.|.	.|.	.|.	.|.	24|24	.|.	24|24	.|.	.|.	.|.	.|.	.|.	.|.	.|.	.|.	.|.	.|.	.|.	.|.
chr14:77520703-77520747	52|52	24|52	.|.	.|.	.|.	.|.	.|.	.|.	.|.	52|54	.|.	48|52	.|.	.|.	.|.	.|.	.|.	.|.	.|.	24|24	.|.	.|.	.|.	48|54	.|.	.|.	.|.	.|.	.|.	24|24	50|52	.|.	.|.	.|.	.|.	.|.	.|.	.|.	50|52	.|.	.|.	.|.	52|52	50|50	48|54	46|50	50|54	.|.	.|.
chr14:77872933-77872977	44|40	.|.	.|.	.|.	.|.	42|40	.|.	.|.	.|.	.|.	.|.	.|.	.|.	.|.	38|40	.|.	.|.	.|.	.|.	.|.	.|.	.|.	44|42	42|40	.|.	.|.	.|.	.|.	.|.	.|.	.|.	.|.	.|.	42|42	.|.	.|.	.|.	44|40	.|.	44|40	.|.	.|.	.|.	.|.	38|42	.|.	.|.	.|.	.|.
chr14:78028036-78028060	24|24	24|24	24|24	24|24	24|24	24|24	.|.	.|.	24|24	.|.	.|.	.|.	24|24	.|.	24|24	24|24	24|24	.|.	.|.	24|24	.|.	24|24	24|24	24|24	.|.	24|24	.|.	24|24	.|.	.|.	24|24	24|24	24|24	.|.	.|.	24|24	24|24	24|24	24|24	24|24	24|24	24|24	24|24	24|24	24|24	24|24	24|24	24|24	.|.
chr14:78286982-78287012	.|.	.|.	20|20	.|.	20|20	.|.	.|.	30|32	.|.	.|.	.|.	.|.	.|.	.|.	.|.	30|32	.|.	32|32	.|.	20|20	.|.	.|.	30|32	.|.	20|20	20|20	.|.	.|.	30|32	.|.	.|.	.|.	32|32	.|.	.|.	.|.	.|.	.|.	.|.	.|.	28|32	20|20	20|20	.|.	30|32	.|.	26|28	.|.	30|32
chr14:78734607-78734637	.|.	.|.	30|31	.|.	.|.	.|.	30|31	.|.	.|.	.|.	.|.	.|.	.|.	.|.	.|.	.|.	.|.	.|.	.|.	.|.	.|.	.|.	.|.	.|.	.|.	.|.	.|.	.|.	.|.	30|31	.|.	.|.	.|.	.|.	.|.	.|.	.|.	.|.	.|.	.|.	.|.	.|.	.|.	.|.	.|.	.|.	.|.	.|.	31|31
chr14:79260949-79260977	.|.	.|.	.|.	.|.	.|.	.|.	.|.	.|.	.|.	.|.	.|.	.|.	.|.	.|.	.|.	.|.	.|.	.|.	.|.	.|.	.|.	.|.	.|.	.|.	.|.	.|.	.|.	.|.	.|.	.|.	.|.	.|.	.|.	.|.	.|.	.|.	.|.	.|.	.|.	.|.	.|.	.|.	.|.	.|.	.|.	.|.	.|.	.|.	.|.
chr14:79436157-79436199	.|.	.|.	.|.	.|.	.|.	.|.	.|.	.|.	.|.	.|.	.|.	.|.	.|.	.|.	.|.	42|46	.|.	.|.	.|.	.|.	.|.	.|.	.|.	.|.	.|.	.|.	.|.	.|.	42|44	.|.	.|.	.|.	.|.	.|.	.|.	.|.	.|.	.|.	.|.	.|.	.|.	34|34	.|.	.|.	.|.	.|.	.|.	.|.	.|.
chr14:79500692-79500720	.|.	.|.	.|.	.|.	.|.	.|.	.|.	.|.	.|.	.|.	.|.	.|.	.|.	.|.	.|.	.|.	.|.	.|.	.|.	26|26	.|.	.|.	.|.	.|.	.|.	.|.	.|.	.|.	.|.	.|.	.|.	.|.	.|.	.|.	.|.	.|.	.|.	.|.	.|.	.|.	.|.	.|.	.|.	.|.	.|.	.|.	.|.	.|.	.|.
chr14:80010425-80010449	.|.	24|24	.|.	.|.	.|.	.|.	.|.	.|.	.|.	.|.	.|.	.|.	.|.	.|.	.|.	.|.	.|.	.|.	.|.	.|.	.|.	.|.	24|24	.|.	.|.	.|.	.|.	.|.	.|.	.|.	.|.	.|.	.|.	.|.	24|24	.|.	.|.	.|.	.|.	.|.	.|.	.|.	.|.	24|24	.|.	.|.	.|.	.|.	.|.
chr14:81198815-81198863	60|64	.|.	.|.	.|.	.|.	.|.	.|.	.|.	.|.	.|.	.|.	.|.	.|.	.|.	.|.	.|.	.|.	.|.	.|.	40|38	.|.	.|.	.|.	48|40	.|.	.|.	.|.	.|.	.|.	.|.	.|.	.|.	60|64	.|.	.|.	.|.	.|.	.|.	.|.	.|.	.|.	.|.	.|.	.|.	.|.	.|.	.|.	.|.	.|.
chr14:81993782-81993816	.|.	.|.	.|.	.|.	26|26	.|.	.|.	.|.	.|.	.|.	.|.	.|.	.|.	.|.	.|.	.|.	.|.	.|.	.|.	.|.	.|.	.|.	.|.	.|.	44|46	.|.	26|26	.|.	.|.	.|.	.|.	.|.	.|.	.|.	.|.	.|.	.|.	.|.	.|.	46|48	.|.	.|.	.|.	.|.	.|.	.|.	.|.	.|.	.|.
chr14:82518129-82518173	.|.	.|.	.|.	.|.	.|.	.|.	.|.	.|.	.|.	.|.	.|.	.|.	.|.	.|.	.|.	.|.	.|.	.|.	.|.	.|.	34|38	.|.	.|.	.|.	.|.	.|.	.|.	.|.	.|.	.|.	.|.	.|.	.|.	.|.	.|.	.|.	.|.	.|.	.|.	.|.	.|.	.|.	.|.	.|.	.|.	.|.	.|.	.|.	.|.
chr14:82545077-82545119	.|.	.|.	.|.	.|.	.|.	.|.	.|.	28|28	.|.	22|22	.|.	.|.	.|.	.|.	.|.	.|.	.|.	.|.	.|.	30|30	.|.	.|.	.|.	.|.	.|.	.|.	.|.	.|.	26|30	.|.	.|.	.|.	.|.	.|.	.|.	22|22	.|.	.|.	.|.	.|.	.|.	.|.	.|.	.|.	.|.	.|.	.|.	.|.	22|22
chr14:82549361-82549393	.|.	.|.	.|.	.|.	.|.	.|.	.|.	.|.	.|.	.|.	.|.	.|.	.|.	.|.	.|.	.|.	30|28	.|.	.|.	.|.	.|.	.|.	.|.	.|.	.|.	.|.	.|.	.|.	.|.	.|.	32|34	.|.	.|.	.|.	.|.	.|.	.|.	.|.	.|.	.|.	.|.	.|.	.|.	.|.	.|.	34|36	.|.	.|.	.|.
chr14:82649662-82649692	.|.	34|36	.|.	26|26	.|.	.|.	.|.	.|.	34|36	.|.	26|34	34|36	24|26	.|.	.|.	.|.	.|.	.|.	.|.	26|36	34|36	34|36	.|.	.|.	.|.	.|.	26|26	26|36	26|26	.|.	.|.	.|.	.|.	.|.	.|.	26|26	26|26	26|26	26|34	.|.	26|26	34|36	.|.	.|.	26|26	34|36	26|26	.|.	24|24
chr14:82759090-82759114	.|.	.|.	.|.	.|.	.|.	.|.	.|.	.|.	.|.	.|.	.|.	.|.	.|.	.|.	.|.	.|.	.|.	.|.	.|.	.|.	.|.	.|.	.|.	.|.	.|.	.|.	.|.	.|.	.|.	.|.	28|28	.|.	.|.	.|.	.|.	.|.	.|.	.|.	28|28	.|.	.|.	.|.	.|.	.|.	.|.	.|.	.|.	.|.	.|.
chr14:82761243-82761291	38|40	.|.	.|.	.|.	.|.	.|.	.|.	.|.	.|.	.|.	.|.	.|.	.|.	.|.	.|.	.|.	.|.	.|.	.|.	.|.	38|40	.|.	.|.	.|.	.|.	.|.	.|.	.|.	.|.	.|.	.|.	.|.	.|.	.|.	.|.	.|.	.|.	.|.	.|.	.|.	.|.	.|.	.|.	.|.	.|.	.|.	.|.	.|.	.|.
chr14:82925973-82926007	34|24	34|32	.|.	.|.	34|24	.|.	24|24	.|.	.|.	24|24	.|.	34|22	.|.	.|.	.|.	34|32	.|.	.|.	.|.	22|24	.|.	.|.	.|.	24|24	24|24	34|32	.|.	.|.	24|24	.|.	.|.	.|.	.|.	.|.	34|24	.|.	.|.	24|26	24|24	.|.	34|24	24|24	24|24	24|24	24|24	.|.	24|24	34|32	.|.
chr14:83111454-83111492	.|.	36|36	34|36	.|.	.|.	.|.	34|36	.|.	.|.	.|.	.|.	.|.	.|.	.|.	.|.	.|.	.|.	.|.	.|.	.|.	.|.	.|.	.|.	.|.	38|36	.|.	.|.	.|.	.|.	.|.	34|36	.|.	.|.	.|.	.|.	.|.	.|.	.|.	.|.	.|.	.|.	.|.	32|36	.|.	36|36	34|36	.|.	.|.	.|.
chr14:83176509-83176549	40|40	.|.	.|.	.|.	.|.	42|42	.|.	.|.	.|.	.|.	.|.	34|42	.|.	.|.	42|42	34|36	.|.	.|.	40|38	40|36	.|.	34|34	.|.	.|.	40|40	34|34	34|34	.|.	40|40	40|40	40|34	34|34	42|42	.|.	.|.	.|.	40|44	34|34	40|42	34|34	42|42	.|.	.|.	.|.	.|.	.|.	.|.	.|.	44|44
chr14:83869234-83869268	.|.	30|44	.|.	.|.	42|44	.|.	.|.	.|.	28|32	42|44	.|.	30|30	.|.	.|.	.|.	30|30	.|.	.|.	.|.	.|.	.|.	30|30	.|.	.|.	.|.	30|30	30|30	30|30	.|.	.|.	30|30	.|.	30|30	30|30	.|.	30|30	30|30	28|30	.|.	30|30	30|30	30|46	30|30	30|30	26|30	30|44	.|.	.|.	30|30
chr14:84367560-84367602	.|.	.|.	.|.	.|.	.|.	.|.	.|.	.|.	.|.	.|.	.|.	.|.	.|.	.|.	.|.	.|.	.|.	.|.	.|.	.|.	.|.	.|.	.|.	44|46	.|.	.|.	46|46	.|.	.|.	.|.	.|.	.|.	.|.	.|.	.|.	46|46	.|.	.|.	.|.	.|.	.|.	.|.	.|.	.|.	.|.	.|.	44|46	.|.	.|.
chr14:84530558-84530592	.|.	.|.	.|.	.|.	.|.	.|.	.|.	.|.	.|.	.|.	.|.	.|.	.|.	.|.	.|.	.|.	.|.	.|.	.|.	.|.	.|.	.|.	.|.	26|28	.|.	.|.	.|.	.|.	.|.	.|.	.|.	.|.	.|.	.|.	.|.	.|.	.|.	.|.	.|.	.|.	.|.	.|.	.|.	.|.	.|.	.|.	.|.	.|.	.|.
chr14:84676588-84676624	.|.	.|.	.|.	.|.	.|.	.|.	.|.	.|.	.|.	24|26	.|.	.|.	.|.	.|.	.|.	.|.	.|.	.|.	.|.	24|26	.|.	28|30	.|.	.|.	.|.	.|.	.|.	.|.	24|26	.|.	.|.	.|.	.|.	.|.	.|.	.|.	.|.	.|.	.|.	.|.	.|.	.|.	.|.	.|.	.|.	.|.	.|.	.|.	.|.
chr14:84693365-84693391	.|.	.|.	.|.	.|.	.|.	.|.	.|.	.|.	.|.	.|.	.|.	.|.	.|.	.|.	.|.	.|.	.|.	.|.	.|.	.|.	.|.	.|.	22|22	.|.	.|.	.|.	.|.	.|.	.|.	.|.	.|.	.|.	.|.	.|.	.|.	.|.	.|.	.|.	.|.	.|.	.|.	.|.	.|.	.|.	.|.	.|.	.|.	.|.	.|.
chr14:84766031-84766061	.|.	.|.	26|28	.|.	.|.	.|.	28|28	28|28	.|.	.|.	.|.	.|.	26|28	.|.	.|.	.|.	.|.	.|.	.|.	28|28	26|28	.|.	26|28	.|.	.|.	.|.	28|28	.|.	26|26	.|.	26|28	.|.	20|28	26|28	.|.	26|28	.|.	.|.	.|.	26|28	28|28	26|28	.|.	26|28	.|.	28|28	28|28	26|28	.|.
chr14:85107508-85107552	40|44	.|.	.|.	.|.	.|.	.|.	.|.	.|.	.|.	.|.	.|.	.|.	.|.	.|.	.|.	.|.	.|.	.|.	.|.	.|.	.|.	.|.	44|44	.|.	40|44	.|.	.|.	.|.	44|44	.|.	.|.	40|44	.|.	.|.	44|44	.|.	.|.	.|.	.|.	.|.	.|.	.|.	.|.	.|.	.|.	.|.	.|.	.|.	.|.
chr14:85396979-85397023	.|.	.|.	.|.	.|.	.|.	.|.	.|.	.|.	.|.	.|.	.|.	.|.	.|.	.|.	.|.	.|.	.|.	.|.	.|.	.|.	.|.	.|.	.|.	.|.	32|26	32|34	.|.	.|.	.|.	.|.	.|.	.|.	.|.	.|.	.|.	.|.	.|.	.|.	.|.	.|.	.|.	.|.	.|.	.|.	.|.	.|.	.|.	.|.	.|.
chr14:85442424-85442462	.|.	.|.	.|.	36|36	.|.	.|.	.|.	.|.	.|.	.|.	.|.	.|.	.|.	.|.	.|.	.|.	.|.	.|.	.|.	.|.	.|.	.|.	34|36	.|.	.|.	.|.	.|.	.|.	.|.	.|.	.|.	.|.	.|.	.|.	.|.	.|.	28|28	.|.	.|.	34|34	.|.	28|26	.|.	.|.	.|.	.|.	.|.	.|.	.|.
chr14:85549875-85549907	.|.	.|.	.|.	.|.	.|.	.|.	40|40	.|.	.|.	.|.	.|.	.|.	.|.	.|.	.|.	.|.	.|.	.|.	.|.	.|.	.|.	.|.	.|.	.|.	.|.	.|.	.|.	.|.	.|.	.|.	.|.	.|.	.|.	.|.	26|28	.|.	.|.	.|.	.|.	.|.	.|.	.|.	.|.	.|.	.|.	.|.	.|.	.|.	.|.
chr14:85624262-85624288	.|.	.|.	.|.	.|.	.|.	.|.	.|.	.|.	.|.	.|.	.|.	.|.	.|.	.|.	.|.	.|.	.|.	.|.	.|.	.|.	.|.	26|24	.|.	.|.	.|.	.|.	.|.	.|.	.|.	.|.	.|.	.|.	.|.	.|.	.|.	26|24	.|.	.|.	.|.	.|.	.|.	.|.	.|.	.|.	.|.	.|.	.|.	.|.	.|.
chr14:85709636-85709680	.|.	.|.	.|.	.|.	.|.	.|.	.|.	.|.	.|.	.|.	.|.	.|.	.|.	.|.	.|.	.|.	.|.	.|.	.|.	.|.	.|.	.|.	.|.	.|.	.|.	.|.	.|.	.|.	.|.	.|.	.|.	.|.	.|.	34|36	.|.	.|.	.|.	.|.	.|.	.|.	.|.	.|.	.|.	.|.	.|.	.|.	.|.	.|.	.|.
chr14:86117605-86117633	.|.	22|24	.|.	.|.	.|.	.|.	.|.	.|.	.|.	.|.	.|.	.|.	.|.	22|22	.|.	.|.	.|.	.|.	.|.	20|22	.|.	.|.	.|.	.|.	26|24	.|.	.|.	22|24	.|.	.|.	.|.	.|.	.|.	.|.	.|.	.|.	.|.	.|.	26|28	.|.	26|24	.|.	.|.	.|.	.|.	.|.	.|.	.|.	.|.
chr14:86362338-86362366	.|.	.|.	.|.	26|26	26|28	.|.	.|.	.|.	.|.	.|.	.|.	.|.	.|.	.|.	.|.	.|.	.|.	28|28	.|.	.|.	.|.	26|26	.|.	.|.	.|.	.|.	26|28	.|.	28|28	.|.	26|26	.|.	28|28	.|.	.|.	.|.	28|28	.|.	.|.	.|.	26|28	.|.	.|.	.|.	28|28	24|28	.|.	.|.	28|28
chr14:86422854-86422882	24|26	.|.	.|.	.|.	24|26	.|.	.|.	.|.	.|.	20|22	.|.	.|.	.|.	.|.	.|.	26|26	.|.	.|.	.|.	20|26	.|.	.|.	22|26	.|.	.|.	.|.	.|.	.|.	.|.	.|.	.|.	.|.	.|.	.|.	.|.	22|22	.|.	.|.	22|22	28|26	22|24	.|.	.|.	.|.	.|.	22|22	.|.	.|.	22|26
chr14:86787484-86787508	.|.	.|.	.|.	.|.	.|.	.|.	.|.	.|.	32|34	.|.	.|.	.|.	.|.	.|.	.|.	.|.	.|.	.|.	.|.	34|34	.|.	.|.	.|.	.|.	.|.	.|.	.|.	.|.	.|.	.|.	.|.	.|.	.|.	.|.	.|.	.|.	.|.	.|.	.|.	.|.	.|.	.|.	.|.	.|.	.|.	.|.	.|.	.|.	.|.
chr14:86885153-86885197	.|.	.|.	.|.	.|.	.|.	.|.	.|.	.|.	.|.	.|.	.|.	.|.	.|.	.|.	.|.	.|.	.|.	.|.	.|.	34|36	.|.	.|.	.|.	.|.	.|.	.|.	.|.	.|.	.|.	.|.	.|.	.|.	.|.	.|.	.|.	.|.	.|.	.|.	.|.	.|.	.|.	.|.	.|.	.|.	.|.	.|.	32|36	.|.	.|.
chr14:87151253-87151281	.|.	.|.	.|.	.|.	.|.	.|.	.|.	.|.	.|.	.|.	.|.	.|.	.|.	.|.	.|.	.|.	.|.	.|.	.|.	.|.	.|.	.|.	.|.	.|.	.|.	.|.	.|.	34|32	34|34	.|.	.|.	.|.	.|.	.|.	.|.	.|.	.|.	.|.	.|.	.|.	.|.	.|.	.|.	.|.	.|.	.|.	.|.	.|.	.|.
chr14:87378915-87378945	.|.	.|.	.|.	.|.	.|.	.|.	.|.	.|.	.|.	.|.	.|.	.|.	.|.	.|.	.|.	.|.	.|.	.|.	32|32	.|.	.|.	.|.	.|.	.|.	.|.	.|.	.|.	.|.	.|.	.|.	.|.	.|.	.|.	.|.	.|.	.|.	.|.	.|.	.|.	.|.	.|.	.|.	.|.	.|.	.|.	.|.	.|.	30|32	.|.
chr14:87381554-87381588	.|.	.|.	.|.	.|.	.|.	.|.	.|.	.|.	.|.	.|.	.|.	.|.	.|.	.|.	.|.	.|.	.|.	.|.	.|.	.|.	.|.	.|.	.|.	.|.	.|.	.|.	.|.	.|.	.|.	.|.	28|30	.|.	.|.	.|.	.|.	.|.	26|24	.|.	.|.	.|.	.|.	.|.	.|.	.|.	.|.	.|.	.|.	.|.	.|.
chr14:87750815-87750851	.|.	.|.	.|.	.|.	.|.	.|.	.|.	.|.	.|.	.|.	.|.	.|.	.|.	.|.	.|.	.|.	.|.	.|.	.|.	60|62	.|.	.|.	.|.	62|62	58|62	60|62	.|.	.|.	56|58	.|.	.|.	.|.	60|62	.|.	.|.	.|.	.|.	.|.	62|62	.|.	58|62	.|.	.|.	.|.	.|.	.|.	58|60	60|62	.|.
chr14:87986576-87986606	.|.	.|.	.|.	.|.	.|.	.|.	.|.	.|.	.|.	.|.	.|.	.|.	.|.	.|.	.|.	.|.	.|.	.|.	.|.	.|.	.|.	.|.	.|.	.|.	.|.	.|.	.|.	.|.	.|.	.|.	.|.	.|.	.|.	32|32	.|.	.|.	.|.	.|.	.|.	.|.	.|.	.|.	.|.	.|.	.|.	.|.	.|.	.|.	.|.
chr14:88267019-88267045	.|.	.|.	.|.	.|.	.|.	.|.	.|.	.|.	.|.	.|.	.|.	.|.	.|.	.|.	.|.	.|.	.|.	.|.	.|.	.|.	.|.	.|.	34|36	.|.	32|34	.|.	.|.	.|.	.|.	.|.	.|.	.|.	.|.	.|.	.|.	.|.	.|.	.|.	.|.	34|36	.|.	.|.	.|.	.|.	.|.	.|.	32|36	.|.	.|.
chr14:88388040-88388086	.|.	46|50	.|.	.|.	.|.	.|.	.|.	.|.	.|.	.|.	.|.	.|.	.|.	.|.	.|.	.|.	.|.	.|.	.|.	40|42	.|.	40|42	.|.	40|42	.|.	.|.	46|50	.|.	48|50	46|50	.|.	.|.	40|42	40|42	.|.	.|.	44|48	.|.	.|.	.|.	.|.	.|.	38|40	.|.	46|48	.|.	.|.	.|.	.|.
chr14:88428922-88428968	32|36	.|.	.|.	.|.	.|.	26|24	26|24	26|24	.|.	.|.	.|.	.|.	.|.	.|.	.|.	.|.	.|.	.|.	.|.	.|.	.|.	.|.	.|.	.|.	.|.	.|.	.|.	.|.	.|.	.|.	.|.	.|.	.|.	.|.	.|.	.|.	.|.	.|.	.|.	.|.	.|.	.|.	.|.	.|.	.|.	.|.	.|.	.|.	.|.
chr14:88745708-88745754	30|32	.|.	.|.	.|.	.|.	.|.	32|32	.|.	.|.	.|.	.|.	.|.	.|.	.|.	.|.	.|.	.|.	.|.	.|.	.|.	.|.	.|.	.|.	.|.	.|.	.|.	.|.	.|.	.|.	.|.	.|.	.|.	.|.	.|.	.|.	.|.	.|.	.|.	.|.	.|.	.|.	.|.	.|.	.|.	.|.	.|.	.|.	.|.	.|.
chr14:88807946-88807988	.|.	24|22	.|.	.|.	.|.	.|.	.|.	.|.	.|.	.|.	.|.	.|.	30|32	.|.	.|.	.|.	30|32	.|.	.|.	.|.	30|32	.|.	28|30	.|.	.|.	22|24	28|32	.|.	22|24	.|.	42|24	.|.	.|.	.|.	.|.	.|.	28|30	.|.	.|.	28|30	30|32	28|30	.|.	30|32	.|.	28|32	28|32	30|30	24|24
chr14:89183076-89183108	32|28	.|.	.|.	.|.	.|.	.|.	.|.	.|.	.|.	.|.	.|.	.|.	.|.	.|.	.|.	.|.	.|.	.|.	28|30	26|28	28|28	28|30	.|.	.|.	.|.	.|.	.|.	.|.	30|32	.|.	28|30	.|.	.|.	.|.	.|.	.|.	28|28	.|.	.|.	.|.	.|.	.|.	.|.	.|.	.|.	.|.	28|30	.|.	.|.
chr14:89499916-89499956	.|.	.|.	44|44	.|.	48|48	48|48	.|.	.|.	.|.	.|.	.|.	.|.	.|.	.|.	.|.	.|.	.|.	.|.	.|.	42|44	.|.	42|44	42|44	40|40	.|.	.|.	.|.	.|.	42|42	.|.	42|42	.|.	.|.	44|48	.|.	.|.	.|.	44|44	.|.	.|.	42|46	.|.	.|.	.|.	.|.	44|44	.|.	.|.	.|.
chr14:89627900-89627940	36|40	.|.	38|40	.|.	.|.	.|.	.|.	.|.	.|.	28|30	.|.	.|.	.|.	.|.	.|.	.|.	.|.	.|.	.|.	.|.	.|.	.|.	.|.	.|.	.|.	36|40	.|.	38|40	38|40	.|.	28|30	.|.	.|.	.|.	.|.	36|40	.|.	.|.	30|30	.|.	38|40	.|.	28|30	30|30	38|38	30|30	28|30	.|.	.|.
chr14:89801421-89801467	.|.	56|56	.|.	.|.	.|.	.|.	.|.	.|.	.|.	.|.	.|.	.|.	.|.	.|.	.|.	.|.	.|.	.|.	.|.	.|.	.|.	.|.	.|.	.|.	.|.	.|.	.|.	.|.	.|.	.|.	.|.	.|.	.|.	.|.	.|.	.|.	.|.	.|.	.|.	.|.	.|.	.|.	.|.	.|.	.|.	.|.	.|.	.|.	.|.
chr14:89821201-89821225	.|.	24|24	.|.	.|.	.|.	.|.	24|24	.|.	.|.	.|.	.|.	.|.	.|.	.|.	.|.	.|.	.|.	.|.	.|.	.|.	.|.	.|.	.|.	.|.	.|.	.|.	.|.	.|.	.|.	.|.	.|.	.|.	.|.	.|.	.|.	.|.	.|.	.|.	.|.	.|.	24|24	.|.	.|.	.|.	24|24	.|.	.|.	.|.	24|24
chr14:89882191-89882227	.|.	.|.	.|.	.|.	.|.	.|.	.|.	.|.	.|.	.|.	.|.	.|.	.|.	.|.	.|.	.|.	.|.	.|.	.|.	.|.	.|.	.|.	.|.	28|28	.|.	.|.	.|.	28|28	.|.	.|.	.|.	.|.	.|.	28|28	.|.	.|.	.|.	28|28	.|.	.|.	.|.	.|.	.|.	.|.	.|.	.|.	28|28	.|.	.|.
chr14:90143153-90143183	.|.	.|.	.|.	.|.	.|.	.|.	.|.	.|.	.|.	.|.	.|.	.|.	.|.	.|.	.|.	.|.	.|.	.|.	.|.	.|.	.|.	.|.	.|.	.|.	.|.	.|.	.|.	.|.	.|.	.|.	30|30	.|.	.|.	.|.	.|.	.|.	.|.	.|.	.|.	.|.	.|.	.|.	.|.	.|.	.|.	.|.	.|.	.|.	.|.
chr14:90905733-90905757	.|.	.|.	.|.	.|.	.|.	.|.	24|24	.|.	24|24	24|24	24|24	24|24	.|.	.|.	.|.	.|.	.|.	.|.	.|.	24|24	.|.	24|24	24|24	24|24	24|24	.|.	24|24	.|.	24|24	.|.	24|24	.|.	24|24	24|24	24|24	24|24	.|.	.|.	24|24	24|24	24|24	24|24	24|24	24|24	.|.	24|24	24|24	.|.	.|.
chr14:91314160-91314184	24|24	.|.	.|.	.|.	.|.	.|.	.|.	.|.	.|.	.|.	24|24	.|.	.|.	.|.	.|.	.|.	24|24	.|.	.|.	24|24	.|.	.|.	.|.	.|.	.|.	.|.	.|.	.|.	24|24	.|.	.|.	.|.	.|.	.|.	.|.	24|20	.|.	.|.	.|.	.|.	.|.	.|.	.|.	.|.	.|.	.|.	.|.	.|.	.|.
chr14:92914689-92914723	.|.	.|.	.|.	.|.	.|.	.|.	.|.	.|.	.|.	.|.	.|.	.|.	.|.	.|.	30|30	.|.	30|30	.|.	.|.	.|.	.|.	.|.	.|.	.|.	.|.	30|30	.|.	.|.	.|.	.|.	.|.	.|.	30|30	.|.	.|.	.|.	.|.	.|.	.|.	.|.	.|.	.|.	.|.	.|.	.|.	.|.	.|.	.|.	.|.
chr14:94451636-94451670	.|.	40|44	.|.	.|.	.|.	.|.	32|32	32|44	.|.	.|.	.|.	.|.	.|.	.|.	.|.	.|.	.|.	.|.	.|.	.|.	32|32	.|.	.|.	.|.	.|.	32|32	.|.	.|.	.|.	.|.	30|32	.|.	.|.	32|32	.|.	.|.	38|40	.|.	.|.	.|.	.|.	30|32	.|.	.|.	32|44	32|38	38|40	32|32	.|.
chr14:94944211-94944259	.|.	.|.	.|.	.|.	.|.	.|.	.|.	.|.	.|.	.|.	.|.	.|.	.|.	.|.	.|.	.|.	34|36	.|.	.|.	.|.	.|.	.|.	.|.	.|.	.|.	36|38	.|.	.|.	.|.	.|.	.|.	.|.	.|.	.|.	.|.	.|.	.|.	.|.	.|.	.|.	.|.	36|38	.|.	.|.	36|38	38|38	.|.	.|.	.|.
chr14:95007179-95007217	.|.	.|.	.|.	.|.	32|32	.|.	32|32	.|.	.|.	.|.	.|.	.|.	.|.	.|.	.|.	.|.	.|.	.|.	.|.	52|56	52|60	32|32	56|62	30|30	56|58	.|.	54|58	.|.	.|.	.|.	.|.	.|.	.|.	.|.	.|.	32|32	.|.	.|.	.|.	30|32	.|.	.|.	.|.	.|.	.|.	.|.	.|.	.|.	.|.
chr14:95025091-95025127	.|.	.|.	.|.	36|36	36|36	40|40	.|.	36|36	.|.	.|.	.|.	.|.	.|.	.|.	.|.	.|.	.|.	.|.	.|.	40|40	.|.	40|40	.|.	.|.	40|40	.|.	40|40	40|40	36|36	36|36	36|36	.|.	.|.	.|.	.|.	.|.	.|.	.|.	.|.	40|40	.|.	36|36	.|.	.|.	36|40	36|36	36|36	36|36	.|.
chr14:95682152-95682196	.|.	.|.	.|.	.|.	.|.	.|.	.|.	28|30	.|.	26|30	30|30	.|.	30|30	.|.	28|30	34|36	.|.	.|.	34|36	28|30	.|.	30|30	.|.	36|36	34|36	.|.	34|36	.|.	34|36	30|30	.|.	.|.	30|30	30|30	.|.	30|30	28|30	.|.	.|.	28|30	.|.	28|30	.|.	.|.	.|.	.|.	.|.	.|.	30|36
chr14:95984255-95984293	32|32	.|.	.|.	.|.	.|.	.|.	.|.	.|.	.|.	32|34	.|.	.|.	.|.	.|.	.|.	.|.	.|.	.|.	.|.	.|.	.|.	.|.	.|.	30|34	.|.	.|.	28|30	.|.	.|.	.|.	.|.	.|.	.|.	.|.	.|.	.|.	.|.	.|.	.|.	.|.	.|.	.|.	.|.	34|34	.|.	.|.	32|34	.|.	.|.
chr14:96121419-96121461	.|.	.|.	.|.	.|.	.|.	36|36	.|.	32|32	30|32	.|.	.|.	.|.	36|36	.|.	.|.	.|.	.|.	.|.	.|.	34|36	.|.	.|.	.|.	.|.	32|32	.|.	.|.	32|36	.|.	.|.	36|36	.|.	.|.	.|.	.|.	.|.	.|.	.|.	38|38	.|.	.|.	.|.	32|32	36|38	.|.	.|.	.|.	.|.	34|36
chr14:96762064-96762090	.|.	.|.	.|.	.|.	.|.	.|.	.|.	.|.	.|.	.|.	.|.	.|.	48|48	.|.	.|.	.|.	.|.	.|.	.|.	.|.	.|.	.|.	.|.	.|.	.|.	.|.	38|46	.|.	.|.	.|.	38|38	.|.	.|.	.|.	38|40	.|.	.|.	48|46	.|.	.|.	.|.	.|.	.|.	.|.	.|.	.|.	.|.	.|.	.|.
chr14:97537263-97537295	.|.	.|.	.|.	36|38	.|.	.|.	.|.	36|38	.|.	.|.	.|.	38|38	36|38	.|.	36|38	.|.	.|.	36|38	.|.	36|38	36|38	36|38	.|.	.|.	36|40	.|.	.|.	.|.	36|38	.|.	34|38	.|.	36|38	.|.	.|.	36|38	.|.	34|36	.|.	36|38	.|.	.|.	.|.	.|.	.|.	.|.	38|40	.|.	.|.
chr14:97640597-97640643	.|.	.|.	.|.	.|.	.|.	.|.	.|.	.|.	.|.	.|.	.|.	.|.	.|.	.|.	.|.	.|.	.|.	.|.	.|.	.|.	.|.	.|.	.|.	46|44	.|.	28|32	.|.	.|.	.|.	.|.	.|.	.|.	.|.	.|.	.|.	.|.	.|.	.|.	.|.	.|.	.|.	.|.	.|.	.|.	.|.	.|.	.|.	.|.	.|.
chr14:97751174-97751200	22|22	.|.	.|.	.|.	.|.	22|22	24|24	.|.	22|22	24|24	.|.	22|22	24|24	.|.	.|.	.|.	.|.	.|.	.|.	22|24	24|24	22|22	.|.	.|.	.|.	.|.	.|.	22|22	.|.	24|24	.|.	.|.	22|22	.|.	.|.	22|24	22|24	.|.	.|.	22|24	24|24	22|22	24|24	.|.	22|22	22|22	.|.	20|22	.|.
chr14:98505607-98505633	.|.	.|.	.|.	.|.	.|.	.|.	.|.	.|.	.|.	.|.	.|.	.|.	.|.	.|.	.|.	.|.	.|.	.|.	.|.	.|.	.|.	.|.	.|.	.|.	.|.	.|.	.|.	.|.	.|.	.|.	.|.	.|.	.|.	.|.	.|.	.|.	.|.	.|.	.|.	.|.	.|.	.|.	.|.	22|22	.|.	.|.	.|.	.|.	.|.
chr14:98963869-98963907	32|34	.|.	30|34	.|.	.|.	32|34	34|36	32|36	.|.	.|.	.|.	.|.	.|.	.|.	.|.	32|34	.|.	.|.	.|.	32|36	.|.	.|.	.|.	32|34	.|.	.|.	.|.	.|.	34|36	.|.	34|36	.|.	.|.	.|.	.|.	34|36	32|34	.|.	.|.	.|.	32|34	32|32	.|.	32|34	.|.	34|36	.|.	.|.	.|.
chr14:99224279-99224323	30|30	30|36	36|38	28|30	.|.	.|.	.|.	.|.	.|.	.|.	.|.	.|.	.|.	36|38	30|26	30|38	.|.	.|.	.|.	32|38	.|.	.|.	.|.	.|.	.|.	.|.	.|.	.|.	.|.	.|.	.|.	.|.	.|.	30|30	.|.	.|.	.|.	36|38	30|30	.|.	.|.	40|40	.|.	.|.	.|.	36|38	28|30	.|.	.|.
chr14:99831326-99831350	.|.	.|.	.|.	.|.	.|.	.|.	.|.	.|.	.|.	.|.	.|.	.|.	.|.	.|.	.|.	24|24	.|.	.|.	.|.	.|.	.|.	.|.	.|.	.|.	.|.	.|.	.|.	.|.	.|.	.|.	.|.	.|.	24|24	.|.	.|.	.|.	.|.	.|.	.|.	.|.	.|.	.|.	.|.	24|24	.|.	.|.	.|.	.|.	.|.
chr14:99843500-99843530	.|.	.|.	.|.	.|.	.|.	.|.	.|.	.|.	.|.	.|.	.|.	.|.	.|.	.|.	.|.	.|.	.|.	.|.	.|.	.|.	.|.	.|.	.|.	.|.	.|.	.|.	.|.	.|.	.|.	.|.	.|.	.|.	.|.	.|.	.|.	.|.	.|.	.|.	.|.	.|.	.|.	.|.	.|.	.|.	.|.	.|.	.|.	.|.	.|.
chr15:101493713-101493739	.|.	.|.	.|.	.|.	16|18	.|.	16|18	.|.	18|18	.|.	18|20	.|.	14|18	.|.	.|.	.|.	.|.	.|.	.|.	16|20	.|.	18|18	.|.	.|.	.|.	.|.	.|.	.|.	.|.	.|.	.|.	.|.	.|.	.|.	.|.	18|20	.|.	.|.	.|.	18|18	.|.	16|18	.|.	.|.	.|.	.|.	.|.	16|20	16|18
chr15:20368528-20368570	.|.	.|.	.|.	.|.	.|.	.|.	.|.	.|.	.|.	.|.	24|24	.|.	.|.	.|.	.|.	.|.	.|.	.|.	.|.	30|30	24|24	.|.	.|.	.|.	28|28	.|.	.|.	.|.	34|36	.|.	.|.	30|32	.|.	.|.	.|.	.|.	.|.	.|.	.|.	.|.	.|.	.|.	.|.	.|.	.|.	.|.	.|.	.|.	.|.
chr15:22092214-22092262	.|.	.|.	.|.	.|.	.|.	.|.	.|.	.|.	.|.	.|.	.|.	.|.	.|.	.|.	.|.	.|.	.|.	.|.	.|.	.|.	.|.	.|.	.|.	.|.	.|.	.|.	.|.	.|.	.|.	.|.	.|.	.|.	.|.	.|.	.|.	.|.	.|.	.|.	.|.	.|.	.|.	.|.	.|.	.|.	.|.	.|.	.|.	.|.	.|.
chr15:22511806-22511846	.|.	.|.	.|.	.|.	.|.	.|.	.|.	.|.	.|.	.|.	.|.	.|.	.|.	36|38	.|.	.|.	.|.	.|.	.|.	.|.	.|.	.|.	.|.	30|34	.|.	.|.	.|.	.|.	.|.	.|.	.|.	.|.	.|.	.|.	.|.	.|.	.|.	34|38	.|.	.|.	.|.	.|.	.|.	.|.	.|.	.|.	.|.	.|.	.|.
chr15:22512143-22512177	.|.	.|.	30|32	.|.	32|32	32|32	.|.	30|32	.|.	.|.	.|.	30|32	32|32	.|.	32|32	34|34	34|34	34|34	.|.	30|32	34|34	.|.	.|.	.|.	32|32	.|.	30|32	28|32	32|32	.|.	.|.	30|32	34|32	32|32	.|.	30|32	28|30	34|30	34|30	.|.	34|32	34|34	34|32	34|30	.|.	34|32	28|30	34|30	.|.
chr15:22512378-22512412	28|32	.|.	40|36	40|38	.|.	32|36	.|.	30|40	40|36	30|38	40|36	.|.	.|.	.|.	.|.	38|36	.|.	32|32	.|.	32|36	.|.	.|.	38|36	.|.	30|32	36|36	38|36	32|36	38|36	32|32	32|32	.|.	32|38	38|34	.|.	30|32	32|32	.|.	32|32	.|.	32|32	32|32	32|38	38|36	.|.	30|38	38|36	.|.	.|.
chr15:23175433-23175461	.|.	.|.	.|.	.|.	.|.	.|.	.|.	.|.	.|.	.|.	.|.	.|.	.|.	.|.	.|.	.|.	.|.	.|.	.|.	.|.	.|.	.|.	.|.	.|.	.|.	.|.	.|.	.|.	.|.	.|.	.|.	.|.	.|.	.|.	.|.	.|.	.|.	28|28	.|.	.|.	.|.	.|.	28|28	.|.	.|.	.|.	.|.	.|.	.|.
chr15:25140547-25140587	32|38	32|36	36|38	.|.	.|.	.|.	34|34	34|34	34|34	34|34	38|38	.|.	.|.	38|38	.|.	.|.	.|.	.|.	.|.	34|38	.|.	32|34	38|38	36|38	36|38	.|.	34|38	.|.	36|38	.|.	34|38	.|.	.|.	.|.	.|.	34|38	36|38	38|38	36|36	.|.	36|38	.|.	34|38	36|36	.|.	40|38	36|38	.|.	34|38
chr15:25680116-25680166	.|.	.|.	.|.	.|.	.|.	.|.	.|.	.|.	.|.	.|.	.|.	.|.	.|.	.|.	.|.	.|.	52|54	.|.	.|.	50|54	.|.	.|.	.|.	.|.	.|.	.|.	42|42	.|.	.|.	.|.	50|54	.|.	.|.	42|42	42|42	.|.	.|.	.|.	.|.	52|54	.|.	.|.	.|.	.|.	.|.	.|.	.|.	42|42	50|52
chr15:25960112-25960148	.|.	.|.	.|.	.|.	.|.	.|.	.|.	.|.	.|.	.|.	.|.	.|.	.|.	.|.	.|.	.|.	.|.	.|.	.|.	.|.	.|.	.|.	.|.	.|.	.|.	.|.	.|.	.|.	.|.	.|.	.|.	.|.	.|.	.|.	.|.	.|.	.|.	.|.	.|.	.|.	.|.	.|.	.|.	.|.	.|.	.|.	.|.	.|.	.|.
chr15:26119924-26119960	.|.	24|24	.|.	.|.	.|.	.|.	.|.	.|.	24|24	.|.	.|.	24|24	.|.	.|.	.|.	.|.	.|.	.|.	.|.	.|.	.|.	.|.	.|.	.|.	.|.	.|.	.|.	.|.	.|.	34|40	.|.	.|.	.|.	.|.	.|.	.|.	.|.	.|.	.|.	.|.	.|.	.|.	.|.	.|.	.|.	.|.	.|.	.|.	.|.
chr15:27008754-27008786	.|.	26|28	.|.	.|.	.|.	.|.	.|.	.|.	.|.	.|.	.|.	.|.	.|.	.|.	.|.	.|.	.|.	.|.	.|.	.|.	.|.	.|.	.|.	.|.	.|.	.|.	.|.	.|.	.|.	.|.	.|.	.|.	.|.	.|.	.|.	.|.	.|.	.|.	.|.	.|.	.|.	.|.	.|.	.|.	.|.	.|.	.|.	26|28	.|.
chr15:27165327-27165351	.|.	.|.	.|.	.|.	24|24	.|.	.|.	.|.	.|.	.|.	.|.	.|.	.|.	.|.	.|.	.|.	.|.	.|.	.|.	.|.	24|24	.|.	.|.	.|.	.|.	.|.	.|.	.|.	.|.	.|.	.|.	.|.	.|.	.|.	.|.	.|.	.|.	.|.	.|.	.|.	.|.	.|.	.|.	.|.	24|24	.|.	.|.	.|.	.|.
chr15:27856792-27856820	.|.	.|.	.|.	.|.	.|.	.|.	.|.	.|.	.|.	30|30	.|.	34|34	.|.	.|.	.|.	.|.	.|.	.|.	.|.	.|.	30|30	.|.	.|.	.|.	.|.	.|.	.|.	30|30	.|.	.|.	.|.	.|.	.|.	.|.	.|.	.|.	30|34	32|34	.|.	.|.	.|.	.|.	.|.	.|.	.|.	.|.	.|.	.|.	.|.
chr15:28962621-28962651	.|.	.|.	.|.	.|.	.|.	.|.	.|.	.|.	.|.	.|.	.|.	.|.	.|.	.|.	.|.	.|.	30|28	.|.	.|.	30|28	.|.	.|.	.|.	.|.	.|.	.|.	.|.	.|.	.|.	.|.	.|.	.|.	.|.	30|30	.|.	.|.	.|.	.|.	30|30	.|.	.|.	.|.	.|.	.|.	.|.	.|.	.|.	.|.	.|.
chr15:29298067-29298095	.|.	.|.	.|.	.|.	.|.	.|.	.|.	.|.	.|.	.|.	.|.	.|.	.|.	.|.	.|.	.|.	.|.	.|.	28|28	.|.	.|.	.|.	28|28	.|.	28|28	.|.	.|.	.|.	.|.	28|28	.|.	.|.	.|.	28|28	.|.	.|.	.|.	.|.	.|.	.|.	.|.	.|.	.|.	.|.	.|.	.|.	.|.	.|.	.|.
chr15:29322932-29322966	.|.	30|30	40|42	.|.	.|.	.|.	.|.	.|.	.|.	.|.	.|.	.|.	.|.	.|.	.|.	.|.	.|.	.|.	.|.	.|.	.|.	.|.	.|.	.|.	38|40	.|.	.|.	.|.	.|.	.|.	.|.	.|.	.|.	.|.	.|.	.|.	.|.	.|.	.|.	.|.	.|.	.|.	.|.	.|.	.|.	.|.	.|.	.|.	.|.
chr15:29347871-29347915	.|.	.|.	.|.	.|.	.|.	42|42	.|.	38|40	.|.	.|.	.|.	.|.	.|.	.|.	.|.	.|.	.|.	.|.	.|.	.|.	.|.	.|.	.|.	.|.	.|.	.|.	.|.	.|.	44|40	.|.	.|.	.|.	.|.	.|.	.|.	.|.	.|.	.|.	.|.	.|.	.|.	.|.	.|.	.|.	.|.	.|.	44|40	.|.	.|.
chr15:29859050-29859080	40|42	.|.	.|.	.|.	44|46	.|.	.|.	.|.	.|.	.|.	40|42	.|.	.|.	30|28	.|.	.|.	.|.	.|.	.|.	38|40	.|.	.|.	30|28	.|.	30|28	30|28	30|40	.|.	30|28	.|.	.|.	.|.	.|.	40|42	.|.	.|.	.|.	.|.	.|.	.|.	30|28	.|.	.|.	.|.	.|.	40|42	.|.	30|28	.|.
chr15:31260737-31260779	.|.	48|50	.|.	.|.	.|.	.|.	.|.	.|.	.|.	.|.	.|.	.|.	.|.	.|.	.|.	.|.	.|.	.|.	.|.	.|.	.|.	.|.	.|.	.|.	44|46	.|.	.|.	.|.	48|50	.|.	.|.	.|.	.|.	.|.	.|.	.|.	.|.	.|.	.|.	.|.	.|.	.|.	46|48	.|.	.|.	.|.	.|.	.|.	.|.
chr15:31309165-31309191	.|.	.|.	.|.	.|.	.|.	.|.	.|.	.|.	.|.	.|.	.|.	.|.	.|.	.|.	.|.	.|.	.|.	.|.	.|.	.|.	.|.	.|.	.|.	.|.	.|.	.|.	.|.	.|.	.|.	.|.	.|.	.|.	.|.	.|.	.|.	.|.	.|.	.|.	.|.	.|.	.|.	.|.	.|.	.|.	.|.	.|.	.|.	.|.	.|.
chr15:31955449-31955485	36|28	36|28	.|.	28|28	.|.	.|.	28|28	.|.	.|.	28|28	.|.	.|.	.|.	.|.	.|.	.|.	.|.	.|.	.|.	.|.	.|.	.|.	.|.	.|.	28|28	.|.	.|.	.|.	34|38	.|.	28|28	.|.	28|28	.|.	.|.	.|.	34|38	.|.	26|28	34|38	.|.	34|38	36|36	28|28	28|28	.|.	.|.	.|.	.|.
chr15:32176930-32176960	.|.	.|.	.|.	.|.	.|.	.|.	.|.	.|.	.|.	.|.	.|.	.|.	.|.	.|.	.|.	.|.	.|.	.|.	.|.	.|.	.|.	.|.	.|.	.|.	.|.	.|.	.|.	.|.	.|.	.|.	.|.	.|.	.|.	.|.	.|.	.|.	.|.	.|.	.|.	30|30	.|.	.|.	.|.	.|.	.|.	.|.	.|.	.|.	.|.
chr15:33076615-33076645	.|.	25|25	.|.	.|.	.|.	.|.	.|.	.|.	.|.	.|.	.|.	25|25	.|.	.|.	.|.	25|25	.|.	.|.	.|.	.|.	.|.	.|.	.|.	.|.	.|.	.|.	.|.	.|.	.|.	25|25	.|.	.|.	.|.	.|.	.|.	.|.	.|.	.|.	.|.	.|.	25|25	.|.	.|.	.|.	.|.	.|.	.|.	.|.	.|.
chr15:33318297-33318333	30|30	28|30	.|.	.|.	30|30	22|22	.|.	30|30	.|.	30|30	.|.	.|.	.|.	.|.	.|.	.|.	.|.	.|.	.|.	30|30	.|.	.|.	.|.	.|.	.|.	.|.	.|.	.|.	24|30	.|.	.|.	.|.	30|30	30|30	.|.	.|.	.|.	.|.	.|.	.|.	22|24	.|.	.|.	.|.	.|.	.|.	22|22	30|30	30|30
chr15:34563803-34563829	.|.	.|.	.|.	.|.	.|.	.|.	.|.	.|.	22|22	.|.	22|22	.|.	.|.	22|22	28|30	.|.	.|.	.|.	.|.	28|30	22|22	30|30	.|.	28|30	20|22	22|22	.|.	.|.	28|30	22|22	28|30	.|.	22|30	.|.	.|.	22|30	22|22	28|30	28|30	.|.	22|30	22|22	22|22	.|.	20|20	28|30	.|.	.|.	.|.
chr15:34869708-34869760	.|.	.|.	.|.	.|.	.|.	.|.	.|.	.|.	.|.	.|.	.|.	42|40	.|.	.|.	.|.	.|.	.|.	.|.	.|.	42|40	.|.	.|.	.|.	44|40	.|.	.|.	.|.	42|40	.|.	.|.	.|.	.|.	.|.	.|.	.|.	.|.	.|.	.|.	.|.	.|.	.|.	.|.	.|.	.|.	.|.	.|.	.|.	42|40	.|.
chr15:35865342-35865386	.|.	.|.	.|.	.|.	.|.	.|.	.|.	36|38	.|.	.|.	.|.	.|.	.|.	.|.	36|38	.|.	.|.	.|.	.|.	.|.	.|.	.|.	40|42	.|.	.|.	.|.	.|.	.|.	.|.	.|.	.|.	.|.	.|.	.|.	.|.	.|.	.|.	.|.	.|.	.|.	.|.	.|.	.|.	.|.	.|.	40|42	.|.	.|.	.|.
chr15:36249906-36249952	.|.	.|.	.|.	.|.	34|38	.|.	.|.	.|.	.|.	.|.	.|.	38|32	34|38	.|.	.|.	38|32	.|.	26|28	.|.	38|30	34|38	34|38	.|.	.|.	.|.	26|28	.|.	.|.	34|38	.|.	.|.	.|.	.|.	34|38	.|.	.|.	38|32	.|.	34|38	.|.	.|.	28|28	38|30	38|32	.|.	38|30	.|.	40|28	.|.
chr15:36630015-36630059	.|.	.|.	.|.	.|.	.|.	.|.	.|.	.|.	.|.	.|.	.|.	.|.	.|.	.|.	.|.	.|.	.|.	.|.	.|.	.|.	.|.	.|.	.|.	.|.	24|24	.|.	.|.	.|.	.|.	.|.	.|.	.|.	.|.	.|.	.|.	.|.	.|.	.|.	.|.	.|.	24|24	.|.	.|.	24|24	.|.	.|.	.|.	.|.	.|.
chr15:36896619-36896657	.|.	.|.	.|.	.|.	.|.	38|34	.|.	36|32	.|.	36|32	.|.	.|.	.|.	.|.	.|.	36|32	.|.	.|.	36|32	.|.	.|.	.|.	36|32	.|.	.|.	.|.	38|34	.|.	.|.	.|.	.|.	.|.	.|.	.|.	.|.	.|.	.|.	.|.	.|.	.|.	.|.	38|32	.|.	36|32	.|.	.|.	.|.	.|.	.|.
chr15:37015156-37015186	.|.	.|.	.|.	.|.	.|.	.|.	.|.	.|.	.|.	.|.	.|.	.|.	.|.	.|.	.|.	.|.	.|.	.|.	.|.	.|.	.|.	.|.	.|.	.|.	.|.	.|.	.|.	.|.	.|.	.|.	.|.	.|.	.|.	.|.	.|.	.|.	.|.	.|.	.|.	.|.	.|.	.|.	.|.	.|.	.|.	.|.	.|.	.|.	.|.
chr15:37038870-37038898	26|26	26|30	26|26	.|.	30|30	.|.	30|30	26|30	30|30	26|26	.|.	26|26	.|.	.|.	.|.	.|.	.|.	.|.	.|.	26|30	.|.	26|26	.|.	26|26	26|30	26|26	26|26	30|30	30|30	.|.	26|30	26|26	26|26	26|26	.|.	28|26	26|26	28|28	26|30	30|30	30|30	26|30	26|30	26|26	30|30	26|26	26|30	28|30	.|.
chr15:37323622-37323648	.|.	.|.	.|.	.|.	.|.	.|.	.|.	.|.	.|.	.|.	.|.	.|.	.|.	.|.	.|.	.|.	.|.	.|.	.|.	.|.	.|.	.|.	.|.	.|.	.|.	.|.	.|.	.|.	.|.	.|.	.|.	.|.	.|.	.|.	.|.	.|.	.|.	.|.	.|.	36|36	.|.	34|36	.|.	.|.	.|.	.|.	.|.	.|.	.|.
chr15:37346611-37346636	25|25	25|25	.|.	.|.	.|.	.|.	.|.	.|.	.|.	.|.	.|.	.|.	.|.	25|25	25|25	.|.	.|.	.|.	.|.	25|25	.|.	.|.	.|.	.|.	.|.	.|.	.|.	.|.	.|.	.|.	25|25	.|.	.|.	.|.	25|25	.|.	.|.	.|.	.|.	25|25	25|25	.|.	.|.	25|25	.|.	.|.	25|25	25|25	.|.
chr15:37398509-37398536	.|.	.|.	.|.	.|.	.|.	.|.	.|.	27|27	27|27	.|.	27|27	.|.	27|27	27|27	27|27	.|.	.|.	.|.	.|.	.|.	27|27	27|27	27|27	.|.	27|27	.|.	27|27	.|.	.|.	.|.	27|27	27|27	27|27	27|27	.|.	27|27	27|27	.|.	27|27	.|.	27|27	27|27	27|27	27|27	.|.	27|27	.|.	27|27	27|27
chr15:37462019-37462057	.|.	.|.	.|.	.|.	.|.	.|.	.|.	.|.	.|.	.|.	.|.	.|.	.|.	.|.	.|.	.|.	.|.	.|.	.|.	.|.	.|.	.|.	.|.	.|.	.|.	40|42	.|.	.|.	38|36	.|.	.|.	.|.	.|.	.|.	.|.	.|.	.|.	.|.	.|.	.|.	30|30	30|30	.|.	.|.	.|.	.|.	.|.	30|30	.|.
chr15:37649693-37649719	22|24	24|32	.|.	28|30	24|32	24|32	.|.	24|32	22|24	30|32	.|.	24|32	.|.	30|32	.|.	24|30	.|.	.|.	.|.	24|32	.|.	24|32	24|24	22|24	24|30	24|32	24|32	30|34	24|30	30|32	24|32	28|32	24|30	22|24	30|32	24|32	22|24	22|24	24|30	22|24	22|24	24|30	30|32	26|24	22|24	24|30	24|30	30|32	22|24
chr15:37894880-37894912	.|.	.|.	.|.	.|.	30|32	20|22	.|.	30|32	.|.	.|.	.|.	.|.	.|.	.|.	.|.	.|.	.|.	30|32	.|.	20|22	.|.	.|.	.|.	.|.	.|.	.|.	20|22	.|.	32|22	.|.	18|22	.|.	28|32	.|.	.|.	20|22	.|.	20|22	.|.	.|.	28|32	28|32	.|.	.|.	.|.	.|.	.|.	.|.	22|22
chr15:38358726-38358764	.|.	.|.	.|.	.|.	.|.	.|.	.|.	38|36	.|.	.|.	.|.	.|.	.|.	.|.	.|.	.|.	.|.	.|.	.|.	.|.	.|.	.|.	36|40	.|.	.|.	38|40	38|40	.|.	38|40	.|.	.|.	.|.	.|.	.|.	38|40	.|.	.|.	36|42	.|.	.|.	42|42	.|.	.|.	.|.	.|.	.|.	.|.	.|.	.|.
chr15:39669067-39669099	.|.	.|.	.|.	.|.	.|.	.|.	.|.	.|.	32|30	.|.	.|.	.|.	.|.	.|.	.|.	.|.	.|.	.|.	.|.	.|.	.|.	.|.	.|.	.|.	.|.	.|.	32|30	.|.	.|.	.|.	32|36	.|.	.|.	.|.	.|.	.|.	32|30	.|.	.|.	.|.	.|.	.|.	.|.	.|.	.|.	.|.	.|.	.|.	.|.
chr15:42587837-42587885	.|.	.|.	.|.	.|.	.|.	.|.	.|.	.|.	.|.	.|.	.|.	.|.	.|.	.|.	.|.	30|34	.|.	.|.	.|.	.|.	.|.	.|.	.|.	.|.	.|.	.|.	.|.	.|.	.|.	.|.	.|.	.|.	.|.	.|.	.|.	.|.	.|.	.|.	.|.	.|.	.|.	.|.	.|.	.|.	.|.	.|.	.|.	30|34	.|.
chr15:42857585-42857629	.|.	.|.	.|.	.|.	.|.	.|.	.|.	.|.	.|.	.|.	.|.	.|.	.|.	.|.	.|.	.|.	.|.	.|.	.|.	38|40	.|.	.|.	.|.	30|30	38|40	.|.	.|.	.|.	.|.	.|.	.|.	.|.	.|.	.|.	.|.	.|.	.|.	.|.	30|30	40|40	.|.	.|.	.|.	.|.	.|.	.|.	.|.	.|.	.|.
chr15:43773658-43773690	.|.	.|.	.|.	.|.	.|.	.|.	.|.	.|.	.|.	.|.	.|.	.|.	.|.	.|.	.|.	.|.	.|.	.|.	.|.	.|.	.|.	.|.	.|.	.|.	.|.	.|.	.|.	.|.	.|.	.|.	.|.	.|.	.|.	.|.	.|.	.|.	.|.	.|.	.|.	.|.	.|.	.|.	.|.	.|.	.|.	.|.	.|.	.|.	.|.
chr15:43775431-43775469	.|.	.|.	.|.	.|.	.|.	.|.	46|50	.|.	.|.	.|.	.|.	.|.	.|.	.|.	.|.	.|.	.|.	.|.	.|.	42|44	.|.	.|.	.|.	.|.	.|.	.|.	.|.	.|.	.|.	.|.	.|.	.|.	.|.	.|.	.|.	.|.	.|.	.|.	.|.	44|48	.|.	.|.	.|.	.|.	.|.	42|44	.|.	.|.	.|.
chr15:44431496-44431528	.|.	.|.	.|.	.|.	.|.	.|.	.|.	.|.	.|.	.|.	.|.	36|40	.|.	.|.	.|.	.|.	.|.	.|.	.|.	.|.	.|.	.|.	.|.	.|.	.|.	.|.	.|.	.|.	.|.	.|.	.|.	.|.	.|.	.|.	.|.	.|.	.|.	.|.	.|.	.|.	.|.	.|.	.|.	.|.	.|.	.|.	.|.	.|.	.|.
chr15:44514132-44514166	.|.	.|.	.|.	.|.	.|.	.|.	.|.	.|.	.|.	.|.	.|.	.|.	.|.	.|.	.|.	.|.	.|.	.|.	.|.	.|.	.|.	28|28	.|.	.|.	.|.	.|.	.|.	.|.	.|.	.|.	.|.	.|.	.|.	.|.	.|.	.|.	.|.	.|.	.|.	.|.	.|.	.|.	.|.	.|.	.|.	.|.	.|.	.|.	.|.
chr15:45038948-45038976	.|.	.|.	.|.	22|24	.|.	.|.	.|.	.|.	.|.	.|.	.|.	.|.	.|.	20|22	.|.	.|.	.|.	.|.	.|.	.|.	.|.	.|.	.|.	.|.	.|.	.|.	.|.	.|.	22|24	.|.	22|24	.|.	.|.	.|.	.|.	.|.	22|22	.|.	.|.	.|.	.|.	.|.	.|.	.|.	.|.	.|.	.|.	.|.	.|.
chr15:45871868-45871910	.|.	.|.	.|.	.|.	.|.	.|.	.|.	.|.	.|.	.|.	.|.	.|.	.|.	36|40	.|.	.|.	.|.	.|.	.|.	.|.	.|.	.|.	.|.	.|.	.|.	.|.	.|.	.|.	.|.	.|.	.|.	.|.	.|.	.|.	.|.	.|.	.|.	.|.	.|.	.|.	.|.	.|.	.|.	.|.	.|.	.|.	.|.	.|.	.|.
chr15:46092906-46092952	.|.	.|.	.|.	.|.	.|.	.|.	.|.	.|.	.|.	.|.	.|.	.|.	.|.	.|.	.|.	.|.	.|.	.|.	.|.	.|.	.|.	.|.	.|.	.|.	.|.	.|.	.|.	.|.	.|.	.|.	.|.	.|.	.|.	.|.	.|.	.|.	.|.	.|.	.|.	.|.	.|.	.|.	.|.	.|.	.|.	.|.	.|.	.|.	.|.
chr15:46771368-46771396	.|.	.|.	.|.	.|.	.|.	.|.	.|.	.|.	.|.	.|.	.|.	.|.	.|.	.|.	.|.	.|.	.|.	.|.	.|.	.|.	.|.	.|.	36|36	.|.	.|.	34|36	.|.	.|.	34|38	.|.	.|.	.|.	.|.	36|40	.|.	.|.	.|.	.|.	.|.	.|.	.|.	.|.	.|.	.|.	.|.	.|.	.|.	.|.	.|.
chr15:47524723-47524753	.|.	.|.	.|.	.|.	.|.	.|.	.|.	30|30	.|.	.|.	.|.	24|24	.|.	.|.	.|.	.|.	.|.	.|.	.|.	.|.	.|.	30|30	.|.	24|24	.|.	.|.	.|.	.|.	30|30	.|.	24|24	.|.	.|.	.|.	.|.	30|24	.|.	.|.	.|.	.|.	30|30	.|.	.|.	.|.	.|.	.|.	.|.	.|.	.|.
chr15:47659889-47659925	.|.	.|.	.|.	.|.	.|.	.|.	.|.	.|.	28|28	.|.	.|.	.|.	.|.	.|.	.|.	.|.	.|.	.|.	.|.	.|.	.|.	22|26	28|28	.|.	28|28	.|.	.|.	.|.	.|.	.|.	.|.	.|.	.|.	.|.	.|.	28|28	28|28	.|.	.|.	.|.	.|.	.|.	.|.	.|.	.|.	.|.	.|.	.|.	.|.
chr15:47714377-47714429	.|.	40|40	.|.	.|.	60|60	.|.	.|.	.|.	.|.	.|.	.|.	.|.	40|40	.|.	.|.	.|.	.|.	.|.	.|.	.|.	.|.	.|.	.|.	.|.	40|40	.|.	36|40	.|.	60|60	.|.	.|.	.|.	.|.	.|.	.|.	.|.	.|.	40|40	.|.	.|.	60|60	.|.	.|.	.|.	.|.	.|.	40|40	.|.	40|52
chr15:48452683-48452715	.|.	.|.	.|.	.|.	.|.	.|.	.|.	.|.	.|.	.|.	.|.	.|.	.|.	.|.	.|.	.|.	40|42	.|.	.|.	.|.	.|.	.|.	.|.	.|.	36|38	.|.	.|.	.|.	.|.	.|.	.|.	.|.	.|.	.|.	.|.	.|.	.|.	.|.	.|.	.|.	.|.	.|.	.|.	.|.	.|.	.|.	.|.	.|.	.|.
chr15:48528289-48528331	34|34	.|.	.|.	.|.	.|.	.|.	.|.	.|.	.|.	.|.	.|.	32|34	.|.	.|.	42|46	.|.	.|.	.|.	.|.	34|46	.|.	.|.	.|.	.|.	46|48	.|.	.|.	.|.	.|.	.|.	46|48	.|.	.|.	.|.	.|.	46|48	.|.	.|.	48|50	.|.	46|48	.|.	.|.	.|.	44|48	.|.	.|.	.|.	.|.
chr15:48843159-48843187	.|.	28|28	.|.	.|.	.|.	.|.	.|.	.|.	.|.	.|.	.|.	.|.	.|.	.|.	.|.	.|.	.|.	.|.	.|.	.|.	.|.	.|.	.|.	.|.	36|36	.|.	.|.	.|.	.|.	.|.	.|.	.|.	.|.	.|.	.|.	.|.	.|.	.|.	.|.	.|.	.|.	.|.	.|.	.|.	28|28	.|.	.|.	.|.	.|.
chr15:49088486-49088520	.|.	.|.	.|.	30|30	.|.	.|.	.|.	.|.	.|.	.|.	.|.	.|.	.|.	.|.	.|.	30|30	.|.	.|.	.|.	50|52	.|.	.|.	.|.	.|.	.|.	.|.	.|.	.|.	.|.	.|.	.|.	.|.	.|.	50|52	.|.	.|.	.|.	.|.	.|.	.|.	.|.	.|.	.|.	.|.	.|.	.|.	.|.	.|.	.|.
chr15:49151503-49151539	.|.	.|.	.|.	.|.	.|.	.|.	.|.	.|.	.|.	.|.	.|.	.|.	.|.	.|.	.|.	38|42	.|.	.|.	.|.	.|.	.|.	36|38	.|.	.|.	.|.	36|34	34|38	.|.	.|.	.|.	.|.	.|.	.|.	.|.	.|.	.|.	36|34	.|.	.|.	.|.	.|.	.|.	.|.	.|.	.|.	.|.	.|.	.|.	.|.
chr15:49189953-49189981	.|.	32|34	.|.	.|.	.|.	.|.	.|.	.|.	.|.	.|.	.|.	.|.	.|.	.|.	.|.	.|.	28|26	32|34	.|.	28|34	28|28	.|.	.|.	.|.	34|34	.|.	.|.	28|28	.|.	.|.	.|.	.|.	.|.	32|34	.|.	26|26	.|.	.|.	.|.	.|.	.|.	32|34	.|.	.|.	.|.	.|.	28|30	.|.	.|.
chr15:49209440-49209488	.|.	.|.	.|.	.|.	.|.	.|.	.|.	.|.	.|.	.|.	.|.	.|.	.|.	.|.	.|.	.|.	.|.	.|.	.|.	.|.	.|.	.|.	.|.	.|.	.|.	.|.	.|.	.|.	.|.	.|.	.|.	.|.	.|.	.|.	.|.	.|.	38|38	.|.	.|.	.|.	.|.	.|.	.|.	.|.	.|.	.|.	.|.	.|.	.|.
chr15:49348508-49348546	.|.	.|.	.|.	.|.	.|.	.|.	.|.	.|.	.|.	50|52	.|.	.|.	.|.	.|.	.|.	.|.	.|.	.|.	.|.	.|.	.|.	.|.	66|66	.|.	50|52	.|.	.|.	.|.	.|.	.|.	.|.	52|52	.|.	.|.	.|.	.|.	.|.	.|.	.|.	.|.	.|.	.|.	.|.	.|.	.|.	.|.	.|.	.|.	.|.
chr15:52172053-52172085	.|.	.|.	.|.	.|.	.|.	.|.	.|.	.|.	.|.	.|.	.|.	.|.	.|.	.|.	.|.	.|.	.|.	.|.	.|.	.|.	.|.	.|.	.|.	.|.	.|.	.|.	.|.	.|.	46|46	.|.	.|.	.|.	.|.	.|.	44|46	.|.	.|.	.|.	.|.	.|.	.|.	44|46	.|.	.|.	44|46	.|.	.|.	.|.	.|.
chr15:52193769-52193809	42|42	.|.	40|40	.|.	.|.	.|.	.|.	.|.	.|.	.|.	.|.	.|.	.|.	.|.	42|42	.|.	.|.	.|.	.|.	42|48	.|.	.|.	38|38	46|46	.|.	40|40	.|.	.|.	.|.	.|.	40|40	.|.	.|.	.|.	.|.	.|.	.|.	.|.	46|46	.|.	40|42	.|.	44|44	.|.	.|.	44|44	.|.	40|40	.|.
chr15:52358960-52358990	32|32	30|30	.|.	.|.	.|.	30|30	32|32	32|32	.|.	30|30	.|.	32|32	.|.	.|.	.|.	.|.	30|32	.|.	.|.	30|32	.|.	.|.	32|32	30|30	34|34	.|.	30|32	.|.	30|30	.|.	32|32	.|.	30|32	.|.	.|.	.|.	30|30	32|32	30|32	30|30	28|32	30|30	.|.	30|32	.|.	30|32	30|30	.|.	30|32
chr15:53143480-53143512	.|.	.|.	.|.	.|.	.|.	.|.	.|.	24|26	.|.	.|.	.|.	.|.	.|.	.|.	.|.	.|.	.|.	.|.	26|26	.|.	.|.	26|26	34|38	.|.	.|.	.|.	.|.	.|.	36|38	.|.	.|.	.|.	.|.	.|.	.|.	.|.	.|.	.|.	.|.	.|.	.|.	.|.	.|.	.|.	.|.	.|.	34|36	.|.	.|.
chr15:53262329-53262357	28|36	28|36	.|.	28|28	36|36	36|36	28|36	28|36	28|36	28|36	.|.	28|28	28|36	36|36	.|.	.|.	28|36	.|.	28|28	28|36	.|.	36|36	36|36	36|36	28|36	28|36	36|36	28|36	28|36	.|.	36|36	.|.	28|28	28|36	28|36	28|28	36|36	28|36	28|36	28|28	28|36	36|36	36|36	28|36	28|28	36|36	36|36	28|28	28|36
chr15:53516556-53516580	24|24	24|24	.|.	.|.	.|.	24|24	24|24	24|24	.|.	24|22	.|.	.|.	.|.	.|.	24|24	22|22	.|.	.|.	20|22	22|22	.|.	.|.	24|24	.|.	22|22	24|24	24|22	.|.	.|.	.|.	24|24	.|.	.|.	.|.	.|.	24|22	.|.	.|.	.|.	24|24	22|22	24|22	.|.	.|.	.|.	22|22	.|.	.|.	.|.
chr15:53538428-53538464	.|.	.|.	.|.	.|.	.|.	.|.	.|.	26|28	32|32	32|32	.|.	26|28	.|.	.|.	28|32	.|.	.|.	32|32	.|.	28|32	.|.	28|28	.|.	.|.	.|.	28|32	.|.	.|.	28|32	.|.	.|.	.|.	26|28	.|.	.|.	.|.	.|.	.|.	28|28	28|28	28|28	.|.	.|.	.|.	.|.	.|.	28|30	28|28	30|32
chr15:53911461-53911489	.|.	.|.	.|.	.|.	.|.	.|.	.|.	.|.	.|.	.|.	.|.	.|.	.|.	.|.	.|.	.|.	.|.	.|.	.|.	22|22	.|.	24|24	.|.	.|.	.|.	.|.	.|.	.|.	.|.	.|.	.|.	.|.	.|.	.|.	38|38	.|.	.|.	.|.	.|.	.|.	.|.	.|.	.|.	.|.	.|.	24|34	.|.	.|.	.|.
chr15:54107733-54107760	.|.	.|.	.|.	.|.	.|.	.|.	.|.	.|.	.|.	.|.	.|.	.|.	.|.	.|.	.|.	.|.	.|.	.|.	.|.	.|.	.|.	.|.	.|.	27|27	.|.	.|.	.|.	.|.	.|.	.|.	.|.	.|.	.|.	.|.	.|.	.|.	.|.	.|.	.|.	.|.	.|.	.|.	.|.	.|.	.|.	.|.	.|.	.|.	.|.
chr15:54426246-54426270	.|.	.|.	.|.	.|.	.|.	.|.	.|.	.|.	28|30	.|.	.|.	.|.	.|.	.|.	.|.	.|.	.|.	.|.	.|.	.|.	.|.	.|.	.|.	.|.	.|.	.|.	.|.	.|.	.|.	.|.	.|.	.|.	.|.	.|.	.|.	.|.	.|.	.|.	.|.	.|.	.|.	.|.	22|22	.|.	.|.	.|.	.|.	.|.	.|.
chr15:54575908-54575936	.|.	.|.	.|.	.|.	.|.	.|.	.|.	.|.	.|.	.|.	.|.	.|.	.|.	.|.	.|.	.|.	.|.	.|.	.|.	28|22	.|.	.|.	.|.	28|28	.|.	.|.	28|28	.|.	.|.	.|.	.|.	.|.	.|.	.|.	.|.	.|.	.|.	.|.	28|28	.|.	.|.	.|.	.|.	.|.	.|.	.|.	.|.	.|.	.|.
chr15:55030272-55030299	.|.	.|.	.|.	.|.	.|.	.|.	.|.	.|.	.|.	.|.	.|.	.|.	.|.	.|.	.|.	.|.	.|.	.|.	.|.	.|.	.|.	27|27	.|.	.|.	.|.	.|.	.|.	.|.	.|.	.|.	.|.	.|.	.|.	.|.	.|.	.|.	.|.	.|.	.|.	.|.	.|.	.|.	.|.	.|.	.|.	.|.	.|.	.|.	.|.
chr15:55214391-55214431	34|38	.|.	.|.	.|.	38|42	.|.	.|.	34|38	.|.	32|36	.|.	.|.	.|.	.|.	40|38	.|.	.|.	.|.	.|.	40|36	.|.	.|.	40|36	.|.	.|.	40|36	.|.	.|.	.|.	.|.	36|38	.|.	38|42	.|.	.|.	.|.	.|.	.|.	.|.	.|.	.|.	.|.	.|.	.|.	.|.	.|.	38|42	.|.	.|.
chr15:55391248-55391282	.|.	.|.	.|.	26|28	.|.	.|.	.|.	.|.	.|.	.|.	.|.	.|.	.|.	.|.	.|.	.|.	.|.	.|.	.|.	.|.	.|.	.|.	.|.	.|.	.|.	.|.	.|.	.|.	.|.	.|.	.|.	.|.	28|24	.|.	.|.	.|.	.|.	.|.	28|24	.|.	.|.	.|.	.|.	.|.	.|.	.|.	.|.	.|.	.|.
chr15:56289646-56289682	.|.	.|.	.|.	.|.	.|.	.|.	.|.	.|.	.|.	.|.	.|.	.|.	.|.	.|.	.|.	.|.	.|.	.|.	.|.	.|.	.|.	.|.	.|.	.|.	.|.	.|.	.|.	.|.	.|.	.|.	.|.	30|30	.|.	30|30	.|.	28|30	.|.	.|.	.|.	.|.	28|30	30|30	.|.	.|.	.|.	.|.	.|.	30|30	.|.
chr15:56471959-56472011	.|.	.|.	.|.	.|.	.|.	.|.	.|.	.|.	.|.	.|.	.|.	32|32	.|.	.|.	.|.	.|.	40|44	.|.	.|.	42|46	.|.	.|.	.|.	.|.	.|.	.|.	.|.	.|.	.|.	.|.	.|.	.|.	.|.	.|.	.|.	.|.	.|.	.|.	.|.	.|.	.|.	.|.	.|.	.|.	.|.	.|.	.|.	.|.	.|.
chr15:56516665-56516693	.|.	.|.	.|.	.|.	.|.	.|.	28|28	.|.	.|.	.|.	.|.	28|30	.|.	.|.	.|.	.|.	.|.	.|.	30|30	.|.	.|.	.|.	.|.	.|.	.|.	.|.	.|.	.|.	.|.	.|.	.|.	.|.	.|.	.|.	.|.	.|.	.|.	.|.	.|.	.|.	.|.	.|.	.|.	.|.	.|.	28|24	.|.	.|.	.|.
chr15:57314252-57314276	.|.	.|.	.|.	.|.	.|.	.|.	.|.	.|.	.|.	.|.	.|.	.|.	.|.	.|.	24|24	.|.	.|.	.|.	.|.	.|.	.|.	.|.	.|.	.|.	.|.	.|.	.|.	.|.	.|.	.|.	.|.	.|.	.|.	.|.	.|.	.|.	.|.	.|.	.|.	.|.	.|.	.|.	.|.	.|.	.|.	.|.	.|.	.|.	.|.
chr15:58513416-58513460	.|.	.|.	.|.	.|.	.|.	.|.	.|.	.|.	.|.	.|.	.|.	.|.	.|.	.|.	.|.	.|.	.|.	.|.	.|.	.|.	.|.	.|.	.|.	.|.	.|.	.|.	.|.	.|.	26|26	.|.	.|.	.|.	.|.	.|.	.|.	.|.	.|.	.|.	.|.	.|.	.|.	.|.	.|.	26|26	.|.	.|.	.|.	26|26	.|.
chr15:59200201-59200235	.|.	.|.	.|.	.|.	.|.	.|.	.|.	.|.	.|.	.|.	.|.	34|30	.|.	.|.	.|.	.|.	.|.	.|.	.|.	.|.	.|.	.|.	.|.	.|.	.|.	.|.	.|.	.|.	.|.	30|32	.|.	.|.	.|.	.|.	.|.	.|.	.|.	.|.	32|32	.|.	.|.	.|.	.|.	.|.	.|.	.|.	.|.	.|.	.|.
chr15:59239125-59239153	.|.	.|.	.|.	.|.	.|.	.|.	.|.	.|.	.|.	.|.	.|.	.|.	.|.	.|.	.|.	.|.	.|.	.|.	.|.	.|.	.|.	.|.	.|.	.|.	.|.	.|.	.|.	.|.	.|.	.|.	26|26	.|.	.|.	28|30	.|.	.|.	.|.	.|.	.|.	.|.	.|.	.|.	.|.	.|.	.|.	.|.	.|.	.|.	.|.
chr15:59819533-59819563	30|30	30|30	.|.	.|.	.|.	.|.	.|.	.|.	30|30	.|.	.|.	30|30	.|.	.|.	.|.	.|.	.|.	.|.	.|.	30|30	.|.	.|.	.|.	.|.	.|.	30|30	30|30	.|.	.|.	.|.	.|.	.|.	30|30	.|.	.|.	.|.	.|.	.|.	30|30	30|30	30|30	.|.	.|.	30|30	30|30	30|30	.|.	.|.	.|.
chr15:60038093-60038119	.|.	.|.	.|.	26|24	.|.	.|.	.|.	.|.	.|.	.|.	.|.	.|.	.|.	.|.	.|.	.|.	.|.	.|.	.|.	.|.	.|.	.|.	.|.	.|.	.|.	.|.	.|.	.|.	.|.	.|.	.|.	26|24	.|.	.|.	26|26	.|.	.|.	.|.	.|.	.|.	.|.	.|.	.|.	.|.	.|.	.|.	.|.	.|.	.|.
chr15:60330831-60330867	30|32	.|.	.|.	.|.	.|.	.|.	30|32	.|.	.|.	.|.	.|.	.|.	.|.	.|.	.|.	.|.	.|.	.|.	.|.	32|46	.|.	.|.	44|46	.|.	30|32	32|46	44|46	.|.	44|46	.|.	.|.	.|.	32|32	.|.	.|.	.|.	.|.	.|.	.|.	32|32	.|.	.|.	.|.	44|46	.|.	.|.	46|46	.|.	.|.
chr15:60831198-60831224	.|.	.|.	.|.	.|.	.|.	.|.	.|.	.|.	.|.	.|.	.|.	.|.	.|.	.|.	.|.	34|34	.|.	.|.	.|.	.|.	.|.	.|.	.|.	.|.	.|.	.|.	.|.	30|34	.|.	.|.	.|.	.|.	.|.	.|.	.|.	.|.	.|.	.|.	.|.	.|.	.|.	.|.	.|.	.|.	.|.	.|.	.|.	.|.	.|.
chr15:61339797-61339821	.|.	.|.	.|.	.|.	.|.	.|.	.|.	.|.	.|.	.|.	.|.	.|.	.|.	.|.	.|.	.|.	.|.	.|.	.|.	.|.	.|.	.|.	.|.	24|24	.|.	.|.	.|.	24|24	30|30	.|.	.|.	.|.	.|.	.|.	.|.	.|.	.|.	24|30	.|.	.|.	.|.	.|.	.|.	30|30	.|.	.|.	.|.	.|.	.|.
chr15:61510374-61510406	.|.	.|.	.|.	.|.	.|.	.|.	.|.	.|.	.|.	.|.	.|.	36|38	.|.	.|.	.|.	.|.	.|.	.|.	.|.	30|30	.|.	.|.	.|.	.|.	34|36	.|.	.|.	.|.	.|.	.|.	.|.	.|.	28|28	28|28	.|.	.|.	.|.	.|.	28|28	.|.	28|36	.|.	.|.	36|36	.|.	.|.	.|.	28|36	.|.
chr15:61795228-61795282	.|.	.|.	.|.	.|.	.|.	.|.	.|.	.|.	.|.	.|.	36|38	.|.	.|.	.|.	.|.	.|.	36|38	.|.	.|.	.|.	.|.	.|.	36|38	.|.	.|.	.|.	.|.	.|.	.|.	.|.	.|.	.|.	.|.	.|.	.|.	.|.	.|.	.|.	.|.	.|.	.|.	.|.	.|.	.|.	.|.	.|.	.|.	.|.	.|.
chr15:62629620-62629648	.|.	.|.	.|.	.|.	.|.	.|.	.|.	.|.	.|.	.|.	.|.	.|.	.|.	.|.	.|.	.|.	.|.	.|.	.|.	.|.	.|.	.|.	.|.	.|.	28|26	.|.	.|.	.|.	.|.	.|.	26|26	.|.	.|.	.|.	.|.	.|.	.|.	.|.	.|.	.|.	.|.	.|.	.|.	.|.	.|.	.|.	.|.	.|.	.|.
chr15:63295739-63295779	.|.	.|.	.|.	.|.	54|58	.|.	.|.	.|.	.|.	.|.	.|.	50|56	56|60	.|.	.|.	.|.	.|.	48|50	.|.	56|60	.|.	.|.	.|.	56|60	.|.	.|.	.|.	.|.	.|.	.|.	56|60	.|.	.|.	.|.	.|.	.|.	.|.	46|50	.|.	.|.	.|.	.|.	52|60	.|.	50|56	.|.	52|56	.|.	.|.
chr15:64010282-64010322	.|.	.|.	.|.	.|.	.|.	.|.	.|.	.|.	.|.	42|42	.|.	.|.	.|.	.|.	.|.	.|.	.|.	.|.	.|.	44|46	.|.	.|.	.|.	.|.	.|.	.|.	.|.	.|.	.|.	.|.	.|.	.|.	.|.	.|.	44|46	.|.	.|.	.|.	.|.	.|.	46|48	.|.	.|.	.|.	.|.	.|.	.|.	44|46	.|.
chr15:64551682-64551722	.|.	.|.	.|.	.|.	.|.	.|.	.|.	.|.	.|.	.|.	.|.	.|.	.|.	.|.	.|.	.|.	.|.	.|.	.|.	.|.	.|.	.|.	.|.	.|.	.|.	46|48	.|.	.|.	.|.	.|.	44|46	.|.	.|.	.|.	.|.	.|.	.|.	.|.	.|.	.|.	.|.	.|.	.|.	.|.	.|.	.|.	.|.	.|.	.|.
chr15:65737219-65737249	.|.	.|.	.|.	.|.	.|.	.|.	.|.	30|30	.|.	.|.	.|.	.|.	.|.	.|.	.|.	.|.	.|.	.|.	.|.	.|.	.|.	.|.	.|.	.|.	.|.	.|.	.|.	.|.	.|.	.|.	.|.	.|.	.|.	.|.	.|.	.|.	.|.	.|.	.|.	.|.	.|.	.|.	.|.	.|.	.|.	.|.	.|.	.|.	.|.
chr15:66145965-66145997	28|28	30|30	.|.	.|.	32|30	.|.	30|30	30|30	.|.	.|.	.|.	.|.	.|.	.|.	30|30	.|.	.|.	.|.	.|.	32|32	.|.	.|.	.|.	.|.	.|.	30|34	32|32	30|30	.|.	.|.	30|30	.|.	.|.	30|30	.|.	32|30	30|30	.|.	.|.	30|30	32|32	32|30	30|30	30|30	30|30	32|32	.|.	30|30	32|32
chr15:66583693-66583721	.|.	.|.	.|.	.|.	28|28	28|28	28|28	.|.	28|28	.|.	.|.	.|.	.|.	.|.	.|.	.|.	.|.	.|.	.|.	28|28	.|.	.|.	.|.	.|.	28|28	.|.	.|.	.|.	.|.	.|.	.|.	.|.	.|.	.|.	.|.	.|.	28|28	.|.	.|.	.|.	28|28	.|.	.|.	.|.	.|.	.|.	.|.	28|28	.|.
chr15:67124675-67124705	.|.	.|.	.|.	.|.	.|.	.|.	.|.	30|32	30|30	.|.	.|.	.|.	.|.	30|30	34|34	.|.	.|.	.|.	.|.	.|.	.|.	.|.	.|.	.|.	.|.	.|.	30|30	.|.	.|.	32|34	30|34	.|.	.|.	.|.	.|.	.|.	.|.	.|.	.|.	30|34	.|.	.|.	.|.	.|.	.|.	.|.	28|30	.|.	.|.
chr15:67697728-67697767	.|.	.|.	.|.	.|.	.|.	.|.	.|.	.|.	.|.	.|.	.|.	.|.	.|.	45|48	.|.	.|.	.|.	.|.	.|.	.|.	.|.	.|.	.|.	.|.	.|.	.|.	.|.	.|.	.|.	.|.	.|.	.|.	.|.	.|.	.|.	.|.	.|.	.|.	48|48	.|.	.|.	.|.	48|48	.|.	.|.	.|.	.|.	.|.	.|.
chr15:68383265-68383301	.|.	.|.	.|.	.|.	.|.	.|.	.|.	.|.	34|34	.|.	.|.	.|.	.|.	.|.	.|.	.|.	.|.	.|.	.|.	32|34	32|34	32|34	.|.	.|.	.|.	.|.	.|.	.|.	32|34	32|32	.|.	.|.	.|.	.|.	.|.	32|34	.|.	.|.	30|32	32|34	32|32	.|.	34|34	.|.	.|.	32|32	.|.	.|.	.|.
chr15:68510210-68510254	.|.	.|.	.|.	.|.	.|.	.|.	.|.	.|.	.|.	.|.	.|.	36|36	.|.	.|.	.|.	.|.	.|.	.|.	.|.	.|.	.|.	.|.	32|32	.|.	.|.	.|.	.|.	.|.	.|.	.|.	.|.	.|.	.|.	.|.	.|.	.|.	.|.	.|.	.|.	32|32	.|.	.|.	.|.	.|.	.|.	.|.	.|.	36|36	.|.
chr15:69540849-69540873	.|.	.|.	.|.	.|.	24|24	24|24	24|24	.|.	24|24	.|.	.|.	24|24	24|24	.|.	.|.	24|24	24|24	.|.	.|.	24|24	.|.	24|24	24|24	24|24	24|24	24|24	24|24	.|.	24|24	.|.	.|.	24|24	24|24	.|.	24|24	24|24	24|24	24|24	24|24	24|24	24|24	24|24	24|24	24|24	24|24	.|.	24|24	24|24	.|.
chr15:69579014-69579050	.|.	.|.	.|.	.|.	.|.	.|.	.|.	.|.	.|.	.|.	.|.	.|.	.|.	.|.	.|.	.|.	.|.	.|.	.|.	.|.	.|.	.|.	.|.	.|.	.|.	.|.	.|.	.|.	.|.	.|.	.|.	.|.	.|.	.|.	.|.	.|.	.|.	.|.	.|.	.|.	.|.	.|.	.|.	.|.	.|.	.|.	.|.	.|.	.|.
chr15:70047226-70047250	.|.	.|.	.|.	.|.	.|.	.|.	.|.	.|.	.|.	.|.	.|.	.|.	.|.	.|.	.|.	.|.	.|.	.|.	24|24	.|.	.|.	.|.	.|.	.|.	.|.	.|.	.|.	.|.	.|.	.|.	.|.	.|.	.|.	.|.	.|.	.|.	.|.	.|.	.|.	.|.	.|.	.|.	.|.	.|.	.|.	.|.	24|24	.|.	.|.
chr15:70686107-70686131	.|.	.|.	.|.	.|.	24|24	.|.	.|.	.|.	.|.	.|.	24|24	.|.	.|.	.|.	.|.	.|.	.|.	.|.	.|.	.|.	.|.	.|.	.|.	.|.	.|.	.|.	.|.	.|.	.|.	32|40	.|.	.|.	.|.	.|.	.|.	.|.	.|.	.|.	24|24	.|.	.|.	24|24	.|.	.|.	40|40	.|.	36|40	24|24	24|24
chr15:70749126-70749164	.|.	.|.	.|.	.|.	.|.	.|.	.|.	32|34	.|.	.|.	.|.	.|.	.|.	.|.	.|.	.|.	.|.	.|.	.|.	28|30	.|.	.|.	.|.	.|.	.|.	.|.	.|.	.|.	.|.	.|.	32|34	.|.	.|.	32|34	.|.	.|.	.|.	.|.	.|.	.|.	.|.	.|.	30|30	.|.	.|.	.|.	.|.	.|.	.|.
chr15:71010367-71010397	.|.	.|.	.|.	.|.	.|.	.|.	.|.	.|.	.|.	.|.	.|.	.|.	.|.	.|.	.|.	.|.	46|48	.|.	.|.	.|.	.|.	.|.	.|.	.|.	36|36	.|.	.|.	.|.	38|38	.|.	.|.	.|.	.|.	.|.	.|.	.|.	.|.	.|.	.|.	.|.	.|.	.|.	.|.	.|.	46|48	.|.	.|.	.|.	.|.
chr15:71183906-71183958	.|.	.|.	.|.	.|.	.|.	.|.	26|26	.|.	.|.	.|.	.|.	52|50	26|26	.|.	.|.	.|.	.|.	.|.	.|.	.|.	.|.	26|46	.|.	52|50	24|26	.|.	.|.	.|.	26|26	.|.	.|.	24|26	26|26	52|46	.|.	.|.	.|.	.|.	.|.	26|50	48|50	.|.	26|26	.|.	.|.	26|26	.|.	.|.	.|.
chr15:71237858-71237904	.|.	.|.	.|.	.|.	.|.	.|.	.|.	.|.	.|.	.|.	.|.	.|.	.|.	46|42	.|.	.|.	.|.	.|.	.|.	.|.	.|.	.|.	.|.	.|.	.|.	.|.	.|.	.|.	.|.	.|.	.|.	.|.	.|.	.|.	.|.	.|.	38|34	.|.	.|.	.|.	.|.	.|.	.|.	.|.	.|.	.|.	.|.	.|.	.|.
chr15:71367537-71367563	26|26	.|.	.|.	.|.	.|.	.|.	.|.	.|.	.|.	.|.	26|26	.|.	.|.	.|.	.|.	.|.	.|.	.|.	.|.	28|30	.|.	.|.	.|.	26|26	24|24	.|.	26|24	26|26	.|.	.|.	.|.	.|.	24|24	.|.	.|.	.|.	.|.	.|.	.|.	26|26	24|24	26|26	24|24	24|24	24|24	24|24	.|.	.|.	.|.
chr15:72046805-72046833	24|24	24|24	.|.	24|24	24|24	.|.	24|24	24|24	24|24	24|24	.|.	24|24	24|24	24|24	24|24	24|24	.|.	.|.	.|.	24|24	24|24	24|24	24|24	24|24	24|24	24|24	24|24	24|24	24|24	.|.	24|24	.|.	24|24	24|24	24|24	24|24	24|24	.|.	24|24	24|24	24|24	24|24	.|.	24|24	24|24	24|24	24|24	24|24	24|24
chr15:72267731-72267769	.|.	.|.	.|.	.|.	40|42	.|.	.|.	.|.	40|42	40|42	.|.	.|.	.|.	.|.	.|.	.|.	.|.	.|.	.|.	40|42	.|.	.|.	.|.	.|.	.|.	.|.	.|.	.|.	.|.	.|.	.|.	.|.	42|60	.|.	.|.	.|.	40|42	.|.	.|.	40|42	.|.	.|.	.|.	.|.	.|.	.|.	38|60	.|.	.|.
chr15:72829434-72829461	.|.	.|.	.|.	.|.	.|.	.|.	.|.	.|.	.|.	.|.	.|.	.|.	.|.	.|.	.|.	.|.	.|.	.|.	.|.	.|.	27|27	.|.	.|.	.|.	.|.	.|.	.|.	.|.	.|.	.|.	.|.	.|.	.|.	.|.	.|.	.|.	.|.	.|.	.|.	.|.	.|.	.|.	.|.	.|.	.|.	.|.	.|.	.|.	.|.
chr15:73308921-73308957	.|.	.|.	.|.	.|.	.|.	.|.	.|.	.|.	.|.	.|.	.|.	.|.	.|.	.|.	.|.	.|.	.|.	.|.	.|.	.|.	28|30	.|.	.|.	.|.	.|.	.|.	.|.	.|.	.|.	.|.	30|30	.|.	.|.	.|.	.|.	.|.	.|.	.|.	.|.	.|.	.|.	.|.	.|.	.|.	.|.	.|.	.|.	.|.	.|.
chr15:73977794-73977836	.|.	.|.	.|.	.|.	.|.	.|.	.|.	.|.	38|38	.|.	.|.	.|.	.|.	.|.	.|.	.|.	.|.	.|.	.|.	.|.	38|40	.|.	.|.	.|.	40|40	.|.	.|.	.|.	.|.	.|.	42|40	.|.	.|.	.|.	.|.	.|.	.|.	.|.	.|.	.|.	.|.	.|.	.|.	.|.	.|.	.|.	.|.	.|.	.|.
chr15:74600699-74600727	.|.	.|.	.|.	38|40	.|.	.|.	38|40	.|.	.|.	.|.	.|.	.|.	.|.	.|.	.|.	.|.	.|.	.|.	.|.	48|50	.|.	50|52	42|44	.|.	.|.	40|42	.|.	40|42	50|52	.|.	.|.	.|.	38|40	.|.	36|38	42|44	.|.	.|.	.|.	50|52	42|44	.|.	42|44	.|.	50|52	.|.	.|.	40|42	40|42
chr15:75440244-75440271	.|.	.|.	.|.	.|.	.|.	.|.	.|.	.|.	.|.	.|.	.|.	.|.	.|.	.|.	.|.	.|.	.|.	.|.	.|.	.|.	.|.	.|.	48|48	.|.	.|.	.|.	.|.	.|.	.|.	.|.	27|27	.|.	.|.	.|.	.|.	.|.	27|27	.|.	27|27	27|27	.|.	27|27	27|27	.|.	27|27	.|.	27|27	.|.	27|27
chr15:76314766-76314796	30|30	.|.	.|.	.|.	.|.	.|.	.|.	32|34	.|.	.|.	.|.	.|.	30|28	.|.	.|.	.|.	.|.	.|.	.|.	.|.	.|.	.|.	.|.	.|.	.|.	.|.	.|.	.|.	.|.	.|.	34|34	.|.	.|.	.|.	.|.	.|.	.|.	.|.	.|.	.|.	34|34	.|.	.|.	.|.	.|.	.|.	.|.	32|32	32|34
chr15:76658427-76658463	.|.	.|.	.|.	.|.	.|.	.|.	.|.	.|.	.|.	.|.	.|.	.|.	.|.	.|.	.|.	.|.	34|34	.|.	.|.	.|.	.|.	.|.	.|.	28|28	.|.	.|.	.|.	.|.	.|.	.|.	.|.	.|.	30|30	34|34	.|.	34|34	34|34	.|.	.|.	30|30	30|34	.|.	.|.	.|.	.|.	.|.	.|.	.|.	.|.
chr15:77409043-77409095	.|.	52|52	52|48	.|.	52|52	.|.	52|52	.|.	.|.	.|.	.|.	52|52	.|.	.|.	52|52	.|.	.|.	.|.	52|52	.|.	52|52	.|.	52|52	52|52	52|52	.|.	52|48	.|.	52|48	.|.	52|52	.|.	52|52	.|.	.|.	52|52	52|52	.|.	52|52	52|52	.|.	.|.	52|52	52|52	52|48	52|52	.|.	48|48	.|.
chr15:78332093-78332127	.|.	.|.	.|.	.|.	.|.	.|.	.|.	.|.	36|36	.|.	.|.	.|.	.|.	.|.	34|36	32|32	.|.	.|.	.|.	.|.	.|.	34|36	30|30	.|.	.|.	.|.	.|.	.|.	.|.	.|.	.|.	.|.	.|.	.|.	.|.	36|38	.|.	30|32	.|.	.|.	30|36	.|.	36|38	.|.	.|.	.|.	.|.	.|.	.|.
chr15:79645917-79645949	.|.	.|.	36|38	.|.	.|.	.|.	.|.	.|.	.|.	.|.	.|.	.|.	.|.	.|.	.|.	.|.	.|.	.|.	.|.	.|.	.|.	.|.	.|.	.|.	36|36	.|.	.|.	.|.	.|.	.|.	.|.	.|.	.|.	.|.	.|.	.|.	.|.	.|.	.|.	34|36	.|.	36|38	.|.	.|.	36|38	36|38	.|.	36|38	.|.
chr15:80103444-80103478	.|.	.|.	.|.	.|.	.|.	.|.	.|.	.|.	.|.	.|.	.|.	.|.	.|.	.|.	.|.	.|.	.|.	.|.	.|.	.|.	26|28	.|.	.|.	.|.	.|.	.|.	34|32	30|32	.|.	.|.	.|.	.|.	.|.	.|.	.|.	.|.	.|.	.|.	34|32	.|.	.|.	.|.	.|.	.|.	.|.	.|.	.|.	.|.	.|.
chr15:80730263-80730301	.|.	.|.	.|.	.|.	.|.	.|.	.|.	.|.	.|.	.|.	.|.	.|.	.|.	.|.	.|.	.|.	.|.	.|.	.|.	.|.	.|.	38|36	.|.	60|62	.|.	.|.	.|.	.|.	.|.	.|.	40|60	.|.	.|.	.|.	.|.	.|.	.|.	.|.	.|.	.|.	.|.	.|.	.|.	.|.	.|.	.|.	.|.	.|.	.|.
chr15:81078897-81078935	.|.	.|.	.|.	.|.	.|.	.|.	.|.	.|.	.|.	.|.	.|.	.|.	.|.	.|.	.|.	.|.	.|.	.|.	.|.	.|.	.|.	.|.	.|.	.|.	.|.	.|.	.|.	.|.	54|62	.|.	.|.	.|.	.|.	.|.	.|.	.|.	.|.	.|.	.|.	.|.	.|.	52|60	.|.	.|.	.|.	.|.	.|.	.|.	.|.
chr15:81379234-81379269	.|.	30|30	.|.	.|.	30|30	30|30	.|.	.|.	.|.	30|30	.|.	30|30	.|.	.|.	.|.	.|.	.|.	.|.	.|.	.|.	.|.	.|.	30|30	.|.	30|30	.|.	.|.	30|30	30|30	30|30	30|30	30|30	30|30	30|30	.|.	.|.	.|.	.|.	30|30	30|30	30|30	.|.	30|30	30|30	.|.	.|.	.|.	30|30	.|.
chr15:81426235-81426265	24|24	.|.	.|.	.|.	.|.	.|.	.|.	.|.	24|24	24|24	.|.	24|24	.|.	.|.	24|24	.|.	.|.	24|24	.|.	24|24	24|24	.|.	.|.	.|.	.|.	.|.	24|24	.|.	24|24	.|.	24|24	.|.	24|24	.|.	.|.	.|.	.|.	.|.	.|.	24|24	.|.	.|.	.|.	24|24	24|24	.|.	.|.	24|24	.|.
chr15:81763989-81764014	.|.	.|.	.|.	.|.	25|25	.|.	.|.	25|25	.|.	.|.	.|.	25|25	.|.	.|.	25|25	.|.	.|.	.|.	.|.	.|.	.|.	.|.	.|.	.|.	.|.	.|.	25|25	.|.	.|.	.|.	.|.	.|.	.|.	.|.	25|25	.|.	.|.	.|.	.|.	25|25	.|.	.|.	.|.	.|.	.|.	.|.	.|.	25|25	.|.
chr15:81779635-81779687	.|.	.|.	.|.	.|.	.|.	.|.	.|.	.|.	50|54	.|.	.|.	.|.	.|.	.|.	.|.	.|.	.|.	.|.	.|.	46|56	.|.	.|.	.|.	.|.	.|.	.|.	.|.	.|.	52|56	.|.	52|56	.|.	.|.	54|42	.|.	40|42	.|.	.|.	44|40	44|40	.|.	.|.	.|.	.|.	.|.	.|.	42|42	.|.	.|.
chr15:81986328-81986366	.|.	.|.	.|.	.|.	38|44	44|44	.|.	38|38	.|.	.|.	.|.	.|.	38|38	44|44	.|.	.|.	.|.	.|.	.|.	.|.	44|44	.|.	.|.	36|36	.|.	.|.	.|.	.|.	.|.	.|.	.|.	.|.	.|.	.|.	.|.	.|.	32|36	.|.	.|.	34|36	.|.	.|.	36|36	36|44	.|.	.|.	.|.	44|44	34|36
chr15:83283599-83283631	.|.	.|.	.|.	.|.	.|.	.|.	.|.	.|.	.|.	.|.	.|.	.|.	.|.	.|.	.|.	.|.	30|34	.|.	.|.	.|.	.|.	.|.	.|.	32|34	.|.	32|30	.|.	32|30	.|.	.|.	30|34	.|.	.|.	.|.	.|.	.|.	32|30	.|.	.|.	.|.	.|.	.|.	.|.	.|.	.|.	.|.	.|.	.|.	.|.
chr15:83719182-83719216	.|.	.|.	.|.	.|.	.|.	.|.	.|.	.|.	.|.	34|36	.|.	.|.	.|.	.|.	.|.	.|.	.|.	.|.	.|.	.|.	.|.	.|.	.|.	.|.	.|.	.|.	.|.	.|.	.|.	.|.	.|.	.|.	.|.	.|.	34|36	.|.	.|.	.|.	.|.	.|.	.|.	.|.	.|.	.|.	.|.	.|.	.|.	.|.	.|.
chr15:83739376-83739412	.|.	.|.	.|.	.|.	.|.	.|.	30|30	.|.	.|.	.|.	.|.	.|.	.|.	.|.	32|32	.|.	.|.	.|.	.|.	.|.	.|.	.|.	.|.	32|32	.|.	.|.	.|.	.|.	.|.	.|.	.|.	30|32	.|.	.|.	32|32	.|.	30|30	.|.	.|.	30|30	.|.	.|.	.|.	.|.	32|32	.|.	.|.	.|.	.|.
chr15:84804022-84804048	.|.	.|.	.|.	.|.	.|.	24|24	.|.	26|24	.|.	.|.	.|.	.|.	.|.	.|.	.|.	.|.	.|.	.|.	.|.	.|.	.|.	.|.	.|.	.|.	.|.	.|.	.|.	.|.	.|.	.|.	.|.	.|.	.|.	.|.	.|.	.|.	.|.	.|.	.|.	.|.	.|.	.|.	26|24	.|.	.|.	.|.	.|.	.|.	.|.
chr15:84881184-84881212	.|.	.|.	.|.	.|.	.|.	.|.	22|26	.|.	.|.	.|.	.|.	.|.	.|.	.|.	.|.	.|.	.|.	.|.	.|.	.|.	.|.	.|.	28|26	.|.	.|.	.|.	.|.	.|.	.|.	28|22	.|.	.|.	.|.	.|.	.|.	.|.	.|.	.|.	.|.	.|.	.|.	.|.	.|.	.|.	.|.	.|.	.|.	.|.	.|.
chr15:85129357-85129381	.|.	24|24	.|.	.|.	.|.	.|.	.|.	.|.	.|.	.|.	.|.	.|.	.|.	.|.	.|.	.|.	24|24	.|.	.|.	24|24	.|.	.|.	.|.	.|.	.|.	24|24	24|24	24|24	24|24	.|.	24|24	.|.	.|.	.|.	.|.	.|.	.|.	.|.	.|.	.|.	.|.	24|24	24|24	.|.	24|24	24|24	.|.	.|.	.|.
chr15:85760282-85760320	.|.	26|30	.|.	.|.	.|.	.|.	26|22	.|.	.|.	.|.	.|.	44|46	.|.	.|.	.|.	.|.	.|.	.|.	.|.	.|.	.|.	.|.	.|.	.|.	.|.	.|.	.|.	.|.	.|.	26|30	44|22	.|.	.|.	.|.	.|.	40|46	46|48	26|30	.|.	40|44	.|.	.|.	.|.	.|.	30|44	40|44	.|.	44|46	.|.
chr15:85905351-85905399	.|.	.|.	.|.	.|.	.|.	.|.	.|.	.|.	.|.	.|.	.|.	.|.	.|.	.|.	.|.	.|.	.|.	.|.	.|.	48|54	.|.	.|.	.|.	.|.	.|.	.|.	.|.	.|.	.|.	.|.	.|.	.|.	50|54	.|.	.|.	.|.	.|.	.|.	.|.	.|.	.|.	.|.	.|.	.|.	.|.	.|.	.|.	.|.	.|.
chr15:86089552-86089590	.|.	.|.	.|.	.|.	36|36	.|.	.|.	.|.	.|.	.|.	.|.	.|.	.|.	.|.	.|.	.|.	48|52	.|.	.|.	.|.	.|.	.|.	.|.	34|34	.|.	48|52	.|.	.|.	48|52	.|.	.|.	.|.	.|.	.|.	.|.	.|.	.|.	.|.	.|.	.|.	.|.	.|.	.|.	.|.	.|.	.|.	.|.	.|.	.|.
chr15:86144839-86144879	.|.	.|.	.|.	.|.	.|.	.|.	.|.	.|.	.|.	32|34	.|.	.|.	.|.	.|.	.|.	.|.	.|.	.|.	.|.	32|32	.|.	.|.	.|.	.|.	.|.	32|34	.|.	.|.	.|.	.|.	.|.	.|.	.|.	.|.	.|.	.|.	.|.	.|.	.|.	.|.	.|.	.|.	.|.	.|.	.|.	.|.	.|.	.|.	.|.
chr15:86263491-86263521	.|.	.|.	.|.	.|.	.|.	.|.	.|.	.|.	.|.	.|.	.|.	.|.	.|.	.|.	.|.	.|.	.|.	.|.	.|.	30|28	.|.	.|.	.|.	.|.	.|.	.|.	.|.	.|.	30|30	.|.	30|30	.|.	.|.	.|.	.|.	.|.	.|.	.|.	.|.	.|.	.|.	.|.	.|.	.|.	.|.	.|.	.|.	.|.	.|.
chr15:87160991-87161025	.|.	.|.	34|32	.|.	.|.	.|.	.|.	.|.	.|.	.|.	.|.	.|.	.|.	.|.	.|.	.|.	.|.	.|.	.|.	34|30	.|.	.|.	34|32	.|.	.|.	.|.	.|.	.|.	.|.	.|.	.|.	.|.	.|.	.|.	.|.	.|.	32|32	.|.	.|.	.|.	.|.	.|.	.|.	.|.	34|34	.|.	34|32	.|.	.|.
chr15:87589457-87589505	.|.	.|.	.|.	.|.	.|.	.|.	.|.	40|42	.|.	.|.	.|.	.|.	.|.	.|.	.|.	.|.	.|.	.|.	.|.	.|.	34|38	36|38	.|.	.|.	.|.	.|.	.|.	.|.	.|.	.|.	.|.	.|.	.|.	.|.	.|.	.|.	.|.	.|.	.|.	.|.	.|.	.|.	.|.	.|.	.|.	.|.	.|.	.|.	.|.
chr15:87617558-87617600	.|.	.|.	30|34	.|.	36|46	42|48	38|46	32|34	42|46	.|.	42|46	.|.	.|.	.|.	44|48	34|46	.|.	42|46	.|.	32|36	40|46	.|.	.|.	42|48	.|.	.|.	32|34	44|48	.|.	.|.	32|34	.|.	40|44	.|.	.|.	40|44	.|.	38|44	.|.	44|48	32|44	.|.	.|.	.|.	38|44	.|.	.|.	38|44	32|36
chr15:88273170-88273198	.|.	.|.	.|.	28|28	.|.	.|.	.|.	.|.	28|28	.|.	.|.	.|.	.|.	28|28	.|.	.|.	.|.	.|.	.|.	.|.	.|.	.|.	.|.	.|.	.|.	.|.	.|.	.|.	.|.	.|.	.|.	.|.	.|.	.|.	.|.	.|.	.|.	.|.	.|.	.|.	28|28	.|.	.|.	.|.	.|.	.|.	.|.	.|.	.|.
chr15:88422137-88422185	.|.	.|.	.|.	.|.	34|36	36|36	.|.	36|38	.|.	36|36	.|.	.|.	34|38	.|.	.|.	.|.	.|.	.|.	.|.	.|.	34|38	.|.	.|.	.|.	.|.	.|.	.|.	.|.	38|52	.|.	.|.	.|.	34|38	50|44	.|.	.|.	.|.	34|38	.|.	.|.	40|50	46|44	46|50	.|.	.|.	46|50	.|.	.|.	.|.
chr15:88690736-88690784	.|.	.|.	.|.	.|.	27|27	.|.	.|.	.|.	.|.	.|.	.|.	.|.	.|.	.|.	.|.	.|.	.|.	.|.	.|.	27|27	.|.	.|.	.|.	.|.	.|.	.|.	.|.	.|.	27|27	.|.	.|.	.|.	.|.	.|.	.|.	.|.	51|51	.|.	.|.	.|.	48|51	.|.	.|.	.|.	.|.	.|.	27|27	.|.	27|27
chr15:88839449-88839481	.|.	.|.	.|.	.|.	.|.	.|.	.|.	.|.	26|26	.|.	.|.	.|.	.|.	.|.	.|.	.|.	.|.	.|.	.|.	.|.	.|.	.|.	.|.	.|.	.|.	.|.	.|.	.|.	26|28	.|.	.|.	.|.	.|.	.|.	.|.	.|.	.|.	.|.	24|26	.|.	.|.	.|.	.|.	.|.	.|.	.|.	.|.	.|.	.|.
chr15:88985951-88985985	.|.	34|36	.|.	.|.	.|.	.|.	.|.	.|.	34|32	.|.	.|.	.|.	.|.	34|36	30|30	.|.	.|.	26|28	.|.	.|.	.|.	.|.	.|.	.|.	28|36	.|.	34|36	28|28	26|28	.|.	.|.	.|.	28|28	.|.	.|.	28|36	34|36	28|28	36|36	.|.	.|.	.|.	28|28	.|.	.|.	.|.	26|28	.|.	.|.
chr15:90581939-90581973	.|.	.|.	.|.	.|.	.|.	.|.	.|.	.|.	.|.	.|.	.|.	.|.	.|.	.|.	.|.	.|.	.|.	.|.	.|.	.|.	.|.	.|.	.|.	.|.	.|.	.|.	.|.	.|.	.|.	.|.	.|.	.|.	66|68	.|.	.|.	.|.	.|.	.|.	.|.	.|.	.|.	.|.	.|.	.|.	.|.	.|.	.|.	62|70	.|.
[truncated: 5,802 more rows]
[truncated: 65 more columns]
