# Supplementary material for: RETrace: simultaneous retrospective lineage tracing and methylation profiling of single cells
Source: HighWire-hosted journal article supplement (doi:10.1101/gr.255851.119), 2020-03-03
Supplement: Supplemental_Table_S6.xlsx [file Supplemental_Table_S6.xlsx]

## Sheet: Sheet1
Supplementary Table S6: Sequencing statistics for filtered U87MG single cells
	Microsatellite Statistics	Methylaion Statistics
Sample	Microsatellite Targets (>= 30 reads)	Unique CpG (1x)	Mean Coverage (1x)	Unique CpG (5x)	Mean Coverage (5x)	Unique CpG (10x)	Mean Coverage (10x)	Number CGI	Mean Coverage
2-1-10F_3-1-11F_4C	1058	369735	6.87	236669	9.36	93897	13.18	11222	30.79
2-1-10F_3-1-11F_4E	1096	334370	16.86	270590	20.33	221348	23.31	10588	75.09
2-1-10F_3-1-11F_4F	1179	162950	15.48	129084	18.95	99637	22.48	6837	50.66
2-1-10F_3-1-11F_5B	1790	114730	15.28	93736	18.18	71673	21.62	4534	38.33
2-1-10F_3-1-11F_5D	753	216727	13.67	178979	16.06	132283	19.25	8137	46.78
2-1-10F_3-1-11F_5E	859	345515	10.5	268545	12.82	173131	16.02	10644	49.07
2-1-10F_3-1-11F_5F	1426	352450	10.29	268102	12.78	173339	15.94	10730	45.59
2-1-10F_3-1-11F_5G	1228	167226	8.52	117322	11.15	63789	14.66	6832	27.2
2-1-10F_3-1-11F_6B	418	33217	18.01	26677	21.89	21241	25.69	1604	38.89
2-1-10F_3-1-11F_6C	810	398425	10.59	301373	13.25	197999	16.51	11668	53.15
2-1-10F_3-1-11F_6D	682	548526	15.21	451838	17.98	356572	20.91	13100	93.24
2-1-10F_3-1-11F_6E	796	318920	10.43	238386	13.16	156566	16.39	10589	47.67
2-1-10F_3-1-8G_7B	498	280027	12	209907	15.26	149404	18.63	9424	55.53
2-1-10F_3-1-8G_7C	408	247192	13.91	186418	17.72	137716	21.55	9287	57.64
2-1-10F_3-1-8G_7D	942	335363	11.97	252820	15.14	180128	18.45	10939	56.64
2-1-10F_3-1-8G_7E	479	528138	12.46	387877	16.17	279505	19.75	13400	82.41
2-1-10F_3-1-8G_7G	415	161098	17.98	128477	21.98	102400	25.81	7147	58.02
2-1-10F_3-1-8G_8B	508	505023	19.92	428139	23.1	360842	26.11	12708	113.75
2-1-10F_3-1-8G_8C	567	231334	20.39	193173	23.97	160644	27.41	8529	75.43
2-1-10F_3-1-8G_8D	802	277260	14.09	207820	18.06	154580	21.88	10197	61.29
2-1-10F_3-1-8G_8E	926	297468	12	224027	15.2	160308	18.48	10236	54.29
2-1-10F_3-1-8G_8F	275	132671	11.88	87644	16.85	58163	21.93	6636	39.18
2-1-10F_3-1-8G_8G	500	33438	3.19	7063	8.26	1660	14.04	3118	8.41
2-1-10F_3-1-8G_9B	287	104458	32.18	91934	36.26	82061	39.79	4653	93.42
2-1-10F_3-1-8G_9C	1075	330733	11.86	251691	14.87	181011	17.96	10482	53.94
2-1-10F_3-1-8G_9D	212	104745	15.99	81834	19.83	62445	23.85	5007	45.58
2-1-10F_3-1-8G_9F	224	169009	17.7	138281	21.13	111263	24.58	7042	57.97
2-1-1D_3-1-10E_10D	289	394551	13.02	307498	16.07	227619	19.25	11485	66.73
2-1-1D_3-1-10E_10E	444	569324	4.17	205762	7.44	34880	12.64	13431	28.31
2-1-1D_3-1-10E_10F	490	600225	8.51	403166	11.55	221864	15.32	13931	58.19
2-1-1D_3-1-10E_10G	1082	508773	9.69	361246	12.71	221949	16.32	12676	61.49
2-1-1D_3-1-10E_11D	476	262344	11.25	168235	16.37	111944	21.17	10388	56.08
2-1-1D_3-1-10E_11E	348	191045	11.07	116065	16.87	77176	21.94	8918	48.28
2-1-1D_3-1-10E_11F	1649	325004	24.44	268528	29.13	231107	32.73	10876	118.59
2-1-1D_3-1-10E_11G	1585	303915	21.07	241605	25.95	200731	29.83	10611	100.62
2-1-1D_3-1-10E_12F	284	338957	13.78	254130	17.65	186409	21.55	11309	65.43
2-1-1D_3-1-10E_12G	342	107682	14.95	83162	18.69	62074	22.68	4626	43.26
2-1-3C_3-1-10G_7B	1727	40207	5.73	13365	13.6	6746	20.42	3847	17.45
2-1-3C_3-1-10G_7D	567	85060	9.42	39795	17.98	24516	25.02	6028	35.37
2-1-3C_3-1-10G_7E	923	507139	32.77	363781	44.89	296433	53.55	13904	278.2
2-1-3C_3-1-10G_7F	715	206635	38.41	156821	49.96	132935	57.73	9301	179.47
2-1-3C_3-1-10G_7G	1947	264500	29.27	191467	39.66	155921	47.16	10774	157.48
2-1-3C_3-1-10G_8B	2708	637460	21.25	473008	27.91	381977	32.93	15313	171.94
2-1-3C_3-1-10G_8E	1208	794805	14.23	542363	19.86	395157	24.72	16018	140.67
2-1-3C_3-1-10G_8F	1141	236678	16.94	157815	24.38	119008	30.12	10140	82.51
2-1-3C_3-1-10G_8G	1699	382885	22.06	281285	29.27	227473	34.59	12518	134.48
2-1-3C_3-1-12C_1D	681	120686	27.94	105858	31.54	95148	34.31	5321	85.54
2-1-3C_3-1-12C_1E	706	509677	8.59	369709	10.92	197840	14.32	12935	50.23
2-1-3C_3-1-12C_1F	644	222322	24.62	195443	27.7	175182	30.1	7849	88.55
2-1-3C_3-1-12C_2B	816	110850	103.49	99067	115.55	93172	122.43	5078	313.26
2-1-3C_3-1-12C_2F	890	120942	41.67	95706	52.11	82981	59.06	6693	145.26
2-1-3C_3-1-12C_3B	1251	82435	65.56	70299	76.53	64071	83.31	4409	192.5
2-1-3C_3-1-6B_10C	611	31483	6.16	11813	13.3	6054	19.76	3143	17.49
2-1-3C_3-1-6B_10F	1583	178291	16.37	97700	28.29	69216	37.18	9603	80.23
2-1-3C_3-1-6B_10G	549	76631	82.18	63830	98.27	57894	107.64	4378	238.7
2-1-3C_3-1-6B_12C	273	71482	40.14	56047	50.62	47761	58.22	4598	120.38
2-1-3C_3-1-8E_4C	425	310553	24.28	251655	29.46	213139	33.55	10860	120.99
2-1-3C_3-1-8E_4D	764	233173	15.21	171653	19.9	130020	24.08	9784	67.66
2-1-3C_3-1-8E_4G	740	203113	27.12	166984	32.53	143907	36.65	8303	105.32
2-1-3C_3-1-8E_6C	390	115078	17.61	81675	23.97	63702	28.8	6421	61.72
2-1-3C_3-1-8E_6F	397	214894	20.96	157750	27.81	126363	33.02	9534	93.3
