# Supplementary material for: RETrace: simultaneous retrospective lineage tracing and methylation profiling of single cells
Source: HighWire-hosted journal article supplement (doi:10.1101/gr.255851.119), 2020-03-03
Supplement: Supplemental_Table_S7.xlsx [file Supplemental_Table_S7.xlsx]

## Sheet: Sheet1
Supplementary Table S7: Sequencing statistics for filtered brain single nuclei
	Microsatellite Statistics	Methylaion Statistics
Sample	Microsatellite Targets (>= 30 reads)	Unique CpG (1x)	Mean Coverage (1x)	Unique CpG (5x)	Mean Coverage (5x)	Unique CpG (10x)	Mean Coverage (10x)	Number CGI	Mean Coverage
SC_Cereb-NeuNpos_7B	1012	145251	2.22	9970	6.08	344	18.18	7587	7.09
SC_Cereb-NeuNpos_7C	659	119551	2.9	20887	6.27	917	13.34	6180	8.69
SC_Cereb-NeuNpos_7D	309	148306	3.04	28945	6.38	1478	13.55	6964	9.71
SC_Cereb-NeuNpos_7E	839	201135	4.02	70973	6.95	7713	12.38	8778	13.86
SC_Cereb-NeuNpos_7F	658	235984	4.37	94064	7.25	12824	12.86	9439	15.54
SC_Cereb-NeuNpos_8B	858	238600	4.75	103943	7.73	19880	13.05	9742	18.57
SC_Cereb-NeuNpos_8C	709	227010	4.01	78590	7.13	9983	12.64	9402	15.16
SC_Cereb-NeuNpos_8D	429	117963	3.97	39171	7.28	5935	12.42	5940	12.24
SC_Cereb-NeuNpos_8E	614	85285	4.14	29528	7.65	5884	12.73	4664	10.86
SC_Cereb-NeuNpos_8G	839	192116	4.34	74943	7.37	11462	12.76	8571	13.88
SC_Cereb-NeuNpos_9B	821	151320	4.14	54998	7.24	7671	12.64	7214	12.66
SC_Cereb-NeuNpos_9C	767	121505	4.12	42840	7.38	7103	12.56	6289	11.16
SC_Cereb-NeuNpos_9D	632	79542	4.48	31668	7.68	6421	12.47	4459	11.23
SC_Cereb-NeuNpos_9E	647	60913	4.31	22310	7.75	4711	12.71	3462	9.73
SC_Cereb-NeuNpos_9F	553	66452	3.68	18624	7.45	3069	12.93	3771	8.48
SC_Cereb-NeuNpos_9G	734	113449	3.63	33228	6.86	3477	12.14	5794	9.79
SC_Cortex1-NeuNneg_10B	848	233319	2.33	20214	5.94	563	14.4	10001	8.69
SC_Cortex1-NeuNneg_10C	890	241142	2.32	20918	5.93	556	14.49	10164	8.58
SC_Cortex1-NeuNneg_10D	737	172979	2.5	19669	6.08	586	13.7	8245	7.96
SC_Cortex1-NeuNneg_10E	1008	190745	2.32	16765	5.98	508	13.74	8758	7.8
SC_Cortex1-NeuNneg_10F	903	138412	2.8	22516	6.33	1200	11.68	7068	8.02
SC_Cortex1-NeuNneg_10G	741	135043	2.84	22799	6.37	1314	12.1	7039	8.59
SC_Cortex1-NeuNneg_11B	520	56795	2.39	6199	6.13	260	11.48	3481	5.31
SC_Cortex1-NeuNneg_11C	766	193606	2.04	9358	6.01	318	16.55	9084	7.19
SC_Cortex1-NeuNneg_11D	779	89090	2.57	11338	6.2	544	11.78	5306	6.69
SC_Cortex1-NeuNneg_11E	765	233775	2.37	20919	6.01	564	17.3	9988	9.02
SC_Cortex1-NeuNneg_11F	740	127677	2.38	11965	5.93	340	13.43	6588	7.01
SC_Cortex1-NeuNneg_11G	567	153461	1.99	6978	5.7	162	13.24	7727	6.45
SC_Cortex1-NeuNneg_12C	599	91725	4.62	37405	7.92	8741	12.69	4971	11.18
SC_Cortex1-NeuNneg_12D	534	105303	3.7	31534	6.94	3407	12.16	5803	10.14
SC_Cortex1-NeuNneg_12E	549	84133	4.13	30050	7.38	5280	12.12	4704	10.02
SC_Cortex1-NeuNneg_12F	535	103127	4.62	43802	7.62	8973	12.04	5568	12.03
SC_Cortex1-NeuNneg_12G	458	56865	3.37	14602	6.59	1021	11.36	3352	8.18
SC_Cortex1-NeuNpos_7B	812	172614	2.9	31003	6.32	1469	12.03	8461	9.76
SC_Cortex1-NeuNpos_7C	510	163908	2.11	9849	5.76	194	11.52	8129	7.21
SC_Cortex1-NeuNpos_7D	799	194665	2.06	10376	5.9	229	18.14	9375	7.29
SC_Cortex1-NeuNpos_7E	677	197517	2.71	29055	6.22	1242	12.91	9362	9.78
SC_Cortex1-NeuNpos_7F	684	166825	2.55	20571	6.13	743	11.94	8522	8.24
SC_Cortex1-NeuNpos_7G	440	148066	3.59	42210	6.88	4520	12.31	7682	11.46
SC_Cortex1-NeuNpos_8B	904	242634	3.67	72664	6.74	6436	12.34	10429	13.49
SC_Cortex1-NeuNpos_8C	769	284410	3.01	54551	6.33	2616	12.78	11273	12.84
SC_Cortex1-NeuNpos_8D	534	223745	2.86	37136	6.28	1716	13.54	10051	11.38
SC_Cortex1-NeuNpos_8E	742	214536	3.55	60712	6.68	4592	12.73	9577	13.6
SC_Cortex1-NeuNpos_8F	463	116174	3.05	23321	6.54	1763	11.63	6551	8.82
SC_Cortex1-NeuNpos_8G	603	156085	3.77	48143	7.03	5995	12.25	7831	11.86
SC_Cortex1-NeuNpos_9B	593	216226	3.55	60773	6.65	4817	12.17	9712	12.61
SC_Cortex1-NeuNpos_9C	754	256009	2.7	36423	6.17	1232	14.97	10740	11.19
SC_Cortex1-NeuNpos_9D	807	270321	2.69	37579	6.16	1256	15.61	10990	10.85
SC_Cortex1-NeuNpos_9E	576	201538	3.16	44054	6.4	2616	12.37	9252	11.31
SC_Cortex1-NeuNpos_9F	706	230417	2.92	40835	6.27	1575	13.75	10045	10.94
SC_Cortex1-NeuNpos_9G	502	185504	2.91	32799	6.35	1710	12.92	8951	9.79
SC_Cortex2-NeuNneg_4B	857	234094	3.27	54231	6.61	3515	14.42	9897	12.15
SC_Cortex2-NeuNneg_4C	754	212771	3.14	44510	6.58	3129	13.19	9237	11.03
SC_Cortex2-NeuNneg_4D	690	268977	2.83	42553	6.38	2081	15.09	10558	11.42
SC_Cortex2-NeuNneg_4E	734	110598	2.71	16448	6.44	1130	13.19	5926	7.73
SC_Cortex2-NeuNneg_4F	613	129225	3.04	25647	6.72	2393	12.7	6656	8.94
SC_Cortex2-NeuNneg_4G	539	131522	2.98	25071	6.59	1885	12.42	6914	9.12
SC_Cortex2-NeuNneg_5B	956	281896	3.98	97045	6.9	8919	13.43	11511	16.83
SC_Cortex2-NeuNneg_5C	580	125224	3.18	27463	6.52	1864	12.2	6443	10.02
SC_Cortex2-NeuNneg_5D	780	266172	3.56	74441	6.65	5348	13.49	10589	14.35
SC_Cortex2-NeuNneg_5E	612	120648	3.1	24795	6.41	1407	12.66	6191	8.87
SC_Cortex2-NeuNneg_5F	506	187739	3.97	63256	7.04	6874	13.17	8334	13.75
SC_Cortex2-NeuNneg_5G	388	127563	3.25	29262	6.54	2148	12.21	6341	9.47
SC_Cortex2-NeuNneg_6B	867	180935	2.36	15542	6.08	510	17.42	8372	8.07
SC_Cortex2-NeuNneg_6C	814	184786	1.97	6931	6.32	417	18.83	8705	6.7
SC_Cortex2-NeuNneg_6D	798	216098	2.97	39985	6.29	1686	14.75	9407	10.84
SC_Cortex2-NeuNneg_6E	633	166170	3.34	40299	6.62	3216	12.45	7847	10.67
SC_Cortex2-NeuNneg_6F	562	130255	2.96	23927	6.44	1467	12.82	6606	8.67
SC_Cortex2-NeuNneg_6G	430	99815	2.67	13481	6.17	523	12.64	5302	7.68
SC_Cortex2-NeuNpos_1B	756	180688	2.53	21603	6.01	654	13.58	8782	8.62
SC_Cortex2-NeuNpos_1C	1395	534763	2.31	45140	6.24	1485	20.33	14801	14.15
SC_Cortex2-NeuNpos_1D	734	226901	2.73	33825	6.12	1191	13.72	10152	10.35
SC_Cortex2-NeuNpos_1E	665	204841	2.83	33841	6.25	1484	13.38	9501	10.32
SC_Cortex2-NeuNpos_1F	623	192494	3.16	42241	6.47	2618	12.02	8904	11.14
SC_Cortex2-NeuNpos_1G	425	131221	2.95	24717	6.2	1069	11.62	6986	8.98
SC_Cortex2-NeuNpos_2B	519	111368	2.69	16028	6.24	706	13.75	5698	8.6
SC_Cortex2-NeuNpos_2C	1084	183178	2.82	30074	6.29	1435	13.22	8482	9.78
SC_Cortex2-NeuNpos_2E	983	224941	2.85	37715	6.28	1644	13.65	10201	10.75
SC_Cortex2-NeuNpos_2F	842	265952	2.64	35566	6.09	951	14.53	10809	10.56
SC_Cortex2-NeuNpos_2G	524	96028	2.54	12303	6.02	352	11.78	5369	7.07
SC_Cortex2-NeuNpos_3B	959	154063	3.12	32438	6.45	1891	12.22	7890	9.87
SC_Cortex2-NeuNpos_3C	801	168609	2.38	16569	5.94	453	12.15	8334	7.88
SC_Cortex2-NeuNpos_3D	811	145699	3.35	36409	6.64	3027	12	7468	10.62
SC_Cortex2-NeuNpos_3E	877	177645	2.66	25397	6.12	898	12.48	8682	8.99
SC_Cortex2-NeuNpos_3F	842	111170	3.09	23928	6.45	1605	11.55	6330	8.43
SC_Cortex2-NeuNpos_3G	527	76799	2.02	4470	5.82	91	11.12	4575	5.09
SC_Cortex2-NeuNpos_4B	1036	203554	2.81	33579	6.34	1909	11.89	9275	10.14
SC_Cortex2-NeuNpos_4C	936	178134	2.62	23551	6.21	981	12.84	8596	8.64
SC_Cortex2-NeuNpos_4D	732	228705	2.47	24830	6.19	1154	13.13	10051	9.49
SC_Cortex2-NeuNpos_4E	778	205409	2.52	24295	6.19	1049	12.69	9461	8.96
SC_Cortex2-NeuNpos_4F	704	158580	2.68	22613	6.35	1341	12.28	8180	8.49
SC_Cortex2-NeuNpos_4G	814	148069	2.27	12805	5.97	307	14.33	7917	7.26
SC_Cortex2-NeuNpos_5B	696	259671	3.45	68761	6.68	5468	12.55	10717	13.87
SC_Cortex2-NeuNpos_5C	549	221220	3.79	69985	6.94	7859	12	9588	14.37
SC_Cortex2-NeuNpos_5D	798	271348	2.7	38450	6.18	1527	13.93	11030	10.82
SC_Cortex2-NeuNpos_5E	659	191383	4.11	69129	7.19	10056	12.11	8898	14.85
SC_Cortex2-NeuNpos_5F	403	160469	3.07	32852	6.53	2389	11.68	8075	9.47
SC_Cortex2-NeuNpos_5G	563	103872	2.36	11002	6.17	573	11.45	5811	6.22
SC_Cortex2-NeuNpos_6B	790	99832	1.84	3585	5.9	93	14.2	5989	4.94
SC_Cortex2-NeuNpos_6C	709	95182	1.61	1381	5.6	30	12.17	5704	4.26
SC_Cortex2-NeuNpos_6D	436	135638	1.74	3434	5.62	67	12.39	7481	5.34
SC_Cortex2-NeuNpos_6E	510	126083	1.66	2039	5.81	74	14.09	6926	4.89
SC_Cortex2-NeuNpos_6F	602	74979	1.81	2423	5.72	26	10.81	4625	4.56
SC_Cortex2-NeuNpos_6G	516	152269	2.03	7374	5.89	263	14.64	7544	6.15
SC_Hipp-NeuNneg_10B	851	62248	3.07	12221	6.99	1599	12.45	3969	7.6
SC_Hipp-NeuNneg_10C	927	107753	2.59	14125	6.51	1004	13.48	6213	7.39
SC_Hipp-NeuNneg_10D	966	73455	3.16	15708	6.92	2024	12.07	4647	8.1
SC_Hipp-NeuNneg_10E	787	49352	2.99	9373	6.9	1189	12.07	3102	6.86
SC_Hipp-NeuNneg_10F	585	57465	3.1	11770	7.19	1714	12.49	3595	7.36
SC_Hipp-NeuNneg_10G	500	79336	2.86	13832	6.72	1228	12.51	4554	7.09
SC_Hipp-NeuNneg_11C	655	147829	3	27673	6.6	1967	13.38	7221	9.18
SC_Hipp-NeuNneg_11D	601	101352	2.54	12162	6.27	652	13.51	5462	6.81
SC_Hipp-NeuNneg_11E	692	153932	2.75	22959	6.29	1114	14.44	7313	8.43
SC_Hipp-NeuNneg_11F	680	155228	2.52	17779	6.23	748	14.62	7515	7.49
SC_Hipp-NeuNneg_11G	416	148944	2.76	22756	6.31	1165	12.97	7145	8.18
SC_Hipp-NeuNneg_12B	795	196666	5.13	95091	7.92	21253	12.77	8589	16.57
SC_Hipp-NeuNneg_12C	611	149403	3.73	45298	6.97	5009	12.79	7184	10.57
SC_Hipp-NeuNneg_12E	692	145739	4.13	52605	7.2	7379	12.37	6897	11.89
SC_Hipp-NeuNneg_12F	689	115912	3.78	35393	7.16	5038	12.35	5632	9.96
SC_Hipp-NeuNneg_12G	227	108264	3.88	34528	7.25	5270	12.05	5507	10.21
SC_Hipp-NeuNpos_1B	876	102717	2.95	18470	6.45	990	13.97	5898	8.45
SC_Hipp-NeuNpos_1D	706	129482	3	24435	6.57	1665	12.84	6660	8.71
SC_Hipp-NeuNpos_1E	646	101639	3.39	25216	7	3253	12.29	5542	9.01
SC_Hipp-NeuNpos_1F	629	109881	3.81	34982	6.99	3891	12.36	5962	10.86
SC_Hipp-NeuNpos_1G	401	108376	4.43	42854	7.54	8133	12.34	5742	12.7
SC_Hipp-NeuNpos_2B	837	155532	3.44	40982	6.59	2686	13.54	7854	11.38
SC_Hipp-NeuNpos_2C	867	104383	4.01	35103	7.33	5079	13.27	5844	11.42
SC_Hipp-NeuNpos_2D	802	177798	4.4	70533	7.38	10546	12.81	8530	15.07
SC_Hipp-NeuNpos_2E	712	155520	3.31	36776	6.75	3329	12.61	7790	10.64
SC_Hipp-NeuNpos_2F	863	145447	3.09	29843	6.63	2198	13.56	7492	9.59
SC_Hipp-NeuNpos_2G	583	96578	2.79	15289	6.51	883	13.2	5682	7.73
SC_Hipp-NeuNpos_3B	831	158176	3.62	45980	6.81	3805	13.64	7991	12.23
SC_Hipp-NeuNpos_3C	564	63926	2.46	6756	6.09	236	13.43	4105	6.3
SC_Hipp-NeuNpos_3D	454	131943	2.74	19568	6.25	767	16.18	7117	8.67
SC_Hipp-NeuNpos_3E	844	553556	2.18	39947	6.82	2029	24.8	15570	15.65
SC_Hipp-NeuNpos_3F	951	221500	2.66	28284	6.34	1009	22.43	9776	10.23
SC_Hipp-NeuNpos_3G	481	93548	3.25	21448	6.7	1796	13.04	5353	9.43
