# Supplementary material for: RETrace: simultaneous retrospective lineage tracing and methylation profiling of single cells
Source: HighWire-hosted journal article supplement (doi:10.1101/gr.255851.119), 2020-03-03
Supplement: Supplemental_Table_S8.xlsx [file Supplemental_Table_S8.xlsx]

## Sheet: Sheet1
Supplmentary Table S8: Equal or Not distances calclated between each pair of HCT116 single cells
	1-1-F3_2-2-B1_4B	1-1-F3_2-2-B1_4C	1-1-F3_2-2-B1_4D	1-1-F3_2-2-B1_4E	1-1-F3_2-2-B1_4F	1-1-F3_2-2-B1_4G	1-1-F3_2-2-B1_5C	1-1-F3_2-2-B1_5D	1-1-F3_2-2-B1_5F	1-1-F3_2-2-B1_5G	1-1-F3_2-2-B1_6B	1-1-F3_2-2-B1_6C	1-1-F3_2-2-B1_6D	1-1-F3_2-2-B1_6E	1-1-F3_2-2-B1_6F	1-1-F3_2-2-B1_6G	2-1-A6_3-5-B2_1B	2-1-A6_3-5-B2_1C	2-1-A6_3-5-B2_1D	2-1-A6_3-5-B2_1E	2-1-A6_3-5-B2_1F	2-1-A6_3-5-B2_1G	2-1-A6_3-5-B2_2B	2-1-A6_3-5-B2_2C	2-1-A6_3-5-B2_2D	2-1-A6_3-5-B2_2E	2-1-A6_3-5-B2_2F	2-1-A6_3-5-B2_3B	2-1-A6_3-5-B2_3C	2-1-A6_3-5-B2_3D	2-1-A6_3-5-B2_3F	2-1-A6_3-5-B2_3G	2-1-A6_3-5-B3_1C	2-1-A6_3-5-B3_1D	2-1-A6_3-5-B3_1E	2-1-A6_3-5-B3_1F	2-1-A6_3-5-B3_1G	2-1-A6_3-5-B3_2B	2-1-A6_3-5-B3_2C	2-1-A6_3-5-B3_2D	2-1-A6_3-5-B3_2E	2-1-A6_3-5-B3_2F	2-1-A6_3-5-B3_2G	2-1-A6_3-5-B3_3B	2-1-A6_3-5-B3_3C	2-1-A6_3-5-B3_3D	2-1-A6_3-5-B3_3E	2-1-A6_3-5-B3_3F	2-1-G10_3-1-A2_5B
1-1-F3_2-2-B1_4B	0	0.301	0.32	0.322	0.284	0.296	0.288	0.344	0.267	0.319	0.359	0.283	0.285	0.346	0.313	0.337	0.336	0.313	0.331	0.317	0.324	0.302	0.353	0.361	0.324	0.27	0.332	0.315	0.312	0.353	0.311	0.327	0.306	0.325	0.346	0.341	0.314	0.349	0.318	0.323	0.326	0.318	0.35	0.306	0.338	0.311	0.353	0.351	0.327
1-1-F3_2-2-B1_4C	0.301	0	0.28	0.308	0.278	0.289	0.262	0.297	0.285	0.284	0.338	0.264	0.327	0.351	0.316	0.303	0.303	0.306	0.34	0.317	0.37	0.285	0.329	0.37	0.348	0.322	0.35	0.306	0.353	0.291	0.324	0.358	0.34	0.326	0.298	0.311	0.331	0.367	0.317	0.328	0.309	0.348	0.338	0.35	0.331	0.287	0.315	0.307	0.311
1-1-F3_2-2-B1_4D	0.32	0.28	0	0.287	0.266	0.257	0.296	0.33	0.291	0.316	0.35	0.265	0.338	0.349	0.32	0.289	0.313	0.349	0.303	0.309	0.359	0.313	0.33	0.301	0.339	0.337	0.306	0.33	0.28	0.463	0.297	0.339	0.336	0.351	0.307	0.322	0.314	0.341	0.289	0.306	0.31	0.304	0.326	0.307	0.301	0.324	0.303	0.319	0.331
1-1-F3_2-2-B1_4E	0.322	0.308	0.287	0	0.28	0.309	0.276	0.308	0.334	0.314	0.322	0.31	0.286	0.335	0.342	0.319	0.321	0.421	0.306	0.329	0.371	0.301	0.349	0.357	0.33	0.351	0.306	0.307	0.348	0.362	0.35	0.344	0.351	0.302	0.304	0.344	0.354	0.382	0.346	0.385	0.344	0.302	0.336	0.326	0.374	0.319	0.355	0.303	0.333
1-1-F3_2-2-B1_4F	0.284	0.278	0.266	0.28	0	0.267	0.228	0.29	0.278	0.27	0.336	0.285	0.32	0.322	0.289	0.312	0.31	0.335	0.307	0.317	0.312	0.341	0.357	0.322	0.322	0.293	0.322	0.297	0.31	0.301	0.318	0.341	0.323	0.312	0.328	0.331	0.33	0.355	0.323	0.349	0.293	0.312	0.32	0.323	0.304	0.328	0.304	0.318	0.307
1-1-F3_2-2-B1_4G	0.296	0.289	0.257	0.309	0.267	0	0.306	0.306	0.316	0.361	0.348	0.281	0.351	0.389	0.322	0.305	0.265	0.43	0.283	0.298	0.371	0.306	0.359	0.329	0.354	0.351	0.311	0.327	0.328	0.346	0.339	0.361	0.312	0.376	0.297	0.334	0.38	0.373	0.346	0.33	0.318	0.313	0.35	0.348	0.289	0.333	0.336	0.318	0.361
1-1-F3_2-2-B1_5C	0.288	0.262	0.296	0.276	0.228	0.306	0	0.235	0.28	0.32	0.31	0.272	0.248	0.305	0.297	0.307	0.301	0.302	0.274	0.306	0.296	0.307	0.304	0.328	0.323	0.307	0.299	0.31	0.318	0.287	0.29	0.352	0.301	0.328	0.289	0.289	0.336	0.298	0.307	0.316	0.295	0.319	0.335	0.338	0.296	0.318	0.318	0.313	0.306
1-1-F3_2-2-B1_5D	0.344	0.297	0.33	0.308	0.29	0.306	0.235	0	0.294	0.324	0.329	0.292	0.31	0.359	0.331	0.332	0.373	0.375	0.352	0.347	0.323	0.325	0.327	0.355	0.309	0.325	0.345	0.328	0.34	0.353	0.331	0.348	0.335	0.339	0.314	0.347	0.347	0.376	0.312	0.341	0.304	0.347	0.33	0.349	0.351	0.332	0.318	0.301	0.329
1-1-F3_2-2-B1_5F	0.267	0.285	0.291	0.334	0.278	0.316	0.28	0.294	0	0.301	0.293	0.282	0.293	0.323	0.308	0.312	0.294	0.262	0.347	0.298	0.356	0.324	0.289	0.361	0.329	0.325	0.315	0.318	0.301	0.301	0.32	0.304	0.325	0.327	0.306	0.291	0.314	0.302	0.32	0.333	0.287	0.326	0.346	0.303	0.344	0.318	0.318	0.329	0.335
1-1-F3_2-2-B1_5G	0.319	0.284	0.316	0.314	0.27	0.361	0.32	0.324	0.301	0	0.335	0.32	0.328	0.339	0.332	0.318	0.404	0.335	0.336	0.346	0.333	0.349	0.355	0.364	0.341	0.308	0.322	0.33	0.35	0.383	0.348	0.335	0.337	0.359	0.366	0.328	0.339	0.323	0.346	0.328	0.337	0.333	0.349	0.353	0.336	0.343	0.362	0.365	0.339
1-1-F3_2-2-B1_6B	0.359	0.338	0.35	0.322	0.336	0.348	0.31	0.329	0.293	0.335	0	0.272	0.279	0.289	0.293	0.288	0.269	0.239	0.373	0.307	0.266	0.354	0.301	0.295	0.329	0.323	0.316	0.338	0.337	0.373	0.324	0.323	0.344	0.395	0.298	0.288	0.34	0.338	0.313	0.297	0.322	0.295	0.315	0.328	0.324	0.309	0.311	0.294	0.371
1-1-F3_2-2-B1_6C	0.283	0.264	0.265	0.31	0.285	0.281	0.272	0.292	0.282	0.32	0.272	0	0.279	0.308	0.287	0.261	0.318	0.315	0.241	0.309	0.332	0.318	0.33	0.339	0.302	0.29	0.291	0.309	0.285	0.329	0.287	0.306	0.338	0.325	0.313	0.308	0.324	0.346	0.305	0.302	0.297	0.304	0.298	0.33	0.311	0.31	0.31	0.319	0.33
1-1-F3_2-2-B1_6D	0.285	0.327	0.338	0.286	0.32	0.351	0.248	0.31	0.293	0.328	0.279	0.279	0	0.328	0.348	0.326	0.338	0.291	0.347	0.334	0.353	0.352	0.359	0.356	0.371	0.345	0.306	0.315	0.314	0.302	0.358	0.336	0.32	0.299	0.294	0.296	0.333	0.314	0.34	0.324	0.318	0.35	0.343	0.328	0.37	0.301	0.331	0.354	0.328
1-1-F3_2-2-B1_6E	0.346	0.351	0.349	0.335	0.322	0.389	0.305	0.359	0.323	0.339	0.289	0.308	0.328	0	0.335	0.315	0.286	0.404	0.366	0.366	0.32	0.366	0.355	0.385	0.305	0.35	0.367	0.318	0.357	0.432	0.363	0.326	0.353	0.396	0.371	0.389	0.384	0.408	0.358	0.329	0.335	0.349	0.363	0.386	0.403	0.351	0.354	0.355	0.359
1-1-F3_2-2-B1_6F	0.313	0.316	0.32	0.342	0.289	0.322	0.297	0.331	0.308	0.332	0.293	0.287	0.348	0.335	0	0.335	0.347	0.333	0.325	0.341	0.337	0.329	0.346	0.321	0.331	0.316	0.352	0.301	0.321	0.331	0.316	0.316	0.314	0.338	0.345	0.314	0.31	0.315	0.327	0.308	0.307	0.3	0.327	0.322	0.33	0.315	0.297	0.319	0.35
1-1-F3_2-2-B1_6G	0.337	0.303	0.289	0.319	0.312	0.305	0.307	0.332	0.312	0.318	0.288	0.261	0.326	0.315	0.335	0	0.299	0.362	0.367	0.323	0.364	0.336	0.358	0.323	0.342	0.305	0.288	0.257	0.304	0.345	0.321	0.305	0.345	0.368	0.305	0.36	0.342	0.368	0.298	0.348	0.317	0.312	0.323	0.304	0.355	0.318	0.333	0.32	0.32
2-1-A6_3-5-B2_1B	0.336	0.303	0.313	0.321	0.31	0.265	0.301	0.373	0.294	0.404	0.269	0.318	0.338	0.286	0.347	0.299	0	0.284	0.373	0.238	0.257	0.3	0.273	0.303	0.312	0.27	0.311	0.215	0.302	0.238	0.257	0.344	0.339	0.314	0.308	0.321	0.302	0.345	0.275	0.339	0.247	0.277	0.26	0.278	0.283	0.321	0.329	0.259	0.311
2-1-A6_3-5-B2_1C	0.313	0.306	0.349	0.421	0.335	0.43	0.302	0.375	0.262	0.335	0.239	0.315	0.291	0.404	0.333	0.362	0.284	0	0.214	0.282	0.329	0.326	0.289	0.281	0.286	0.305	0.282	0.265	0.25	0.338	0.276	0.355	0.355	0.333	0.306	0.303	0.296	0.318	0.322	0.33	0.303	0.306	0.297	0.292	0.309	0.266	0.296	0.309	0.331
2-1-A6_3-5-B2_1D	0.331	0.34	0.303	0.306	0.307	0.283	0.274	0.352	0.347	0.336	0.373	0.241	0.347	0.366	0.325	0.367	0.373	0.214	0	0.259	0.286	0.289	0.3	0.299	0.277	0.286	0.285	0.267	0.329	0.297	0.282	0.322	0.27	0.26	0.288	0.268	0.306	0.288	0.254	0.298	0.246	0.302	0.234	0.243	0.297	0.289	0.263	0.332	0.347
2-1-A6_3-5-B2_1E	0.317	0.317	0.309	0.329	0.317	0.298	0.306	0.347	0.298	0.346	0.307	0.309	0.334	0.366	0.341	0.323	0.238	0.282	0.259	0	0.288	0.294	0.279	0.281	0.294	0.276	0.261	0.256	0.285	0.258	0.269	0.315	0.301	0.316	0.307	0.268	0.31	0.351	0.298	0.288	0.285	0.305	0.329	0.303	0.296	0.3	0.314	0.304	0.331
2-1-A6_3-5-B2_1F	0.324	0.37	0.359	0.371	0.312	0.371	0.296	0.323	0.356	0.333	0.266	0.332	0.353	0.32	0.337	0.364	0.257	0.329	0.286	0.288	0	0.285	0.257	0.313	0.312	0.279	0.307	0.274	0.292	0.323	0.312	0.319	0.324	0.325	0.354	0.299	0.324	0.319	0.303	0.299	0.292	0.312	0.307	0.298	0.28	0.296	0.317	0.256	0.404
2-1-A6_3-5-B2_1G	0.302	0.285	0.313	0.301	0.341	0.306	0.307	0.325	0.324	0.349	0.354	0.318	0.352	0.366	0.329	0.336	0.3	0.326	0.289	0.294	0.285	0	0.296	0.307	0.302	0.265	0.285	0.273	0.292	0.344	0.285	0.343	0.317	0.284	0.301	0.267	0.293	0.33	0.309	0.281	0.279	0.272	0.282	0.307	0.319	0.285	0.283	0.311	0.347
2-1-A6_3-5-B2_2B	0.353	0.329	0.33	0.349	0.357	0.359	0.304	0.327	0.289	0.355	0.301	0.33	0.359	0.355	0.346	0.358	0.273	0.289	0.3	0.279	0.257	0.296	0	0.313	0.282	0.25	0.289	0.263	0.294	0.273	0.29	0.339	0.327	0.319	0.347	0.305	0.309	0.307	0.293	0.295	0.285	0.297	0.281	0.289	0.35	0.286	0.322	0.298	0.312
2-1-A6_3-5-B2_2C	0.361	0.37	0.301	0.357	0.322	0.329	0.328	0.355	0.361	0.364	0.295	0.339	0.356	0.385	0.321	0.323	0.303	0.281	0.299	0.281	0.313	0.307	0.313	0	0.303	0.297	0.281	0.31	0.274	0.324	0.281	0.288	0.298	0.309	0.345	0.298	0.319	0.336	0.288	0.312	0.278	0.29	0.321	0.295	0.317	0.295	0.278	0.339	0.336
2-1-A6_3-5-B2_2D	0.324	0.348	0.339	0.33	0.322	0.354	0.323	0.309	0.329	0.341	0.329	0.302	0.371	0.305	0.331	0.342	0.312	0.286	0.277	0.294	0.312	0.302	0.282	0.303	0	0.294	0.292	0.296	0.296	0.278	0.293	0.353	0.3	0.29	0.288	0.3	0.312	0.325	0.295	0.3	0.271	0.332	0.299	0.296	0.295	0.286	0.329	0.322	0.344
2-1-A6_3-5-B2_2E	0.27	0.322	0.337	0.351	0.293	0.351	0.307	0.325	0.325	0.308	0.323	0.29	0.345	0.35	0.316	0.305	0.27	0.305	0.286	0.276	0.279	0.265	0.25	0.297	0.294	0	0.256	0.244	0.252	0.311	0.278	0.288	0.262	0.298	0.336	0.29	0.306	0.312	0.276	0.288	0.286	0.286	0.277	0.292	0.309	0.295	0.318	0.257	0.316
2-1-A6_3-5-B2_2F	0.332	0.35	0.306	0.306	0.322	0.311	0.299	0.345	0.315	0.322	0.316	0.291	0.306	0.367	0.352	0.288	0.311	0.282	0.285	0.261	0.307	0.285	0.289	0.281	0.292	0.256	0	0.267	0.264	0.322	0.271	0.279	0.307	0.288	0.259	0.294	0.316	0.35	0.293	0.304	0.281	0.276	0.306	0.275	0.307	0.277	0.298	0.295	0.315
2-1-A6_3-5-B2_3B	0.315	0.306	0.33	0.307	0.297	0.327	0.31	0.328	0.318	0.33	0.338	0.309	0.315	0.318	0.301	0.257	0.215	0.265	0.267	0.256	0.274	0.273	0.263	0.31	0.296	0.244	0.267	0	0.288	0.254	0.254	0.249	0.278	0.255	0.285	0.26	0.307	0.293	0.271	0.278	0.264	0.288	0.269	0.263	0.311	0.266	0.286	0.281	0.315
2-1-A6_3-5-B2_3C	0.312	0.353	0.28	0.348	0.31	0.328	0.318	0.34	0.301	0.35	0.337	0.285	0.314	0.357	0.321	0.304	0.302	0.25	0.329	0.285	0.292	0.292	0.294	0.274	0.296	0.252	0.264	0.288	0	0.277	0.287	0.338	0.31	0.337	0.334	0.304	0.323	0.336	0.272	0.276	0.298	0.304	0.286	0.286	0.293	0.29	0.301	0.288	0.34
2-1-A6_3-5-B2_3D	0.353	0.291	0.463	0.362	0.301	0.346	0.287	0.353	0.301	0.383	0.373	0.329	0.302	0.432	0.331	0.345	0.238	0.338	0.297	0.258	0.323	0.344	0.273	0.324	0.278	0.311	0.322	0.254	0.277	0	0.295	0.281	0.336	0.379	0.292	0.278	0.309	0.35	0.318	0.34	0.288	0.267	0.327	0.316	0.347	0.359	0.351	0.295	0.318
2-1-A6_3-5-B2_3F	0.311	0.324	0.297	0.35	0.318	0.339	0.29	0.331	0.32	0.348	0.324	0.287	0.358	0.363	0.316	0.321	0.257	0.276	0.282	0.269	0.312	0.285	0.29	0.281	0.293	0.278	0.271	0.254	0.287	0.295	0	0.289	0.281	0.311	0.329	0.288	0.312	0.318	0.294	0.262	0.289	0.293	0.282	0.289	0.317	0.287	0.286	0.278	0.318
2-1-A6_3-5-B2_3G	0.327	0.358	0.339	0.344	0.341	0.361	0.352	0.348	0.304	0.335	0.323	0.306	0.336	0.326	0.316	0.305	0.344	0.355	0.322	0.315	0.319	0.343	0.339	0.288	0.353	0.288	0.279	0.249	0.338	0.281	0.289	0	0.308	0.325	0.327	0.335	0.31	0.352	0.298	0.379	0.295	0.319	0.293	0.27	0.34	0.316	0.326	0.314	0.318
2-1-A6_3-5-B3_1C	0.306	0.34	0.336	0.351	0.323	0.312	0.301	0.335	0.325	0.337	0.344	0.338	0.32	0.353	0.314	0.345	0.339	0.355	0.27	0.301	0.324	0.317	0.327	0.298	0.3	0.262	0.307	0.278	0.31	0.336	0.281	0.308	0	0.322	0.274	0.274	0.284	0.277	0.273	0.282	0.271	0.298	0.267	0.261	0.293	0.27	0.272	0.271	0.312
2-1-A6_3-5-B3_1D	0.325	0.326	0.351	0.302	0.312	0.376	0.328	0.339	0.327	0.359	0.395	0.325	0.299	0.396	0.338	0.368	0.314	0.333	0.26	0.316	0.325	0.284	0.319	0.309	0.29	0.298	0.288	0.255	0.337	0.379	0.311	0.325	0.322	0	0.349	0.269	0.315	0.351	0.32	0.285	0.288	0.294	0.339	0.286	0.282	0.299	0.261	0.302	0.352
2-1-A6_3-5-B3_1E	0.346	0.298	0.307	0.304	0.328	0.297	0.289	0.314	0.306	0.366	0.298	0.313	0.294	0.371	0.345	0.305	0.308	0.306	0.288	0.307	0.354	0.301	0.347	0.345	0.288	0.336	0.259	0.285	0.334	0.292	0.329	0.327	0.274	0.349	0	0.297	0.294	0.326	0.317	0.32	0.265	0.303	0.278	0.284	0.343	0.254	0.304	0.296	0.365
2-1-A6_3-5-B3_1F	0.341	0.311	0.322	0.344	0.331	0.334	0.289	0.347	0.291	0.328	0.288	0.308	0.296	0.389	0.314	0.36	0.321	0.303	0.268	0.268	0.299	0.267	0.305	0.298	0.3	0.29	0.294	0.26	0.304	0.278	0.288	0.335	0.274	0.269	0.297	0	0.291	0.321	0.275	0.263	0.249	0.267	0.28	0.283	0.281	0.272	0.269	0.256	0.315
2-1-A6_3-5-B3_1G	0.314	0.331	0.314	0.354	0.33	0.38	0.336	0.347	0.314	0.339	0.34	0.324	0.333	0.384	0.31	0.342	0.302	0.296	0.306	0.31	0.324	0.293	0.309	0.319	0.312	0.306	0.316	0.307	0.323	0.309	0.312	0.31	0.284	0.315	0.294	0.291	0	0.317	0.284	0.289	0.28	0.311	0.278	0.289	0.294	0.282	0.275	0.326	0.335
2-1-A6_3-5-B3_2B	0.349	0.367	0.341	0.382	0.355	0.373	0.298	0.376	0.302	0.323	0.338	0.346	0.314	0.408	0.315	0.368	0.345	0.318	0.288	0.351	0.319	0.33	0.307	0.336	0.325	0.312	0.35	0.293	0.336	0.35	0.318	0.352	0.277	0.351	0.326	0.321	0.317	0	0.321	0.281	0.246	0.32	0.328	0.275	0.276	0.242	0.31	0.259	0.292
2-1-A6_3-5-B3_2C	0.318	0.317	0.289	0.346	0.323	0.346	0.307	0.312	0.32	0.346	0.313	0.305	0.34	0.358	0.327	0.298	0.275	0.322	0.254	0.298	0.303	0.309	0.293	0.288	0.295	0.276	0.293	0.271	0.272	0.318	0.294	0.298	0.273	0.32	0.317	0.275	0.284	0.321	0	0.272	0.254	0.271	0.269	0.297	0.301	0.278	0.292	0.273	0.334
2-1-A6_3-5-B3_2D	0.323	0.328	0.306	0.385	0.349	0.33	0.316	0.341	0.333	0.328	0.297	0.302	0.324	0.329	0.308	0.348	0.339	0.33	0.298	0.288	0.299	0.281	0.295	0.312	0.3	0.288	0.304	0.278	0.276	0.34	0.262	0.379	0.282	0.285	0.32	0.263	0.289	0.281	0.272	0	0.264	0.284	0.283	0.269	0.301	0.255	0.266	0.282	0.331
2-1-A6_3-5-B3_2E	0.326	0.309	0.31	0.344	0.293	0.318	0.295	0.304	0.287	0.337	0.322	0.297	0.318	0.335	0.307	0.317	0.247	0.303	0.246	0.285	0.292	0.279	0.285	0.278	0.271	0.286	0.281	0.264	0.298	0.288	0.289	0.295	0.271	0.288	0.265	0.249	0.28	0.246	0.254	0.264	0	0.285	0.263	0.252	0.256	0.23	0.265	0.255	0.315
2-1-A6_3-5-B3_2F	0.318	0.348	0.304	0.302	0.312	0.313	0.319	0.347	0.326	0.333	0.295	0.304	0.35	0.349	0.3	0.312	0.277	0.306	0.302	0.305	0.312	0.272	0.297	0.29	0.332	0.286	0.276	0.288	0.304	0.267	0.293	0.319	0.298	0.294	0.303	0.267	0.311	0.32	0.271	0.284	0.285	0	0.284	0.273	0.299	0.254	0.265	0.271	0.305
2-1-A6_3-5-B3_2G	0.35	0.338	0.326	0.336	0.32	0.35	0.335	0.33	0.346	0.349	0.315	0.298	0.343	0.363	0.327	0.323	0.26	0.297	0.234	0.329	0.307	0.282	0.281	0.321	0.299	0.277	0.306	0.269	0.286	0.327	0.282	0.293	0.267	0.339	0.278	0.28	0.278	0.328	0.269	0.283	0.263	0.284	0	0.278	0.305	0.292	0.28	0.28	0.317
2-1-A6_3-5-B3_3B	0.306	0.35	0.307	0.326	0.323	0.348	0.338	0.349	0.303	0.353	0.328	0.33	0.328	0.386	0.322	0.304	0.278	0.292	0.243	0.303	0.298	0.307	0.289	0.295	0.296	0.292	0.275	0.263	0.286	0.316	0.289	0.27	0.261	0.286	0.284	0.283	0.289	0.275	0.297	0.269	0.252	0.273	0.278	0	0.289	0.269	0.252	0.25	0.302
2-1-A6_3-5-B3_3C	0.338	0.331	0.301	0.374	0.304	0.289	0.296	0.351	0.344	0.336	0.324	0.311	0.37	0.403	0.33	0.355	0.283	0.309	0.297	0.296	0.28	0.319	0.35	0.317	0.295	0.309	0.307	0.311	0.293	0.347	0.317	0.34	0.293	0.282	0.343	0.281	0.294	0.276	0.301	0.301	0.256	0.299	0.305	0.289	0	0.263	0.286	0.283	0.324
2-1-A6_3-5-B3_3D	0.311	0.287	0.324	0.319	0.328	0.333	0.318	0.332	0.318	0.343	0.309	0.31	0.301	0.351	0.315	0.318	0.321	0.266	0.289	0.3	0.296	0.285	0.286	0.295	0.286	0.295	0.277	0.266	0.29	0.359	0.287	0.316	0.27	0.299	0.254	0.272	0.282	0.242	0.278	0.255	0.23	0.254	0.292	0.269	0.263	0	0.266	0.268	0.313
2-1-A6_3-5-B3_3E	0.353	0.315	0.303	0.355	0.304	0.336	0.318	0.318	0.318	0.362	0.311	0.31	0.331	0.354	0.297	0.333	0.329	0.296	0.263	0.314	0.317	0.283	0.322	0.278	0.329	0.318	0.298	0.286	0.301	0.351	0.286	0.326	0.272	0.261	0.304	0.269	0.275	0.31	0.292	0.266	0.265	0.265	0.28	0.252	0.286	0.266	0	0.269	0.299
2-1-A6_3-5-B3_3F	0.351	0.307	0.319	0.303	0.318	0.318	0.313	0.301	0.329	0.365	0.294	0.319	0.354	0.355	0.319	0.32	0.259	0.309	0.332	0.304	0.256	0.311	0.298	0.339	0.322	0.257	0.295	0.281	0.288	0.295	0.278	0.314	0.271	0.302	0.296	0.256	0.326	0.259	0.273	0.282	0.255	0.271	0.28	0.25	0.283	0.268	0.269	0	0.296
2-1-G10_3-1-A2_5B	0.327	0.311	0.331	0.333	0.307	0.361	0.306	0.329	0.335	0.339	0.371	0.33	0.328	0.359	0.35	0.32	0.311	0.331	0.347	0.331	0.404	0.347	0.312	0.336	0.344	0.316	0.315	0.315	0.34	0.318	0.318	0.318	0.312	0.352	0.365	0.315	0.335	0.292	0.334	0.331	0.315	0.305	0.317	0.302	0.324	0.313	0.299	0.296	0
2-1-G10_3-1-A2_5C	0.309	0.307	0.311	0.354	0.289	0.327	0.292	0.32	0.329	0.321	0.377	0.29	0.305	0.361	0.31	0.333	0.309	0.374	0.289	0.307	0.331	0.342	0.327	0.324	0.316	0.301	0.305	0.308	0.314	0.336	0.327	0.361	0.308	0.332	0.326	0.312	0.328	0.31	0.309	0.328	0.304	0.305	0.323	0.309	0.319	0.298	0.298	0.316	0.24
2-1-G10_3-1-A2_5D	0.352	0.34	0.298	0.348	0.346	0.365	0.333	0.351	0.318	0.376	0.314	0.331	0.348	0.375	0.361	0.338	0.335	0.329	0.344	0.294	0.328	0.352	0.339	0.326	0.327	0.327	0.315	0.295	0.352	0.276	0.303	0.351	0.325	0.349	0.336	0.333	0.352	0.339	0.348	0.365	0.317	0.334	0.332	0.293	0.305	0.294	0.347	0.318	0.255
2-1-G10_3-1-A2_5F	0.301	0.332	0.34	0.358	0.305	0.354	0.3	0.343	0.321	0.353	0.32	0.331	0.392	0.359	0.322	0.363	0.366	0.353	0.277	0.316	0.326	0.318	0.309	0.345	0.346	0.321	0.306	0.302	0.357	0.375	0.311	0.321	0.332	0.286	0.363	0.32	0.343	0.329	0.345	0.328	0.304	0.325	0.325	0.302	0.343	0.32	0.315	0.317	0.273
2-1-G10_3-1-A2_5G	0.35	0.319	0.316	0.377	0.319	0.331	0.319	0.356	0.293	0.379	0.318	0.29	0.341	0.346	0.294	0.325	0.332	0.389	0.303	0.317	0.354	0.333	0.345	0.335	0.349	0.314	0.332	0.313	0.306	0.304	0.32	0.36	0.321	0.316	0.289	0.326	0.326	0.344	0.32	0.335	0.296	0.332	0.329	0.315	0.306	0.329	0.316	0.318	0.281
2-1-G10_3-1-A2_6B	0.329	0.274	0.321	0.316	0.363	0.345	0.326	0.329	0.317	0.347	0.308	0.308	0.347	0.337	0.369	0.309	0.307	0.416	0.325	0.316	0.34	0.322	0.32	0.328	0.328	0.293	0.322	0.298	0.317	0.31	0.303	0.416	0.314	0.292	0.298	0.321	0.334	0.389	0.314	0.305	0.326	0.319	0.349	0.31	0.326	0.296	0.346	0.322	0.255
2-1-G10_3-1-A2_6C	0.345	0.338	0.39	0.318	0.326	0.33	0.334	0.368	0.334	0.358	0.289	0.307	0.332	0.386	0.346	0.344	0.339	0.409	0.345	0.316	0.353	0.37	0.349	0.357	0.38	0.322	0.322	0.347	0.36	0.298	0.313	0.354	0.308	0.349	0.356	0.322	0.331	0.347	0.35	0.321	0.302	0.324	0.317	0.339	0.341	0.343	0.291	0.31	0.27
2-1-G10_3-1-A2_6D	0.35	0.327	0.276	0.362	0.328	0.331	0.286	0.37	0.352	0.351	0.333	0.347	0.342	0.352	0.34	0.33	0.333	0.358	0.35	0.342	0.354	0.343	0.337	0.326	0.357	0.31	0.322	0.342	0.349	0.361	0.335	0.344	0.351	0.372	0.333	0.344	0.36	0.367	0.305	0.33	0.304	0.291	0.368	0.319	0.359	0.294	0.34	0.342	0.288
2-1-G10_3-1-A2_6E	0.329	0.324	0.308	0.363	0.332	0.313	0.333	0.344	0.339	0.33	0.299	0.316	0.349	0.331	0.332	0.324	0.276	0.31	0.345	0.324	0.301	0.326	0.342	0.343	0.348	0.292	0.312	0.271	0.295	0.307	0.32	0.3	0.321	0.336	0.314	0.328	0.331	0.318	0.324	0.351	0.309	0.31	0.324	0.326	0.31	0.326	0.293	0.304	0.238
2-1-G10_3-1-A2_6F	0.339	0.319	0.339	0.348	0.343	0.319	0.305	0.333	0.315	0.311	0.283	0.33	0.347	0.366	0.35	0.305	0.297	0.316	0.355	0.31	0.323	0.306	0.323	0.324	0.333	0.334	0.316	0.304	0.311	0.333	0.325	0.347	0.322	0.363	0.288	0.298	0.342	0.338	0.306	0.35	0.314	0.321	0.32	0.312	0.338	0.324	0.325	0.319	0.29
2-1-G10_3-1-A2_6G	0.365	0.329	0.302	0.343	0.305	0.334	0.276	0.311	0.343	0.336	0.3	0.333	0.344	0.337	0.332	0.355	0.364	0.308	0.285	0.314	0.349	0.322	0.343	0.335	0.352	0.311	0.343	0.308	0.315	0.399	0.318	0.311	0.296	0.322	0.341	0.309	0.296	0.361	0.303	0.336	0.305	0.311	0.332	0.332	0.319	0.328	0.315	0.347	0.288
2-1-G10_3-1-B1_7B	0.305	0.31	0.322	0.337	0.312	0.298	0.245	0.304	0.332	0.348	0.31	0.298	0.296	0.329	0.331	0.309	0.331	0.32	0.346	0.328	0.333	0.302	0.336	0.32	0.348	0.326	0.316	0.306	0.305	0.309	0.267	0.302	0.331	0.294	0.29	0.294	0.309	0.348	0.314	0.321	0.308	0.3	0.327	0.316	0.342	0.309	0.317	0.313	0.299
2-1-G10_3-1-B1_7C	0.317	0.305	0.317	0.337	0.292	0.343	0.3	0.328	0.306	0.313	0.318	0.304	0.313	0.367	0.351	0.318	0.323	0.323	0.287	0.327	0.316	0.329	0.31	0.32	0.301	0.304	0.311	0.31	0.337	0.323	0.328	0.339	0.315	0.34	0.293	0.308	0.333	0.339	0.315	0.344	0.316	0.312	0.319	0.311	0.31	0.333	0.331	0.338	0.285
2-1-G10_3-1-B1_7D	0.365	0.311	0.343	0.33	0.309	0.337	0.331	0.341	0.353	0.347	0.319	0.318	0.34	0.351	0.348	0.365	0.323	0.346	0.305	0.317	0.323	0.323	0.323	0.316	0.33	0.318	0.325	0.306	0.338	0.318	0.32	0.343	0.338	0.351	0.331	0.345	0.346	0.366	0.335	0.347	0.304	0.332	0.33	0.32	0.323	0.328	0.321	0.31	0.315
2-1-G10_3-1-B1_7E	0.354	0.306	0.332	0.302	0.362	0.366	0.335	0.358	0.301	0.354	0.339	0.284	0.325	0.336	0.358	0.372	0.328	0.354	0.354	0.331	0.357	0.346	0.324	0.339	0.353	0.32	0.307	0.301	0.309	0.319	0.341	0.276	0.32	0.363	0.291	0.299	0.34	0.355	0.329	0.371	0.296	0.314	0.302	0.354	0.344	0.328	0.328	0.327	0.314
2-1-G10_3-1-B1_7F	0.305	0.303	0.288	0.362	0.332	0.309	0.312	0.354	0.314	0.358	0.322	0.288	0.313	0.346	0.3	0.265	0.327	0.328	0.313	0.326	0.339	0.329	0.329	0.322	0.324	0.319	0.318	0.311	0.335	0.299	0.288	0.333	0.315	0.353	0.335	0.316	0.334	0.334	0.325	0.349	0.3	0.304	0.321	0.319	0.345	0.307	0.303	0.317	0.27
2-1-G10_3-1-B1_7G	0.322	0.312	0.344	0.35	0.334	0.303	0.345	0.329	0.328	0.361	0.361	0.286	0.333	0.378	0.339	0.33	0.288	0.368	0.335	0.318	0.338	0.345	0.389	0.346	0.345	0.321	0.299	0.311	0.329	0.337	0.319	0.331	0.322	0.359	0.319	0.303	0.352	0.349	0.313	0.325	0.297	0.311	0.329	0.313	0.326	0.335	0.329	0.301	0.274
2-1-G10_3-1-B1_8B	0.303	0.309	0.364	0.335	0.318	0.346	0.29	0.363	0.259	0.325	0.278	0.302	0.316	0.307	0.29	0.295	0.304	0.239	0.378	0.298	0.342	0.344	0.283	0.336	0.296	0.32	0.291	0.29	0.313	0.33	0.337	0.318	0.308	0.321	0.345	0.295	0.324	0.314	0.308	0.32	0.304	0.348	0.303	0.302	0.29	0.331	0.358	0.296	0.287
2-1-G10_3-1-B1_8C	0.356	0.346	0.34	0.332	0.326	0.36	0.318	0.344	0.314	0.37	0.335	0.284	0.344	0.362	0.321	0.344	0.319	0.331	0.311	0.344	0.323	0.325	0.37	0.333	0.336	0.314	0.321	0.327	0.339	0.404	0.323	0.326	0.339	0.334	0.319	0.348	0.348	0.364	0.335	0.331	0.318	0.339	0.328	0.315	0.319	0.315	0.352	0.315	0.276
2-1-G10_3-1-B1_8D	0.278	0.256	0.272	0.288	0.327	0.305	0.295	0.277	0.272	0.345	0.331	0.27	0.306	0.327	0.288	0.293	0.26	0.348	0.223	0.293	0.298	0.256	0.295	0.338	0.258	0.289	0.3	0.324	0.291	0.353	0.316	0.341	0.308	0.341	0.282	0.298	0.29	0.362	0.251	0.286	0.306	0.304	0.309	0.331	0.305	0.31	0.295	0.291	0.31
2-1-G10_3-1-B1_8F	0.274	0.299	0.272	0.335	0.3	0.358	0.288	0.339	0.297	0.317	0.286	0.298	0.303	0.359	0.312	0.302	0.283	0.319	0.335	0.301	0.349	0.331	0.3	0.351	0.346	0.312	0.322	0.279	0.325	0.351	0.296	0.314	0.318	0.355	0.314	0.321	0.352	0.329	0.312	0.31	0.331	0.31	0.345	0.332	0.322	0.31	0.304	0.327	0.307
2-1-G10_3-1-B1_9B	0.354	0.347	0.364	0.341	0.335	0.351	0.314	0.293	0.292	0.353	0.363	0.282	0.35	0.344	0.322	0.344	0.411	0.319	0.262	0.318	0.348	0.326	0.353	0.292	0.33	0.305	0.309	0.283	0.33	0.306	0.297	0.295	0.335	0.349	0.346	0.322	0.331	0.344	0.331	0.333	0.326	0.326	0.35	0.32	0.344	0.305	0.346	0.291	0.243
2-1-G10_3-1-B1_9C	0.421	0.302	0.383	0.361	0.286	0.284	0.296	0.363	0.321	0.324	0.283	0.325	0.337	0.365	0.304	0.319	0.311	0.315	0.291	0.326	0.307	0.35	0.341	0.329	0.39	0.348	0.324	0.306	0.346	0.288	0.319	0.357	0.347	0.395	0.311	0.32	0.306	0.315	0.343	0.334	0.266	0.352	0.348	0.364	0.352	0.301	0.334	0.333	0.277
2-1-G10_3-1-B1_9D	0.346	0.304	0.328	0.338	0.325	0.299	0.342	0.36	0.32	0.331	0.315	0.314	0.334	0.357	0.326	0.305	0.275	0.317	0.318	0.293	0.333	0.326	0.316	0.316	0.333	0.293	0.281	0.305	0.323	0.324	0.291	0.312	0.316	0.335	0.358	0.323	0.332	0.342	0.323	0.328	0.294	0.312	0.317	0.303	0.315	0.316	0.313	0.298	0.265
2-1-G10_3-1-B1_9E	0.296	0.349	0.292	0.393	0.291	0.355	0.281	0.344	0.334	0.311	0.309	0.31	0.357	0.372	0.346	0.359	0.326	0.308	0.317	0.324	0.307	0.333	0.331	0.35	0.331	0.337	0.321	0.337	0.321	0.346	0.321	0.304	0.318	0.365	0.305	0.316	0.326	0.345	0.338	0.337	0.324	0.349	0.34	0.347	0.316	0.327	0.341	0.319	0.286
2-1-G10_3-1-B1_9F	0.357	0.318	0.324	0.312	0.31	0.304	0.3	0.309	0.291	0.329	0.281	0.273	0.339	0.321	0.321	0.307	0.31	0.311	0.286	0.281	0.333	0.323	0.34	0.332	0.305	0.27	0.292	0.284	0.311	0.337	0.31	0.317	0.286	0.333	0.319	0.276	0.304	0.32	0.304	0.303	0.317	0.271	0.292	0.288	0.32	0.305	0.334	0.295	0.253
2-1-G10_3-1-B1_9G	0.304	0.331	0.32	0.359	0.337	0.349	0.351	0.356	0.329	0.352	0.346	0.326	0.296	0.365	0.35	0.361	0.306	0.352	0.277	0.327	0.379	0.346	0.365	0.339	0.348	0.374	0.33	0.305	0.294	0.398	0.311	0.369	0.306	0.325	0.369	0.325	0.349	0.409	0.333	0.343	0.346	0.318	0.329	0.315	0.354	0.322	0.302	0.359	0.285
2-1-H7_3-6-C6_10B	0.346	0.367	0.328	0.348	0.356	0.354	0.316	0.362	0.347	0.373	0.288	0.339	0.375	0.42	0.365	0.36	0.277	0.381	0.301	0.33	0.327	0.363	0.335	0.325	0.353	0.299	0.323	0.309	0.318	0.229	0.32	0.292	0.356	0.379	0.318	0.352	0.349	0.3	0.33	0.353	0.304	0.323	0.321	0.305	0.312	0.327	0.356	0.33	0.358
2-1-H7_3-6-C6_10C	0.325	0.307	0.297	0.343	0.321	0.308	0.31	0.308	0.306	0.301	0.287	0.301	0.295	0.328	0.325	0.346	0.324	0.343	0.252	0.3	0.275	0.302	0.304	0.291	0.298	0.32	0.271	0.291	0.317	0.257	0.343	0.366	0.3	0.332	0.297	0.31	0.323	0.291	0.306	0.289	0.272	0.267	0.287	0.275	0.29	0.334	0.279	0.314	0.295
2-1-H7_3-6-C6_10D	0.371	0.336	0.384	0.324	0.388	0.357	0.331	0.332	0.364	0.363	0.307	0.328	0.373	0.342	0.338	0.29	0.344	0.309	0.351	0.351	0.338	0.363	0.341	0.326	0.347	0.329	0.319	0.324	0.286	0.33	0.294	0.308	0.329	0.326	0.349	0.336	0.317	0.353	0.359	0.309	0.298	0.307	0.324	0.304	0.311	0.295	0.322	0.321	0.365
2-1-H7_3-6-C6_10E	0.348	0.332	0.35	0.374	0.322	0.361	0.307	0.337	0.368	0.335	0.376	0.311	0.367	0.377	0.323	0.342	0.27	0.402	0.259	0.305	0.34	0.314	0.31	0.326	0.306	0.296	0.306	0.286	0.343	0.364	0.33	0.371	0.304	0.344	0.345	0.327	0.347	0.306	0.318	0.329	0.288	0.312	0.315	0.321	0.304	0.308	0.312	0.297	0.335
2-1-H7_3-6-C6_10F	0.366	0.32	0.347	0.353	0.344	0.347	0.296	0.32	0.304	0.343	0.329	0.337	0.362	0.367	0.345	0.325	0.293	0.3	0.435	0.324	0.363	0.364	0.301	0.303	0.344	0.303	0.313	0.282	0.294	0.349	0.312	0.335	0.342	0.342	0.357	0.316	0.4	0.371	0.304	0.356	0.305	0.287	0.319	0.342	0.321	0.327	0.313	0.314	0.331
2-1-H7_3-6-C6_10G	0.33	0.329	0.352	0.397	0.327	0.325	0.376	0.375	0.344	0.315	0.337	0.359	0.392	0.403	0.33	0.343	0.321	0.324	0.333	0.322	0.39	0.335	0.379	0.404	0.337	0.332	0.339	0.35	0.346	0.431	0.302	0.423	0.36	0.34	0.361	0.345	0.359	0.367	0.37	0.363	0.33	0.355	0.275	0.332	0.313	0.357	0.333	0.316	0.351
2-1-H7_3-6-C6_11B	0.379	0.362	0.282	0.366	0.302	0.344	0.322	0.309	0.342	0.34	0.317	0.303	0.371	0.38	0.331	0.368	0.256	0.333	0.223	0.319	0.312	0.365	0.33	0.318	0.3	0.319	0.319	0.316	0.304	0.32	0.341	0.333	0.308	0.36	0.391	0.298	0.343	0.351	0.346	0.291	0.32	0.301	0.352	0.322	0.363	0.325	0.313	0.333	0.288
2-1-H7_3-6-C6_11C	0.31	0.301	0.322	0.344	0.319	0.332	0.305	0.325	0.311	0.323	0.343	0.303	0.363	0.345	0.345	0.372	0.26	0.332	0.33	0.299	0.37	0.307	0.332	0.338	0.291	0.32	0.3	0.311	0.314	0.347	0.298	0.337	0.313	0.317	0.309	0.307	0.352	0.333	0.273	0.289	0.272	0.325	0.296	0.273	0.304	0.286	0.301	0.324	0.349
2-1-H7_3-6-C6_11E	0.356	0.328	0.291	0.385	0.33	0.332	0.357	0.343	0.281	0.355	0.333	0.309	0.333	0.369	0.313	0.331	0.262	0.263	0.338	0.308	0.327	0.315	0.321	0.376	0.321	0.317	0.278	0.326	0.349	0.368	0.308	0.344	0.287	0.296	0.354	0.299	0.347	0.332	0.315	0.293	0.312	0.304	0.297	0.287	0.308	0.319	0.297	0.292	0.338
2-1-H7_3-6-C6_11F	0.315	0.303	0.3	0.338	0.289	0.327	0.3	0.336	0.297	0.317	0.285	0.298	0.339	0.344	0.306	0.325	0.278	0.302	0.336	0.316	0.288	0.304	0.314	0.331	0.306	0.291	0.309	0.269	0.294	0.332	0.305	0.335	0.325	0.286	0.292	0.295	0.307	0.351	0.304	0.289	0.278	0.292	0.301	0.3	0.304	0.298	0.277	0.283	0.306
2-1-H7_3-6-C6_12B	0.388	0.271	0.296	0.421	0.331	0.386	0.309	0.342	0.34	0.376	0.347	0.299	0.396	0.368	0.3	0.391	0.367	0.359	0.405	0.329	0.349	0.304	0.316	0.35	0.363	0.3	0.271	0.355	0.363	0.323	0.304	0.312	0.326	0.352	0.276	0.338	0.348	0.373	0.327	0.321	0.326	0.368	0.304	0.337	0.333	0.31	0.338	0.31	0.327
2-1-H7_3-6-C6_12C	0.337	0.297	0.304	0.33	0.336	0.367	0.309	0.38	0.334	0.389	0.329	0.317	0.371	0.332	0.377	0.333	0.331	0.286	0.36	0.304	0.343	0.361	0.346	0.308	0.343	0.33	0.323	0.266	0.333	0.362	0.314	0.289	0.331	0.318	0.382	0.295	0.331	0.309	0.317	0.331	0.324	0.31	0.314	0.319	0.333	0.32	0.298	0.325	0.328
2-1-H7_3-6-C6_12D	0.316	0.298	0.297	0.348	0.323	0.346	0.271	0.311	0.311	0.308	0.299	0.264	0.306	0.358	0.301	0.283	0.325	0.356	0.231	0.293	0.33	0.312	0.332	0.297	0.342	0.264	0.298	0.322	0.326	0.349	0.281	0.279	0.334	0.318	0.328	0.317	0.333	0.33	0.307	0.307	0.292	0.3	0.324	0.322	0.312	0.34	0.323	0.308	0.307
2-1-H7_3-6-C6_12E	0.354	0.37	0.339	0.348	0.34	0.328	0.311	0.332	0.312	0.333	0.29	0.325	0.349	0.375	0.353	0.326	0.333	0.336	0.26	0.303	0.33	0.364	0.263	0.289	0.33	0.307	0.296	0.286	0.324	0.333	0.308	0.333	0.323	0.379	0.263	0.31	0.325	0.317	0.302	0.293	0.275	0.283	0.289	0.299	0.339	0.287	0.34	0.287	0.291
2-1-H7_3-6-C6_12F	0.297	0.308	0.318	0.391	0.297	0.284	0.294	0.302	0.269	0.299	0.388	0.3	0.359	0.332	0.264	0.302	0.258	0.362	0.29	0.286	0.354	0.295	0.324	0.298	0.312	0.289	0.33	0.296	0.303	0.356	0.264	0.335	0.3	0.317	0.32	0.336	0.279	0.351	0.306	0.294	0.269	0.32	0.293	0.33	0.323	0.28	0.291	0.3	0.317
2-1-H7_3-6-C6_12G	0.343	0.336	0.401	0.444	0.319	0.353	0.356	0.342	0.341	0.352	0.352	0.347	0.394	0.381	0.399	0.311	0.322	0.315	0.329	0.345	0.311	0.366	0.341	0.378	0.336	0.269	0.26	0.291	0.35	0.263	0.389	0.399	0.314	0.355	0.349	0.321	0.318	0.351	0.313	0.334	0.309	0.332	0.375	0.325	0.382	0.361	0.376	0.326	0.346
2-1-H7_3-6-G7_10B	0.438	0.393	0.33	0.338	0.354	0.464	0.364	0.393	0.346	0.366	0.394	0.408	0.355	0.346	0.325	0.338	0.258	0.275	0.293	0.31	0.402	0.277	0.269	0.367	0.327	0.336	0.369	0.359	0.316	0.44	0.379	0.407	0.377	0.367	0.364	0.341	0.287	0.344	0.375	0.346	0.314	0.375	0.349	0.283	0.377	0.379	0.323	0.314	0.346
2-1-H7_3-6-G7_10G	0.348	0.337	0.315	0.39	0.366	0.31	0.311	0.308	0.343	0.34	0.312	0.283	0.436	0.369	0.366	0.326	0.265	0.268	0.226	0.317	0.325	0.273	0.31	0.293	0.375	0.318	0.313	0.324	0.309	0.267	0.289	0.344	0.283	0.328	0.317	0.277	0.309	0.308	0.321	0.341	0.276	0.303	0.27	0.337	0.351	0.283	0.266	0.281	0.319
2-1-H7_3-6-G7_11B	0.417	0.339	0.339	0.328	0.266	0.381	0.28	0.282	0.4	0.35	0.211	0.347	0.242	0.333	0.333	0.343	0.259	0.471	0.387	0.332	0.289	0.25	0.293	0.317	0.342	0.308	0.337	0.263	0.333	0.382	0.301	0.347	0.339	0.256	0.396	0.309	0.407	0.346	0.339	0.282	0.337	0.331	0.323	0.289	0.346	0.4	0.235	0.307	0.294
2-1-H7_3-6-G7_11D	0.332	0.348	0.281	0.384	0.348	0.342	0.33	0.312	0.351	0.349	0.338	0.369	0.306	0.409	0.363	0.372	0.317	0.269	0.314	0.293	0.315	0.343	0.331	0.331	0.314	0.326	0.32	0.319	0.336	0.336	0.312	0.395	0.301	0.355	0.3	0.333	0.344	0.331	0.331	0.298	0.297	0.328	0.329	0.295	0.317	0.333	0.288	0.347	0.328
2-1-H7_3-6-G7_11E	0.286	0.38	0.306	0.371	0.37	0.363	0.343	0.32	0.304	0.341	0.283	0.327	0.341	0.413	0.358	0.333	0.269	0.308	0.271	0.323	0.365	0.303	0.332	0.36	0.349	0.318	0.308	0.263	0.338	0.375	0.325	0.294	0.297	0.325	0.346	0.319	0.305	0.431	0.31	0.382	0.345	0.313	0.317	0.296	0.323	0.325	0.3	0.344	0.332
2-1-H7_3-6-G7_11G	0.275	0.338	0.349	0.396	0.312	0.333	0.305	0.302	0.308	0.302	0.364	0.331	0.321	0.422	0.274	0.357	0.289	0.383	0.261	0.301	0.365	0.264	0.331	0.338	0.363	0.314	0.332	0.343	0.31	0.375	0.32	0.333	0.33	0.364	0.333	0.272	0.29	0.365	0.307	0.286	0.249	0.362	0.277	0.295	0.346	0.33	0.245	0.314	0.362
2-1-H7_3-6-G7_12E	0.336	0.308	0.362	0.379	0.384	0.405	0.386	0.333	0.293	0.354	0.269	0.381	0.408	0.429	0.268	0.374	0.192	0.405	0.286	0.347	0.312	0.356	0.392	0.355	0.372	0.355	0.298	0.351	0.354	0.483	0.266	0.333	0.347	0.313	0.388	0.336	0.303	0.368	0.317	0.285	0.305	0.348	0.322	0.294	0.37	0.342	0.297	0.242	0.375
2-2-B1_3-2-A6_7B	0.35	0.295	0.305	0.329	0.29	0.318	0.287	0.326	0.309	0.346	0.267	0.322	0.343	0.331	0.342	0.352	0.295	0.266	0.319	0.315	0.304	0.325	0.316	0.305	0.33	0.295	0.326	0.287	0.325	0.348	0.306	0.347	0.307	0.339	0.35	0.294	0.329	0.335	0.309	0.322	0.298	0.324	0.333	0.309	0.341	0.283	0.317	0.306	0.309
2-2-B1_3-2-A6_7D	0.359	0.337	0.309	0.331	0.307	0.303	0.319	0.312	0.323	0.345	0.315	0.29	0.339	0.348	0.36	0.321	0.284	0.288	0.324	0.321	0.339	0.308	0.312	0.342	0.323	0.314	0.318	0.327	0.318	0.337	0.322	0.404	0.321	0.33	0.306	0.321	0.342	0.304	0.321	0.319	0.319	0.309	0.327	0.298	0.334	0.311	0.314	0.319	0.308
2-2-B1_3-2-A6_7E	0.337	0.3	0.311	0.35	0.292	0.304	0.299	0.309	0.297	0.275	0.284	0.281	0.306	0.307	0.303	0.36	0.298	0.295	0.386	0.32	0.333	0.322	0.333	0.301	0.346	0.294	0.315	0.301	0.318	0.236	0.304	0.354	0.292	0.346	0.33	0.301	0.304	0.301	0.318	0.304	0.287	0.293	0.298	0.301	0.32	0.311	0.309	0.314	0.294
2-2-B1_3-2-A6_7F	0.288	0.303	0.36	0.346	0.292	0.293	0.275	0.336	0.293	0.316	0.281	0.299	0.374	0.358	0.333	0.314	0.308	0.337	0.306	0.31	0.306	0.264	0.311	0.319	0.322	0.271	0.312	0.312	0.315	0.329	0.289	0.315	0.32	0.353	0.317	0.288	0.336	0.332	0.31	0.305	0.291	0.291	0.32	0.317	0.3	0.307	0.32	0.332	0.291
2-2-B1_3-2-A6_7G	0.333	0.348	0.385	0.376	0.324	0.33	0.34	0.367	0.315	0.379	0.297	0.304	0.356	0.38	0.388	0.352	0.324	0.41	0.317	0.328	0.33	0.351	0.381	0.372	0.322	0.315	0.334	0.326	0.379	0.252	0.335	0.356	0.313	0.367	0.307	0.309	0.371	0.385	0.352	0.356	0.353	0.343	0.301	0.354	0.34	0.307	0.333	0.321	0.273
2-2-B1_3-2-A6_8B	0.314	0.306	0.344	0.306	0.337	0.29	0.335	0.284	0.311	0.293	0.298	0.309	0.284	0.342	0.329	0.336	0.332	0.274	0.302	0.31	0.316	0.334	0.311	0.33	0.321	0.293	0.32	0.288	0.32	0.281	0.327	0.348	0.302	0.346	0.324	0.305	0.348	0.325	0.311	0.331	0.295	0.304	0.297	0.305	0.309	0.332	0.29	0.326	0.27
2-2-B1_3-2-A6_8C	0.32	0.307	0.315	0.319	0.296	0.344	0.296	0.323	0.324	0.336	0.324	0.312	0.304	0.34	0.371	0.311	0.323	0.339	0.282	0.305	0.344	0.301	0.303	0.33	0.331	0.314	0.332	0.302	0.313	0.328	0.273	0.302	0.31	0.342	0.326	0.329	0.324	0.27	0.325	0.311	0.279	0.313	0.325	0.314	0.29	0.3	0.315	0.332	0.338
2-2-B1_3-2-A6_8D	0.334	0.325	0.351	0.285	0.304	0.331	0.331	0.327	0.28	0.323	0.351	0.328	0.287	0.41	0.344	0.371	0.304	0.303	0.257	0.308	0.324	0.299	0.337	0.326	0.31	0.341	0.325	0.308	0.336	0.387	0.324	0.374	0.306	0.325	0.304	0.335	0.342	0.357	0.31	0.337	0.307	0.325	0.353	0.322	0.31	0.307	0.334	0.312	0.297
2-2-B1_3-2-A6_8E	0.325	0.33	0.329	0.326	0.323	0.347	0.282	0.298	0.307	0.368	0.296	0.3	0.339	0.331	0.318	0.306	0.298	0.341	0.253	0.317	0.315	0.34	0.316	0.368	0.331	0.327	0.319	0.303	0.322	0.308	0.331	0.352	0.316	0.362	0.325	0.331	0.336	0.321	0.331	0.327	0.316	0.337	0.306	0.31	0.326	0.322	0.314	0.301	0.315
2-2-B1_3-2-A6_8F	0.325	0.293	0.299	0.286	0.268	0.353	0.297	0.324	0.292	0.293	0.299	0.312	0.309	0.313	0.288	0.336	0.339	0.304	0.256	0.306	0.317	0.338	0.311	0.333	0.295	0.3	0.305	0.272	0.302	0.344	0.308	0.294	0.275	0.354	0.288	0.288	0.337	0.298	0.321	0.286	0.274	0.281	0.322	0.291	0.299	0.292	0.282	0.299	0.287
2-2-B1_3-2-A6_8G	0.341	0.304	0.322	0.337	0.308	0.372	0.303	0.372	0.351	0.334	0.276	0.31	0.36	0.381	0.333	0.283	0.319	0.254	0.341	0.326	0.342	0.313	0.302	0.357	0.302	0.3	0.326	0.321	0.307	0.322	0.327	0.34	0.318	0.341	0.353	0.281	0.36	0.286	0.319	0.301	0.328	0.324	0.326	0.325	0.297	0.311	0.33	0.274	0.31
2-2-B1_3-2-A6_9B	0.346	0.328	0.323	0.391	0.314	0.338	0.327	0.356	0.33	0.357	0.341	0.326	0.328	0.35	0.361	0.339	0.266	0.321	0.32	0.322	0.378	0.333	0.346	0.303	0.348	0.342	0.37	0.296	0.336	0.341	0.333	0.368	0.353	0.392	0.335	0.331	0.32	0.322	0.334	0.357	0.319	0.326	0.314	0.322	0.361	0.337	0.331	0.319	0.293
2-2-B1_3-2-A6_9C	0.329	0.272	0.288	0.339	0.271	0.281	0.289	0.298	0.325	0.286	0.285	0.314	0.365	0.315	0.305	0.321	0.326	0.317	0.279	0.307	0.306	0.306	0.303	0.317	0.333	0.297	0.318	0.301	0.31	0.313	0.293	0.321	0.298	0.337	0.291	0.287	0.329	0.303	0.294	0.306	0.293	0.311	0.299	0.325	0.308	0.305	0.313	0.312	0.298
2-2-B1_3-2-A6_9D	0.302	0.326	0.334	0.314	0.31	0.305	0.285	0.329	0.317	0.331	0.357	0.325	0.32	0.376	0.328	0.308	0.372	0.35	0.335	0.322	0.332	0.319	0.311	0.305	0.321	0.316	0.31	0.318	0.328	0.31	0.312	0.326	0.302	0.328	0.318	0.313	0.33	0.329	0.335	0.293	0.289	0.337	0.312	0.312	0.314	0.308	0.326	0.312	0.314
2-2-B1_3-2-A6_9E	0.296	0.335	0.323	0.358	0.344	0.368	0.286	0.348	0.346	0.354	0.354	0.312	0.361	0.369	0.341	0.341	0.364	0.396	0.405	0.314	0.336	0.34	0.327	0.326	0.334	0.309	0.312	0.302	0.302	0.363	0.304	0.342	0.285	0.359	0.327	0.306	0.365	0.314	0.323	0.296	0.279	0.349	0.324	0.311	0.327	0.288	0.311	0.294	0.328
2-2-B1_3-2-A6_9F	0.352	0.307	0.294	0.336	0.351	0.365	0.302	0.333	0.293	0.343	0.302	0.319	0.352	0.338	0.303	0.324	0.29	0.35	0.315	0.316	0.333	0.343	0.32	0.328	0.335	0.28	0.31	0.29	0.317	0.289	0.291	0.37	0.313	0.346	0.332	0.313	0.336	0.313	0.331	0.305	0.31	0.314	0.322	0.317	0.306	0.322	0.303	0.304	0.294
[truncated: 65 more columns]
